# Supplementary material
Source: PubMed Central journal article supplement (PMC3511987)
Supplement: mmc1.pdf [file mmc1.pdf]

The American Journal of Human Genetics, Volume 91

**Supplemental Data**

**Genomic Profiling of a Human Organotypic Model  
of AEC Syndrome Reveals *ZNF750* as an Essential  
Downstream Target of Mutant TP63**

Brian J. Zarnegar, Dan E. Webster, Vanessa Lopez-Pajares, Brook Vander Stoep Hunt, Kun  
Qu, Karen J. Yan, David R. Berk, George L. Sen, and Paul A. Khavari

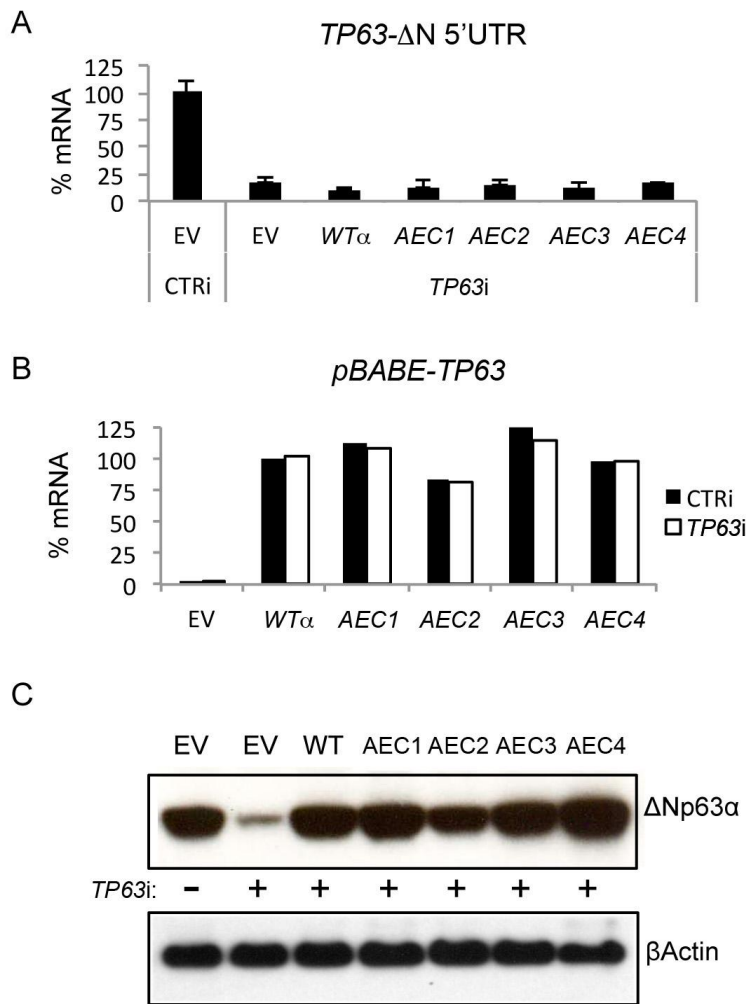

**Figure S1. Physiological Expression of Exogenous *TP63* Constructs**

Generation of developmentally mature *TP63* AEC mutant human keratinocytes.

(A) QPCR analysis of endogenous *TP63-ΔN* levels in human keratinocytes (KCs) transduced with control pBABE retrovirus -empty vector (EV), *TP63-ΔNp63α*-WT, -p.Leu459Phe (AEC1), -p.Cys467Trp (AEC2), -p.Ile482Thr (AEC3), or -p.Arg500Pro (AEC4). KCs were treated with control or siRNA specific for endogenous *TP63* as indicated (see Methods). Endogenous *TP63* levels were monitored using primers specific for the 5' UTR of *TP63-ΔN* 72 hr after nucleofection of siRNA. Error bars are +1 SD between triplicate samples.

(B) QPCR analysis of exogenous *pBABE-TP63* using primers specific for the murine *TP63* nucleotide sequence (see Methods).

(C) Immunoblot analysis of *TP63-ΔNp63α* and βActin levels in the control and AEC mutant cells treated with *TP63i* as indicated.

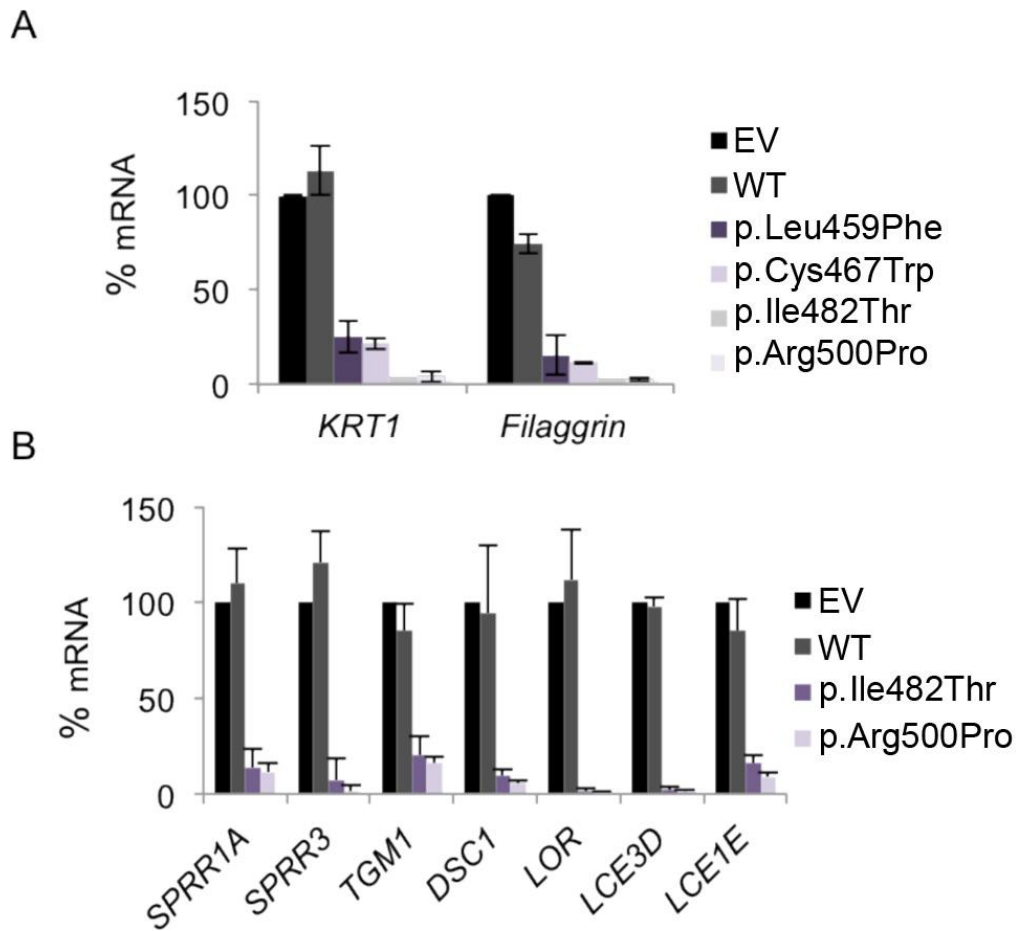

**Figure S2. Transcriptional Repression of Epidermal Differentiation by AEC Mutant TP63**

Disrupted transcriptional induction of epidermal differentiation genes in AEC model tissue. (A) QPCR analysis of *keratin 1* (*KRT1*) and *filaggrin* (B) and the indicated epidermal differentiation markers (B) in 4 d organotypic cultures generated from KCs transduced with control pBABE empty vector (EV) or the indicated *TP63-ΔNp63α* construct. Error bars are +1SD between triplicate samples.

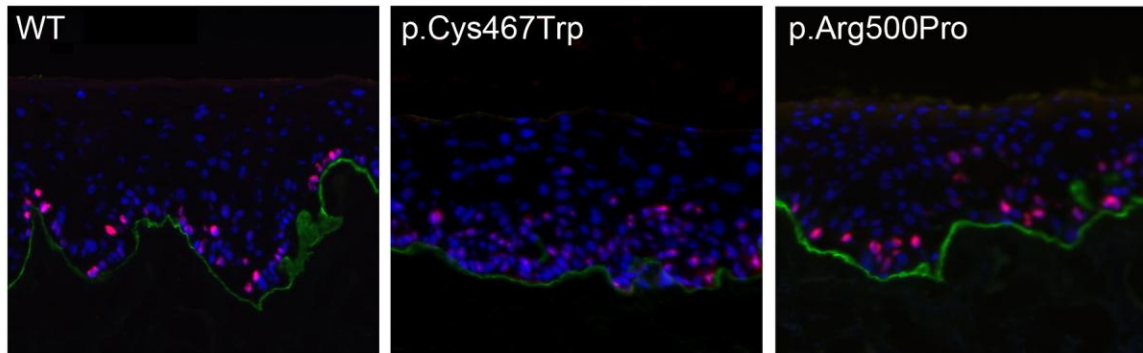

**Figure S3. Abnormal Suprabasal Ki67 in AEC Organotypic Cultures**

Suprabasal proliferation in AEC TP63 mutant organotypic cultures. Ki-67 staining in in *TP63-ΔNp63α*-WT, -p.Cys467Trp, and -p.Arg500Pro 4 d organotypic cultures (red=Ki-67 protein, blue=Hoechst 33342, green=basement membrane).

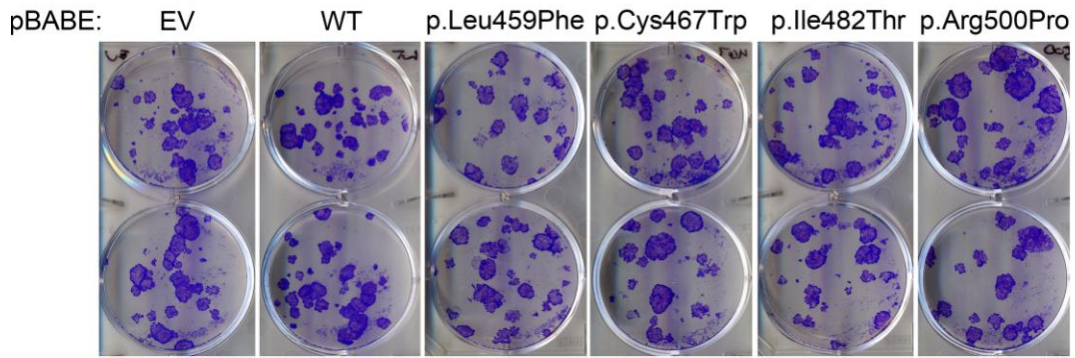

#### Figure S4. Clonogenicity of AEC Mutant TP63 Epidermal Progenitors

Analysis of AEC mutant TP63 impact on the clonogenicity of developmentally mature keratinocytes.

Puromycin selected primary keratinocytes expressing endogenous levels of the indicated pBABE-TP63- $\Delta$ Np63 $\alpha$  construct (verified as in Figure S1, data not shown) were seeded in duplicate in 6-well format at 80 cells per well. 1 day before seeding,  $5 \times 10^5$  puromycin resistant NIH 3T3s were seeded per well. 3T3s were pretreated with 1 $\mu$ g/ml mitomycin C for 2 hrs prior to seeding of keratinocytes. Cultures were grown for 12 days with media replacement every 3 days. Prior to methanol fixation and crystal violet staining, wells were washed with PBS to remove remaining 3T3s.

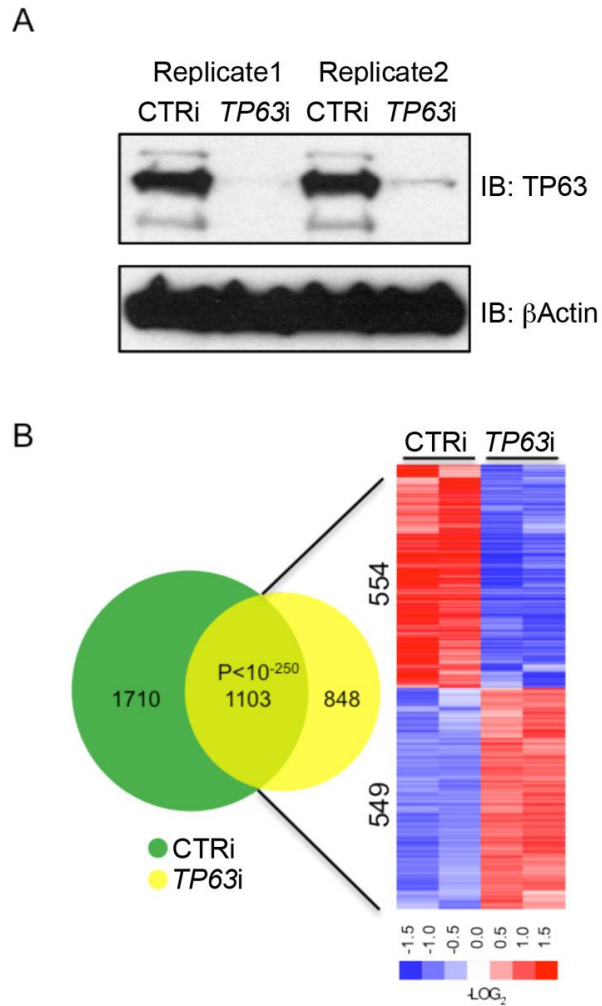

**Figure S5. TP63i Gene Signature**

Identification of TP63-dependent gene program in differentiated human keratinocytes.

(A) Immunoblot analysis of TP63 and  $\beta$ Actin levels in separate populations of human keratinocytes treated with control or pan-TP63 siRNA (CTRi v TP63i).

(B) Venn diagram illustrating overlap between changes identified in TP63i versus CTRi differentiated keratinocytes. Heat map of the 1103 genes shared between the two profiles (p-value <  $10^{-250}$ , Fisher's Exact Test); blue (repressed) and red (induced),  $\text{log}_2$ -based scale.

**Table S1. qPCR Primers**

| <b>Gene</b>              | <b>Forward</b>        | <b>Reverse</b>       |
|--------------------------|-----------------------|----------------------|
| <i>TP63 (5' UTR)</i>     | AGCCAGAAGAAAGGACAGCA  | GAGGAGCCGTTCTGAATCTG |
| <i>pBABE-murine-TP63</i> | CAGATTCAGAACGGCTCCTC  | GATGGAGAGAGGGCATCAA  |
| <i>L32</i>               | AGGCATTGACAACAGGGTTC  | GTTGCACATCAGCAGCACTT |
| <i>KRT1</i>              | CTTGACAACCTTGCAGCAGGA | TATCCTCGTACTGGGCCTTG |
| <i>FLG</i>               | CAAGAGGGTCAGGACACCAT  | TCTCTGCTTGCACTTCTGGA |
| <i>OVOL1</i>             | GCTCCCGGCTTCAGTTA     | GGGCTGTGGTGGGCAGAA   |
| <i>GRHL3</i>             | GGTGTTTCATCGGCGTAAACT | CCCAAGCCACAGTCATAGGT |
| <i>HOPX</i>              | TCGAGTGTGTGCTCATAGGC  | TTTGGAAGCTGTGTTTGCTG |
| <i>KLF4</i>              | GCCTCCTCTTCGTCTGTC    | GGCTCACGTCTGTTGATGT  |
| <i>PRDM1</i>             | CGGGACTCCTACGCTTAC    | TGCCATTCATGCTGCTCA   |
| <i>ZNF750</i>            | AGCTCGCCTGAGTGTGAC    | TGCAGACTCTGGCCTGTA   |
| <i>PPARD</i>             | GTGTGGAAGCAGTTGGTGAA  | TGCACGCCATACTTGAGAAG |
| <i>SPRR1A</i>            | GCCACTGGATACTGAACA    | AGGAAGACTAGGGATGGT   |
| <i>SPRR3</i>             | CCAGGCTACACAAAGCTAC   | GCTTAATTCAGGGGCTTAC  |
| <i>TGM1</i>              | TCAGACGCTGGGGAGTTC    | GGTCCGCTCACCAATCTG   |
| <i>DSC1</i>              | GTCCACCTCCTTTGTTGGAA  | GGCATCATCATACCCTGGAC |
| <i>LOR</i>               | CCGGTGGGAGCGTCAAGT    | AGGAGCCGCCGCTAGAGAC  |
| <i>LCE3D</i>             | GCTGCTTCCTGAACCAC     | GGGAACTCATGCATCAAG   |
| <i>LCE1E</i>             | CCTCCAGTCTCTTCCTGCTG  | AGAGCTCTGGGTCTGTGAC  |
| <b>Locus</b>             | <b>Forward</b>        | <b>Reverse</b>       |
| <i>ZNF750 Peak1</i>      | GGAGGGAGCTTATCCCAGAG  | CCTCCGATTAAGCAAGCAAG |
| <i>ZNF750 Peak2</i>      | GTTACGGCAGGGATCTGAAA  | GACGCAGCTCTCACTTGATG |

**Table S2. Genes that Are Induced or Repressed 1.8× or More in p.Ile482Thr versus Wild-type Organotypic Cultures**

| <b>Gene Symbol</b> | <b>Fold Change<br/>p.Ile482Thr</b> | <b>Gene Symbol</b> | <b>Fold Change<br/>p.Ile482Thr</b> |
|--------------------|------------------------------------|--------------------|------------------------------------|
| <i>LCE2B</i>       | 0.009                              | <i>ZNF766</i>      | 1.823                              |
| <i>SPRR2G</i>      | 0.014                              | <i>RPS15A</i>      | 1.823                              |
| <i>LCE1B</i>       | 0.014                              | <i>ACSL3</i>       | 1.824                              |
| <i>LCE3D</i>       | 0.027                              | <i>OPTN</i>        | 1.824                              |
| <i>RPTN</i>        | 0.029                              | <i>C1RL</i>        | 1.824                              |
| <i>RNASE7</i>      | 0.029                              | <i>DYRK2</i>       | 1.824                              |
| <i>LOR</i>         | 0.030                              | <i>MGST3</i>       | 1.824                              |
| <i>ARG1</i>        | 0.032                              | <i>ELP3</i>        | 1.826                              |
| <i>ELMOD1</i>      | 0.033                              | <i>SFRS7</i>       | 1.826                              |
| <i>C1orf46</i>     | 0.043                              | <i>PBK</i>         | 1.826                              |
| <i>CRCT1</i>       | 0.044                              | <i>RCN1</i>        | 1.827                              |
| <i>CALML3</i>      | 0.044                              | <i>UBE2E3</i>      | 1.828                              |
| <i>FLG2</i>        | 0.048                              | <i>IFI35</i>       | 1.828                              |
| <i>C10orf99</i>    | 0.052                              | <i>PEX12</i>       | 1.829                              |
| <i>WFDC5</i>       | 0.052                              | <i>GOPC</i>        | 1.829                              |
| <i>ASPRV1</i>      | 0.053                              | <i>CHORDC1</i>     | 1.830                              |
| <i>WFDC12</i>      | 0.053                              | <i>C2orf55</i>     | 1.830                              |
| <i>DSC1</i>        | 0.054                              | <i>CCNY</i>        | 1.830                              |
| <i>KRT9</i>        | 0.054                              | <i>NRP1</i>        | 1.831                              |
| <i>HMOX1</i>       | 0.055                              | <i>GPR126</i>      | 1.831                              |
| <i>AZGP1</i>       | 0.062                              | <i>ZNF639</i>      | 1.831                              |
| <i>HAL</i>         | 0.064                              | <i>CCNYL1</i>      | 1.832                              |
| <i>BLMH</i>        | 0.065                              | <i>UBE2I</i>       | 1.833                              |
| <i>LYPD5</i>       | 0.071                              | <i>DIXDC1</i>      | 1.834                              |
| <i>SDR9C7</i>      | 0.078                              | <i>PCBD1</i>       | 1.835                              |
| <i>ALOX12B</i>     | 0.081                              | <i>IRF1</i>        | 1.836                              |
| <i>RORA</i>        | 0.083                              | <i>CCNI</i>        | 1.837                              |
| <i>CIDEA</i>       | 0.090                              | <i>BFAR</i>        | 1.837                              |
| <i>DHRS9</i>       | 0.091                              | <i>PRKCA</i>       | 1.839                              |
| <i>CDSN</i>        | 0.092                              | <i>IMPA1</i>       | 1.839                              |
| <i>AADAACL2</i>    | 0.093                              | <i>TFB2M</i>       | 1.839                              |
| <i>BPIL2</i>       | 0.095                              | <i>SLC22A5</i>     | 1.840                              |
| <i>ATP6V1C2</i>    | 0.098                              | <i>RBM3</i>        | 1.840                              |
| <i>LCE1E</i>       | 0.099                              | <i>EBAG9</i>       | 1.840                              |
| <i>CST6</i>        | 0.099                              | <i>PIGW</i>        | 1.841                              |
| <i>ANXA9</i>       | 0.108                              | <i>QDPR</i>        | 1.842                              |
| <i>ADAP2</i>       | 0.112                              | <i>SEPT9</i>       | 1.842                              |
| <i>DAPL1</i>       | 0.112                              | <i>PPIL4</i>       | 1.843                              |
| <i>KRT23</i>       | 0.113                              | <i>MBOAT1</i>      | 1.843                              |



| <b>Gene Symbol</b> | <b>Fold Change<br/>p.Ile482Thr</b> | <b>Gene Symbol</b> | <b>Fold Change<br/>p.Ile482Thr</b> |
|--------------------|------------------------------------|--------------------|------------------------------------|
| <i>CYP4F22</i>     | 0.114                              | <i>TMEM8A</i>      | 1.844                              |
| <i>ATP10B</i>      | 0.114                              | <i>POMGNT1</i>     | 1.844                              |
| <i>S100A12</i>     | 0.116                              | <i>RHEB</i>        | 1.844                              |
| <i>KLK6</i>        | 0.116                              | <i>ANO1</i>        | 1.846                              |
| <i>MFAP3L</i>      | 0.117                              | <i>ZNF362</i>      | 1.847                              |
| <i>SERPINA12</i>   | 0.123                              | <i>PSMF1</i>       | 1.847                              |
| <i>HSPB8</i>       | 0.124                              | <i>CEP68</i>       | 1.847                              |
| <i>HPSE</i>        | 0.125                              | <i>SHCBP1</i>      | 1.848                              |
| <i>SLC46A2</i>     | 0.126                              | <i>TRIM16</i>      | 1.848                              |
| <i>MARCH3</i>      | 0.127                              | <i>PARP9</i>       | 1.848                              |
| <i>SPRR4</i>       | 0.128                              | <i>RSAD2</i>       | 1.850                              |
| <i>CTSH</i>        | 0.128                              | <i>CXCL6</i>       | 1.853                              |
| <i>KRT77</i>       | 0.131                              | <i>YEATS4</i>      | 1.855                              |
| <i>CASP14</i>      | 0.132                              | <i>PROSC</i>       | 1.856                              |
| <i>FLG</i>         | 0.135                              | <i>MGAT2</i>       | 1.857                              |
| <i>RDH12</i>       | 0.135                              | <i>RAD51C</i>      | 1.857                              |
| <i>HPGD</i>        | 0.136                              | <i>PAFAH1B3</i>    | 1.857                              |
| <i>KRT2</i>        | 0.137                              | <i>ZNF271</i>      | 1.858                              |
| <i>SPRR3</i>       | 0.137                              | <i>MAVS</i>        | 1.858                              |
| <i>BCHE</i>        | 0.137                              | <i>ARHGAP12</i>    | 1.858                              |
| <i>OASL</i>        | 0.137                              | <i>FNDC3A</i>      | 1.860                              |
| <i>SMPD3</i>       | 0.139                              | <i>TRAF4</i>       | 1.860                              |
| <i>TGM3</i>        | 0.140                              | <i>C10orf18</i>    | 1.861                              |
| <i>IL1F9</i>       | 0.145                              | <i>BACE2</i>       | 1.861                              |
| <i>TGM5</i>        | 0.148                              | <i>OTUD6B</i>      | 1.863                              |
| <i>GLRX</i>        | 0.148                              | <i>GULP1</i>       | 1.863                              |
| <i>SLCO2A1</i>     | 0.149                              | <i>TEP1</i>        | 1.864                              |
| <i>PSAPL1</i>      | 0.150                              | <i>KIF14</i>       | 1.864                              |
| <i>PLBD1</i>       | 0.150                              | <i>LOC440995</i>   | 1.865                              |
| <i>CRYAB</i>       | 0.151                              | <i>KLHL29</i>      | 1.867                              |
| <i>KLK13</i>       | 0.152                              | <i>HNRNPA0</i>     | 1.867                              |
| <i>ATP12A</i>      | 0.153                              | <i>SENP8</i>       | 1.867                              |
| <i>CRNN</i>        | 0.153                              | <i>SOAT1</i>       | 1.867                              |
| <i>EPHB6</i>       | 0.155                              | <i>IFIH1</i>       | 1.868                              |
| <i>DIO2</i>        | 0.155                              | <i>IPO7</i>        | 1.868                              |
| <i>FABP7</i>       | 0.155                              | <i>BRI3</i>        | 1.869                              |
| <i>RNF39</i>       | 0.157                              | <i>NAB1</i>        | 1.869                              |
| <i>SLC5A1</i>      | 0.158                              | <i>H2AFV</i>       | 1.870                              |
| <i>LOC147645</i>   | 0.158                              | <i>IRS1</i>        | 1.870                              |
| <i>CPM</i>         | 0.161                              | <i>SLC26A2</i>     | 1.871                              |
| <i>GPX3</i>        | 0.161                              | <i>NEK4</i>        | 1.871                              |

| <b>Gene Symbol</b> | <b>Fold Change<br/>p.Ile482Thr</b> | <b>Gene Symbol</b> | <b>Fold Change<br/>p.Ile482Thr</b> |
|--------------------|------------------------------------|--------------------|------------------------------------|
| <i>CNFN</i>        | 0.163                              | <i>RAD51</i>       | 1.872                              |
| <i>RFTN1</i>       | 0.165                              | <i>RSPRY1</i>      | 1.872                              |
| <i>NMU</i>         | 0.165                              | <i>CYFIP2</i>      | 1.872                              |
| <i>TREX2</i>       | 0.166                              | <i>ANLN</i>        | 1.874                              |
| <i>AQP9</i>        | 0.166                              | <i>IGFBP7</i>      | 1.876                              |
| <i>ALOXE3</i>      | 0.166                              | <i>ARMC10</i>      | 1.876                              |
| <i>LY6G6C</i>      | 0.168                              | <i>CCDC99</i>      | 1.877                              |
| <i>LRMP</i>        | 0.171                              | <i>LOC153346</i>   | 1.877                              |
| <i>SBSN</i>        | 0.176                              | <i>METTL13</i>     | 1.878                              |
| <i>TGM1</i>        | 0.179                              | <i>KLF12</i>       | 1.878                              |
| <i>IL1F5</i>       | 0.181                              | <i>LOC93622</i>    | 1.879                              |
| <i>C15orf48</i>    | 0.182                              | <i>LLGL2</i>       | 1.880                              |
| <i>NFATC2</i>      | 0.186                              | <i>SHPRH</i>       | 1.880                              |
| <i>USP2</i>        | 0.186                              | <i>FAS</i>         | 1.880                              |
| <i>LASS3</i>       | 0.189                              | <i>UXS1</i>        | 1.880                              |
| <i>ACER1</i>       | 0.195                              | <i>C19orf21</i>    | 1.880                              |
| <i>GAS7</i>        | 0.195                              | <i>TMEM14A</i>     | 1.881                              |
| <i>IL1F10</i>      | 0.198                              | <i>C15orf40</i>    | 1.882                              |
| <i>CEBPA</i>       | 0.199                              | <i>BBS12</i>       | 1.882                              |
| <i>NDRG4</i>       | 0.204                              | <i>L1CAM</i>       | 1.883                              |
| <i>HYAL4</i>       | 0.204                              | <i>TAPT1</i>       | 1.883                              |
| <i>DGAT2</i>       | 0.207                              | <i>TLR3</i>        | 1.884                              |
| <i>ACSBG1</i>      | 0.208                              | <i>POLR3E</i>      | 1.884                              |
| <i>OTUB2</i>       | 0.208                              | <i>C11orf52</i>    | 1.884                              |
| <i>DUSP1</i>       | 0.209                              | <i>TRAK2</i>       | 1.885                              |
| <i>SLC16A10</i>    | 0.209                              | <i>DCK</i>         | 1.887                              |
| <i>BNIP3</i>       | 0.214                              | <i>C6orf204</i>    | 1.888                              |
| <i>GBP6</i>        | 0.214                              | <i>PYROXD1</i>     | 1.889                              |
| <i>HSD11B1</i>     | 0.215                              | <i>SAP18</i>       | 1.890                              |
| <i>FCHSD1</i>      | 0.215                              | <i>TRIM59</i>      | 1.890                              |
| <i>YOD1</i>        | 0.218                              | <i>LOC375295</i>   | 1.891                              |
| <i>ARG2</i>        | 0.219                              | <i>IPO4</i>        | 1.891                              |
| <i>NLRP10</i>      | 0.220                              | <i>KDEL3</i>       | 1.892                              |
| <i>FRY</i>         | 0.220                              | <i>DNAJB4</i>      | 1.892                              |
| <i>KRT31</i>       | 0.222                              | <i>C3orf23</i>     | 1.893                              |
| <i>ARL5A</i>       | 0.225                              | <i>RRP15</i>       | 1.894                              |
| <i>HS3ST6</i>      | 0.226                              | <i>MED17</i>       | 1.895                              |
| <i>KRT78</i>       | 0.226                              | <i>RILPL2</i>      | 1.895                              |
| <i>SLC15A1</i>     | 0.229                              | <i>MAP3K5</i>      | 1.896                              |
| <i>KRT34</i>       | 0.236                              | <i>TMEM68</i>      | 1.897                              |
| <i>NEAT1</i>       | 0.236                              | <i>TPD52L1</i>     | 1.898                              |

| <b>Gene Symbol</b>  | <b>Fold Change<br/>p.Ile482Thr</b> | <b>Gene Symbol</b>  | <b>Fold Change<br/>p.Ile482Thr</b> |
|---------------------|------------------------------------|---------------------|------------------------------------|
| <i>EGR3</i>         | 0.237                              | <i>PRRG1</i>        | 1.900                              |
| <i>KRT1</i>         | 0.237                              | <i>MTFR1</i>        | 1.900                              |
| <i>ABCG1</i>        | 0.240                              | <i>FTHP1</i>        | 1.901                              |
| <i>RBP7</i>         | 0.240                              | <i>LYSMD2</i>       | 1.902                              |
| <i>RAET1E</i>       | 0.243                              | <i>ZNF532</i>       | 1.903                              |
| <i>BBOX1</i>        | 0.244                              | <i>MLANA</i>        | 1.903                              |
| <i>SCNN1B</i>       | 0.245                              | <i>SHROOM3</i>      | 1.904                              |
| <i>SPNS2</i>        | 0.246                              | <i>LOC100129361</i> | 1.905                              |
| <i>SLC19A3</i>      | 0.248                              | <i>TWISTNB</i>      | 1.907                              |
| <i>PSORS1C2</i>     | 0.248                              | <i>DDX20</i>        | 1.908                              |
| <i>PDZK1IP1</i>     | 0.251                              | <i>B4GALT5</i>      | 1.908                              |
| <i>KCTD4</i>        | 0.254                              | <i>LYN</i>          | 1.908                              |
| <i>C1orf68</i>      | 0.255                              | <i>ZCCHC2</i>       | 1.909                              |
| <i>ARRDC4</i>       | 0.257                              | <i>TATDN1</i>       | 1.910                              |
| <i>DUOXA1</i>       | 0.259                              | <i>C16orf5</i>      | 1.911                              |
| <i>PLA2G3</i>       | 0.261                              | <i>TPPP</i>         | 1.911                              |
| <i>CALML5</i>       | 0.261                              | <i>FANCD2</i>       | 1.912                              |
| <i>ABCA12</i>       | 0.261                              | <i>TIPIN</i>        | 1.913                              |
| <i>NEB</i>          | 0.262                              | <i>NUDT21</i>       | 1.914                              |
| <i>LOC100130476</i> | 0.263                              | <i>ZNF703</i>       | 1.914                              |
| <i>CARD18</i>       | 0.264                              | <i>MXRA5</i>        | 1.914                              |
| <i>ALOX12</i>       | 0.266                              | <i>PPP3R1</i>       | 1.915                              |
| <i>RCAN1</i>        | 0.267                              | <i>HERC6</i>        | 1.915                              |
| <i>SCNN1A</i>       | 0.269                              | <i>FAM134A</i>      | 1.916                              |
| <i>POF1B</i>        | 0.270                              | <i>SHISA2</i>       | 1.917                              |
| <i>PCSK6</i>        | 0.271                              | <i>LZTFL1</i>       | 1.917                              |
| <i>CSNK2A2</i>      | 0.272                              | <i>PDLIM4</i>       | 1.917                              |
| <i>SLCO4A1</i>      | 0.273                              | <i>SUB1</i>         | 1.917                              |
| <i>FILIP1L</i>      | 0.275                              | <i>CENPB</i>        | 1.918                              |
| <i>DEGS2</i>        | 0.276                              | <i>KBTBD6</i>       | 1.920                              |
| <i>ELOVL4</i>       | 0.277                              | <i>PGM2L1</i>       | 1.920                              |
| <i>OVOL1</i>        | 0.278                              | <i>FXN</i>          | 1.920                              |
| <i>IL1R2</i>        | 0.278                              | <i>NANOS1</i>       | 1.923                              |
| <i>NPR2</i>         | 0.282                              | <i>MAGI3</i>        | 1.923                              |
| <i>PTGER3</i>       | 0.283                              | <i>TTC27</i>        | 1.923                              |
| <i>GLTP</i>         | 0.284                              | <i>PLEKHA3</i>      | 1.924                              |
| <i>GGT6</i>         | 0.287                              | <i>PDCD4</i>        | 1.924                              |
| <i>EXPH5</i>        | 0.287                              | <i>FAM92A1</i>      | 1.924                              |
| <i>STXBP6</i>       | 0.288                              | <i>EPB41L2</i>      | 1.924                              |
| <i>PTGS2</i>        | 0.290                              | <i>C9orf41</i>      | 1.924                              |
| <i>ATP2C2</i>       | 0.291                              | <i>ZNF706</i>       | 1.925                              |

| <b>Gene Symbol</b> | <b>Fold Change<br/>p.Ile482Thr</b> | <b>Gene Symbol</b> | <b>Fold Change<br/>p.Ile482Thr</b> |
|--------------------|------------------------------------|--------------------|------------------------------------|
| <i>CALB2</i>       | 0.293                              | <i>NPEPL1</i>      | 1.925                              |
| <i>ANKRD22</i>     | 0.296                              | <i>CAV2</i>        | 1.926                              |
| <i>IFFO2</i>       | 0.296                              | <i>DCAF17</i>      | 1.927                              |
| <i>GRHL1</i>       | 0.297                              | <i>C16orf14</i>    | 1.930                              |
| <i>TMEM40</i>      | 0.300                              | <i>IFIT5</i>       | 1.933                              |
| <i>NDUFA4L2</i>    | 0.301                              | <i>C3orf14</i>     | 1.933                              |
| <i>HSPC159</i>     | 0.301                              | <i>RPL23</i>       | 1.933                              |
| <i>PYDC1</i>       | 0.304                              | <i>GCHFR</i>       | 1.934                              |
| <i>CHRNA9</i>      | 0.305                              | <i>PACSIN3</i>     | 1.937                              |
| <i>LOC283404</i>   | 0.305                              | <i>C7orf23</i>     | 1.937                              |
| <i>DUOX1</i>       | 0.308                              | <i>CABC1</i>       | 1.938                              |
| <i>TNNT2</i>       | 0.308                              | <i>GOLM1</i>       | 1.938                              |
| <i>SOX7</i>        | 0.308                              | <i>RFFL</i>        | 1.938                              |
| <i>TMEM86A</i>     | 0.311                              | <i>DCI</i>         | 1.938                              |
| <i>MCAM</i>        | 0.312                              | <i>HELLS</i>       | 1.940                              |
| <i>ADM</i>         | 0.313                              | <i>PIGK</i>        | 1.940                              |
| <i>GDPD3</i>       | 0.315                              | <i>ZNF329</i>      | 1.942                              |
| <i>KRT33A</i>      | 0.316                              | <i>ATE1</i>        | 1.944                              |
| <i>PLCXD1</i>      | 0.318                              | <i>DNAH14</i>      | 1.944                              |
| <i>BCO2</i>        | 0.318                              | <i>CCDC111</i>     | 1.944                              |
| <i>PRSS27</i>      | 0.319                              | <i>EIF2AK4</i>     | 1.944                              |
| <i>hCG_1817306</i> | 0.319                              | <i>C4orf46</i>     | 1.945                              |
| <i>LASS4</i>       | 0.319                              | <i>SLC25A38</i>    | 1.946                              |
| <i>TTC39A</i>      | 0.320                              | <i>GALC</i>        | 1.949                              |
| <i>DNASE1L2</i>    | 0.321                              | <i>BCL2L11</i>     | 1.950                              |
| <i>EPS8L1</i>      | 0.322                              | <i>KRT18</i>       | 1.950                              |
| <i>RASGRP1</i>     | 0.323                              | <i>APEX1</i>       | 1.950                              |
| <i>ELOVL7</i>      | 0.323                              | <i>BEND3</i>       | 1.951                              |
| <i>TXNIP</i>       | 0.323                              | <i>ETV6</i>        | 1.951                              |
| <i>DLX5</i>        | 0.324                              | <i>SLC7A11</i>     | 1.953                              |
| <i>UBR4</i>        | 0.324                              | <i>NETO2</i>       | 1.954                              |
| <i>PAQR5</i>       | 0.326                              | <i>NCRNA00081</i>  | 1.956                              |
| <i>PNPLA1</i>      | 0.326                              | <i>SDC4</i>        | 1.956                              |
| <i>FAM43A</i>      | 0.327                              | <i>NUP35</i>       | 1.957                              |
| <i>C15orf59</i>    | 0.327                              | <i>GPR39</i>       | 1.959                              |
| <i>RGS2</i>        | 0.327                              | <i>INPP5D</i>      | 1.960                              |
| <i>MLLT11</i>      | 0.328                              | <i>CCND2</i>       | 1.960                              |
| <i>LYNX1</i>       | 0.329                              | <i>ARSI</i>        | 1.961                              |
| <i>IDE</i>         | 0.329                              | <i>DLGAP5</i>      | 1.961                              |
| <i>DEFB4</i>       | 0.330                              | <i>MRPL2</i>       | 1.961                              |
| <i>C5orf46</i>     | 0.333                              | <i>SRM</i>         | 1.963                              |

| <b>Gene Symbol</b> | <b>Fold Change<br/>p.Ile482Thr</b> | <b>Gene Symbol</b> | <b>Fold Change<br/>p.Ile482Thr</b> |
|--------------------|------------------------------------|--------------------|------------------------------------|
| <i>AVPI1</i>       | 0.334                              | <i>TMEM33</i>      | 1.963                              |
| <i>IL1F7</i>       | 0.334                              | <i>ID4</i>         | 1.964                              |
| <i>TM7SF2</i>      | 0.335                              | <i>C20orf29</i>    | 1.965                              |
| <i>HK2</i>         | 0.335                              | <i>WARS2</i>       | 1.966                              |
| <i>LOC283070</i>   | 0.335                              | <i>POLR1C</i>      | 1.966                              |
| <i>EGLN3</i>       | 0.335                              | <i>SGK3</i>        | 1.967                              |
| <i>IL1F8</i>       | 0.337                              | <i>SGK1</i>        | 1.967                              |
| <i>ST3GAL6</i>     | 0.337                              | <i>ZNF608</i>      | 1.967                              |
| <i>KLK12</i>       | 0.338                              | <i>TRIB2</i>       | 1.968                              |
| <i>FGD2</i>        | 0.339                              | <i>BMP6</i>        | 1.969                              |
| <i>CITED2</i>      | 0.340                              | <i>ANAPC7</i>      | 1.970                              |
| <i>KIAA0513</i>    | 0.343                              | <i>ABAT</i>        | 1.970                              |
| <i>ESYT3</i>       | 0.343                              | <i>INPP4A</i>      | 1.970                              |
| <i>HOPX</i>        | 0.343                              | <i>ERLIN2</i>      | 1.971                              |
| <i>CTSD</i>        | 0.343                              | <i>CD44</i>        | 1.972                              |
| <i>MPZL3</i>       | 0.345                              | <i>PPP3CA</i>      | 1.972                              |
| <i>H19</i>         | 0.345                              | <i>HIBCH</i>       | 1.972                              |
| <i>ALDH5A1</i>     | 0.347                              | <i>BCKDHB</i>      | 1.973                              |
| <i>PSMG4</i>       | 0.348                              | <i>TBC1D8</i>      | 1.973                              |
| <i>GBAP</i>        | 0.348                              | <i>NDFIP1</i>      | 1.974                              |
| <i>KIAA1239</i>    | 0.348                              | <i>STRBP</i>       | 1.975                              |
| <i>AMDHD1</i>      | 0.348                              | <i>RNF14</i>       | 1.979                              |
| <i>MAP2</i>        | 0.354                              | <i>TMEM106B</i>    | 1.979                              |
| <i>VASN</i>        | 0.354                              | <i>MRPL44</i>      | 1.981                              |
| <i>NIPAL4</i>      | 0.354                              | <i>GAL</i>         | 1.981                              |
| <i>CREG1</i>       | 0.354                              | <i>COX18</i>       | 1.982                              |
| <i>FAM89A</i>      | 0.360                              | <i>LPXN</i>        | 1.983                              |
| <i>PGF</i>         | 0.361                              | <i>EEF2K</i>       | 1.985                              |
| <i>CXCL14</i>      | 0.361                              | <i>C3</i>          | 1.986                              |
| <i>GPLD1</i>       | 0.362                              | <i>ACTL6A</i>      | 1.987                              |
| <i>KRT80</i>       | 0.363                              | <i>PXMP2</i>       | 1.987                              |
| <i>PLIN2</i>       | 0.364                              | <i>SAV1</i>        | 1.988                              |
| <i>FGF11</i>       | 0.364                              | <i>C4orf18</i>     | 1.989                              |
| <i>CAMK1D</i>      | 0.366                              | <i>BEAN</i>        | 1.992                              |
| <i>LOC729994</i>   | 0.366                              | <i>SLC25A16</i>    | 1.993                              |
| <i>SLURP1</i>      | 0.367                              | <i>PODXL</i>       | 1.994                              |
| <i>BDNF</i>        | 0.368                              | <i>RCHY1</i>       | 1.994                              |
| <i>GPT2</i>        | 0.369                              | <i>ENTPD6</i>      | 1.994                              |
| <i>CARD14</i>      | 0.371                              | <i>TSHZ1</i>       | 1.995                              |
| <i>ANKRD35</i>     | 0.371                              | <i>C10orf10</i>    | 1.995                              |
| <i>SLC31A2</i>     | 0.372                              | <i>ROBO4</i>       | 1.996                              |

| <b>Gene Symbol</b> | <b>Fold Change<br/>p.Ile482Thr</b> | <b>Gene Symbol</b> | <b>Fold Change<br/>p.Ile482Thr</b> |
|--------------------|------------------------------------|--------------------|------------------------------------|
| <i>GJB6</i>        | 0.372                              | <i>C7orf49</i>     | 1.996                              |
| <i>PPP4R4</i>      | 0.373                              | <i>LOC729680</i>   | 1.997                              |
| <i>QPCT</i>        | 0.373                              | <i>IRX5</i>        | 1.998                              |
| <i>SLC22A23</i>    | 0.374                              | <i>PDCD2L</i>      | 1.998                              |
| <i>PIM1</i>        | 0.376                              | <i>FCHSD2</i>      | 1.998                              |
| <i>PLXDC2</i>      | 0.378                              | <i>IFI44L</i>      | 2.003                              |
| <i>ODZ2</i>        | 0.379                              | <i>ADO</i>         | 2.004                              |
| <i>PRCP</i>        | 0.381                              | <i>DGKQ</i>        | 2.004                              |
| <i>EPB41L3</i>     | 0.381                              | <i>ELF3</i>        | 2.005                              |
| <i>PLCD4</i>       | 0.382                              | <i>GALNT5</i>      | 2.005                              |
| <i>MID2</i>        | 0.382                              | <i>EPB41L4A</i>    | 2.007                              |
| <i>LTB4R</i>       | 0.382                              | <i>CDK6</i>        | 2.007                              |
| <i>LRRC20</i>      | 0.383                              | <i>CD3EAP</i>      | 2.009                              |
| <i>IL22RA1</i>     | 0.383                              | <i>GORAB</i>       | 2.011                              |
| <i>AMPD3</i>       | 0.383                              | <i>FAM3C</i>       | 2.012                              |
| <i>NELL2</i>       | 0.385                              | <i>NIPAL3</i>      | 2.012                              |
| <i>WSB1</i>        | 0.386                              | <i>FAM13B</i>      | 2.012                              |
| <i>CALN1</i>       | 0.386                              | <i>MANEA</i>       | 2.014                              |
| <i>TMPRSS13</i>    | 0.387                              | <i>MEX3D</i>       | 2.018                              |
| <i>GDA</i>         | 0.387                              | <i>RAB43</i>       | 2.020                              |
| <i>PPARD</i>       | 0.389                              | <i>HSPA12A</i>     | 2.020                              |
| <i>MUC15</i>       | 0.390                              | <i>AGR2</i>        | 2.024                              |
| <i>LOC645638</i>   | 0.390                              | <i>SPA17</i>       | 2.026                              |
| <i>SDR16C5</i>     | 0.390                              | <i>LEPR</i>        | 2.027                              |
| <i>ZNF107</i>      | 0.393                              | <i>IL27RA</i>      | 2.028                              |
| <i>DNAJB5</i>      | 0.394                              | <i>CSRP2</i>       | 2.028                              |
| <i>FGD3</i>        | 0.395                              | <i>TMEM129</i>     | 2.029                              |
| <i>GRAMD1C</i>     | 0.395                              | <i>EAF2</i>        | 2.030                              |
| <i>SPTLC3</i>      | 0.396                              | <i>ECT2</i>        | 2.030                              |
| <i>BLVRB</i>       | 0.396                              | <i>METTL7A</i>     | 2.032                              |
| <i>MBD1</i>        | 0.397                              | <i>ADAT1</i>       | 2.032                              |
| <i>TPRG1</i>       | 0.398                              | <i>FLJ20674</i>    | 2.038                              |
| <i>SLC37A2</i>     | 0.398                              | <i>SLC6A14</i>     | 2.040                              |
| <i>PAQR7</i>       | 0.398                              | <i>C6orf211</i>    | 2.041                              |
| <i>DSG1</i>        | 0.399                              | <i>KLF9</i>        | 2.041                              |
| <i>RPL27</i>       | 0.400                              | <i>RCOR3</i>       | 2.042                              |
| <i>PPP2R2C</i>     | 0.404                              | <i>ADH5</i>        | 2.043                              |
| <i>SULT2B1</i>     | 0.404                              | <i>CCNB1</i>       | 2.044                              |
| <i>FHDC1</i>       | 0.404                              | <i>RPS27L</i>      | 2.045                              |
| <i>GRHL3</i>       | 0.404                              | <i>ALCAM</i>       | 2.051                              |
| <i>PGLYRP4</i>     | 0.404                              | <i>TFAM</i>        | 2.052                              |

| <b>Gene Symbol</b> | <b>Fold Change<br/>p.Ile482Thr</b> | <b>Gene Symbol</b> | <b>Fold Change<br/>p.Ile482Thr</b> |
|--------------------|------------------------------------|--------------------|------------------------------------|
| <i>TST</i>         | 0.405                              | <i>RWDD2B</i>      | 2.054                              |
| <i>PSG7</i>        | 0.406                              | <i>C5orf24</i>     | 2.056                              |
| <i>EPHX3</i>       | 0.406                              | <i>PDHA1</i>       | 2.059                              |
| <i>MEG3</i>        | 0.407                              | <i>ANXA4</i>       | 2.062                              |
| <i>UGCG</i>        | 0.409                              | <i>FYN</i>         | 2.062                              |
| <i>GSTA4</i>       | 0.412                              | <i>NPAS2</i>       | 2.063                              |
| <i>CPA4</i>        | 0.414                              | <i>PSAT1</i>       | 2.063                              |
| <i>EHF</i>         | 0.415                              | <i>FAM26F</i>      | 2.067                              |
| <i>KCTD11</i>      | 0.415                              | <i>ADAM19</i>      | 2.068                              |
| <i>ABLIM1</i>      | 0.416                              | <i>SLC39A10</i>    | 2.069                              |
| <i>MXD1</i>        | 0.416                              | <i>FECH</i>        | 2.070                              |
| <i>EPN3</i>        | 0.418                              | <i>TMEM64</i>      | 2.071                              |
| <i>SORT1</i>       | 0.418                              | <i>ABCB10</i>      | 2.073                              |
| <i>LOC642587</i>   | 0.419                              | <i>ATP11C</i>      | 2.073                              |
| <i>XKRX</i>        | 0.420                              | <i>SLC17A5</i>     | 2.075                              |
| <i>DUSP14</i>      | 0.424                              | <i>C13orf23</i>    | 2.076                              |
| <i>VNN3</i>        | 0.424                              | <i>P4HTM</i>       | 2.076                              |
| <i>MUCL1</i>       | 0.427                              | <i>FBXL16</i>      | 2.078                              |
| <i>CHP2</i>        | 0.428                              | <i>MICB</i>        | 2.078                              |
| <i>NLRX1</i>       | 0.429                              | <i>ZDHHC2</i>      | 2.078                              |
| <i>DLX3</i>        | 0.430                              | <i>RQCD1</i>       | 2.080                              |
| <i>TMEM184A</i>    | 0.431                              | <i>ME2</i>         | 2.081                              |
| <i>G0S2</i>        | 0.431                              | <i>ARMCX5</i>      | 2.083                              |
| <i>ETNK2</i>       | 0.432                              | <i>PSTPIP2</i>     | 2.083                              |
| <i>PLA2G4F</i>     | 0.432                              | <i>MACC1</i>       | 2.085                              |
| <i>PCYOX1L</i>     | 0.433                              | <i>TSPAN13</i>     | 2.085                              |
| <i>CA12</i>        | 0.434                              | <i>ZFAND1</i>      | 2.085                              |
| <i>GABRE</i>       | 0.434                              | <i>COX16</i>       | 2.086                              |
| <i>NDRG1</i>       | 0.434                              | <i>C17orf101</i>   | 2.088                              |
| <i>C9orf169</i>    | 0.435                              | <i>PQLC3</i>       | 2.088                              |
| <i>SLC2A1</i>      | 0.435                              | <i>FAM76B</i>      | 2.091                              |
| <i>PRSS8</i>       | 0.436                              | <i>SAMHD1</i>      | 2.093                              |
| <i>RASAL1</i>      | 0.437                              | <i>NUDT7</i>       | 2.095                              |
| <i>ABCG4</i>       | 0.439                              | <i>IL7R</i>        | 2.098                              |
| <i>HOMER2</i>      | 0.440                              | <i>ISG15</i>       | 2.098                              |
| <i>RAB11FIP1</i>   | 0.441                              | <i>OPN3</i>        | 2.102                              |
| <i>BICD2</i>       | 0.441                              | <i>C1GALT1C1</i>   | 2.104                              |
| <i>TMPRSS11D</i>   | 0.443                              | <i>TPRXL</i>       | 2.107                              |
| <i>CCDC90A</i>     | 0.444                              | <i>ERP27</i>       | 2.111                              |
| <i>MAST4</i>       | 0.445                              | <i>ACP6</i>        | 2.111                              |
| <i>MAP1LC3A</i>    | 0.445                              | <i>CHCHD7</i>      | 2.112                              |

| <b>Gene Symbol</b> | <b>Fold Change<br/>p.Ile482Thr</b> | <b>Gene Symbol</b> | <b>Fold Change<br/>p.Ile482Thr</b> |
|--------------------|------------------------------------|--------------------|------------------------------------|
| <i>BNIP3L</i>      | 0.446                              | <i>TIMP2</i>       | 2.114                              |
| <i>ALDOC</i>       | 0.446                              | <i>ALG14</i>       | 2.114                              |
| <i>FLJ40330</i>    | 0.446                              | <i>RAB40B</i>      | 2.115                              |
| <i>GNAL</i>        | 0.447                              | <i>ZNF267</i>      | 2.115                              |
| <i>RUNDC3A</i>     | 0.447                              | <i>DUT</i>         | 2.116                              |
| <i>VEGFA</i>       | 0.449                              | <i>FAM179B</i>     | 2.117                              |
| <i>NKPD1</i>       | 0.449                              | <i>ASNS</i>        | 2.119                              |
| <i>TLR2</i>        | 0.449                              | <i>TBCKL</i>       | 2.120                              |
| <i>TNFRSF25</i>    | 0.450                              | <i>PKIG</i>        | 2.120                              |
| <i>PLAC2</i>       | 0.452                              | <i>C17orf48</i>    | 2.122                              |
| <i>LGALS8</i>      | 0.454                              | <i>FLJ39051</i>    | 2.123                              |
| <i>ZNF750</i>      | 0.455                              | <i>ELL3</i>        | 2.123                              |
| <i>EML1</i>        | 0.455                              | <i>SPRED2</i>      | 2.126                              |
| <i>HSPA4L</i>      | 0.456                              | <i>HDAC9</i>       | 2.126                              |
| <i>PPIF</i>        | 0.457                              | <i>RPS23</i>       | 2.127                              |
| <i>TP53INP2</i>    | 0.458                              | <i>CXCL11</i>      | 2.128                              |
| <i>ALDH3B2</i>     | 0.459                              | <i>IQCE</i>        | 2.128                              |
| <i>ZNF91</i>       | 0.460                              | <i>PYGB</i>        | 2.132                              |
| <i>ITSN2</i>       | 0.460                              | <i>TAF3</i>        | 2.133                              |
| <i>KDM3A</i>       | 0.461                              | <i>SEPT6</i>       | 2.137                              |
| <i>SNAP29</i>      | 0.461                              | <i>LGR4</i>        | 2.138                              |
| <i>TJP1</i>        | 0.461                              | <i>WNT5B</i>       | 2.139                              |
| <i>KLHL18</i>      | 0.463                              | <i>SUOX</i>        | 2.142                              |
| <i>RANBP9</i>      | 0.463                              | <i>CA13</i>        | 2.144                              |
| <i>UPP1</i>        | 0.463                              | <i>GRSF1</i>       | 2.144                              |
| <i>DENND2C</i>     | 0.464                              | <i>TRIM47</i>      | 2.145                              |
| <i>KRT37</i>       | 0.464                              | <i>NT5DC1</i>      | 2.147                              |
| <i>PNPLA3</i>      | 0.466                              | <i>MAML2</i>       | 2.149                              |
| <i>HSD17B14</i>    | 0.467                              | <i>PARP4</i>       | 2.149                              |
| <i>GPSM1</i>       | 0.468                              | <i>DCBLD1</i>      | 2.150                              |
| <i>KIAA1632</i>    | 0.469                              | <i>PLS1</i>        | 2.161                              |
| <i>DEFB1</i>       | 0.469                              | <i>FAM117B</i>     | 2.161                              |
| <i>KIAA1370</i>    | 0.469                              | <i>TMX4</i>        | 2.166                              |
| <i>KIFC3</i>       | 0.469                              | <i>SYNC</i>        | 2.171                              |
| <i>RASSF5</i>      | 0.470                              | <i>MPP5</i>        | 2.174                              |
| <i>FNTB</i>        | 0.471                              | <i>NEFM</i>        | 2.174                              |
| <i>MGC87042</i>    | 0.471                              | <i>PFTK1</i>       | 2.175                              |
| <i>RBBP6</i>       | 0.473                              | <i>ASS1</i>        | 2.176                              |
| <i>CNTN1</i>       | 0.474                              | <i>AIMP1</i>       | 2.187                              |
| <i>NIACR2</i>      | 0.474                              | <i>CLEC7A</i>      | 2.190                              |
| <i>ANGPTL4</i>     | 0.476                              | <i>BIRC3</i>       | 2.192                              |



| <b>Gene Symbol</b> | <b>Fold Change<br/>p.Ile482Thr</b> | <b>Gene Symbol</b> | <b>Fold Change<br/>p.Ile482Thr</b> |
|--------------------|------------------------------------|--------------------|------------------------------------|
| <i>CPEB4</i>       | 0.477                              | <i>PSMB10</i>      | 2.195                              |
| <i>MUM1L1</i>      | 0.477                              | <i>HAUS6</i>       | 2.195                              |
| <i>PTPN21</i>      | 0.478                              | <i>PRR15</i>       | 2.197                              |
| <i>IL1B</i>        | 0.478                              | <i>DCBLD2</i>      | 2.198                              |
| <i>ELOVL1</i>      | 0.478                              | <i>NAPEPLD</i>     | 2.199                              |
| <i>MPPE1</i>       | 0.478                              | <i>C13orf31</i>    | 2.201                              |
| <i>PRNP</i>        | 0.479                              | <i>PITPNM3</i>     | 2.202                              |
| <i>APPL2</i>       | 0.480                              | <i>NPDC1</i>       | 2.202                              |
| <i>DOCK9</i>       | 0.481                              | <i>CCDC15</i>      | 2.202                              |
| <i>ABHD5</i>       | 0.482                              | <i>HMGN4</i>       | 2.202                              |
| <i>ZRANB1</i>      | 0.482                              | <i>DUSP10</i>      | 2.203                              |
| <i>MMP1</i>        | 0.483                              | <i>NMI</i>         | 2.203                              |
| <i>SNX21</i>       | 0.483                              | <i>MVP</i>         | 2.208                              |
| <i>PCDH21</i>      | 0.483                              | <i>LTBP3</i>       | 2.209                              |
| <i>FNIP2</i>       | 0.485                              | <i>CDC37L1</i>     | 2.211                              |
| <i>SEPT8</i>       | 0.485                              | <i>TNFSF9</i>      | 2.213                              |
| <i>IVL</i>         | 0.485                              | <i>NME7</i>        | 2.213                              |
| <i>ATG9B</i>       | 0.486                              | <i>BCAR3</i>       | 2.215                              |
| <i>SH2D5</i>       | 0.486                              | <i>C1orf85</i>     | 2.218                              |
| <i>GOLGA8A</i>     | 0.486                              | <i>PPA1</i>        | 2.223                              |
| <i>ADSSL1</i>      | 0.486                              | <i>KRIT1</i>       | 2.224                              |
| <i>APOE</i>        | 0.487                              | <i>SNX30</i>       | 2.227                              |
| <i>SLAMF7</i>      | 0.487                              | <i>TPM1</i>        | 2.229                              |
| <i>PDZD2</i>       | 0.488                              | <i>EEF1A1</i>      | 2.231                              |
| <i>HIP1R</i>       | 0.490                              | <i>DMD</i>         | 2.232                              |
| <i>RHBDL2</i>      | 0.491                              | <i>TFCP2L1</i>     | 2.233                              |
| <i>PLCXD2</i>      | 0.491                              | <i>FAM13A</i>      | 2.239                              |
| <i>LTB4R2</i>      | 0.493                              | <i>FZD10</i>       | 2.241                              |
| <i>C10orf57</i>    | 0.493                              | <i>COTL1</i>       | 2.243                              |
| <i>CYB561D1</i>    | 0.494                              | <i>RUNX1</i>       | 2.246                              |
| <i>OAF</i>         | 0.494                              | <i>MOCOS</i>       | 2.249                              |
| <i>ATP11B</i>      | 0.494                              | <i>ZBTB8A</i>      | 2.252                              |
| <i>HOOK1</i>       | 0.495                              | <i>ADSS</i>        | 2.255                              |
| <i>LOC344887</i>   | 0.495                              | <i>CDC25B</i>      | 2.256                              |
| <i>MLXIPL</i>      | 0.498                              | <i>GNG2</i>        | 2.257                              |
| <i>MAPK14</i>      | 0.498                              | <i>ACADM</i>       | 2.261                              |
| <i>DMKN</i>        | 0.498                              | <i>PHKB</i>        | 2.268                              |
| <i>PRDM1</i>       | 0.499                              | <i>CYP4B1</i>      | 2.269                              |
| <i>SEMA4D</i>      | 0.499                              | <i>CDH16</i>       | 2.269                              |
| <i>FRMPD1</i>      | 0.500                              | <i>OSGIN2</i>      | 2.271                              |
| <i>KREMEN1</i>     | 0.500                              | <i>CDT1</i>        | 2.273                              |

| <b>Gene Symbol</b>  | <b>Fold Change<br/>p.Ile482Thr</b> | <b>Gene Symbol</b>  | <b>Fold Change<br/>p.Ile482Thr</b> |
|---------------------|------------------------------------|---------------------|------------------------------------|
| <i>KLK11</i>        | 0.501                              | <i>GSK3B</i>        | 2.274                              |
| <i>C12orf29</i>     | 0.502                              | <i>BAG1</i>         | 2.282                              |
| <i>NAV3</i>         | 0.502                              | <i>CAMK2N1</i>      | 2.288                              |
| <i>PFKFB4</i>       | 0.502                              | <i>FAIM</i>         | 2.291                              |
| <i>FMO2</i>         | 0.502                              | <i>C10orf78</i>     | 2.293                              |
| <i>SLC5A10</i>      | 0.504                              | <i>TRIM2</i>        | 2.295                              |
| <i>FAM65C</i>       | 0.505                              | <i>DPYSL2</i>       | 2.302                              |
| <i>TUBG2</i>        | 0.506                              | <i>LOC100132999</i> | 2.303                              |
| <i>EVPL</i>         | 0.507                              | <i>IPO5</i>         | 2.312                              |
| <i>MGLL</i>         | 0.507                              | <i>ISL1</i>         | 2.316                              |
| <i>RDH13</i>        | 0.508                              | <i>HSD11B2</i>      | 2.321                              |
| <i>PSG5</i>         | 0.508                              | <i>SCHIP1</i>       | 2.325                              |
| <i>SLC10A3</i>      | 0.508                              | <i>RRM2B</i>        | 2.326                              |
| <i>KALRN</i>        | 0.508                              | <i>MBNL2</i>        | 2.331                              |
| <i>CHRNA3</i>       | 0.509                              | <i>TSPAN1</i>       | 2.335                              |
| <i>SAP30L</i>       | 0.509                              | <i>ITGB6</i>        | 2.336                              |
| <i>DUSP13</i>       | 0.510                              | <i>C12orf75</i>     | 2.347                              |
| <i>LOC100049716</i> | 0.510                              | <i>AKR1C3</i>       | 2.351                              |
| <i>SLC26A9</i>      | 0.511                              | <i>PICALM</i>       | 2.351                              |
| <i>SP6</i>          | 0.511                              | <i>FAM49A</i>       | 2.352                              |
| <i>NGFRAP1</i>      | 0.511                              | <i>C1orf53</i>      | 2.361                              |
| <i>BLOC1S3</i>      | 0.513                              | <i>CYB5D1</i>       | 2.365                              |
| <i>C12orf56</i>     | 0.514                              | <i>HOTAIR</i>       | 2.381                              |
| <i>FLVCR2</i>       | 0.514                              | <i>ST6GALNAC5</i>   | 2.390                              |
| <i>RPS11</i>        | 0.515                              | <i>CEACAM1</i>      | 2.391                              |
| <i>KCNK7</i>        | 0.515                              | <i>TP53</i>         | 2.395                              |
| <i>LOC643008</i>    | 0.515                              | <i>MEIS2</i>        | 2.402                              |
| <i>TUBB2A</i>       | 0.515                              | <i>TTC8</i>         | 2.402                              |
| <i>LOC284023</i>    | 0.515                              | <i>CMTM4</i>        | 2.406                              |
| <i>CLN8</i>         | 0.516                              | <i>GNAQ</i>         | 2.408                              |
| <i>CLDN1</i>        | 0.518                              | <i>RPL35A</i>       | 2.410                              |
| <i>LAD1</i>         | 0.518                              | <i>LPCAT2</i>       | 2.417                              |
| <i>GGCT</i>         | 0.518                              | <i>ST6GALNAC1</i>   | 2.417                              |
| <i>FAM83G</i>       | 0.518                              | <i>PTPLAD2</i>      | 2.422                              |
| <i>CWH43</i>        | 0.519                              | <i>GNPTAB</i>       | 2.429                              |
| <i>PSG1</i>         | 0.519                              | <i>KIAA1143</i>     | 2.431                              |
| <i>MMP10</i>        | 0.519                              | <i>GUCY1B3</i>      | 2.431                              |
| <i>FAM83C</i>       | 0.519                              | <i>LRRC16A</i>      | 2.431                              |
| <i>MAP3K8</i>       | 0.519                              | <i>CTGF</i>         | 2.432                              |
| <i>UNQ1887</i>      | 0.519                              | <i>ST3GAL1</i>      | 2.443                              |
| <i>ACAD9</i>        | 0.520                              | <i>MLPH</i>         | 2.452                              |

| <b>Gene Symbol</b> | <b>Fold Change<br/>p.Ile482Thr</b> | <b>Gene Symbol</b> | <b>Fold Change<br/>p.Ile482Thr</b> |
|--------------------|------------------------------------|--------------------|------------------------------------|
| <i>IL8RB</i>       | 0.520                              | <i>GSTT1</i>       | 2.453                              |
| <i>SAMD4B</i>      | 0.520                              | <i>TRERF1</i>      | 2.464                              |
| <i>CHST1</i>       | 0.521                              | <i>CHML</i>        | 2.468                              |
| <i>TRIM62</i>      | 0.521                              | <i>SCCPDH</i>      | 2.477                              |
| <i>PKP1</i>        | 0.521                              | <i>NSL1</i>        | 2.480                              |
| <i>ALAS1</i>       | 0.521                              | <i>LMO7</i>        | 2.483                              |
| <i>WDR53</i>       | 0.522                              | <i>GNE</i>         | 2.486                              |
| <i>LYPD3</i>       | 0.522                              | <i>BID</i>         | 2.490                              |
| <i>SH3BGRL2</i>    | 0.523                              | <i>TMEM5</i>       | 2.495                              |
| <i>HBEGF</i>       | 0.524                              | <i>LIMA1</i>       | 2.496                              |
| <i>H1FO</i>        | 0.524                              | <i>ZNF529</i>      | 2.502                              |
| <i>SERPINB12</i>   | 0.525                              | <i>RHPN2</i>       | 2.518                              |
| <i>ALS2CL</i>      | 0.525                              | <i>PPAP2C</i>      | 2.519                              |
| <i>GNAI1</i>       | 0.525                              | <i>PSMB9</i>       | 2.520                              |
| <i>C2orf54</i>     | 0.526                              | <i>OLFML3</i>      | 2.521                              |
| <i>WDFY2</i>       | 0.527                              | <i>ATL2</i>        | 2.523                              |
| <i>THRB</i>        | 0.527                              | <i>GSPT2</i>       | 2.526                              |
| <i>SQLE</i>        | 0.528                              | <i>ARL6IP5</i>     | 2.536                              |
| <i>PXMP4</i>       | 0.529                              | <i>PBX1</i>        | 2.538                              |
| <i>RAB5A</i>       | 0.530                              | <i>ST6GAL1</i>     | 2.538                              |
| <i>ZBED2</i>       | 0.530                              | <i>AHR</i>         | 2.541                              |
| <i>ZFP36</i>       | 0.530                              | <i>HES4</i>        | 2.552                              |
| <i>WBP5</i>        | 0.531                              | <i>MYO5C</i>       | 2.552                              |
| <i>COL27A1</i>     | 0.531                              | <i>FTH1</i>        | 2.576                              |
| <i>MAF</i>         | 0.531                              | <i>APOBEC3B</i>    | 2.602                              |
| <i>ANXA1</i>       | 0.532                              | <i>TFRC</i>        | 2.649                              |
| <i>PRSS22</i>      | 0.532                              | <i>NETO1</i>       | 2.661                              |
| <i>POR</i>         | 0.533                              | <i>SESN3</i>       | 2.695                              |
| <i>JHDM1D</i>      | 0.533                              | <i>PSMB8</i>       | 2.706                              |
| <i>PIK3C2B</i>     | 0.533                              | <i>TRNP1</i>       | 2.710                              |
| <i>SMPDL3A</i>     | 0.534                              | <i>SLC46A3</i>     | 2.715                              |
| <i>WDR62</i>       | 0.534                              | <i>CARD16</i>      | 2.718                              |
| <i>TMEM79</i>      | 0.534                              | <i>ZNF738</i>      | 2.727                              |
| <i>SLC27A4</i>     | 0.535                              | <i>RUNX2</i>       | 2.731                              |
| <i>PEX3</i>        | 0.536                              | <i>PKIB</i>        | 2.735                              |
| <i>SPIRE1</i>      | 0.536                              | <i>IFIT1</i>       | 2.740                              |
| <i>TMEM200A</i>    | 0.537                              | <i>KCNN4</i>       | 2.747                              |
| <i>MYO6</i>        | 0.537                              | <i>KITLG</i>       | 2.752                              |
| <i>TMEM45A</i>     | 0.537                              | <i>EMP1</i>        | 2.757                              |
| <i>NFE2L3</i>      | 0.538                              | <i>KHDRBS3</i>     | 2.758                              |
| <i>DENND2D</i>     | 0.539                              | <i>GCNT2</i>       | 2.776                              |

| <b>Gene Symbol</b> | <b>Fold Change<br/>p.Ile482Thr</b> | <b>Gene Symbol</b> | <b>Fold Change<br/>p.Ile482Thr</b> |
|--------------------|------------------------------------|--------------------|------------------------------------|
| <i>LOC402778</i>   | 0.540                              | <i>NCOA7</i>       | 2.806                              |
| <i>DIRC3</i>       | 0.541                              | <i>TGFB2</i>       | 2.814                              |
| <i>ZBTB7C</i>      | 0.541                              | <i>MUC1</i>        | 2.816                              |
| <i>CLCN5</i>       | 0.541                              | <i>FERMT2</i>      | 2.817                              |
| <i>SEMA3F</i>      | 0.541                              | <i>FAM102B</i>     | 2.838                              |
| <i>KIAA1305</i>    | 0.542                              | <i>NGEF</i>        | 2.841                              |
| <i>TTC39B</i>      | 0.542                              | <i>PTPRB</i>       | 2.845                              |
| <i>ATG16L2</i>     | 0.542                              | <i>LEMD1</i>       | 2.850                              |
| <i>SCEL</i>        | 0.543                              | <i>LXN</i>         | 2.855                              |
| <i>ERCC1</i>       | 0.544                              | <i>PRKCDBP</i>     | 2.880                              |
| <i>TMEM91</i>      | 0.544                              | <i>NIPSNAP3A</i>   | 2.908                              |
| <i>KLF4</i>        | 0.545                              | <i>VCAN</i>        | 2.910                              |
| <i>SLC24A3</i>     | 0.545                              | <i>NEDD9</i>       | 2.927                              |
| <i>NUP50</i>       | 0.545                              | <i>RARRES3</i>     | 2.958                              |
| <i>C17orf67</i>    | 0.546                              | <i>BPGM</i>        | 2.964                              |
| <i>OSBPL2</i>      | 0.547                              | <i>FAM84B</i>      | 2.965                              |
| <i>ANO4</i>        | 0.547                              | <i>IL8</i>         | 2.974                              |
| <i>LOH12CR1</i>    | 0.547                              | <i>SPINK6</i>      | 2.976                              |
| <i>ZBTB7A</i>      | 0.548                              | <i>DNER</i>        | 2.982                              |
| <i>BTG2</i>        | 0.549                              | <i>UPK1B</i>       | 2.995                              |
| <i>ABHD12B</i>     | 0.549                              | <i>LAMP3</i>       | 3.014                              |
| <i>GPR98</i>       | 0.549                              | <i>TMTC1</i>       | 3.065                              |
| <i>HIST1H2BG</i>   | 0.549                              | <i>COBL</i>        | 3.067                              |
| <i>C4orf3</i>      | 0.550                              | <i>CXCL10</i>      | 3.072                              |
| <i>MAP3K9</i>      | 0.550                              | <i>CACHD1</i>      | 3.080                              |
| <i>MAP6D1</i>      | 0.550                              | <i>PTGES</i>       | 3.080                              |
| <i>SGPP2</i>       | 0.550                              | <i>NTN4</i>        | 3.101                              |
| <i>STX12</i>       | 0.550                              | <i>CYP4F3</i>      | 3.119                              |
| <i>NRBF2</i>       | 0.550                              | <i>C6orf115</i>    | 3.137                              |
| <i>OTUD1</i>       | 0.551                              | <i>CLDN7</i>       | 3.154                              |
| <i>ATG2A</i>       | 0.551                              | <i>CBLB</i>        | 3.168                              |
| <i>STARD5</i>      | 0.551                              | <i>GCNT3</i>       | 3.205                              |
| <i>EXOC6B</i>      | 0.552                              | <i>SOX9</i>        | 3.227                              |
| <i>PFKFB2</i>      | 0.553                              | <i>ACPL2</i>       | 3.254                              |
| <i>ZNF211</i>      | 0.553                              | <i>MAMDC2</i>      | 3.285                              |
| <i>ADAMTS1</i>     | 0.553                              | <i>MMP2</i>        | 3.316                              |
| <i>PI3</i>         | 0.554                              | <i>ZNF365</i>      | 3.391                              |
| <i>NOTCH2NL</i>    | 0.554                              | <i>MFI2</i>        | 3.396                              |
| <i>RHOF</i>        | 0.555                              | <i>SRPX</i>        | 3.462                              |
| <i>SLC28A3</i>     | 0.555                              | <i>CUGBP2</i>      | 3.468                              |
| <i>CISH</i>        | 0.555                              | <i>NINJ1</i>       | 3.475                              |

| <b>Gene Symbol</b> | <b>Fold Change<br/>p.Ile482Thr</b> | <b>Gene Symbol</b> | <b>Fold Change<br/>p.Ile482Thr</b> |
|--------------------|------------------------------------|--------------------|------------------------------------|
| <i>BSPRY</i>       | 0.555                              | <i>SSPN</i>        | 3.555                              |
| <i>FBXO45</i>      | 0.556                              | <i>ID3</i>         | 3.558                              |
| <i>PLK3</i>        | 0.556                              | <i>BIK</i>         | 3.579                              |
| <i>IMPA2</i>       | 0.556                              | <i>CCND1</i>       | 3.597                              |
| <i>MTSS1</i>       | 0.556                              | <i>C9orf150</i>    | 3.614                              |
| <i>NR1D2</i>       | 1.795                              | <i>SEPP1</i>       | 3.637                              |
| <i>DCPS</i>        | 1.795                              | <i>PLA2G7</i>      | 3.699                              |
| <i>IFNAR1</i>      | 1.796                              | <i>PIK3R3</i>      | 3.717                              |
| <i>USP18</i>       | 1.796                              | <i>UCP2</i>        | 3.723                              |
| <i>TTC5</i>        | 1.796                              | <i>BAMBI</i>       | 3.734                              |
| <i>SLC39A14</i>    | 1.796                              | <i>NEFL</i>        | 3.740                              |
| <i>TMEM98</i>      | 1.797                              | <i>FNBP1L</i>      | 3.746                              |
| <i>C3orf17</i>     | 1.797                              | <i>CXCL1</i>       | 3.758                              |
| <i>PGBD3</i>       | 1.797                              | <i>CLDN8</i>       | 3.792                              |
| <i>C5orf32</i>     | 1.799                              | <i>DDAH1</i>       | 3.803                              |
| <i>MOBK2B</i>      | 1.799                              | <i>MYLK</i>        | 3.819                              |
| <i>FN1</i>         | 1.799                              | <i>PHACTR3</i>     | 3.847                              |
| <i>REEP5</i>       | 1.799                              | <i>CDKN2B</i>      | 3.895                              |
| <i>ZFH3</i>        | 1.800                              | <i>EPS8</i>        | 3.991                              |
| <i>LOC389203</i>   | 1.800                              | <i>TNS3</i>        | 4.003                              |
| <i>SOS2</i>        | 1.801                              | <i>KRT8</i>        | 4.010                              |
| <i>BRCC3</i>       | 1.801                              | <i>HS3ST1</i>      | 4.028                              |
| <i>PALM2-AKAP2</i> | 1.802                              | <i>KRT15</i>       | 4.090                              |
| <i>UBR2</i>        | 1.802                              | <i>KRT24</i>       | 4.093                              |
| <i>LARP6</i>       | 1.804                              | <i>SPON2</i>       | 4.203                              |
| <i>CEACAM5</i>     | 1.804                              | <i>CMPK2</i>       | 4.260                              |
| <i>RAP2A</i>       | 1.804                              | <i>IGFL1</i>       | 4.297                              |
| <i>AGAP1</i>       | 1.807                              | <i>OVOL2</i>       | 4.346                              |
| <i>COL13A1</i>     | 1.807                              | <i>MSLN</i>        | 4.475                              |
| <i>TCF7L2</i>      | 1.807                              | <i>DPP4</i>        | 4.512                              |
| <i>LOC401074</i>   | 1.808                              | <i>GABRA2</i>      | 4.550                              |
| <i>ANAPC10</i>     | 1.808                              | <i>HRASLS2</i>     | 4.592                              |
| <i>SGOL2</i>       | 1.808                              | <i>ITGB8</i>       | 4.636                              |
| <i>KIAA0240</i>    | 1.809                              | <i>IGFBP3</i>      | 4.876                              |
| <i>FBXW5</i>       | 1.809                              | <i>COX7A1</i>      | 5.004                              |
| <i>LRAT</i>        | 1.810                              | <i>PLA2G16</i>     | 5.046                              |
| <i>GTPBP8</i>      | 1.811                              | <i>KLRG2</i>       | 5.109                              |
| <i>C5orf26</i>     | 1.811                              | <i>DKK1</i>        | 5.157                              |
| <i>TFAP2E</i>      | 1.812                              | <i>MAL</i>         | 5.160                              |
| <i>RMND1</i>       | 1.813                              | <i>RARRES1</i>     | 5.596                              |
| <i>ARHGAP18</i>    | 1.813                              | <i>DAPK1</i>       | 5.893                              |

| <b>Gene Symbol</b> | <b>Fold Change<br/>p.Ile482Thr</b> | <b>Gene Symbol</b>  | <b>Fold Change<br/>p.Ile482Thr</b> |
|--------------------|------------------------------------|---------------------|------------------------------------|
| <i>TTF2</i>        | 1.813                              | <i>DIRAS3</i>       | 6.282                              |
| <i>OSGEPL1</i>     | 1.814                              | <i>GAS1</i>         | 6.392                              |
| <i>PRPF19</i>      | 1.814                              | <i>CCNA1</i>        | 6.917                              |
| <i>WDR36</i>       | 1.817                              | <i>NTS</i>          | 7.016                              |
| <i>ZNF827</i>      | 1.817                              | <i>S100A4</i>       | 7.038                              |
| <i>QKI</i>         | 1.817                              | <i>ALDH1A1</i>      | 7.100                              |
| <i>ZZZ3</i>        | 1.818                              | <i>CSGALNACT1</i>   | 7.118                              |
| <i>TP53INP1</i>    | 1.819                              | <i>LOC100131138</i> | 7.676                              |
| <i>MYO5B</i>       | 1.820                              | <i>IL15</i>         | 8.471                              |
| <i>CDKN2A</i>      | 1.820                              | <i>SERPINA3</i>     | 8.519                              |
| <i>RRM2</i>        | 1.820                              | <i>KANK4</i>        | 8.719                              |
| <i>FCRLB</i>       | 1.820                              | <i>EPCAM</i>        | 8.758                              |
| <i>GSTCD</i>       | 1.821                              | <i>KRT7</i>         | 9.860                              |
| <i>DAZAP2</i>      | 1.821                              | <i>SLC39A8</i>      | 10.319                             |
| <i>CCDC127</i>     | 1.821                              | <i>SYTL5</i>        | 10.892                             |
| <i>NHEDC2</i>      | 1.822                              | <i>S100P</i>        | 14.267                             |
| <i>PHF17</i>       | 1.822                              | <i>CYP1B1</i>       | 16.547                             |
| <i>ZNF627</i>      | 1.822                              | <i>KRT4</i>         | 16.984                             |
| <i>PLEKHA7</i>     | 1.823                              | <i>KRT19</i>        | 17.432                             |
| <i>DDX58</i>       | 1.823                              | <i>GPRC5A</i>       | 19.889                             |
| <i>DPH5</i>        | 1.823                              |                     |                                    |

**Table S3. Genes that Are Induced or Repressed 1.8× or More in p.Arg500Pro versus Wild-type Organotypic Cultures**

| <b>Gene Symbol</b> | <b>Fold Change<br/>p.Arg500Pro</b> | <b>Gene Symbol</b> | <b>Fold Change<br/>p.Arg500Pro</b> |
|--------------------|------------------------------------|--------------------|------------------------------------|
| <i>ARG1</i>        | 0.005                              | <i>DIRC3</i>       | 0.521                              |
| <i>LOR</i>         | 0.009                              | <i>PTPN22</i>      | 0.522                              |
| <i>LCE2B</i>       | 0.011                              | <i>NLRX1</i>       | 0.522                              |
| <i>SPRR2G</i>      | 0.017                              | <i>TTC39B</i>      | 0.522                              |
| <i>HAL</i>         | 0.018                              | <i>KIAA1370</i>    | 0.523                              |
| <i>LCE3D</i>       | 0.019                              | <i>TMEM45A</i>     | 0.523                              |
| <i>LCE1B</i>       | 0.020                              | <i>PSG4</i>        | 0.523                              |
| <i>ASPRV1</i>      | 0.025                              | <i>SERPINB13</i>   | 0.524                              |
| <i>FLG2</i>        | 0.026                              | <i>KIAA1632</i>    | 0.524                              |
| <i>RPTN</i>        | 0.027                              | <i>ACAD8</i>       | 0.525                              |
| <i>RNASE7</i>      | 0.029                              | <i>SH3BGRL2</i>    | 0.525                              |
| <i>ELMOD1</i>      | 0.044                              | <i>FBXL20</i>      | 0.526                              |
| <i>CRCT1</i>       | 0.044                              | <i>PLK3</i>        | 0.527                              |
| <i>C1orf46</i>     | 0.045                              | <i>LOH12CR1</i>    | 0.527                              |
| <i>AADAACL2</i>    | 0.046                              | <i>SLC31A1</i>     | 0.528                              |
| <i>WFDC12</i>      | 0.048                              | <i>C4orf3</i>      | 0.528                              |
| <i>CALML3</i>      | 0.053                              | <i>C10orf57</i>    | 0.529                              |
| <i>S100A12</i>     | 0.055                              | <i>RBP1</i>        | 0.529                              |
| <i>DSC1</i>        | 0.057                              | <i>KIFC3</i>       | 0.529                              |
| <i>BLMH</i>        | 0.057                              | <i>CA12</i>        | 0.530                              |
| <i>DHRS9</i>       | 0.059                              | <i>BICD2</i>       | 0.531                              |
| <i>WFDC5</i>       | 0.070                              | <i>H19</i>         | 0.533                              |
| <i>HPGD</i>        | 0.070                              | <i>VNN3</i>        | 0.534                              |
| <i>HMOX1</i>       | 0.073                              | <i>RAB11FIP1</i>   | 0.536                              |
| <i>LYPD5</i>       | 0.075                              | <i>ATG2A</i>       | 0.536                              |
| <i>OASL</i>        | 0.077                              | <i>GCOM1</i>       | 0.536                              |
| <i>SDR9C7</i>      | 0.080                              | <i>SOX11</i>       | 0.537                              |
| <i>AZGP1</i>       | 0.081                              | <i>KDM3A</i>       | 0.537                              |
| <i>KRT9</i>        | 0.081                              | <i>SH2D2A</i>      | 0.537                              |
| <i>IL1F9</i>       | 0.083                              | <i>IL1RN</i>       | 0.538                              |
| <i>RORA</i>        | 0.086                              | <i>FNDC4</i>       | 0.539                              |
| <i>ALOX12B</i>     | 0.087                              | <i>MED8</i>        | 0.539                              |
| <i>LCE1E</i>       | 0.088                              | <i>DUOX1</i>       | 0.539                              |
| <i>ATP6V1C2</i>    | 0.088                              | <i>ZNF750</i>      | 0.539                              |
| <i>GLRX</i>        | 0.092                              | <i>IVL</i>         | 0.540                              |
| <i>DAPL1</i>       | 0.096                              | <i>UBE2J1</i>      | 0.541                              |
| <i>CDSN</i>        | 0.096                              | <i>HIST1H4B</i>    | 0.541                              |
| <i>CYP4F22</i>     | 0.096                              | <i>TGFA</i>        | 0.542                              |
| <i>C10orf99</i>    | 0.099                              | <i>LOC728431</i>   | 0.542                              |
| <i>BPIL2</i>       | 0.106                              | <i>SAP30L</i>      | 0.542                              |
| <i>HPSE</i>        | 0.107                              | <i>PLCD4</i>       | 0.542                              |
| <i>SPRR3</i>       | 0.108                              | <i>TCP11L2</i>     | 0.542                              |
| <i>ANXA9</i>       | 0.111                              | <i>SLC39A2</i>     | 0.543                              |
| <i>SPRR4</i>       | 0.112                              | <i>RGS20</i>       | 0.544                              |
| <i>CST6</i>        | 0.114                              | <i>DDHD1</i>       | 0.544                              |
| <i>CIDEA</i>       | 0.121                              | <i>RAB5A</i>       | 0.544                              |
| <i>SERPINA12</i>   | 0.122                              | <i>AHNAK</i>       | 0.544                              |

| <b>Gene Symbol</b> | <b>Fold Change<br/>p.Arg500Pro</b> | <b>Gene Symbol</b> | <b>Fold Change<br/>p.Arg500Pro</b> |
|--------------------|------------------------------------|--------------------|------------------------------------|
| <i>KRT2</i>        | 0.123                              | <i>STX12</i>       | 0.545                              |
| <i>TGM5</i>        | 0.125                              | <i>SLC10A3</i>     | 0.545                              |
| <i>CNFN</i>        | 0.125                              | <i>ZFP36</i>       | 0.547                              |
| <i>ATP10B</i>      | 0.127                              | <i>CLDN1</i>       | 0.548                              |
| <i>TGM3</i>        | 0.128                              | <i>DUSP7</i>       | 0.548                              |
| <i>CPM</i>         | 0.129                              | <i>CLCN5</i>       | 0.548                              |
| <i>RDH12</i>       | 0.133                              | <i>PGBD5</i>       | 0.549                              |
| <i>ALOXE3</i>      | 0.137                              | <i>C9orf16</i>     | 0.549                              |
| <i>KRT23</i>       | 0.137                              | <i>GDA</i>         | 0.549                              |
| <i>MFAP3L</i>      | 0.138                              | <i>SLPI</i>        | 0.550                              |
| <i>IL1F5</i>       | 0.138                              | <i>SOX2</i>        | 0.550                              |
| <i>IL1R2</i>       | 0.138                              | <i>APOE</i>        | 0.551                              |
| <i>SLC5A1</i>      | 0.138                              | <i>CHAC1</i>       | 0.553                              |
| <i>LRMP</i>        | 0.139                              | <i>GOLGA7B</i>     | 0.553                              |
| <i>KLK6</i>        | 0.140                              | <i>MX11</i>        | 0.554                              |
| <i>RFTN1</i>       | 0.140                              | <i>PCYOX1L</i>     | 0.554                              |
| <i>TREX2</i>       | 0.140                              | <i>ELL2</i>        | 0.554                              |
| <i>MARCH3</i>      | 0.140                              | <i>GPR98</i>       | 0.555                              |
| <i>ARG2</i>        | 0.142                              | <i>PCDH21</i>      | 0.556                              |
| <i>CRNN</i>        | 0.142                              | <i>NEBL</i>        | 1.795                              |
| <i>ADAP2</i>       | 0.143                              | <i>GRSF1</i>       | 1.797                              |
| <i>CASP14</i>      | 0.143                              | <i>EIF4A1</i>      | 1.797                              |
| <i>FLG</i>         | 0.143                              | <i>HNRNPL</i>      | 1.797                              |
| <i>RNF39</i>       | 0.145                              | <i>FADS2</i>       | 1.798                              |
| <i>C15orf48</i>    | 0.147                              | <i>AMOTL2</i>      | 1.799                              |
| <i>SLCO2A1</i>     | 0.149                              | <i>IL27RA</i>      | 1.799                              |
| <i>CTSH</i>        | 0.151                              | <i>CABC1</i>       | 1.800                              |
| <i>KLK13</i>       | 0.156                              | <i>SLC25A37</i>    | 1.800                              |
| <i>FCHSD1</i>      | 0.157                              | <i>REEP5</i>       | 1.800                              |
| <i>DIO2</i>        | 0.163                              | <i>AUH</i>         | 1.800                              |
| <i>HSPB8</i>       | 0.164                              | <i>LOC93622</i>    | 1.801                              |
| <i>SMPD3</i>       | 0.166                              | <i>ZNF362</i>      | 1.801                              |
| <i>LY6G6C</i>      | 0.167                              | <i>PPP3CA</i>      | 1.801                              |
| <i>PTGER3</i>      | 0.169                              | <i>SMAD1</i>       | 1.801                              |
| <i>AQP9</i>        | 0.170                              | <i>PRPF4B</i>      | 1.802                              |
| <i>FABP7</i>       | 0.171                              | <i>THBS1</i>       | 1.802                              |
| <i>ACER1</i>       | 0.171                              | <i>TP53</i>        | 1.803                              |
| <i>KCTD4</i>       | 0.175                              | <i>MIB1</i>        | 1.803                              |
| <i>SLC46A2</i>     | 0.176                              | <i>CYorf15B</i>    | 1.805                              |
| <i>PSAPL1</i>      | 0.182                              | <i>PDHA1</i>       | 1.805                              |
| <i>CRYAB</i>       | 0.184                              | <i>C19orf21</i>    | 1.807                              |
| <i>GPX3</i>        | 0.184                              | <i>NHS</i>         | 1.807                              |
| <i>BCHE</i>        | 0.186                              | <i>UBAP2L</i>      | 1.809                              |
| <i>OTUB2</i>       | 0.189                              | <i>NT5DC1</i>      | 1.811                              |
| <i>IL1F10</i>      | 0.197                              | <i>CCNG2</i>       | 1.812                              |
| <i>DUSP1</i>       | 0.198                              | <i>SPSB1</i>       | 1.813                              |
| <i>CALB2</i>       | 0.201                              | <i>MTPAP</i>       | 1.814                              |
| <i>NMU</i>         | 0.202                              | <i>PCNX</i>        | 1.815                              |
| <i>ARRDC4</i>      | 0.204                              | <i>NOTCH1</i>      | 1.815                              |
| <i>NELL2</i>       | 0.208                              | <i>ZNF600</i>      | 1.816                              |
| <i>DGAT2</i>       | 0.210                              | <i>PITPNM3</i>     | 1.818                              |
| <i>ARL5A</i>       | 0.210                              | <i>ZFP64</i>       | 1.818                              |



| <b>Gene Symbol</b>  | <b>Fold Change<br/>p.Arg500Pro</b> | <b>Gene Symbol</b> | <b>Fold Change<br/>p.Arg500Pro</b> |
|---------------------|------------------------------------|--------------------|------------------------------------|
| <i>RBP7</i>         | 0.214                              | <i>CROCCL1</i>     | 1.823                              |
| <i>SLC16A10</i>     | 0.219                              | <i>GORAB</i>       | 1.824                              |
| <i>USP2</i>         | 0.219                              | <i>PROM2</i>       | 1.824                              |
| <i>KRT34</i>        | 0.225                              | <i>RRM2B</i>       | 1.825                              |
| <i>CALML5</i>       | 0.227                              | <i>KLF9</i>        | 1.825                              |
| <i>PLBD1</i>        | 0.228                              | <i>MTAP</i>        | 1.826                              |
| <i>PSORS1C2</i>     | 0.228                              | <i>CCDC127</i>     | 1.828                              |
| <i>LASS3</i>        | 0.229                              | <i>CHST3</i>       | 1.829                              |
| <i>LOC147645</i>    | 0.230                              | <i>PTPLB</i>       | 1.830                              |
| <i>C5orf46</i>      | 0.232                              | <i>PIM3</i>        | 1.830                              |
| <i>GBP6</i>         | 0.232                              | <i>CD46</i>        | 1.831                              |
| <i>BNIP3</i>        | 0.235                              | <i>NSL1</i>        | 1.832                              |
| <i>NDRG4</i>        | 0.235                              | <i>ANK3</i>        | 1.834                              |
| <i>ALOX12</i>       | 0.235                              | <i>KIF20A</i>      | 1.835                              |
| <i>YOD1</i>         | 0.236                              | <i>SCCPDH</i>      | 1.835                              |
| <i>TGM1</i>         | 0.237                              | <i>PACSIN3</i>     | 1.835                              |
| <i>OVOL1</i>        | 0.237                              | <i>TNFRSF10B</i>   | 1.837                              |
| <i>KRT1</i>         | 0.239                              | <i>TIMP1</i>       | 1.838                              |
| <i>SLC15A1</i>      | 0.241                              | <i>DST</i>         | 1.838                              |
| <i>KRT78</i>        | 0.243                              | <i>ZNF238</i>      | 1.843                              |
| <i>SBSN</i>         | 0.243                              | <i>C16orf5</i>     | 1.844                              |
| <i>LOC283404</i>    | 0.246                              | <i>SHROOM3</i>     | 1.844                              |
| <i>RAET1E</i>       | 0.249                              | <i>CHCHD7</i>      | 1.845                              |
| <i>SOX7</i>         | 0.250                              | <i>MARVELD3</i>    | 1.847                              |
| <i>EGR3</i>         | 0.250                              | <i>ZNF862</i>      | 1.848                              |
| <i>DEGS2</i>        | 0.252                              | <i>PM20D2</i>      | 1.850                              |
| <i>FILIP1L</i>      | 0.253                              | <i>ANXA11</i>      | 1.852                              |
| <i>SPNS2</i>        | 0.255                              | <i>PRKX</i>        | 1.852                              |
| <i>PDZK1IP1</i>     | 0.257                              | <i>TAPT1</i>       | 1.853                              |
| <i>HSD11B1</i>      | 0.257                              | <i>GSR</i>         | 1.856                              |
| <i>CSNK2A2</i>      | 0.258                              | <i>INSR</i>        | 1.858                              |
| <i>CEBPA</i>        | 0.265                              | <i>CDC42BPA</i>    | 1.858                              |
| <i>ACSBG1</i>       | 0.265                              | <i>ERLIN2</i>      | 1.859                              |
| <i>QPCT</i>         | 0.268                              | <i>SH3BGRL</i>     | 1.859                              |
| <i>HYAL4</i>        | 0.270                              | <i>ATP11A</i>      | 1.864                              |
| <i>KRT77</i>        | 0.270                              | <i>FAS</i>         | 1.869                              |
| <i>BBOX1</i>        | 0.270                              | <i>KRT18</i>       | 1.869                              |
| <i>FAM43A</i>       | 0.270                              | <i>BRWD2</i>       | 1.869                              |
| <i>MLLT11</i>       | 0.272                              | <i>SLC25A16</i>    | 1.872                              |
| <i>DLX5</i>         | 0.272                              | <i>DCAF16</i>      | 1.873                              |
| <i>RCAN1</i>        | 0.277                              | <i>GATAD2A</i>     | 1.873                              |
| <i>IDE</i>          | 0.278                              | <i>ATAD4</i>       | 1.873                              |
| <i>NLRP10</i>       | 0.280                              | <i>PRKAG2</i>      | 1.876                              |
| <i>PCSK6</i>        | 0.282                              | <i>KIAA0528</i>    | 1.880                              |
| <i>TXNIP</i>        | 0.282                              | <i>TBC1D24</i>     | 1.881                              |
| <i>C1orf68</i>      | 0.283                              | <i>RPS15A</i>      | 1.881                              |
| <i>EPHB6</i>        | 0.285                              | <i>RBM6</i>        | 1.882                              |
| <i>TMEM86A</i>      | 0.286                              | <i>PSME4</i>       | 1.882                              |
| <i>STXBP6</i>       | 0.286                              | <i>PTPRM</i>       | 1.885                              |
| <i>PNPLA1</i>       | 0.286                              | <i>EPPK1</i>       | 1.886                              |
| <i>CARD18</i>       | 0.288                              | <i>NTS</i>         | 1.887                              |
| <i>LOC100130476</i> | 0.289                              | <i>HES4</i>        | 1.888                              |

| <b>Gene Symbol</b> | <b>Fold Change<br/>p.Arg500Pro</b> | <b>Gene Symbol</b> | <b>Fold Change<br/>p.Arg500Pro</b> |
|--------------------|------------------------------------|--------------------|------------------------------------|
| <i>PLA2G3</i>      | 0.291                              | <i>FAM3C</i>       | 1.889                              |
| <i>HS3ST6</i>      | 0.291                              | <i>AGRN</i>        | 1.895                              |
| <i>SDR16C5</i>     | 0.291                              | <i>FOXQ1</i>       | 1.895                              |
| <i>ELOVL4</i>      | 0.291                              | <i>PHKB</i>        | 1.899                              |
| <i>TMEM40</i>      | 0.292                              | <i>OSBPL3</i>      | 1.901                              |
| <i>PTGS2</i>       | 0.293                              | <i>CSAD</i>        | 1.902                              |
| <i>ANKRD22</i>     | 0.293                              | <i>C19orf2</i>     | 1.902                              |
| <i>MMP10</i>       | 0.294                              | <i>COTL1</i>       | 1.902                              |
| <i>SLCO4A1</i>     | 0.299                              | <i>C13orf31</i>    | 1.903                              |
| <i>GAS7</i>        | 0.300                              | <i>CLIC4</i>       | 1.903                              |
| <i>HOPX</i>        | 0.301                              | <i>ANKRD10</i>     | 1.904                              |
| <i>CHRNA9</i>      | 0.303                              | <i>TAP2</i>        | 1.904                              |
| <i>RGS2</i>        | 0.303                              | <i>ELL3</i>        | 1.905                              |
| <i>GLTP</i>        | 0.304                              | <i>KIAA0746</i>    | 1.905                              |
| <i>FRY</i>         | 0.305                              | <i>BID</i>         | 1.905                              |
| <i>SLURP1</i>      | 0.306                              | <i>TTC8</i>        | 1.907                              |
| <i>ABCA12</i>      | 0.307                              | <i>ATP11C</i>      | 1.907                              |
| <i>AVPI1</i>       | 0.307                              | <i>PCBP2</i>       | 1.907                              |
| <i>MID2</i>        | 0.309                              | <i>HAUS6</i>       | 1.907                              |
| <i>NFATC2</i>      | 0.309                              | <i>MED31</i>       | 1.907                              |
| <i>NDUFA4L2</i>    | 0.310                              | <i>C1GALT1C1</i>   | 1.909                              |
| <i>SLC19A3</i>     | 0.310                              | <i>FAM102B</i>     | 1.911                              |
| <i>NEB</i>         | 0.312                              | <i>NAPEPLD</i>     | 1.912                              |
| <i>DEFB4</i>       | 0.313                              | <i>RBM39</i>       | 1.912                              |
| <i>POF1B</i>       | 0.316                              | <i>PHKA1</i>       | 1.912                              |
| <i>ABCG1</i>       | 0.316                              | <i>FKTN</i>        | 1.913                              |
| <i>VASN</i>        | 0.316                              | <i>MAGI3</i>       | 1.913                              |
| <i>hCG_1817306</i> | 0.316                              | <i>C13orf23</i>    | 1.916                              |
| <i>CITED2</i>      | 0.319                              | <i>AVL9</i>        | 1.917                              |
| <i>LASS4</i>       | 0.324                              | <i>PRRG1</i>       | 1.917                              |
| <i>FAM89A</i>      | 0.325                              | <i>LRIG2</i>       | 1.918                              |
| <i>PRSS27</i>      | 0.330                              | <i>KIAA0562</i>    | 1.919                              |
| <i>EGLN3</i>       | 0.332                              | <i>SNX13</i>       | 1.920                              |
| <i>ELOVL7</i>      | 0.334                              | <i>PICALM</i>      | 1.922                              |
| <i>LOC645638</i>   | 0.335                              | <i>CARD16</i>      | 1.923                              |
| <i>KRT31</i>       | 0.338                              | <i>KDSR</i>        | 1.923                              |
| <i>SPTLC3</i>      | 0.340                              | <i>SH3RF1</i>      | 1.924                              |
| <i>CD36</i>        | 0.341                              | <i>ATL2</i>        | 1.927                              |
| <i>TST</i>         | 0.342                              | <i>SFRS18</i>      | 1.930                              |
| <i>IL1B</i>        | 0.342                              | <i>SLC22A5</i>     | 1.930                              |
| <i>DNASE1L2</i>    | 0.344                              | <i>TP53INP1</i>    | 1.933                              |
| <i>GJB6</i>        | 0.344                              | <i>FLNB</i>        | 1.934                              |
| <i>MPZL3</i>       | 0.348                              | <i>LOC153346</i>   | 1.936                              |
| <i>UPP1</i>        | 0.349                              | <i>GALNT6</i>      | 1.938                              |
| <i>PLXDC2</i>      | 0.349                              | <i>SGK1</i>        | 1.943                              |
| <i>PYDC1</i>       | 0.349                              | <i>ETV6</i>        | 1.945                              |
| <i>PGF</i>         | 0.352                              | <i>ZNF638</i>      | 1.949                              |
| <i>PIM1</i>        | 0.352                              | <i>EPB41L4A</i>    | 1.950                              |
| <i>PRDM1</i>       | 0.353                              | <i>UBR2</i>        | 1.952                              |
| <i>AMDHD1</i>      | 0.353                              | <i>ZNF512B</i>     | 1.952                              |
| <i>RUNDC3A</i>     | 0.357                              | <i>IPO5</i>        | 1.954                              |
| <i>CTSD</i>        | 0.358                              | <i>ZNF33A</i>      | 1.958                              |

| <b>Gene Symbol</b> | <b>Fold Change<br/>p.Arg500Pro</b> | <b>Gene Symbol</b> | <b>Fold Change<br/>p.Arg500Pro</b> |
|--------------------|------------------------------------|--------------------|------------------------------------|
| <i>GPT2</i>        | 0.358                              | <i>LTBP3</i>       | 1.959                              |
| <i>GRHL1</i>       | 0.359                              | <i>AKAP1</i>       | 1.959                              |
| <i>TPRG1</i>       | 0.359                              | <i>TMEM106B</i>    | 1.959                              |
| <i>MUC15</i>       | 0.359                              | <i>SCRIB</i>       | 1.959                              |
| <i>DNAJB5</i>      | 0.359                              | <i>CDC25B</i>      | 1.963                              |
| <i>ATP2C2</i>      | 0.360                              | <i>LRRC16A</i>     | 1.963                              |
| <i>GBAP</i>        | 0.362                              | <i>TMEM129</i>     | 1.963                              |
| <i>DUSP14</i>      | 0.364                              | <i>SREBF1</i>      | 1.965                              |
| <i>IFFO2</i>       | 0.364                              | <i>ATR</i>         | 1.965                              |
| <i>APPL2</i>       | 0.364                              | <i>EEF2K</i>       | 1.966                              |
| <i>MCAM</i>        | 0.364                              | <i>FUSIP1</i>      | 1.969                              |
| <i>MXD1</i>        | 0.364                              | <i>NIPAL3</i>      | 1.974                              |
| <i>ZNF107</i>      | 0.365                              | <i>PALM2-AKAP2</i> | 1.975                              |
| <i>SCNN1B</i>      | 0.366                              | <i>FAR1</i>        | 1.976                              |
| <i>IL1F7</i>       | 0.367                              | <i>DAG1</i>        | 1.976                              |
| <i>HSPC159</i>     | 0.367                              | <i>NCRNA00201</i>  | 1.977                              |
| <i>MAPK14</i>      | 0.367                              | <i>PRPF38B</i>     | 1.977                              |
| <i>PAQR5</i>       | 0.368                              | <i>CD55</i>        | 1.979                              |
| <i>TMPRSS11D</i>   | 0.370                              | <i>MACC1</i>       | 1.983                              |
| <i>RASGRP1</i>     | 0.371                              | <i>FAM179B</i>     | 1.985                              |
| <i>UBR4</i>        | 0.371                              | <i>INPP4A</i>      | 1.987                              |
| <i>HK2</i>         | 0.373                              | <i>FAM13B</i>      | 1.989                              |
| <i>NIPAL4</i>      | 0.374                              | <i>CYB5D1</i>      | 1.991                              |
| <i>TNNT2</i>       | 0.374                              | <i>SDC4</i>        | 1.996                              |
| <i>KCTD11</i>      | 0.375                              | <i>NEK4</i>        | 1.996                              |
| <i>PDPN</i>        | 0.376                              | <i>POLH</i>        | 1.999                              |
| <i>EXPH5</i>       | 0.376                              | <i>ZCCHC7</i>      | 2.001                              |
| <i>PTPN21</i>      | 0.377                              | <i>PARP4</i>       | 2.006                              |
| <i>TTC39A</i>      | 0.378                              | <i>KIAA1143</i>    | 2.013                              |
| <i>KLHL18</i>      | 0.378                              | <i>ATP8B1</i>      | 2.014                              |
| <i>PSG7</i>        | 0.382                              | <i>PPPDE1</i>      | 2.015                              |
| <i>DUOXA1</i>      | 0.382                              | <i>SUOX</i>        | 2.015                              |
| <i>GRAMD1C</i>     | 0.383                              | <i>MBNL1</i>       | 2.018                              |
| <i>PPIF</i>        | 0.384                              | <i>LTBP2</i>       | 2.020                              |
| <i>ABCG4</i>       | 0.384                              | <i>ACP6</i>        | 2.023                              |
| <i>NAV3</i>        | 0.386                              | <i>PYGB</i>        | 2.024                              |
| <i>XKRX</i>        | 0.386                              | <i>ZCCHC2</i>      | 2.027                              |
| <i>FGD2</i>        | 0.387                              | <i>GSTT1</i>       | 2.028                              |
| <i>SLC31A2</i>     | 0.387                              | <i>CSTF3</i>       | 2.031                              |
| <i>FGD3</i>        | 0.387                              | <i>GOLM1</i>       | 2.031                              |
| <i>SLAMF7</i>      | 0.388                              | <i>FUBP1</i>       | 2.032                              |
| <i>KLK12</i>       | 0.391                              | <i>C7orf44</i>     | 2.032                              |
| <i>SERPINB9</i>    | 0.391                              | <i>POLR3E</i>      | 2.035                              |
| <i>HOMER2</i>      | 0.391                              | <i>FOXC1</i>       | 2.053                              |
| <i>CCDC90A</i>     | 0.392                              | <i>STEAP3</i>      | 2.054                              |
| <i>CAMK1D</i>      | 0.393                              | <i>LGR4</i>        | 2.056                              |
| <i>IL22RA1</i>     | 0.394                              | <i>TNRC6B</i>      | 2.057                              |
| <i>PLIN2</i>       | 0.395                              | <i>ZNF738</i>      | 2.063                              |
| <i>KIAA0513</i>    | 0.396                              | <i>ANLN</i>        | 2.069                              |
| <i>IL1F8</i>       | 0.402                              | <i>RBM3</i>        | 2.069                              |
| <i>PRCP</i>        | 0.402                              | <i>LPCAT2</i>      | 2.077                              |
| <i>ZBED2</i>       | 0.403                              | <i>PPA2</i>        | 2.080                              |

| <b>Gene Symbol</b>  | <b>Fold Change<br/>p.Arg500Pro</b> | <b>Gene Symbol</b> | <b>Fold Change<br/>p.Arg500Pro</b> |
|---------------------|------------------------------------|--------------------|------------------------------------|
| <i>FAM65C</i>       | 0.404                              | <i>MGST1</i>       | 2.081                              |
| <i>SNAP29</i>       | 0.405                              | <i>CBX3</i>        | 2.085                              |
| <i>PLCXD1</i>       | 0.405                              | <i>AKR1B10</i>     | 2.085                              |
| <i>NPR2</i>         | 0.406                              | <i>SEPP1</i>       | 2.086                              |
| <i>TP53INP2</i>     | 0.406                              | <i>TNFSF9</i>      | 2.090                              |
| <i>SLC5A10</i>      | 0.407                              | <i>FAM13A</i>      | 2.093                              |
| <i>MBD1</i>         | 0.407                              | <i>MVP</i>         | 2.099                              |
| <i>CARD14</i>       | 0.407                              | <i>AHSA2</i>       | 2.101                              |
| <i>PRNP</i>         | 0.410                              | <i>PLEKHA7</i>     | 2.110                              |
| <i>BDNF</i>         | 0.410                              | <i>AHR</i>         | 2.111                              |
| <i>APOBEC3A</i>     | 0.412                              | <i>ZNF703</i>      | 2.112                              |
| <i>LRRC20</i>       | 0.412                              | <i>IQCE</i>        | 2.113                              |
| <i>SLC37A2</i>      | 0.414                              | <i>VPS13C</i>      | 2.113                              |
| <i>LYNX1</i>        | 0.414                              | <i>LIF</i>         | 2.120                              |
| <i>ZNF91</i>        | 0.414                              | <i>SLC35A3</i>     | 2.124                              |
| <i>FMO2</i>         | 0.415                              | <i>CYLD</i>        | 2.125                              |
| <i>DOCK9</i>        | 0.415                              | <i>SYTL2</i>       | 2.127                              |
| <i>ESYT3</i>        | 0.416                              | <i>RNASET2</i>     | 2.141                              |
| <i>EML1</i>         | 0.416                              | <i>C11orf80</i>    | 2.143                              |
| <i>GPLD1</i>        | 0.417                              | <i>ANXA4</i>       | 2.143                              |
| <i>KRT80</i>        | 0.418                              | <i>BAG1</i>        | 2.144                              |
| <i>CHP2</i>         | 0.419                              | <i>PHACTR3</i>     | 2.144                              |
| <i>LOC729994</i>    | 0.422                              | <i>ZNRF3</i>       | 2.154                              |
| <i>UGCG</i>         | 0.423                              | <i>TPM1</i>        | 2.155                              |
| <i>MAP2</i>         | 0.424                              | <i>ARL6IP5</i>     | 2.155                              |
| <i>CALN1</i>        | 0.425                              | <i>SRPX</i>        | 2.166                              |
| <i>BLVRB</i>        | 0.426                              | <i>SULT1E1</i>     | 2.167                              |
| <i>PPP4R4</i>       | 0.427                              | <i>RNF207</i>      | 2.168                              |
| <i>GGCT</i>         | 0.428                              | <i>ENTPD6</i>      | 2.169                              |
| <i>LOC283070</i>    | 0.428                              | <i>SNX30</i>       | 2.176                              |
| <i>ANGPTL4</i>      | 0.429                              | <i>TRERF1</i>      | 2.178                              |
| <i>PAQR7</i>        | 0.429                              | <i>STEAP4</i>      | 2.180                              |
| <i>LGALS8</i>       | 0.429                              | <i>LOC203274</i>   | 2.180                              |
| <i>NIACR2</i>       | 0.430                              | <i>CCDC14</i>      | 2.186                              |
| <i>MAP1LC3A</i>     | 0.430                              | <i>EEF1A1</i>      | 2.187                              |
| <i>FHDC1</i>        | 0.431                              | <i>CHML</i>        | 2.191                              |
| <i>C15orf59</i>     | 0.431                              | <i>LOC283875</i>   | 2.191                              |
| <i>SORT1</i>        | 0.432                              | <i>ARHGAP18</i>    | 2.195                              |
| <i>SRPK1</i>        | 0.432                              | <i>RARRES3</i>     | 2.196                              |
| <i>LOC284023</i>    | 0.433                              | <i>DGKQ</i>        | 2.197                              |
| <i>GGH</i>          | 0.433                              | <i>ABAT</i>        | 2.203                              |
| <i>C9orf169</i>     | 0.434                              | <i>PPAP2C</i>      | 2.204                              |
| <i>EPHX3</i>        | 0.434                              | <i>MXRA5</i>       | 2.206                              |
| <i>PPARD</i>        | 0.435                              | <i>CLEC7A</i>      | 2.208                              |
| <i>NFE2L3</i>       | 0.436                              | <i>ELF3</i>        | 2.211                              |
| <i>MMP1</i>         | 0.437                              | <i>PSAT1</i>       | 2.212                              |
| <i>FAR2</i>         | 0.438                              | <i>ABL2</i>        | 2.217                              |
| <i>TLR2</i>         | 0.439                              | <i>PPHLN1</i>      | 2.218                              |
| <i>LOC100049716</i> | 0.439                              | <i>ZNF529</i>      | 2.219                              |
| <i>TJP1</i>         | 0.439                              | <i>ALCAM</i>       | 2.225                              |
| <i>AMPD3</i>        | 0.439                              | <i>EPB41L4B</i>    | 2.231                              |
| <i>IL13RA1</i>      | 0.440                              | <i>TGFBR2</i>      | 2.238                              |

| <b>Gene Symbol</b> | <b>Fold Change<br/>p.Arg500Pro</b> | <b>Gene Symbol</b> | <b>Fold Change<br/>p.Arg500Pro</b> |
|--------------------|------------------------------------|--------------------|------------------------------------|
| GGT6               | 0.440                              | SVIL               | 2.239                              |
| ST3GAL6            | 0.441                              | CBLB               | 2.251                              |
| WDR53              | 0.442                              | CUGBP2             | 2.254                              |
| CREG1              | 0.442                              | MLPH               | 2.256                              |
| EPB41L3            | 0.443                              | CYP4B1             | 2.256                              |
| GDPD3              | 0.445                              | RUFY2              | 2.257                              |
| SGPP2              | 0.445                              | ABCC3              | 2.259                              |
| TM7SF2             | 0.445                              | ACSL3              | 2.264                              |
| PPP2R2C            | 0.445                              | KLHL29             | 2.267                              |
| C12orf29           | 0.446                              | GNPTAB             | 2.270                              |
| GNAI1              | 0.446                              | ASNS               | 2.282                              |
| SCNN1A             | 0.446                              | LIMCH1             | 2.283                              |
| CLN8               | 0.447                              | AKR1C3             | 2.292                              |
| EPS8L1             | 0.449                              | EIF3B              | 2.292                              |
| BNIP3L             | 0.450                              | FZD10              | 2.294                              |
| ABHD12B            | 0.450                              | DCAF6              | 2.316                              |
| ABHD5              | 0.451                              | TMTC1              | 2.316                              |
| PDZD2              | 0.451                              | ICA1               | 2.319                              |
| PRSS8              | 0.452                              | ATP5C1             | 2.320                              |
| PKP1               | 0.453                              | C6orf115           | 2.331                              |
| RBBP6              | 0.454                              | FTH1               | 2.342                              |
| HSPA4L             | 0.457                              | NGEF               | 2.343                              |
| CYB561D1           | 0.457                              | TRNP1              | 2.348                              |
| CHIC2              | 0.458                              | TRAK2              | 2.357                              |
| NEAT1              | 0.459                              | TFCP2L1            | 2.358                              |
| MGC87042           | 0.459                              | METTL7A            | 2.374                              |
| KIAA1239           | 0.459                              | GPR155             | 2.409                              |
| TCHH               | 0.460                              | IRX5               | 2.413                              |
| SULT2B1            | 0.461                              | INPP5D             | 2.422                              |
| WDR66              | 0.461                              | LLGL2              | 2.437                              |
| DSG1               | 0.462                              | CLDN7              | 2.442                              |
| BLOC1S3            | 0.462                              | HOTAIR             | 2.449                              |
| SNX21              | 0.465                              | CDH16              | 2.462                              |
| MAPRE2             | 0.465                              | MAML2              | 2.483                              |
| WNT5A              | 0.467                              | TFRC               | 2.495                              |
| RANBP9             | 0.468                              | LIMA1              | 2.505                              |
| FNIP2              | 0.468                              | IGFBP7             | 2.513                              |
| PSG1               | 0.470                              | BIK                | 2.516                              |
| ALDH5A1            | 0.470                              | KCNN4              | 2.523                              |
| HIST1H2BG          | 0.471                              | NPAS2              | 2.529                              |
| FAM107B            | 0.471                              | TIMP2              | 2.532                              |
| CPEB4              | 0.471                              | PPA1               | 2.540                              |
| VWF                | 0.473                              | PBX1               | 2.554                              |
| FGF11              | 0.474                              | NPDC1              | 2.555                              |
| PXMP4              | 0.474                              | TNS3               | 2.564                              |
| FNTB               | 0.474                              | LAMP3              | 2.565                              |
| RASAL1             | 0.475                              | LMO7               | 2.572                              |
| ERCC1              | 0.475                              | ESYT2              | 2.581                              |
| TMPRSS13           | 0.476                              | MEIS2              | 2.598                              |
| GRHL3              | 0.477                              | CMTM4              | 2.598                              |
| SPTLC2             | 0.478                              | CDKN1C             | 2.601                              |
| ELOVL1             | 0.478                              | NCOA7              | 2.612                              |

| <b>Gene Symbol</b>  | <b>Fold Change<br/>p.Arg500Pro</b> | <b>Gene Symbol</b> | <b>Fold Change<br/>p.Arg500Pro</b> |
|---------------------|------------------------------------|--------------------|------------------------------------|
| <i>DLX3</i>         | 0.478                              | <i>TBC1D8</i>      | 2.628                              |
| <i>BCO2</i>         | 0.479                              | <i>EMP1</i>        | 2.649                              |
| <i>SERPINB8</i>     | 0.479                              | <i>SOX9</i>        | 2.678                              |
| <i>DEFB1</i>        | 0.480                              | <i>KRT13</i>       | 2.707                              |
| <i>ALDOC</i>        | 0.480                              | <i>ACPL2</i>       | 2.718                              |
| <i>DENND2C</i>      | 0.480                              | <i>FLJ20674</i>    | 2.750                              |
| <i>SEPT8</i>        | 0.481                              | <i>DNER</i>        | 2.773                              |
| <i>CNTN1</i>        | 0.481                              | <i>ID3</i>         | 2.791                              |
| <i>EPN3</i>         | 0.482                              | <i>UPK1B</i>       | 2.836                              |
| <i>WBP5</i>         | 0.482                              | <i>TNIK</i>        | 2.845                              |
| <i>ATP11B</i>       | 0.482                              | <i>UCP2</i>        | 2.905                              |
| <i>JMY</i>          | 0.483                              | <i>LEMD1</i>       | 2.908                              |
| <i>SPIRE1</i>       | 0.483                              | <i>PTGES</i>       | 2.932                              |
| <i>RHOF</i>         | 0.484                              | <i>C9orf150</i>    | 2.946                              |
| <i>LOC100132815</i> | 0.484                              | <i>ITGB6</i>       | 2.952                              |
| <i>HBEGF</i>        | 0.484                              | <i>SLITRK6</i>     | 3.000                              |
| <i>NGFRAP1</i>      | 0.486                              | <i>GCNT2</i>       | 3.013                              |
| <i>C17orf39</i>     | 0.487                              | <i>KRT8</i>        | 3.020                              |
| <i>FLJ37078</i>     | 0.487                              | <i>NINJ1</i>       | 3.023                              |
| <i>ZRANB1</i>       | 0.488                              | <i>CEACAM1</i>     | 3.023                              |
| <i>FBXO45</i>       | 0.489                              | <i>PIK3R3</i>      | 3.027                              |
| <i>ELAVL2</i>       | 0.489                              | <i>KITLG</i>       | 3.036                              |
| <i>ZNF254</i>       | 0.490                              | <i>IGFBP3</i>      | 3.041                              |
| <i>TMEM185A</i>     | 0.490                              | <i>DDAH1</i>       | 3.079                              |
| <i>CIB2</i>         | 0.491                              | <i>CACHD1</i>      | 3.181                              |
| <i>TIFA</i>         | 0.491                              | <i>RPS24</i>       | 3.213                              |
| <i>SPINK7</i>       | 0.491                              | <i>ALDH1A1</i>     | 3.246                              |
| <i>AKIRIN1</i>      | 0.493                              | <i>GNE</i>         | 3.266                              |
| <i>KLF4</i>         | 0.494                              | <i>CCND1</i>       | 3.267                              |
| <i>PI3</i>          | 0.494                              | <i>LXN</i>         | 3.285                              |
| <i>MPPE1</i>        | 0.494                              | <i>FAM84B</i>      | 3.298                              |
| <i>KRT33A</i>       | 0.495                              | <i>FNBP1L</i>      | 3.304                              |
| <i>DENND2D</i>      | 0.495                              | <i>IL15</i>        | 3.320                              |
| <i>LTB4R</i>        | 0.495                              | <i>PLA2G7</i>      | 3.331                              |
| <i>SFT2D2</i>       | 0.497                              | <i>MYO5C</i>       | 3.377                              |
| <i>GNAL</i>         | 0.497                              | <i>GCNT3</i>       | 3.407                              |
| <i>ETNK2</i>        | 0.498                              | <i>MYLK</i>        | 3.432                              |
| <i>GPSM1</i>        | 0.499                              | <i>ASS1</i>        | 3.493                              |
| <i>SORD</i>         | 0.499                              | <i>MUC1</i>        | 3.561                              |
| <i>FLVCR2</i>       | 0.499                              | <i>DPP4</i>        | 3.572                              |
| <i>FLJ40330</i>     | 0.499                              | <i>IGFL1</i>       | 3.642                              |
| <i>MGLL</i>         | 0.500                              | <i>KANK4</i>       | 3.684                              |
| <i>SCEL</i>         | 0.500                              | <i>HSD11B2</i>     | 3.734                              |
| <i>JHDM1D</i>       | 0.500                              | <i>CDKN2B</i>      | 3.743                              |
| <i>KRT37</i>        | 0.502                              | <i>SLC6A14</i>     | 3.815                              |
| <i>KIAA0652</i>     | 0.503                              | <i>OVOL2</i>       | 3.968                              |
| <i>NOTCH2NL</i>     | 0.504                              | <i>CSGALNACT1</i>  | 3.994                              |
| <i>OAF</i>          | 0.505                              | <i>HRASLS2</i>     | 4.152                              |
| <i>SQLE</i>         | 0.505                              | <i>COX7A1</i>      | 4.260                              |
| <i>ZFAND2A</i>      | 0.507                              | <i>SERPINA3</i>    | 4.393                              |
| <i>KALRN</i>        | 0.507                              | <i>KRT24</i>       | 4.819                              |
| <i>ACAP2</i>        | 0.507                              | <i>TRIM2</i>       | 4.986                              |

| <b>Gene Symbol</b> | <b>Fold Change<br/>p.Arg500Pro</b> | <b>Gene Symbol</b>  | <b>Fold Change<br/>p.Arg500Pro</b> |
|--------------------|------------------------------------|---------------------|------------------------------------|
| <i>IL8RB</i>       | 0.508                              | <i>MSLN</i>         | 5.126                              |
| <i>DMKN</i>        | 0.510                              | <i>SPON2</i>        | 5.348                              |
| <i>MUM1L1</i>      | 0.510                              | <i>PLA2G16</i>      | 5.434                              |
| <i>hCG_1818231</i> | 0.511                              | <i>SLC39A8</i>      | 5.528                              |
| <i>CHST1</i>       | 0.511                              | <i>KLRG2</i>        | 5.655                              |
| <i>TAGLN3</i>      | 0.512                              | <i>BHLHE41</i>      | 5.807                              |
| <i>GPR68</i>       | 0.513                              | <i>CYP4F3</i>       | 5.908                              |
| <i>ALAS1</i>       | 0.513                              | <i>ITGB8</i>        | 5.992                              |
| <i>TUBB2A</i>      | 0.513                              | <i>KRT15</i>        | 6.125                              |
| <i>ANKRD35</i>     | 0.514                              | <i>EPCAM</i>        | 6.405                              |
| <i>ITSN2</i>       | 0.515                              | <i>MAL</i>          | 6.653                              |
| <i>ABLIM1</i>      | 0.515                              | <i>DAPK1</i>        | 6.973                              |
| <i>C6orf105</i>    | 0.516                              | <i>RARRES1</i>      | 7.885                              |
| <i>ARNTL2</i>      | 0.516                              | <i>S100A4</i>       | 8.705                              |
| <i>ADM</i>         | 0.516                              | <i>CYP1B1</i>       | 9.298                              |
| <i>CLIP4</i>       | 0.516                              | <i>LOC100131138</i> | 10.163                             |
| <i>STARD5</i>      | 0.516                              | <i>KRT7</i>         | 13.032                             |
| <i>BEX2</i>        | 0.516                              | <i>S100P</i>        | 14.420                             |
| <i>NDFIP2</i>      | 0.516                              | <i>GPRC5A</i>       | 19.809                             |
| <i>KREMEN1</i>     | 0.518                              | <i>KRT19</i>        | 22.278                             |
| <i>C12orf56</i>    | 0.519                              | <i>KRT4</i>         | 31.735                             |

**Table S4. Overlap of Altered Genes in p.Ile482Thr and p.Arg500Pro Organotypic Cultures**

| <b>Gene Symbol</b> | <b>Fold Δ</b><br><b>p.Ile482Thr</b> | <b>Fold Δ</b><br><b>p.Arg500Pro</b> | <b>Gene Symbol</b> | <b>Fold Δ</b><br><b>p.Ile482Thr</b> | <b>Fold Δ</b><br><b>p.Arg500Pro</b> |
|--------------------|-------------------------------------|-------------------------------------|--------------------|-------------------------------------|-------------------------------------|
| <i>AADAACL2</i>    | 0.093                               | 0.046                               | <i>ERLIN2</i>      | 1.971                               | 1.859                               |
| <i>ABCA12</i>      | 0.261                               | 0.307                               | <i>ESYT3</i>       | 0.343                               | 0.416                               |
| <i>ABCG1</i>       | 0.240                               | 0.316                               | <i>ETNK2</i>       | 0.432                               | 0.498                               |
| <i>ACPL2</i>       | 3.254                               | 2.718                               | <i>ETV6</i>        | 1.951                               | 1.945                               |
| <i>ADAP2</i>       | 0.112                               | 0.143                               | <i>FAM102B</i>     | 2.838                               | 1.911                               |
| <i>ADM</i>         | 0.313                               | 0.516                               | <i>FAM13A</i>      | 2.239                               | 2.093                               |
| <i>AKR1C3</i>      | 2.351                               | 2.292                               | <i>FAM13B</i>      | 2.012                               | 1.989                               |
| <i>ALDOC</i>       | 0.446                               | 0.480                               | <i>FAM179B</i>     | 2.117                               | 1.985                               |
| <i>ALOX12B</i>     | 0.081                               | 0.087                               | <i>FAM3C</i>       | 2.012                               | 1.889                               |
| <i>ALOXE3</i>      | 0.166                               | 0.137                               | <i>FAM43A</i>      | 0.327                               | 0.270                               |
| <i>AMPD3</i>       | 0.383                               | 0.439                               | <i>FAM65C</i>      | 0.505                               | 0.404                               |
| <i>ANGPTL4</i>     | 0.476                               | 0.429                               | <i>FAM84B</i>      | 2.965                               | 3.298                               |
| <i>ANKRD22</i>     | 0.296                               | 0.293                               | <i>FAS</i>         | 1.880                               | 1.869                               |
| <i>ANKRD35</i>     | 0.371                               | 0.514                               | <i>FBXO45</i>      | 0.556                               | 0.489                               |
| <i>AQP9</i>        | 0.166                               | 0.170                               | <i>FCHSD1</i>      | 0.215                               | 0.157                               |
| <i>ASPRV1</i>      | 0.053                               | 0.025                               | <i>FGD2</i>        | 0.339                               | 0.387                               |
| <i>ATP10B</i>      | 0.114                               | 0.127                               | <i>FGD3</i>        | 0.395                               | 0.387                               |
| <i>ATP2C2</i>      | 0.291                               | 0.360                               | <i>FGF11</i>       | 0.364                               | 0.474                               |
| <i>ATP6V1C2</i>    | 0.098                               | 0.088                               | <i>FHDC1</i>       | 0.404                               | 0.431                               |
| <i>AVPI1</i>       | 0.334                               | 0.307                               | <i>FILIP1L</i>     | 0.275                               | 0.253                               |
| <i>BBOX1</i>       | 0.244                               | 0.270                               | <i>FLJ20674</i>    | 2.038                               | 2.750                               |
| <i>BCO2</i>        | 0.318                               | 0.479                               | <i>FLVCR2</i>      | 0.514                               | 0.499                               |
| <i>BID</i>         | 2.490                               | 1.905                               | <i>FMO2</i>        | 0.502                               | 0.415                               |
| <i>BPIL2</i>       | 0.095                               | 0.106                               | <i>FNBP1L</i>      | 3.746                               | 3.304                               |
| <i>C10orf99</i>    | 0.052                               | 0.099                               | <i>FTH1</i>        | 2.576                               | 2.342                               |
| <i>C13orf23</i>    | 2.076                               | 1.916                               | <i>GAS7</i>        | 0.195                               | 0.300                               |
| <i>C15orf59</i>    | 0.327                               | 0.431                               | <i>GBAP</i>        | 0.348                               | 0.362                               |
| <i>C9orf169</i>    | 0.435                               | 0.434                               | <i>GCNT2</i>       | 2.776                               | 3.013                               |
| <i>CA12</i>        | 0.434                               | 0.530                               | <i>GCNT3</i>       | 3.205                               | 3.407                               |
| <i>CACHD1</i>      | 3.080                               | 3.181                               | <i>GGCT</i>        | 0.518                               | 0.428                               |
| <i>CARD14</i>      | 0.371                               | 0.407                               | <i>GGT6</i>        | 0.287                               | 0.440                               |
| <i>CARD18</i>      | 0.264                               | 0.288                               | <i>GLRX</i>        | 0.148                               | 0.092                               |
| <i>CCND1</i>       | 3.597                               | 3.267                               | <i>GNAL</i>        | 0.447                               | 0.497                               |
| <i>CDH16</i>       | 2.269                               | 2.462                               | <i>GNE</i>         | 2.486                               | 3.266                               |
| <i>CHCHD7</i>      | 2.112                               | 1.845                               | <i>GNPTAB</i>      | 2.429                               | 2.270                               |
| <i>CHML</i>        | 2.468                               | 2.191                               | <i>GOLM1</i>       | 1.938                               | 2.031                               |
| <i>CHP2</i>        | 0.428                               | 0.419                               | <i>GPLD1</i>       | 0.362                               | 0.417                               |
| <i>CITED2</i>      | 0.340                               | 0.319                               | <i>GPR98</i>       | 0.549                               | 0.555                               |
| <i>CLCN5</i>       | 0.541                               | 0.548                               | <i>GPRC5A</i>      | 19.889                              | 19.809                              |
| <i>CLDN1</i>       | 0.518                               | 0.548                               | <i>GPSM1</i>       | 0.468                               | 0.499                               |
| <i>CNFN</i>        | 0.163                               | 0.125                               | <i>GPT2</i>        | 0.369                               | 0.358                               |
| <i>CPM</i>         | 0.161                               | 0.129                               | <i>GRAMD1C</i>     | 0.395                               | 0.383                               |
| <i>CRCT1</i>       | 0.044                               | 0.044                               | <i>GSTT1</i>       | 2.453                               | 2.028                               |
| <i>CREG1</i>       | 0.354                               | 0.442                               | <i>HAUS6</i>       | 2.195                               | 1.907                               |
| <i>CRYAB</i>       | 0.151                               | 0.184                               | <i>HBEGF</i>       | 0.524                               | 0.484                               |
| <i>CTSD</i>        | 0.343                               | 0.358                               | <i>hCG_1817306</i> | 0.319                               | 0.316                               |
| <i>CYP1B1</i>      | 16.547                              | 9.298                               | <i>HES4</i>        | 2.552                               | 1.888                               |
| <i>CYP4F22</i>     | 0.114                               | 0.096                               | <i>HOMER2</i>      | 0.440                               | 0.391                               |
| <i>CYP4F3</i>      | 3.119                               | 5.908                               | <i>HPGD</i>        | 0.136                               | 0.070                               |
| <i>DDAH1</i>       | 3.803                               | 3.079                               | <i>HPSE</i>        | 0.125                               | 0.107                               |



| <b>Gene Symbol</b> | <b>Fold Δ<br/>p.Ile482Thr</b> | <b>Fold Δ<br/>p.Arg500Pro</b> | <b>Gene Symbol</b> | <b>Fold Δ<br/>p.Ile482Thr</b> | <b>Fold Δ<br/>p.Arg500Pro</b> |
|--------------------|-------------------------------|-------------------------------|--------------------|-------------------------------|-------------------------------|
| <i>DEGS2</i>       | 0.276                         | 0.252                         | <i>HRASLS2</i>     | 4.592                         | 4.152                         |
| <i>DENND2C</i>     | 0.464                         | 0.480                         | <i>HSD11B1</i>     | 0.215                         | 0.257                         |
| <i>DGAT2</i>       | 0.207                         | 0.210                         | <i>HSD11B2</i>     | 2.321                         | 3.734                         |
| <i>DHRS9</i>       | 0.091                         | 0.059                         | <i>HSPA4L</i>      | 0.456                         | 0.457                         |
| <i>DIRC3</i>       | 0.541                         | 0.521                         | <i>HYAL4</i>       | 0.204                         | 0.270                         |
| <i>DLX5</i>        | 0.324                         | 0.272                         | <i>ID3</i>         | 3.558                         | 2.791                         |
| <i>DMKN</i>        | 0.498                         | 0.510                         | <i>IDE</i>         | 0.329                         | 0.278                         |
| <i>DSC1</i>        | 0.054                         | 0.057                         | <i>IFFO2</i>       | 0.296                         | 0.364                         |
| <i>DSG1</i>        | 0.399                         | 0.462                         | <i>IGFBP7</i>      | 1.876                         | 2.513                         |
| <i>DUOXA1</i>      | 0.259                         | 0.382                         | <i>IL15</i>        | 8.471                         | 3.320                         |
| <i>DUSP1</i>       | 0.209                         | 0.198                         | <i>IL1B</i>        | 0.478                         | 0.342                         |
| <i>EEF2K</i>       | 1.985                         | 1.966                         | <i>IL1F7</i>       | 0.334                         | 0.367                         |
| <i>EGLN3</i>       | 0.335                         | 0.332                         | <i>IL1F8</i>       | 0.337                         | 0.402                         |
| <i>EGR3</i>        | 0.237                         | 0.250                         | <i>IL27RA</i>      | 2.028                         | 1.799                         |
| <i>ELF3</i>        | 2.005                         | 2.211                         | <i>IL8RB</i>       | 0.520                         | 0.508                         |
| <i>ELOVL4</i>      | 0.277                         | 0.291                         | <i>INPP4A</i>      | 1.970                         | 1.987                         |
| <i>ELOVL7</i>      | 0.323                         | 0.334                         | <i>INPP5D</i>      | 1.960                         | 2.422                         |
| <i>EML1</i>        | 0.455                         | 0.416                         | <i>IPO5</i>        | 2.312                         | 1.954                         |
| <i>EPCAM</i>       | 8.758                         | 6.405                         | <i>IQCE</i>        | 2.128                         | 2.113                         |
| <i>EPHX3</i>       | 0.406                         | 0.434                         | <i>IRX5</i>        | 1.998                         | 2.413                         |
| <i>EPS8L1</i>      | 0.322                         | 0.449                         | <i>ITGB6</i>       | 2.336                         | 2.952                         |
| <i>EXPH5</i>       | 0.287                         | 0.376                         | <i>ITGB8</i>       | 4.636                         | 5.992                         |
| <i>FABP7</i>       | 0.155                         | 0.171                         | <i>ITSN2</i>       | 0.460                         | 0.515                         |
| <i>FAM89A</i>      | 0.360                         | 0.325                         | <i>IVL</i>         | 0.485                         | 0.540                         |
| <i>FLG</i>         | 0.135                         | 0.143                         | <i>KALRN</i>       | 0.508                         | 0.507                         |
| <i>FLG2</i>        | 0.048                         | 0.026                         | <i>KANK4</i>       | 8.719                         | 3.684                         |
| <i>FLJ40330</i>    | 0.446                         | 0.499                         | <i>KCNN4</i>       | 2.747                         | 2.523                         |
| <i>FNIP2</i>       | 0.485                         | 0.468                         | <i>KCTD11</i>      | 0.415                         | 0.375                         |
| <i>FNTB</i>        | 0.471                         | 0.474                         | <i>KCTD4</i>       | 0.254                         | 0.175                         |
| <i>FRY</i>         | 0.220                         | 0.305                         | <i>KIAA0513</i>    | 0.343                         | 0.396                         |
| <i>FZD10</i>       | 2.241                         | 2.294                         | <i>KIAA1143</i>    | 2.431                         | 2.013                         |
| <i>GBP6</i>        | 0.214                         | 0.232                         | <i>KIAA1370</i>    | 0.469                         | 0.523                         |
| <i>GDA</i>         | 0.387                         | 0.549                         | <i>KIAA1632</i>    | 0.469                         | 0.524                         |
| <i>GDPD3</i>       | 0.315                         | 0.445                         | <i>KIFC3</i>       | 0.469                         | 0.529                         |
| <i>GJB6</i>        | 0.372                         | 0.344                         | <i>KITLG</i>       | 2.752                         | 3.036                         |
| <i>GLTP</i>        | 0.284                         | 0.304                         | <i>KLHL18</i>      | 0.463                         | 0.378                         |
| <i>GNAI1</i>       | 0.525                         | 0.446                         | <i>KLHL29</i>      | 1.867                         | 2.267                         |
| <i>GORAB</i>       | 2.011                         | 1.824                         | <i>KLK12</i>       | 0.338                         | 0.391                         |
| <i>GPX3</i>        | 0.161                         | 0.184                         | <i>KLK6</i>        | 0.116                         | 0.140                         |
| <i>GRHL1</i>       | 0.297                         | 0.359                         | <i>KLRG2</i>       | 5.109                         | 5.655                         |
| <i>GRHL3</i>       | 0.404                         | 0.477                         | <i>KREMEN1</i>     | 0.500                         | 0.518                         |
| <i>GRSF1</i>       | 2.144                         | 1.797                         | <i>KRT15</i>       | 4.090                         | 6.125                         |
| <i>H19</i>         | 0.345                         | 0.533                         | <i>KRT18</i>       | 1.950                         | 1.869                         |
| <i>HAL</i>         | 0.064                         | 0.018                         | <i>KRT2</i>        | 0.137                         | 0.123                         |
| <i>HIST1H2BG</i>   | 0.549                         | 0.471                         | <i>KRT31</i>       | 0.222                         | 0.338                         |
| <i>HK2</i>         | 0.335                         | 0.373                         | <i>KRT33A</i>      | 0.316                         | 0.495                         |
| <i>HMOX1</i>       | 0.055                         | 0.073                         | <i>KRT34</i>       | 0.236                         | 0.225                         |
| <i>HOPX</i>        | 0.343                         | 0.301                         | <i>KRT37</i>       | 0.464                         | 0.502                         |
| <i>HOTAIR</i>      | 2.381                         | 2.449                         | <i>KRT8</i>        | 4.010                         | 3.020                         |
| <i>HS3ST6</i>      | 0.226                         | 0.291                         | <i>KRT80</i>       | 0.363                         | 0.418                         |
| <i>HSPB8</i>       | 0.124                         | 0.164                         | <i>KRT9</i>        | 0.054                         | 0.081                         |
| <i>HSPC159</i>     | 0.301                         | 0.367                         | <i>LAMP3</i>       | 3.014                         | 2.565                         |

| <b>Gene Symbol</b> | <b>Fold Δ</b><br><b>p.Ile482Thr</b> | <b>Fold Δ</b><br><b>p.Arg500Pro</b> | <b>Gene Symbol</b>  | <b>Fold Δ</b><br><b>p.Ile482Thr</b> | <b>Fold Δ</b><br><b>p.Arg500Pro</b> |
|--------------------|-------------------------------------|-------------------------------------|---------------------|-------------------------------------|-------------------------------------|
| <i>IGFBP3</i>      | 4.876                               | 3.041                               | <i>LASS4</i>        | 0.319                               | 0.324                               |
| <i>IGFL1</i>       | 4.297                               | 3.642                               | <i>LCE1B</i>        | 0.014                               | 0.020                               |
| <i>IL1F10</i>      | 0.198                               | 0.197                               | <i>LCE1E</i>        | 0.099                               | 0.088                               |
| <i>IL1F5</i>       | 0.181                               | 0.138                               | <i>LCE2B</i>        | 0.009                               | 0.011                               |
| <i>IL1F9</i>       | 0.145                               | 0.083                               | <i>LEMD1</i>        | 2.850                               | 2.908                               |
| <i>IL1R2</i>       | 0.278                               | 0.138                               | <i>LGALS8</i>       | 0.454                               | 0.429                               |
| <i>IL22RA1</i>     | 0.383                               | 0.394                               | <i>LGR4</i>         | 2.138                               | 2.056                               |
| <i>JHDM1D</i>      | 0.533                               | 0.500                               | <i>LIMA1</i>        | 2.496                               | 2.505                               |
| <i>KDM3A</i>       | 0.461                               | 0.537                               | <i>LLGL2</i>        | 1.880                               | 2.437                               |
| <i>KIAA1239</i>    | 0.348                               | 0.459                               | <i>LMO7</i>         | 2.483                               | 2.572                               |
| <i>KLF4</i>        | 0.545                               | 0.494                               | <i>LOC100049716</i> | 0.510                               | 0.439                               |
| <i>KLF9</i>        | 2.041                               | 1.825                               | <i>LOC100130476</i> | 0.263                               | 0.289                               |
| <i>KLK13</i>       | 0.152                               | 0.156                               | <i>LOC100131138</i> | 7.676                               | 10.163                              |
| <i>KRT1</i>        | 0.237                               | 0.239                               | <i>LOC153346</i>    | 1.877                               | 1.936                               |
| <i>KRT19</i>       | 17.432                              | 22.278                              | <i>LOC283070</i>    | 0.335                               | 0.428                               |
| <i>KRT23</i>       | 0.113                               | 0.137                               | <i>LOC93622</i>     | 1.879                               | 1.801                               |
| <i>KRT24</i>       | 4.093                               | 4.819                               | <i>LOH12CR1</i>     | 0.547                               | 0.527                               |
| <i>KRT4</i>        | 16.984                              | 31.735                              | <i>LOR</i>          | 0.030                               | 0.009                               |
| <i>KRT7</i>        | 9.860                               | 13.032                              | <i>LPCAT2</i>       | 2.417                               | 2.077                               |
| <i>KRT77</i>       | 0.131                               | 0.270                               | <i>LRMP</i>         | 0.171                               | 0.139                               |
| <i>KRT78</i>       | 0.226                               | 0.243                               | <i>LRRC16A</i>      | 2.431                               | 1.963                               |
| <i>LASS3</i>       | 0.189                               | 0.229                               | <i>LRRC20</i>       | 0.383                               | 0.412                               |
| <i>LCE3D</i>       | 0.027                               | 0.019                               | <i>LTB4R</i>        | 0.382                               | 0.495                               |
| <i>LOC147645</i>   | 0.158                               | 0.230                               | <i>LTBP3</i>        | 2.209                               | 1.959                               |
| <i>LOC283404</i>   | 0.305                               | 0.246                               | <i>LXN</i>          | 2.855                               | 3.285                               |
| <i>LOC284023</i>   | 0.515                               | 0.433                               | <i>MACC1</i>        | 2.085                               | 1.983                               |
| <i>LOC645638</i>   | 0.390                               | 0.335                               | <i>MAGI3</i>        | 1.923                               | 1.913                               |
| <i>LOC729994</i>   | 0.366                               | 0.422                               | <i>MAL</i>          | 5.160                               | 6.653                               |
| <i>LY6G6C</i>      | 0.168                               | 0.167                               | <i>MAML2</i>        | 2.149                               | 2.483                               |
| <i>LYNX1</i>       | 0.329                               | 0.414                               | <i>MAP1LC3A</i>     | 0.445                               | 0.430                               |
| <i>LYPD5</i>       | 0.071                               | 0.075                               | <i>MAP2</i>         | 0.354                               | 0.424                               |
| <i>MARCH3</i>      | 0.127                               | 0.140                               | <i>MAPK14</i>       | 0.498                               | 0.367                               |
| <i>MPZL3</i>       | 0.345                               | 0.348                               | <i>MBD1</i>         | 0.397                               | 0.407                               |
| <i>MXD1</i>        | 0.416                               | 0.364                               | <i>MCAM</i>         | 0.312                               | 0.364                               |
| <i>MXRA5</i>       | 1.914                               | 2.206                               | <i>MEIS2</i>        | 2.402                               | 2.598                               |
| <i>NDUFA4L2</i>    | 0.301                               | 0.310                               | <i>METTL7A</i>      | 2.032                               | 2.374                               |
| <i>NEK4</i>        | 1.871                               | 1.996                               | <i>MFAP3L</i>       | 0.117                               | 0.138                               |
| <i>NFATC2</i>      | 0.186                               | 0.309                               | <i>MGC87042</i>     | 0.471                               | 0.459                               |
| <i>NIACR2</i>      | 0.474                               | 0.430                               | <i>MGLL</i>         | 0.507                               | 0.500                               |
| <i>NIPAL4</i>      | 0.354                               | 0.374                               | <i>MID2</i>         | 0.382                               | 0.309                               |
| <i>NMU</i>         | 0.165                               | 0.202                               | <i>MLLT11</i>       | 0.328                               | 0.272                               |
| <i>OVOL1</i>       | 0.278                               | 0.237                               | <i>MLPH</i>         | 2.452                               | 2.256                               |
| <i>PAQR5</i>       | 0.326                               | 0.368                               | <i>MMP1</i>         | 0.483                               | 0.437                               |
| <i>PBX1</i>        | 2.538                               | 2.554                               | <i>MMP10</i>        | 0.519                               | 0.294                               |
| <i>PCDH21</i>      | 0.483                               | 0.556                               | <i>MPPE1</i>        | 0.478                               | 0.494                               |
| <i>PCSK6</i>       | 0.271                               | 0.282                               | <i>MSLN</i>         | 4.475                               | 5.126                               |
| <i>PDZD2</i>       | 0.488                               | 0.451                               | <i>MUC1</i>         | 2.816                               | 3.561                               |
| <i>PDZK1IP1</i>    | 0.251                               | 0.257                               | <i>MUC15</i>        | 0.390                               | 0.359                               |
| <i>PGF</i>         | 0.361                               | 0.352                               | <i>MUM1L1</i>       | 0.477                               | 0.510                               |
| <i>PI3</i>         | 0.554                               | 0.494                               | <i>MVP</i>          | 2.208                               | 2.099                               |
| <i>PIK3R3</i>      | 3.717                               | 3.027                               | <i>MYLK</i>         | 3.819                               | 3.432                               |
| <i>PIM1</i>        | 0.376                               | 0.352                               | <i>MYO5C</i>        | 2.552                               | 3.377                               |

| <b>Gene Symbol</b> | <b>Fold Δ<br/>p.Ile482Thr</b> | <b>Fold Δ<br/>p.Arg500Pro</b> | <b>Gene Symbol</b> | <b>Fold Δ<br/>p.Ile482Thr</b> | <b>Fold Δ<br/>p.Arg500Pro</b> |
|--------------------|-------------------------------|-------------------------------|--------------------|-------------------------------|-------------------------------|
| <i>PLA2G3</i>      | 0.261                         | 0.291                         | <i>NAPEPLD</i>     | 2.199                         | 1.912                         |
| <i>PLCXD1</i>      | 0.318                         | 0.405                         | <i>NAV3</i>        | 0.502                         | 0.386                         |
| <i>PNPLA1</i>      | 0.326                         | 0.286                         | <i>NCOA7</i>       | 2.806                         | 2.612                         |
| <i>POF1B</i>       | 0.270                         | 0.316                         | <i>NDRG4</i>       | 0.204                         | 0.235                         |
| <i>PPARD</i>       | 0.389                         | 0.435                         | <i>NEAT1</i>       | 0.236                         | 0.459                         |
| <i>PRDM1</i>       | 0.499                         | 0.353                         | <i>NEB</i>         | 0.262                         | 0.312                         |
| <i>PRSS27</i>      | 0.319                         | 0.330                         | <i>NELL2</i>       | 0.385                         | 0.208                         |
| <i>PSG7</i>        | 0.406                         | 0.382                         | <i>NFE2L3</i>      | 0.538                         | 0.436                         |
| <i>PTGS2</i>       | 0.290                         | 0.293                         | <i>NGEF</i>        | 2.841                         | 2.343                         |
| <i>RAB11FIP1</i>   | 0.441                         | 0.536                         | <i>NGFRAP1</i>     | 0.511                         | 0.486                         |
| <i>RAET1E</i>      | 0.243                         | 0.249                         | <i>NINJ1</i>       | 3.475                         | 3.023                         |
| <i>RASGRP1</i>     | 0.323                         | 0.371                         | <i>NIPAL3</i>      | 2.012                         | 1.974                         |
| <i>RCAN1</i>       | 0.267                         | 0.277                         | <i>NLRP10</i>      | 0.220                         | 0.280                         |
| <i>RDH12</i>       | 0.135                         | 0.133                         | <i>NLRX1</i>       | 0.429                         | 0.522                         |
| <i>RGS2</i>        | 0.327                         | 0.303                         | <i>NOTCH2NL</i>    | 0.554                         | 0.504                         |
| <i>RNASE7</i>      | 0.029                         | 0.029                         | <i>NPAS2</i>       | 2.063                         | 2.529                         |
| <i>RNF39</i>       | 0.157                         | 0.145                         | <i>NPDC1</i>       | 2.202                         | 2.555                         |
| <i>RORA</i>        | 0.083                         | 0.086                         | <i>NPR2</i>        | 0.282                         | 0.406                         |
| <i>S100A12</i>     | 0.116                         | 0.055                         | <i>NSL1</i>        | 2.480                         | 1.832                         |
| <i>S100P</i>       | 14.267                        | 14.420                        | <i>NT5DC1</i>      | 2.147                         | 1.811                         |
| <i>SBSN</i>        | 0.176                         | 0.243                         | <i>NTS</i>         | 7.016                         | 1.887                         |
| <i>SCNN1B</i>      | 0.245                         | 0.366                         | <i>OAF</i>         | 0.494                         | 0.505                         |
| <i>SGPP2</i>       | 0.550                         | 0.445                         | <i>OASL</i>        | 0.137                         | 0.077                         |
| <i>SLC15A1</i>     | 0.229                         | 0.241                         | <i>OTUB2</i>       | 0.208                         | 0.189                         |
| <i>SLC5A1</i>      | 0.158                         | 0.138                         | <i>OVOL2</i>       | 4.346                         | 3.968                         |
| <i>SLC6A14</i>     | 2.040                         | 3.815                         | <i>PAC SIN3</i>    | 1.937                         | 1.835                         |
| <i>SLCO4A1</i>     | 0.273                         | 0.299                         | <i>PALM2-AKAP2</i> | 1.802                         | 1.975                         |
| <i>SOX7</i>        | 0.308                         | 0.250                         | <i>PAQR7</i>       | 0.398                         | 0.429                         |
| <i>SPON2</i>       | 4.203                         | 5.348                         | <i>PARP4</i>       | 2.149                         | 2.006                         |
| <i>SPRR2G</i>      | 0.014                         | 0.017                         | <i>PCYOX1L</i>     | 0.433                         | 0.554                         |
| <i>SPRR3</i>       | 0.137                         | 0.108                         | <i>PDHA1</i>       | 2.059                         | 1.805                         |
| <i>SPRR4</i>       | 0.128                         | 0.112                         | <i>PHACTR3</i>     | 3.847                         | 2.144                         |
| <i>SULT2B1</i>     | 0.404                         | 0.461                         | <i>PHKB</i>        | 2.268                         | 1.899                         |
| <i>TFRC</i>        | 2.649                         | 2.495                         | <i>PICALM</i>      | 2.351                         | 1.922                         |
| <i>TGM1</i>        | 0.179                         | 0.237                         | <i>PITPNM3</i>     | 2.202                         | 1.818                         |
| <i>TGM3</i>        | 0.140                         | 0.128                         | <i>PKP1</i>        | 0.521                         | 0.453                         |
| <i>TMEM45A</i>     | 0.537                         | 0.523                         | <i>PLA2G16</i>     | 5.046                         | 5.434                         |
| <i>TMTC1</i>       | 3.065                         | 2.316                         | <i>PLA2G7</i>      | 3.699                         | 3.331                         |
| <i>TNNT2</i>       | 0.308                         | 0.374                         | <i>PLBD1</i>       | 0.150                         | 0.228                         |
| <i>TP53</i>        | 2.395                         | 1.803                         | <i>PLCD4</i>       | 0.382                         | 0.542                         |
| <i>TPRG1</i>       | 0.398                         | 0.359                         | <i>PLEKHA7</i>     | 1.823                         | 2.110                         |
| <i>TTC39A</i>      | 0.320                         | 0.378                         | <i>PLIN2</i>       | 0.364                         | 0.395                         |
| <i>TTC39B</i>      | 0.542                         | 0.522                         | <i>PLK3</i>        | 0.556                         | 0.527                         |
| <i>UGCG</i>        | 0.409                         | 0.423                         | <i>PLXDC2</i>      | 0.378                         | 0.349                         |
| <i>UPK1B</i>       | 2.995                         | 2.836                         | <i>POLR3E</i>      | 1.884                         | 2.035                         |
| <i>USP2</i>        | 0.186                         | 0.219                         | <i>PPA1</i>        | 2.223                         | 2.540                         |
| <i>WFDC12</i>      | 0.053                         | 0.048                         | <i>PPAP2C</i>      | 2.519                         | 2.204                         |
| <i>WFDC5</i>       | 0.052                         | 0.070                         | <i>PPIF</i>        | 0.457                         | 0.384                         |
| <i>ZFP36</i>       | 0.530                         | 0.547                         | <i>PPP2R2C</i>     | 0.404                         | 0.445                         |
| <i>ZNF107</i>      | 0.393                         | 0.365                         | <i>PPP3CA</i>      | 1.972                         | 1.801                         |
| <i>ZNF529</i>      | 2.502                         | 2.219                         | <i>PPP4R4</i>      | 0.373                         | 0.427                         |
| <i>ZNF750</i>      | 0.455                         | 0.539                         | <i>PRCP</i>        | 0.381                         | 0.402                         |

| <b>Gene Symbol</b> | <b>Fold Δ<br/>p.Ile482Thr</b> | <b>Fold Δ<br/>p.Arg500Pro</b> | <b>Gene Symbol</b> | <b>Fold Δ<br/>p.Ile482Thr</b> | <b>Fold Δ<br/>p.Arg500Pro</b> |
|--------------------|-------------------------------|-------------------------------|--------------------|-------------------------------|-------------------------------|
| <i>ABAT</i>        | 1.970                         | 2.203                         | <i>PRNP</i>        | 0.479                         | 0.410                         |
| <i>ABCG4</i>       | 0.439                         | 0.384                         | <i>PRRG1</i>       | 1.900                         | 1.917                         |
| <i>ABHD12B</i>     | 0.549                         | 0.450                         | <i>PRSS8</i>       | 0.436                         | 0.452                         |
| <i>ABHD5</i>       | 0.482                         | 0.451                         | <i>PSAPL1</i>      | 0.150                         | 0.182                         |
| <i>ABLIM1</i>      | 0.416                         | 0.515                         | <i>PSAT1</i>       | 2.063                         | 2.212                         |
| <i>ACER1</i>       | 0.195                         | 0.171                         | <i>PSG1</i>        | 0.519                         | 0.470                         |
| <i>ACP6</i>        | 2.111                         | 2.023                         | <i>PSORS1C2</i>    | 0.248                         | 0.228                         |
| <i>ACSBG1</i>      | 0.208                         | 0.265                         | <i>PTGER3</i>      | 0.283                         | 0.169                         |
| <i>ACSL3</i>       | 1.824                         | 2.264                         | <i>PTGES</i>       | 3.080                         | 2.932                         |
| <i>AHR</i>         | 2.541                         | 2.111                         | <i>PTPN21</i>      | 0.478                         | 0.377                         |
| <i>ALAS1</i>       | 0.521                         | 0.513                         | <i>PXMP4</i>       | 0.529                         | 0.474                         |
| <i>ALCAM</i>       | 2.051                         | 2.225                         | <i>PYDC1</i>       | 0.304                         | 0.349                         |
| <i>ALDH1A1</i>     | 7.100                         | 3.246                         | <i>PYGB</i>        | 2.132                         | 2.024                         |
| <i>ALDH5A1</i>     | 0.347                         | 0.470                         | <i>QPCT</i>        | 0.373                         | 0.268                         |
| <i>ALOX12</i>      | 0.266                         | 0.235                         | <i>RAB5A</i>       | 0.530                         | 0.544                         |
| <i>AMDHD1</i>      | 0.348                         | 0.353                         | <i>RANBP9</i>      | 0.463                         | 0.468                         |
| <i>ANLN</i>        | 1.874                         | 2.069                         | <i>RARRES1</i>     | 5.596                         | 7.885                         |
| <i>ANXA4</i>       | 2.062                         | 2.143                         | <i>RARRES3</i>     | 2.958                         | 2.196                         |
| <i>ANXA9</i>       | 0.108                         | 0.111                         | <i>RASAL1</i>      | 0.437                         | 0.475                         |
| <i>APOE</i>        | 0.487                         | 0.551                         | <i>RBBP6</i>       | 0.473                         | 0.454                         |
| <i>APPL2</i>       | 0.480                         | 0.364                         | <i>RBM3</i>        | 1.840                         | 2.069                         |
| <i>ARG1</i>        | 0.032                         | 0.005                         | <i>RBP7</i>        | 0.240                         | 0.214                         |
| <i>ARG2</i>        | 0.219                         | 0.142                         | <i>REEP5</i>       | 1.799                         | 1.800                         |
| <i>ARHGAP18</i>    | 1.813                         | 2.195                         | <i>RFTN1</i>       | 0.165                         | 0.140                         |
| <i>ARL5A</i>       | 0.225                         | 0.210                         | <i>RHOF</i>        | 0.555                         | 0.484                         |
| <i>ARL6IP5</i>     | 2.536                         | 2.155                         | <i>RPS15A</i>      | 1.823                         | 1.881                         |
| <i>ARRDC4</i>      | 0.257                         | 0.204                         | <i>RPTN</i>        | 0.029                         | 0.027                         |
| <i>ASNS</i>        | 2.119                         | 2.282                         | <i>RRM2B</i>       | 2.326                         | 1.825                         |
| <i>ASS1</i>        | 2.176                         | 3.493                         | <i>RUNDC3A</i>     | 0.447                         | 0.357                         |
| <i>ATG2A</i>       | 0.551                         | 0.536                         | <i>S100A4</i>      | 7.038                         | 8.705                         |
| <i>ATL2</i>        | 2.523                         | 1.927                         | <i>SAP30L</i>      | 0.509                         | 0.542                         |
| <i>ATP11B</i>      | 0.494                         | 0.482                         | <i>SCCPDH</i>      | 2.477                         | 1.835                         |
| <i>ATP11C</i>      | 2.073                         | 1.907                         | <i>SCEL</i>        | 0.543                         | 0.500                         |
| <i>AZGP1</i>       | 0.062                         | 0.081                         | <i>SCNN1A</i>      | 0.269                         | 0.446                         |
| <i>BAG1</i>        | 2.282                         | 2.144                         | <i>SDC4</i>        | 1.956                         | 1.996                         |
| <i>BCHE</i>        | 0.137                         | 0.186                         | <i>SDR16C5</i>     | 0.390                         | 0.291                         |
| <i>BDNF</i>        | 0.368                         | 0.410                         | <i>SDR9C7</i>      | 0.078                         | 0.080                         |
| <i>BICD2</i>       | 0.441                         | 0.531                         | <i>SEPP1</i>       | 3.637                         | 2.086                         |
| <i>BIK</i>         | 3.579                         | 2.516                         | <i>SEPT8</i>       | 0.485                         | 0.481                         |
| <i>BLMH</i>        | 0.065                         | 0.057                         | <i>SERPINA12</i>   | 0.123                         | 0.122                         |
| <i>BLOC1S3</i>     | 0.513                         | 0.462                         | <i>SERPINA3</i>    | 8.519                         | 4.393                         |
| <i>BLVRB</i>       | 0.396                         | 0.426                         | <i>SGK1</i>        | 1.967                         | 1.943                         |
| <i>BNIP3</i>       | 0.214                         | 0.235                         | <i>SH3BGRL2</i>    | 0.523                         | 0.525                         |
| <i>BNIP3L</i>      | 0.446                         | 0.450                         | <i>SHROOM3</i>     | 1.904                         | 1.844                         |
| <i>C10orf57</i>    | 0.493                         | 0.529                         | <i>SLAMF7</i>      | 0.487                         | 0.388                         |
| <i>C12orf29</i>    | 0.502                         | 0.446                         | <i>SLC10A3</i>     | 0.508                         | 0.545                         |
| <i>C12orf56</i>    | 0.514                         | 0.519                         | <i>SLC16A10</i>    | 0.209                         | 0.219                         |
| <i>C13orf31</i>    | 2.201                         | 1.903                         | <i>SLC19A3</i>     | 0.248                         | 0.310                         |
| <i>C15orf48</i>    | 0.182                         | 0.147                         | <i>SLC22A5</i>     | 1.840                         | 1.930                         |
| <i>C16orf5</i>     | 1.911                         | 1.844                         | <i>SLC25A16</i>    | 1.993                         | 1.872                         |
| <i>C19orf21</i>    | 1.880                         | 1.807                         | <i>SLC31A2</i>     | 0.372                         | 0.387                         |
| <i>C1GALT1C1</i>   | 2.104                         | 1.909                         | <i>SLC37A2</i>     | 0.398                         | 0.414                         |

| <b>Gene Symbol</b> | <b>Fold Δ</b><br><b>p.Ile482Thr</b> | <b>Fold Δ</b><br><b>p.Arg500Pro</b> | <b>Gene Symbol</b> | <b>Fold Δ</b><br><b>p.Ile482Thr</b> | <b>Fold Δ</b><br><b>p.Arg500Pro</b> |
|--------------------|-------------------------------------|-------------------------------------|--------------------|-------------------------------------|-------------------------------------|
| <i>C1orf46</i>     | 0.043                               | 0.045                               | <i>SLC39A8</i>     | 10.319                              | 5.528                               |
| <i>C1orf68</i>     | 0.255                               | 0.283                               | <i>SLC46A2</i>     | 0.126                               | 0.176                               |
| <i>C4orf3</i>      | 0.550                               | 0.528                               | <i>SLC5A10</i>     | 0.504                               | 0.407                               |
| <i>C5orf46</i>     | 0.333                               | 0.232                               | <i>SLCO2A1</i>     | 0.149                               | 0.149                               |
| <i>C6orf115</i>    | 3.137                               | 2.331                               | <i>SLURP1</i>      | 0.367                               | 0.306                               |
| <i>C9orf150</i>    | 3.614                               | 2.946                               | <i>SMPD3</i>       | 0.139                               | 0.166                               |
| <i>CABC1</i>       | 1.938                               | 1.800                               | <i>SNAP29</i>      | 0.461                               | 0.405                               |
| <i>CALB2</i>       | 0.293                               | 0.201                               | <i>SNX21</i>       | 0.483                               | 0.465                               |
| <i>CALML3</i>      | 0.044                               | 0.053                               | <i>SNX30</i>       | 2.227                               | 2.176                               |
| <i>CALML5</i>      | 0.261                               | 0.227                               | <i>SORT1</i>       | 0.418                               | 0.432                               |
| <i>CALN1</i>       | 0.386                               | 0.425                               | <i>SOX9</i>        | 3.227                               | 2.678                               |
| <i>CAMK1D</i>      | 0.366                               | 0.393                               | <i>SPIRE1</i>      | 0.536                               | 0.483                               |
| <i>CARD16</i>      | 2.718                               | 1.923                               | <i>SPNS2</i>       | 0.246                               | 0.255                               |
| <i>CASP14</i>      | 0.132                               | 0.143                               | <i>SPTLC3</i>      | 0.396                               | 0.340                               |
| <i>CBLB</i>        | 3.168                               | 2.251                               | <i>SQLE</i>        | 0.528                               | 0.505                               |
| <i>CCDC127</i>     | 1.821                               | 1.828                               | <i>SRPX</i>        | 3.462                               | 2.166                               |
| <i>CCDC90A</i>     | 0.444                               | 0.392                               | <i>ST3GAL6</i>     | 0.337                               | 0.441                               |
| <i>CDC25B</i>      | 2.256                               | 1.963                               | <i>STARD5</i>      | 0.551                               | 0.516                               |
| <i>CDKN2B</i>      | 3.895                               | 3.743                               | <i>STX12</i>       | 0.550                               | 0.545                               |
| <i>CDSN</i>        | 0.092                               | 0.096                               | <i>STXBP6</i>      | 0.288                               | 0.286                               |
| <i>CEACAM1</i>     | 2.391                               | 3.023                               | <i>SUOX</i>        | 2.142                               | 2.015                               |
| <i>CEBPA</i>       | 0.199                               | 0.265                               | <i>TAPT1</i>       | 1.883                               | 1.853                               |
| <i>CHRNA9</i>      | 0.305                               | 0.303                               | <i>TBC1D8</i>      | 1.973                               | 2.628                               |
| <i>CHST1</i>       | 0.521                               | 0.511                               | <i>TFCP2L1</i>     | 2.233                               | 2.358                               |
| <i>CIDEA</i>       | 0.090                               | 0.121                               | <i>TGFBR2</i>      | 2.814                               | 2.238                               |
| <i>CLDN7</i>       | 3.154                               | 2.442                               | <i>TGM5</i>        | 0.148                               | 0.125                               |
| <i>CLEC7A</i>      | 2.190                               | 2.208                               | <i>TIMP2</i>       | 2.114                               | 2.532                               |
| <i>CLN8</i>        | 0.516                               | 0.447                               | <i>TJP1</i>        | 0.461                               | 0.439                               |
| <i>CMTM4</i>       | 2.406                               | 2.598                               | <i>TLR2</i>        | 0.449                               | 0.439                               |
| <i>CNTN1</i>       | 0.474                               | 0.481                               | <i>TM7SF2</i>      | 0.335                               | 0.445                               |
| <i>COTL1</i>       | 2.243                               | 1.902                               | <i>TMEM106B</i>    | 1.979                               | 1.959                               |
| <i>COX7A1</i>      | 5.004                               | 4.260                               | <i>TMEM129</i>     | 2.029                               | 1.963                               |
| <i>CPEB4</i>       | 0.477                               | 0.471                               | <i>TMEM40</i>      | 0.300                               | 0.292                               |
| <i>CRNN</i>        | 0.153                               | 0.142                               | <i>TMEM86A</i>     | 0.311                               | 0.286                               |
| <i>CSGALNACT1</i>  | 7.118                               | 3.994                               | <i>TMPRSS11D</i>   | 0.443                               | 0.370                               |
| <i>CSNK2A2</i>     | 0.272                               | 0.258                               | <i>TMPRSS13</i>    | 0.387                               | 0.476                               |
| <i>CST6</i>        | 0.099                               | 0.114                               | <i>TNFSF9</i>      | 2.213                               | 2.090                               |
| <i>CTSH</i>        | 0.128                               | 0.151                               | <i>TNS3</i>        | 4.003                               | 2.564                               |
| <i>CUGBP2</i>      | 3.468                               | 2.254                               | <i>TP53INP1</i>    | 1.819                               | 1.933                               |
| <i>CYB561D1</i>    | 0.494                               | 0.457                               | <i>TP53INP2</i>    | 0.458                               | 0.406                               |
| <i>CYB5D1</i>      | 2.365                               | 1.991                               | <i>TPM1</i>        | 2.229                               | 2.155                               |
| <i>CYP4B1</i>      | 2.269                               | 2.256                               | <i>TRAK2</i>       | 1.885                               | 2.357                               |
| <i>DAPK1</i>       | 5.893                               | 6.973                               | <i>TRERF1</i>      | 2.464                               | 2.178                               |
| <i>DAPL1</i>       | 0.112                               | 0.096                               | <i>TREX2</i>       | 0.166                               | 0.140                               |
| <i>DEFB1</i>       | 0.469                               | 0.480                               | <i>TRIM2</i>       | 2.295                               | 4.986                               |
| <i>DEFB4</i>       | 0.330                               | 0.313                               | <i>TRNP1</i>       | 2.710                               | 2.348                               |
| <i>DENND2D</i>     | 0.539                               | 0.495                               | <i>TST</i>         | 0.405                               | 0.342                               |
| <i>DGKQ</i>        | 2.004                               | 2.197                               | <i>TTC8</i>        | 2.402                               | 1.907                               |
| <i>DIO2</i>        | 0.155                               | 0.163                               | <i>TUBB2A</i>      | 0.515                               | 0.513                               |
| <i>DLX3</i>        | 0.430                               | 0.478                               | <i>TXNIP</i>       | 0.323                               | 0.282                               |
| <i>DNAJB5</i>      | 0.394                               | 0.359                               | <i>UBR2</i>        | 1.802                               | 1.952                               |
| <i>DNASE1L2</i>    | 0.321                               | 0.344                               | <i>UBR4</i>        | 0.324                               | 0.371                               |

| <b>Gene Symbol</b> | <b>Fold Δ</b><br><b>p.Ile482Thr</b> | <b>Fold Δ</b><br><b>p.Arg500Pro</b> | <b>Gene Symbol</b> | <b>Fold Δ</b><br><b>p.Ile482Thr</b> | <b>Fold Δ</b><br><b>p.Arg500Pro</b> |
|--------------------|-------------------------------------|-------------------------------------|--------------------|-------------------------------------|-------------------------------------|
| <i>DNER</i>        | 2.982                               | 2.773                               | <i>UCP2</i>        | 3.723                               | 2.905                               |
| <i>DOCK9</i>       | 0.481                               | 0.415                               | <i>UPP1</i>        | 0.463                               | 0.349                               |
| <i>DPP4</i>        | 4.512                               | 3.572                               | <i>VASN</i>        | 0.354                               | 0.316                               |
| <i>DUOX1</i>       | 0.308                               | 0.539                               | <i>VNN3</i>        | 0.424                               | 0.534                               |
| <i>DUSP14</i>      | 0.424                               | 0.364                               | <i>WBP5</i>        | 0.531                               | 0.482                               |
| <i>EEF1A1</i>      | 2.231                               | 2.187                               | <i>WDR53</i>       | 0.522                               | 0.442                               |
| <i>ELL3</i>        | 2.123                               | 1.905                               | <i>XKRX</i>        | 0.420                               | 0.386                               |
| <i>ELMOD1</i>      | 0.033                               | 0.044                               | <i>YOD1</i>        | 0.218                               | 0.236                               |
| <i>ELOVL1</i>      | 0.478                               | 0.478                               | <i>ZBED2</i>       | 0.530                               | 0.403                               |
| <i>EMP1</i>        | 2.757                               | 2.649                               | <i>ZCCHC2</i>      | 1.909                               | 2.027                               |
| <i>ENTPD6</i>      | 1.994                               | 2.169                               | <i>ZNF362</i>      | 1.847                               | 1.801                               |
| <i>EPB41L3</i>     | 0.381                               | 0.443                               | <i>ZNF703</i>      | 1.914                               | 2.112                               |
| <i>EPB41L4A</i>    | 2.007                               | 1.950                               | <i>ZNF738</i>      | 2.727                               | 2.063                               |
| <i>EPHB6</i>       | 0.155                               | 0.285                               | <i>ZNF91</i>       | 0.460                               | 0.414                               |
| <i>EPN3</i>        | 0.418                               | 0.482                               | <i>ZRANB1</i>      | 0.482                               | 0.488                               |
| <i>ERCC1</i>       | 0.544                               | 0.475                               |                    |                                     |                                     |

**Table S5. Genes that Are Induced or Repressed 2.5× or More in TP63i versus CTRi Keratinocyte Differentiation**

| <b>Gene Symbol</b> | <b>Fold Δ TP63i</b> | <b>Gene Symbol</b> | <b>Fold Δ TP63i</b> |
|--------------------|---------------------|--------------------|---------------------|
| <i>C10orf99</i>    | 0.00                | <i>TGM3</i>        | 0.40                |
| <i>WFDC5</i>       | 0.01                | <i>TMEM45A</i>     | 0.40                |
| <i>CRCT1</i>       | 0.02                | <i>DDX21</i>       | 2.50                |
| <i>LCE3D</i>       | 0.02                | <i>PASK</i>        | 2.50                |
| <i>PI3</i>         | 0.03                | <i>SFXN4</i>       | 2.50                |
| <i>SERPINB4</i>    | 0.03                | <i>SR140</i>       | 2.50                |
| <i>ALOX12B</i>     | 0.04                | <i>KTELC1</i>      | 2.51                |
| <i>EGLN3</i>       | 0.04                | <i>NBN</i>         | 2.51                |
| <i>IL1F9</i>       | 0.04                | <i>BXDC5</i>       | 2.52                |
| <i>KRT1</i>        | 0.04                | <i>COX11</i>       | 2.52                |
| <i>WFDC12</i>      | 0.04                | <i>FAM111A</i>     | 2.52                |
| <i>AADA2L2</i>     | 0.05                | <i>MED22</i>       | 2.52                |
| <i>ANKRD37</i>     | 0.05                | <i>NOL9</i>        | 2.52                |
| <i>ATP12A</i>      | 0.05                | <i>PNN</i>         | 2.52                |
| <i>CARD18</i>      | 0.05                | <i>UTP11L</i>      | 2.52                |
| <i>DSC1</i>        | 0.05                | <i>ZNF670</i>      | 2.52                |
| <i>FABP7</i>       | 0.05                | <i>C14orf126</i>   | 2.53                |
| <i>GPNMB</i>       | 0.05                | <i>GPR180</i>      | 2.53                |
| <i>PTGS2</i>       | 0.05                | <i>QTRTD1</i>      | 2.53                |
| <i>RDH12</i>       | 0.05                | <i>AKAP1</i>       | 2.54                |
| <i>S100A9</i>      | 0.05                | <i>BRI3BP</i>      | 2.54                |
| <i>TNFAIP3</i>     | 0.05                | <i>C6orf153</i>    | 2.54                |
| <i>TPRG1</i>       | 0.05                | <i>CDC14B</i>      | 2.54                |
| <i>ATF3</i>        | 0.06                | <i>FAM122B</i>     | 2.54                |
| <i>BMP2</i>        | 0.06                | <i>NUP35</i>       | 2.54                |
| <i>DUSP1</i>       | 0.06                | <i>CNPY2</i>       | 2.55                |
| <i>MARCH3</i>      | 0.06                | <i>DDX18</i>       | 2.55                |
| <i>SBSN</i>        | 0.06                | <i>LOC554203</i>   | 2.55                |
| <i>SPRR3</i>       | 0.06                | <i>SEC23IP</i>     | 2.55                |
| <i>UPK1A</i>       | 0.06                | <i>ZNF239</i>      | 2.55                |
| <i>ABCG1</i>       | 0.07                | <i>DAB2</i>        | 2.56                |
| <i>BPIL2</i>       | 0.07                | <i>DCAF4</i>       | 2.56                |
| <i>CNFN</i>        | 0.07                | <i>FADD</i>        | 2.56                |
| <i>LEP</i>         | 0.07                | <i>LOC339290</i>   | 2.56                |
| <i>SLC2A3</i>      | 0.07                | <i>TRIM45</i>      | 2.56                |
| <i>SLC6A14</i>     | 0.07                | <i>EIF5B</i>       | 2.57                |
| <i>AKR1C2</i>      | 0.08                | <i>FAM173A</i>     | 2.57                |
| <i>C14orf34</i>    | 0.08                | <i>LETM1</i>       | 2.57                |
| <i>CALB1</i>       | 0.08                | <i>MGC24103</i>    | 2.57                |
| <i>FLG</i>         | 0.08                | <i>PRKAG2</i>      | 2.57                |
| <i>HOPX</i>        | 0.08                | <i>SLC35B4</i>     | 2.57                |
| <i>IL1F5</i>       | 0.08                | <i>TMEM33</i>      | 2.57                |
| <i>KRT77</i>       | 0.08                | <i>GEN1</i>        | 2.58                |
| <i>NIPAL4</i>      | 0.08                | <i>NASP</i>        | 2.58                |
| <i>NOD2</i>        | 0.08                | <i>SNAP23</i>      | 2.58                |
| <i>PPP2R2B</i>     | 0.08                | <i>USP45</i>       | 2.58                |
| <i>RHCG</i>        | 0.08                | <i>ZFAND6</i>      | 2.58                |
| <i>RORA</i>        | 0.08                | <i>ABCC5</i>       | 2.59                |

| <b>Gene Symbol</b> | <b>Fold <math>\Delta</math> TP63i</b> | <b>Gene Symbol</b> | <b>Fold <math>\Delta</math> TP63i</b> |
|--------------------|---------------------------------------|--------------------|---------------------------------------|
| SLCO4A1            | 0.08                                  | ARIH2              | 2.59                                  |
| TGM1               | 0.08                                  | C11orf24           | 2.59                                  |
| C7orf68            | 0.09                                  | GK5                | 2.59                                  |
| CCL20              | 0.09                                  | LIG4               | 2.59                                  |
| KCNE1              | 0.09                                  | SEPHS2             | 2.59                                  |
| PCDH21             | 0.09                                  | SLC25A32           | 2.59                                  |
| AKR1C1             | 0.10                                  | URB2               | 2.59                                  |
| ANG                | 0.10                                  | ANK3               | 2.60                                  |
| ATP6V1C2           | 0.10                                  | FAM98A             | 2.60                                  |
| DSG1               | 0.10                                  | MRPS25             | 2.60                                  |
| FAM83C             | 0.10                                  | RNF219             | 2.60                                  |
| KRT23              | 0.10                                  | ZNF367             | 2.60                                  |
| KRTAP19-1          | 0.10                                  | ACTL6A             | 2.61                                  |
| PPP1R15A           | 0.10                                  | AP3M2              | 2.61                                  |
| SCN4B              | 0.10                                  | DHX30              | 2.61                                  |
| SCNN1B             | 0.10                                  | EEF1E1             | 2.61                                  |
| SOX7               | 0.10                                  | HELLS              | 2.61                                  |
| CLEC2B             | 0.11                                  | RUVBL1             | 2.61                                  |
| ELOVL4             | 0.11                                  | XRCC5              | 2.61                                  |
| FLG2               | 0.11                                  | AP3M1              | 2.62                                  |
| LOC283404          | 0.11                                  | ISL1               | 2.62                                  |
| LOC729994          | 0.11                                  | MAPK8              | 2.62                                  |
| NIACR2             | 0.11                                  | NUDT5              | 2.62                                  |
| OTUD1              | 0.11                                  | SLC25A12           | 2.62                                  |
| RFX2               | 0.11                                  | TMX2               | 2.62                                  |
| RNF39              | 0.11                                  | TRMT61B            | 2.62                                  |
| S100A12            | 0.11                                  | EEF2K              | 2.63                                  |
| ANGPTL4            | 0.12                                  | PARP1              | 2.63                                  |
| AVPI1              | 0.12                                  | TFRC               | 2.63                                  |
| ELOVL7             | 0.12                                  | C2CD2              | 2.64                                  |
| KRT24              | 0.12                                  | CAD                | 2.64                                  |
| OLFML2A            | 0.12                                  | EXOSC6             | 2.64                                  |
| PGF                | 0.12                                  | HIRA               | 2.64                                  |
| RNASE7             | 0.12                                  | MTG1               | 2.64                                  |
| TMPRSS4            | 0.12                                  | NEK4               | 2.64                                  |
| ZNF750             | 0.12                                  | PDCD11             | 2.64                                  |
| ABL2               | 0.13                                  | TFAM               | 2.64                                  |
| ADSSL1             | 0.13                                  | TMEM185B           | 2.64                                  |
| BHLHE40            | 0.13                                  | GTF3A              | 2.65                                  |
| CAPNS2             | 0.13                                  | KRT7               | 2.65                                  |
| CD55               | 0.13                                  | RWDD2B             | 2.65                                  |
| DUSP10             | 0.13                                  | STS                | 2.65                                  |
| FA2H               | 0.13                                  | ALG1               | 2.66                                  |
| GPX3               | 0.13                                  | B3GALTL            | 2.66                                  |
| IL20               | 0.13                                  | DCAF16             | 2.66                                  |
| NCF2               | 0.13                                  | PIGM               | 2.66                                  |
| PAQR5              | 0.13                                  | RRP15              | 2.66                                  |
| PLEKHM1            | 0.13                                  | C13orf23           | 2.67                                  |
| SERPINB3           | 0.13                                  | PPHLN1             | 2.67                                  |
| SLC5A1             | 0.13                                  | RRS1               | 2.67                                  |
| ABI3BP             | 0.14                                  | COMMD5             | 2.68                                  |
| ATP10B             | 0.14                                  | DOLK               | 2.68                                  |
| CYP4F22            | 0.14                                  | POGK               | 2.68                                  |



| <b>Gene Symbol</b> | <b>Fold <math>\Delta</math> TP63i</b> | <b>Gene Symbol</b> | <b>Fold <math>\Delta</math> TP63i</b> |
|--------------------|---------------------------------------|--------------------|---------------------------------------|
| CYP4F3             | 0.14                                  | SYNCRIP            | 2.68                                  |
| EDN2               | 0.14                                  | HNRNPAB            | 2.69                                  |
| GBP6               | 0.14                                  | NF2                | 2.69                                  |
| GLTP               | 0.14                                  | POP5               | 2.69                                  |
| IGFBP6             | 0.14                                  | SFRS15             | 2.69                                  |
| IKIP               | 0.14                                  | SYNJ1              | 2.69                                  |
| NFIL3              | 0.14                                  | TTF2               | 2.69                                  |
| SCNN1G             | 0.14                                  | WARS               | 2.69                                  |
| SLC28A3            | 0.14                                  | ZNF587             | 2.69                                  |
| SPRR1A             | 0.14                                  | ALG14              | 2.70                                  |
| THBD               | 0.14                                  | CREBZF             | 2.70                                  |
| ADRB2              | 0.15                                  | NFYB               | 2.70                                  |
| CDH16              | 0.15                                  | IPW                | 2.71                                  |
| DHDH               | 0.15                                  | NOC3L              | 2.71                                  |
| FANCE              | 0.15                                  | C11orf52           | 2.72                                  |
| HK2                | 0.15                                  | CADM1              | 2.72                                  |
| HYAL1              | 0.15                                  | COX4NB             | 2.72                                  |
| KLF7               | 0.15                                  | CYorf15B           | 2.72                                  |
| LOX                | 0.15                                  | LLPH               | 2.72                                  |
| MAF                | 0.15                                  | SFRS6              | 2.72                                  |
| MBD5               | 0.15                                  | ZBTB8A             | 2.72                                  |
| NRG1               | 0.15                                  | ZDHHC6             | 2.72                                  |
| OVOL1              | 0.15                                  | PILRB              | 2.73                                  |
| PHLDB2             | 0.15                                  | COL9A2             | 2.74                                  |
| RAET1E             | 0.15                                  | KLHDC5             | 2.74                                  |
| RASGRP1            | 0.15                                  | PTP4A2             | 2.74                                  |
| S100A8             | 0.15                                  | BPGM               | 2.75                                  |
| SLC39A2            | 0.15                                  | CLNS1A             | 2.75                                  |
| SPRR2G             | 0.15                                  | FAM98B             | 2.75                                  |
| UGCG               | 0.15                                  | GOSR2              | 2.75                                  |
| C21orf7            | 0.16                                  | LANCL2             | 2.75                                  |
| C3orf67            | 0.16                                  | SFPQ               | 2.75                                  |
| CKB                | 0.16                                  | TMEM138            | 2.75                                  |
| CXCL2              | 0.16                                  | C2orf55            | 2.76                                  |
| DMKN               | 0.16                                  | FAM118B            | 2.76                                  |
| EGR3               | 0.16                                  | FAM176A            | 2.76                                  |
| H19                | 0.16                                  | LOC145783          | 2.76                                  |
| MAOA               | 0.16                                  | RFXAP              | 2.76                                  |
| OSMR               | 0.16                                  | TM2D2              | 2.76                                  |
| PLA2G3             | 0.16                                  | TMEM209            | 2.76                                  |
| RGS2               | 0.16                                  | B3GALT6            | 2.77                                  |
| RRAD               | 0.16                                  | C11orf48           | 2.77                                  |
| S100P              | 0.16                                  | FAM92A1            | 2.77                                  |
| SLPI               | 0.16                                  | GPX8               | 2.77                                  |
| ADM                | 0.17                                  | SFRS7              | 2.77                                  |
| ASPRV1             | 0.17                                  | UBLCP1             | 2.77                                  |
| CA2                | 0.17                                  | ZNF200             | 2.77                                  |
| CYP26B1            | 0.17                                  | SLC35B3            | 2.78                                  |
| FNIP2              | 0.17                                  | ZNF30              | 2.78                                  |
| FST                | 0.17                                  | C15orf52           | 2.79                                  |
| NFKBIA             | 0.17                                  | RFX5               | 2.79                                  |
| PPP1R3C            | 0.17                                  | ACOT9              | 2.80                                  |
| ZBTB16             | 0.17                                  | ALKBH8             | 2.80                                  |

| <b>Gene Symbol</b> | <b>Fold <math>\Delta</math> TP63i</b> | <b>Gene Symbol</b> | <b>Fold <math>\Delta</math> TP63i</b> |
|--------------------|---------------------------------------|--------------------|---------------------------------------|
| ZFP36              | 0.17                                  | ATP11A             | 2.80                                  |
| A2ML1              | 0.18                                  | NEK3               | 2.80                                  |
| CA12               | 0.18                                  | KIAA0317           | 2.81                                  |
| CEBPD              | 0.18                                  | STARD7             | 2.81                                  |
| ELL2               | 0.18                                  | TRIM61             | 2.81                                  |
| EPHX3              | 0.18                                  | UHRF1              | 2.81                                  |
| ID2                | 0.18                                  | ZNF689             | 2.81                                  |
| IGFL2              | 0.18                                  | C15orf39           | 2.82                                  |
| IL8                | 0.18                                  | HINT1              | 2.82                                  |
| IMPA2              | 0.18                                  | TRAF3              | 2.83                                  |
| KCNK7              | 0.18                                  | ABCE1              | 2.84                                  |
| KIAA1239           | 0.18                                  | DDX46              | 2.84                                  |
| KISS1R             | 0.18                                  | GATAD2A            | 2.84                                  |
| KRTDAP             | 0.18                                  | LPXN               | 2.84                                  |
| LOC387763          | 0.18                                  | FUBP1              | 2.85                                  |
| LYPD5              | 0.18                                  | MAGEE1             | 2.85                                  |
| NDUFA4L2           | 0.18                                  | OAS2               | 2.85                                  |
| PAG1               | 0.18                                  | OAS3               | 2.85                                  |
| PNPLA1             | 0.18                                  | PHF12              | 2.85                                  |
| RCAN1              | 0.18                                  | ZNF174             | 2.85                                  |
| TMEM184A           | 0.18                                  | FKBP14             | 2.86                                  |
| WNT4               | 0.18                                  | PSMC2              | 2.86                                  |
| BACH1              | 0.19                                  | UBASH3B            | 2.86                                  |
| DLX5               | 0.19                                  | WDR36              | 2.86                                  |
| DSC2               | 0.19                                  | C1orf124           | 2.87                                  |
| FEZ1               | 0.19                                  | HERC2              | 2.87                                  |
| FZD10              | 0.19                                  | PMS1               | 2.87                                  |
| hCG_1818231        | 0.19                                  | ALG8               | 2.88                                  |
| LOC645638          | 0.19                                  | API5               | 2.88                                  |
| SLC6A8             | 0.19                                  | CCDC76             | 2.88                                  |
| TJP2               | 0.19                                  | GCDH               | 2.88                                  |
| ALOXE3             | 0.20                                  | MYCBP              | 2.88                                  |
| ARHGAP24           | 0.20                                  | NAPG               | 2.88                                  |
| ATP2C2             | 0.20                                  | NETO2              | 2.88                                  |
| CEACAM6            | 0.20                                  | SPCS3              | 2.88                                  |
| CLCA4              | 0.20                                  | ZNF614             | 2.88                                  |
| COBLL1             | 0.20                                  | CHORDC1            | 2.89                                  |
| CPEB2              | 0.20                                  | CYFIP1             | 2.89                                  |
| CPM                | 0.20                                  | DCAF8              | 2.89                                  |
| ENO2               | 0.20                                  | CIAPIN1            | 2.90                                  |
| ETS1               | 0.20                                  | NARG1              | 2.90                                  |
| FOS                | 0.20                                  | SLC4A2             | 2.90                                  |
| GDPD3              | 0.20                                  | ZMPSTE24           | 2.91                                  |
| GRHL3              | 0.20                                  | C5orf44            | 2.92                                  |
| JHDM1D             | 0.20                                  | LOC344595          | 2.92                                  |
| MLLT10             | 0.20                                  | NDUFAF4            | 2.92                                  |
| NUPR1              | 0.20                                  | TXNDC9             | 2.93                                  |
| PSMG4              | 0.20                                  | BID                | 2.94                                  |
| PTGS1              | 0.20                                  | FAM76B             | 2.94                                  |
| SPINK5             | 0.20                                  | SNRPD1             | 2.94                                  |
| SPINK7             | 0.20                                  | TNRC6A             | 2.94                                  |
| TSC22D3            | 0.20                                  | MIA3               | 2.95                                  |
| AQP9               | 0.21                                  | OGFOD1             | 2.95                                  |

| <b>Gene Symbol</b> | <b>Fold <math>\Delta</math> TP63i</b> | <b>Gene Symbol</b>  | <b>Fold <math>\Delta</math> TP63i</b> |
|--------------------|---------------------------------------|---------------------|---------------------------------------|
| <i>ERO1L</i>       | 0.21                                  | <i>RAB15</i>        | 2.95                                  |
| <i>GJB6</i>        | 0.21                                  | <i>AHSA1</i>        | 2.96                                  |
| <i>HSPA6</i>       | 0.21                                  | <i>CXXC5</i>        | 2.96                                  |
| <i>LYNX1</i>       | 0.21                                  | <i>DHFR</i>         | 2.96                                  |
| <i>MXI1</i>        | 0.21                                  | <i>LCMT2</i>        | 2.97                                  |
| <i>NMU</i>         | 0.21                                  | <i>NIPA2</i>        | 2.97                                  |
| <i>PIM1</i>        | 0.21                                  | <i>KLHL23</i>       | 2.98                                  |
| <i>POF1B</i>       | 0.21                                  | <i>UBXN8</i>        | 2.98                                  |
| <i>RNF144B</i>     | 0.21                                  | <i>VMA21</i>        | 2.98                                  |
| <i>SERPINB2</i>    | 0.21                                  | <i>CHUK</i>         | 2.99                                  |
| <i>TMTC1</i>       | 0.21                                  | <i>HAT1</i>         | 2.99                                  |
| <i>VEGFA</i>       | 0.21                                  | <i>NSUN2</i>        | 2.99                                  |
| <i>AKR1C3</i>      | 0.22                                  | <i>ADO</i>          | 3.01                                  |
| <i>AMPD3</i>       | 0.22                                  | <i>BCCIP</i>        | 3.01                                  |
| <i>BDH1</i>        | 0.22                                  | <i>EPHA4</i>        | 3.01                                  |
| <i>BTG2</i>        | 0.22                                  | <i>HERC5</i>        | 3.01                                  |
| <i>C1orf51</i>     | 0.22                                  | <i>MAP6D1</i>       | 3.01                                  |
| <i>HMOX1</i>       | 0.22                                  | <i>C21orf57</i>     | 3.02                                  |
| <i>KLK10</i>       | 0.22                                  | <i>CDC123</i>       | 3.02                                  |
| <i>SLC15A1</i>     | 0.22                                  | <i>CREM</i>         | 3.02                                  |
| <i>TMCC3</i>       | 0.22                                  | <i>DNAJC10</i>      | 3.02                                  |
| <i>TMEM45B</i>     | 0.22                                  | <i>FAM171A1</i>     | 3.02                                  |
| <i>TNS1</i>        | 0.22                                  | <i>IRS1</i>         | 3.02                                  |
| <i>ALDH3B2</i>     | 0.23                                  | <i>MID1</i>         | 3.02                                  |
| <i>ANKRD35</i>     | 0.23                                  | <i>FUSIP1</i>       | 3.03                                  |
| <i>C17orf39</i>    | 0.23                                  | <i>PEX26</i>        | 3.03                                  |
| <i>CDKN1C</i>      | 0.23                                  | <i>TXLNA</i>        | 3.03                                  |
| <i>DBP</i>         | 0.23                                  | <i>SRPRB</i>        | 3.04                                  |
| <i>EEA1</i>        | 0.23                                  | <i>PBX1</i>         | 3.05                                  |
| <i>EHF</i>         | 0.23                                  | <i>PRKRIR</i>       | 3.05                                  |
| <i>EXPH5</i>       | 0.23                                  | <i>TMEM2</i>        | 3.05                                  |
| <i>FAM89A</i>      | 0.23                                  | <i>ZRANB2</i>       | 3.05                                  |
| <i>FOXP2</i>       | 0.23                                  | <i>AOX1</i>         | 3.06                                  |
| <i>LOC147645</i>   | 0.23                                  | <i>KBTBD6</i>       | 3.06                                  |
| <i>LOC643837</i>   | 0.23                                  | <i>ZNF828</i>       | 3.06                                  |
| <i>MEOX1</i>       | 0.23                                  | <i>ATIC</i>         | 3.07                                  |
| <i>ARL5B</i>       | 0.24                                  | <i>DTX3L</i>        | 3.07                                  |
| <i>ASB2</i>        | 0.24                                  | <i>INTS9</i>        | 3.07                                  |
| <i>DLC1</i>        | 0.24                                  | <i>SP110</i>        | 3.08                                  |
| <i>DNAJB1</i>      | 0.24                                  | <i>TPCN2</i>        | 3.08                                  |
| <i>EGR1</i>        | 0.24                                  | <i>C12orf43</i>     | 3.09                                  |
| <i>ETS2</i>        | 0.24                                  | <i>COG2</i>         | 3.09                                  |
| <i>FBXO32</i>      | 0.24                                  | <i>IRGQ</i>         | 3.09                                  |
| <i>FEM1B</i>       | 0.24                                  | <i>SMC1A</i>        | 3.09                                  |
| <i>FOXQ1</i>       | 0.24                                  | <i>LOC100131262</i> | 3.10                                  |
| <i>HOOK1</i>       | 0.24                                  | <i>C11orf75</i>     | 3.11                                  |
| <i>KLF3</i>        | 0.24                                  | <i>RTN4IP1</i>      | 3.11                                  |
| <i>NGFR</i>        | 0.24                                  | <i>SRM</i>          | 3.11                                  |
| <i>PFKFB3</i>      | 0.24                                  | <i>TP53</i>         | 3.11                                  |
| <i>PGAP1</i>       | 0.24                                  | <i>FAM20C</i>       | 3.13                                  |
| <i>PSG4</i>        | 0.24                                  | <i>STAMBPL1</i>     | 3.13                                  |
| <i>RNASE4</i>      | 0.24                                  | <i>C5orf13</i>      | 3.14                                  |
| <i>RPS6KA5</i>     | 0.24                                  | <i>RFK</i>          | 3.14                                  |

| <b>Gene Symbol</b> | <b>Fold <math>\Delta</math> TP63i</b> | <b>Gene Symbol</b> | <b>Fold <math>\Delta</math> TP63i</b> |
|--------------------|---------------------------------------|--------------------|---------------------------------------|
| SQSTM1             | 0.24                                  | TRMT6              | 3.14                                  |
| TTC39B             | 0.24                                  | FXN                | 3.15                                  |
| ALOX15B            | 0.25                                  | LSM10              | 3.15                                  |
| ASCL2              | 0.25                                  | PGM2L1             | 3.15                                  |
| DAAM1              | 0.25                                  | QDPR               | 3.15                                  |
| DENND2C            | 0.25                                  | PAIP1              | 3.16                                  |
| DLX4               | 0.25                                  | PIGK               | 3.16                                  |
| FLRT3              | 0.25                                  | RCBTB1             | 3.16                                  |
| IL20RB             | 0.25                                  | MUM1               | 3.17                                  |
| IRF6               | 0.25                                  | C12orf4            | 3.18                                  |
| RAB11FIP1          | 0.25                                  | CYCS               | 3.18                                  |
| RND3               | 0.25                                  | NOP2               | 3.18                                  |
| TNNT2              | 0.25                                  | TRIM25             | 3.18                                  |
| ATF1               | 0.26                                  | SCLY               | 3.19                                  |
| CA9                | 0.26                                  | SFRS1              | 3.19                                  |
| CHI3L1             | 0.26                                  | ZBTB24             | 3.19                                  |
| DIRC3              | 0.26                                  | ZNF326             | 3.19                                  |
| FUT11              | 0.26                                  | CCDC66             | 3.20                                  |
| GADD45A            | 0.26                                  | EED                | 3.20                                  |
| INTS6              | 0.26                                  | TRAPPC10           | 3.20                                  |
| KIAA0146           | 0.26                                  | GORAB              | 3.21                                  |
| KLF4               | 0.26                                  | ZDHHC2             | 3.21                                  |
| KLF6               | 0.26                                  | AIMP2              | 3.22                                  |
| KRT4               | 0.26                                  | GTF3C6             | 3.22                                  |
| LAPTM5             | 0.26                                  | CCDC82             | 3.23                                  |
| LCN2               | 0.26                                  | RIMKLB             | 3.23                                  |
| LY6D               | 0.26                                  | TRAF3IP1           | 3.23                                  |
| MYO3B              | 0.26                                  | PRIC285            | 3.24                                  |
| PMFBP1             | 0.26                                  | HERPUD2            | 3.25                                  |
| RAPGEF4            | 0.26                                  | KIAA1826           | 3.25                                  |
| RAPGEF5            | 0.26                                  | NOG                | 3.25                                  |
| VIPR1              | 0.26                                  | RBM8A              | 3.25                                  |
| VSNL1              | 0.26                                  | EXOGEN             | 3.26                                  |
| ABCA12             | 0.27                                  | GCH1               | 3.26                                  |
| EGFR               | 0.27                                  | HSPH1              | 3.26                                  |
| IGFL1              | 0.27                                  | PUS7               | 3.26                                  |
| KLF5               | 0.27                                  | ZNF542             | 3.26                                  |
| PELI1              | 0.27                                  | GDAP1              | 3.27                                  |
| PRDM1              | 0.27                                  | GRSF1              | 3.27                                  |
| PRSS3              | 0.27                                  | HSPA8              | 3.27                                  |
| PVRL4              | 0.27                                  | SETD6              | 3.27                                  |
| RLF                | 0.27                                  | DBR1               | 3.28                                  |
| SPON2              | 0.27                                  | WDR4               | 3.28                                  |
| TPPP3              | 0.27                                  | ZCCHC10            | 3.29                                  |
| BLNK               | 0.28                                  | BEND3              | 3.30                                  |
| C15orf59           | 0.28                                  | COL4A2             | 3.30                                  |
| CES2               | 0.28                                  | LSM5               | 3.30                                  |
| DGAT2              | 0.28                                  | SFRS18             | 3.30                                  |
| EML1               | 0.28                                  | SLC25A13           | 3.31                                  |
| ERRFI1             | 0.28                                  | ABCC10             | 3.32                                  |
| FAM59A             | 0.28                                  | MDM1               | 3.32                                  |
| GPR146             | 0.28                                  | ZNF529             | 3.32                                  |
| IL1RN              | 0.28                                  | FEN1               | 3.33                                  |

| <b>Gene Symbol</b> | <b>Fold <math>\Delta</math> TP63i</b> | <b>Gene Symbol</b> | <b>Fold <math>\Delta</math> TP63i</b> |
|--------------------|---------------------------------------|--------------------|---------------------------------------|
| <i>IL33</i>        | 0.28                                  | <i>GNA12</i>       | 3.33                                  |
| <i>MXD1</i>        | 0.28                                  | <i>C6orf192</i>    | 3.34                                  |
| <i>NFATC2</i>      | 0.28                                  | <i>CBR4</i>        | 3.34                                  |
| <i>PDLIM5</i>      | 0.28                                  | <i>MDN1</i>        | 3.34                                  |
| <i>PGM2</i>        | 0.28                                  | <i>RUNX1</i>       | 3.34                                  |
| <i>PHYHIP</i>      | 0.28                                  | <i>DLD</i>         | 3.35                                  |
| <i>PRODH</i>       | 0.28                                  | <i>METTL13</i>     | 3.35                                  |
| <i>RAPGEFL1</i>    | 0.28                                  | <i>TRMT12</i>      | 3.35                                  |
| <i>SGPP2</i>       | 0.28                                  | <i>MAGEH1</i>      | 3.36                                  |
| <i>SH3RF2</i>      | 0.28                                  | <i>PRKCDBP</i>     | 3.36                                  |
| <i>STC2</i>        | 0.28                                  | <i>RBM15B</i>      | 3.36                                  |
| <i>TTC39A</i>      | 0.28                                  | <i>RNASEH1</i>     | 3.36                                  |
| <i>ASPM</i>        | 0.29                                  | <i>FAR1</i>        | 3.37                                  |
| <i>BTG3</i>        | 0.29                                  | <i>NAP1L5</i>      | 3.37                                  |
| <i>C18orf19</i>    | 0.29                                  | <i>NRK</i>         | 3.37                                  |
| <i>C5orf41</i>     | 0.29                                  | <i>KIAA1279</i>    | 3.38                                  |
| <i>CLDN1</i>       | 0.29                                  | <i>PFAS</i>        | 3.38                                  |
| <i>EGLN1</i>       | 0.29                                  | <i>HNRNPM</i>      | 3.40                                  |
| <i>EPAS1</i>       | 0.29                                  | <i>MALAT1</i>      | 3.40                                  |
| <i>EVPLL</i>       | 0.29                                  | <i>CHCHD7</i>      | 3.41                                  |
| <i>FAM83B</i>      | 0.29                                  | <i>GLT8D3</i>      | 3.41                                  |
| <i>FLJ40330</i>    | 0.29                                  | <i>TUBD1</i>       | 3.41                                  |
| <i>GNAI1</i>       | 0.29                                  | <i>RBM45</i>       | 3.42                                  |
| <i>HAL</i>         | 0.29                                  | <i>TRIM26</i>      | 3.42                                  |
| <i>IGFBP3</i>      | 0.29                                  | <i>C6orf114</i>    | 3.45                                  |
| <i>IL22RA1</i>     | 0.29                                  | <i>CTPS</i>        | 3.45                                  |
| <i>ITPRIP</i>      | 0.29                                  | <i>MCM6</i>        | 3.48                                  |
| <i>KLK13</i>       | 0.29                                  | <i>RPS24</i>       | 3.48                                  |
| <i>LASS3</i>       | 0.29                                  | <i>C14orf169</i>   | 3.49                                  |
| <i>LAYN</i>        | 0.29                                  | <i>C1orf151</i>    | 3.50                                  |
| <i>LOXL2</i>       | 0.29                                  | <i>CYP1B1</i>      | 3.50                                  |
| <i>LYST</i>        | 0.29                                  | <i>FECH</i>        | 3.50                                  |
| <i>NAMPT</i>       | 0.29                                  | <i>LPCAT1</i>      | 3.50                                  |
| <i>PLAUR</i>       | 0.29                                  | <i>LOC729991</i>   | 3.51                                  |
| <i>PSG7</i>        | 0.29                                  | <i>UTP15</i>       | 3.52                                  |
| <i>PTP4A1</i>      | 0.29                                  | <i>ZNF785</i>      | 3.52                                  |
| <i>RHBDL2</i>      | 0.29                                  | <i>ANUBL1</i>      | 3.53                                  |
| <i>SEMA4D</i>      | 0.29                                  | <i>DDX52</i>       | 3.53                                  |
| <i>SLC2A1</i>      | 0.29                                  | <i>POLR2K</i>      | 3.53                                  |
| <i>STEAP4</i>      | 0.29                                  | <i>NSD1</i>        | 3.54                                  |
| <i>TESK2</i>       | 0.29                                  | <i>HSPB11</i>      | 3.55                                  |
| <i>UBE2B</i>       | 0.29                                  | <i>PRPF38B</i>     | 3.55                                  |
| <i>ALDOC</i>       | 0.30                                  | <i>ZNF107</i>      | 3.55                                  |
| <i>ATP8B3</i>      | 0.30                                  | <i>ZNF300</i>      | 3.55                                  |
| <i>DAPP1</i>       | 0.30                                  | <i>C1orf93</i>     | 3.56                                  |
| <i>GAB1</i>        | 0.30                                  | <i>TRIM21</i>      | 3.56                                  |
| <i>GDA</i>         | 0.30                                  | <i>TTC14</i>       | 3.56                                  |
| <i>GJA3</i>        | 0.30                                  | <i>OTUD6B</i>      | 3.57                                  |
| <i>GNAO1</i>       | 0.30                                  | <i>PIGW</i>        | 3.57                                  |
| <i>HDAC5</i>       | 0.30                                  | <i>ZNF271</i>      | 3.57                                  |
| <i>HIST1H2BC</i>   | 0.30                                  | <i>C6orf120</i>    | 3.58                                  |
| <i>HS3ST6</i>      | 0.30                                  | <i>PPID</i>        | 3.58                                  |
| <i>JPH2</i>        | 0.30                                  | <i>SLC26A2</i>     | 3.58                                  |

| <b>Gene Symbol</b> | <b>Fold <math>\Delta</math> TP63i</b> | <b>Gene Symbol</b> | <b>Fold <math>\Delta</math> TP63i</b> |
|--------------------|---------------------------------------|--------------------|---------------------------------------|
| LY6G6C             | 0.30                                  | ZNF232             | 3.59                                  |
| MTUS1              | 0.30                                  | ZNF512B            | 3.59                                  |
| PCSK6              | 0.30                                  | MRPS23             | 3.60                                  |
| PDZK1IP1           | 0.30                                  | PSMD12             | 3.61                                  |
| TDRD9              | 0.30                                  | FAM119A            | 3.62                                  |
| C1orf213           | 0.31                                  | LSG1               | 3.62                                  |
| C4orf47            | 0.31                                  | PARP12             | 3.62                                  |
| CEL                | 0.31                                  | PHLPP2             | 3.62                                  |
| CLK1               | 0.31                                  | SLC25A44           | 3.62                                  |
| COL12A1            | 0.31                                  | C3orf38            | 3.63                                  |
| HIST1H2BG          | 0.31                                  | CFL2               | 3.63                                  |
| PIR                | 0.31                                  | GPAM               | 3.63                                  |
| PPP1R3B            | 0.31                                  | B3GALNT1           | 3.64                                  |
| RAB27B             | 0.31                                  | CACHD1             | 3.64                                  |
| RASSF5             | 0.31                                  | DDX50              | 3.64                                  |
| SYT7               | 0.31                                  | GPR39              | 3.64                                  |
| TNFRSF11A          | 0.31                                  | L1TD1              | 3.64                                  |
| TP53AIP1           | 0.31                                  | LACTB2             | 3.64                                  |
| ZNF292             | 0.31                                  | APCDD1             | 3.65                                  |
| DHRS3              | 0.32                                  | CHML               | 3.65                                  |
| FOXP3              | 0.32                                  | DDX31              | 3.65                                  |
| GALNT5             | 0.32                                  | LOC65998           | 3.65                                  |
| HIST1H2AE          | 0.32                                  | FAM173B            | 3.66                                  |
| HSPB8              | 0.32                                  | TMEM98             | 3.66                                  |
| KCNG1              | 0.32                                  | ZNHIT6             | 3.67                                  |
| KLHDC8B            | 0.32                                  | DCAF13             | 3.68                                  |
| KLHL24             | 0.32                                  | SIN3A              | 3.68                                  |
| MPP7               | 0.32                                  | PHF15              | 3.69                                  |
| NDRG1              | 0.32                                  | CCNJ               | 3.71                                  |
| PGLYRP4            | 0.32                                  | MCM3               | 3.71                                  |
| POU2F3             | 0.32                                  | C16orf88           | 3.72                                  |
| SERPINE1           | 0.32                                  | PSME3              | 3.73                                  |
| SH3KBP1            | 0.32                                  | ERCC4              | 3.74                                  |
| TACC2              | 0.32                                  | NADK               | 3.74                                  |
| UPK1B              | 0.32                                  | SAMHD1             | 3.74                                  |
| AGR2               | 0.33                                  | ZNF280B            | 3.76                                  |
| ANKRD22            | 0.33                                  | TBC1D16            | 3.77                                  |
| ARHGAP30           | 0.33                                  | ZC3HAV1            | 3.77                                  |
| C20orf111          | 0.33                                  | C7orf49            | 3.79                                  |
| DEGS2              | 0.33                                  | DDX20              | 3.79                                  |
| GJA1               | 0.33                                  | ENY2               | 3.79                                  |
| HERC3              | 0.33                                  | ING3               | 3.80                                  |
| HS3ST3A1           | 0.33                                  | ANAPC7             | 3.81                                  |
| HSPC159            | 0.33                                  | JRKL               | 3.81                                  |
| IL1F10             | 0.33                                  | PSPC1              | 3.81                                  |
| NAV2               | 0.33                                  | GPATCH2            | 3.82                                  |
| NCK1               | 0.33                                  | TUG1               | 3.83                                  |
| NDRG2              | 0.33                                  | PNO1               | 3.84                                  |
| PPFIBP1            | 0.33                                  | SLC5A6             | 3.84                                  |
| PRRT1              | 0.33                                  | GPATCH4            | 3.85                                  |
| RXRA               | 0.33                                  | PCNA               | 3.85                                  |
| SEMA6A             | 0.33                                  | RBM12              | 3.85                                  |
| SPRR4              | 0.33                                  | TRIM14             | 3.86                                  |

| <b>Gene Symbol</b> | <b>Fold Δ TP63i</b> | <b>Gene Symbol</b>  | <b>Fold Δ TP63i</b> |
|--------------------|---------------------|---------------------|---------------------|
| <i>TP73</i>        | 0.33                | <i>MGC16385</i>     | 3.87                |
| <i>WEE1</i>        | 0.33                | <i>MMP2</i>         | 3.88                |
| <i>ZC3H6</i>       | 0.33                | <i>DYX1C1</i>       | 3.90                |
| <i>ZFP36L1</i>     | 0.33                | <i>MEST</i>         | 3.90                |
| <i>ADAP2</i>       | 0.34                | <i>ATP6V1C1</i>     | 3.91                |
| <i>BBOX1</i>       | 0.34                | <i>LOC100132815</i> | 3.92                |
| <i>CDC42EP5</i>    | 0.34                | <i>NAT11</i>        | 3.93                |
| <i>CLDND1</i>      | 0.34                | <i>CREB5</i>        | 3.94                |
| <i>DUOXA1</i>      | 0.34                | <i>RPL27A</i>       | 3.95                |
| <i>LEPR</i>        | 0.34                | <i>SFRS2B</i>       | 3.95                |
| <i>LOC284023</i>   | 0.34                | <i>CSTF2T</i>       | 3.96                |
| <i>MAP3K8</i>      | 0.34                | <i>TSC22D1</i>      | 3.96                |
| <i>NCRNA00113</i>  | 0.34                | <i>LOC90784</i>     | 3.97                |
| <i>USP2</i>        | 0.34                | <i>FAM86B1</i>      | 4.00                |
| <i>CLCN5</i>       | 0.35                | <i>TMTC4</i>        | 4.06                |
| <i>CYP1A1</i>      | 0.35                | <i>KRT19</i>        | 4.07                |
| <i>DHRS9</i>       | 0.35                | <i>CLDN8</i>        | 4.08                |
| <i>DHX40</i>       | 0.35                | <i>ZNF268</i>       | 4.08                |
| <i>DSC3</i>        | 0.35                | <i>C1orf135</i>     | 4.09                |
| <i>EPS8L1</i>      | 0.35                | <i>DBN1</i>         | 4.10                |
| <i>G0S2</i>        | 0.35                | <i>DGCR8</i>        | 4.12                |
| <i>HES1</i>        | 0.35                | <i>SLC38A6</i>      | 4.12                |
| <i>HIST1H2BD</i>   | 0.35                | <i>DNAJA1</i>       | 4.13                |
| <i>IL1R2</i>       | 0.35                | <i>NUP98</i>        | 4.14                |
| <i>IL6R</i>        | 0.35                | <i>C7orf42</i>      | 4.15                |
| <i>IRS2</i>        | 0.35                | <i>TSPYL4</i>       | 4.16                |
| <i>KRT10</i>       | 0.35                | <i>G3BP2</i>        | 4.17                |
| <i>MTSS1L</i>      | 0.35                | <i>MSH2</i>         | 4.19                |
| <i>PER2</i>        | 0.35                | <i>ACPL2</i>        | 4.20                |
| <i>PPARD</i>       | 0.35                | <i>BHLHE41</i>      | 4.20                |
| <i>PRSS27</i>      | 0.35                | <i>C15orf37</i>     | 4.21                |
| <i>SKP2</i>        | 0.35                | <i>COL4A1</i>       | 4.21                |
| <i>SLC22A15</i>    | 0.35                | <i>MSTO1</i>        | 4.25                |
| <i>SNRK</i>        | 0.35                | <i>C9orf64</i>      | 4.26                |
| <i>UNC84A</i>      | 0.35                | <i>TMEM177</i>      | 4.26                |
| <i>B3GNT8</i>      | 0.36                | <i>IKBKB</i>        | 4.28                |
| <i>C21orf91</i>    | 0.36                | <i>LOC150759</i>    | 4.28                |
| <i>C7orf70</i>     | 0.36                | <i>LOC100132418</i> | 4.29                |
| <i>C9orf169</i>    | 0.36                | <i>RUNDC1</i>       | 4.29                |
| <i>CARD14</i>      | 0.36                | <i>CTSD</i>         | 4.31                |
| <i>CDC2L6</i>      | 0.36                | <i>PLEKHA3</i>      | 4.33                |
| <i>CENPF</i>       | 0.36                | <i>TCF12</i>        | 4.33                |
| <i>CLIP1</i>       | 0.36                | <i>CLCC1</i>        | 4.42                |
| <i>DSG3</i>        | 0.36                | <i>ZNF329</i>       | 4.45                |
| <i>FEM1C</i>       | 0.36                | <i>TMEM5</i>        | 4.51                |
| <i>FRY</i>         | 0.36                | <i>ZNF20</i>        | 4.51                |
| <i>LIN7B</i>       | 0.36                | <i>IFI35</i>        | 4.53                |
| <i>MXRA5</i>       | 0.36                | <i>TTC30B</i>       | 4.54                |
| <i>NOL3</i>        | 0.36                | <i>C1orf216</i>     | 4.58                |
| <i>PDZD2</i>       | 0.36                | <i>CBX6</i>         | 4.58                |
| <i>PER1</i>        | 0.36                | <i>MAT2A</i>        | 4.59                |
| <i>PLCXD1</i>      | 0.36                | <i>RNF207</i>       | 4.61                |
| <i>PLD1</i>        | 0.36                | <i>POLR3K</i>       | 4.63                |

| <b>Gene Symbol</b> | <b>Fold <math>\Delta</math> TP63i</b> | <b>Gene Symbol</b> | <b>Fold <math>\Delta</math> TP63i</b> |
|--------------------|---------------------------------------|--------------------|---------------------------------------|
| <i>RDH13</i>       | 0.36                                  | <i>SOCS4</i>       | 4.64                                  |
| <i>SLC6A15</i>     | 0.36                                  | <i>PMEPA1</i>      | 4.65                                  |
| <i>TCP11L2</i>     | 0.36                                  | <i>ZNF322A</i>     | 4.66                                  |
| <i>VGLL3</i>       | 0.36                                  | <i>ZNF92</i>       | 4.68                                  |
| <i>ZNF846</i>      | 0.36                                  | <i>ZNF826</i>      | 4.70                                  |
| <i>ANXA1</i>       | 0.37                                  | <i>DHFRL1</i>      | 4.71                                  |
| <i>BCO2</i>        | 0.37                                  | <i>ZNF789</i>      | 4.73                                  |
| <i>CRYAB</i>       | 0.37                                  | <i>C12orf5</i>     | 4.74                                  |
| <i>CSNK1A1</i>     | 0.37                                  | <i>DDHD1</i>       | 4.74                                  |
| <i>DLG4</i>        | 0.37                                  | <i>AFG3L1</i>      | 4.75                                  |
| <i>DOCK4</i>       | 0.37                                  | <i>HEATR3</i>      | 4.76                                  |
| <i>EPHB3</i>       | 0.37                                  | <i>ZNF814</i>      | 4.80                                  |
| <i>FAM126A</i>     | 0.37                                  | <i>GFM1</i>        | 4.83                                  |
| <i>FAM57A</i>      | 0.37                                  | <i>SLC38A9</i>     | 4.85                                  |
| <i>KAT2B</i>       | 0.37                                  | <i>C9orf3</i>      | 4.86                                  |
| <i>KLK1</i>        | 0.37                                  | <i>ZNF347</i>      | 4.86                                  |
| <i>MPZL3</i>       | 0.37                                  | <i>RANBP6</i>      | 4.88                                  |
| <i>P4HA1</i>       | 0.37                                  | <i>ZNF226</i>      | 4.89                                  |
| <i>PIGA</i>        | 0.37                                  | <i>ZNF311</i>      | 4.91                                  |
| <i>SLC44A1</i>     | 0.37                                  | <i>ZNF451</i>      | 5.01                                  |
| <i>TPBG</i>        | 0.37                                  | <i>POSTN</i>       | 5.02                                  |
| <i>ZBTB43</i>      | 0.37                                  | <i>RBM12B</i>      | 5.05                                  |
| <i>ABLIM2</i>      | 0.38                                  | <i>RHOB</i>        | 5.05                                  |
| <i>BMP2K</i>       | 0.38                                  | <i>SLFN12</i>      | 5.09                                  |
| <i>CHP2</i>        | 0.38                                  | <i>NCOA5</i>       | 5.15                                  |
| <i>CITED2</i>      | 0.38                                  | <i>THBS1</i>       | 5.19                                  |
| <i>CREG1</i>       | 0.38                                  | <i>ATR</i>         | 5.21                                  |
| <i>CSRNP1</i>      | 0.38                                  | <i>CCND1</i>       | 5.26                                  |
| <i>FNTB</i>        | 0.38                                  | <i>EPM2AIP1</i>    | 5.30                                  |
| <i>GRAMD3</i>      | 0.38                                  | <i>HOXA10</i>      | 5.34                                  |
| <i>HIVEP2</i>      | 0.38                                  | <i>IFIT5</i>       | 5.34                                  |
| <i>KDM3A</i>       | 0.38                                  | <i>DDX58</i>       | 5.37                                  |
| <i>MGEA5</i>       | 0.38                                  | <i>TBC1D24</i>     | 5.38                                  |
| <i>MME</i>         | 0.38                                  | <i>TRIM68</i>      | 5.41                                  |
| <i>MTSS1</i>       | 0.38                                  | <i>RLN2</i>        | 5.42                                  |
| <i>PALMD</i>       | 0.38                                  | <i>TRNT1</i>       | 5.42                                  |
| <i>PARD6B</i>      | 0.38                                  | <i>PNPT1</i>       | 5.46                                  |
| <i>PHLDB3</i>      | 0.38                                  | <i>NAT1</i>        | 5.51                                  |
| <i>POLR1D</i>      | 0.38                                  | <i>GALNT6</i>      | 5.52                                  |
| <i>RIOK3</i>       | 0.38                                  | <i>LOC134466</i>   | 5.55                                  |
| <i>SEPT3</i>       | 0.38                                  | <i>MX2</i>         | 5.55                                  |
| <i>SERPINB13</i>   | 0.38                                  | <i>MYEF2</i>       | 5.58                                  |
| <i>SULT2B1</i>     | 0.38                                  | <i>MX1</i>         | 5.62                                  |
| <i>TNFAIP8</i>     | 0.38                                  | <i>ZNF544</i>      | 5.73                                  |
| <i>WBP2</i>        | 0.38                                  | <i>MRPS14</i>      | 5.77                                  |
| <i>ANKRD12</i>     | 0.39                                  | <i>ZNF70</i>       | 5.90                                  |
| <i>CAMK2D</i>      | 0.39                                  | <i>RNFT1</i>       | 5.91                                  |
| <i>CRISPLD2</i>    | 0.39                                  | <i>FBXL16</i>      | 6.07                                  |
| <i>CUL4B</i>       | 0.39                                  | <i>RHOBTB1</i>     | 6.22                                  |
| <i>CYP4F12</i>     | 0.39                                  | <i>TRAF5</i>       | 6.24                                  |
| <i>EFNA1</i>       | 0.39                                  | <i>ISG15</i>       | 6.33                                  |
| <i>GOLGA7B</i>     | 0.39                                  | <i>MTERFD3</i>     | 6.45                                  |
| <i>GRHL1</i>       | 0.39                                  | <i>C17orf91</i>    | 6.48                                  |



| <b>Gene Symbol</b> | <b>Fold <math>\Delta</math> TP63i</b> | <b>Gene Symbol</b> | <b>Fold <math>\Delta</math> TP63i</b> |
|--------------------|---------------------------------------|--------------------|---------------------------------------|
| <i>INSIG2</i>      | 0.39                                  | <i>ELAC1</i>       | 6.55                                  |
| <i>KLK8</i>        | 0.39                                  | <i>GSPT2</i>       | 6.59                                  |
| <i>MPHOSPH9</i>    | 0.39                                  | <i>ELF3</i>        | 6.63                                  |
| <i>PIM3</i>        | 0.39                                  | <i>ZNF302</i>      | 6.63                                  |
| <i>PRRG4</i>       | 0.39                                  | <i>PLS1</i>        | 6.90                                  |
| <i>RNF141</i>      | 0.39                                  | <i>ZNF260</i>      | 7.09                                  |
| <i>RYBP</i>        | 0.39                                  | <i>HERC6</i>       | 7.24                                  |
| <i>SHF</i>         | 0.39                                  | <i>PRMT6</i>       | 7.39                                  |
| <i>SIAH2</i>       | 0.39                                  | <i>ZNF167</i>      | 7.39                                  |
| <i>SLC22A23</i>    | 0.39                                  | <i>SLC46A3</i>     | 7.95                                  |
| <i>TMEM91</i>      | 0.39                                  | <i>ZBTB26</i>      | 7.99                                  |
| <i>UNQ1887</i>     | 0.39                                  | <i>IFIT3</i>       | 8.20                                  |
| <i>YPEL2</i>       | 0.39                                  | <i>EPCAM</i>       | 8.39                                  |
| <i>CFLAR</i>       | 0.40                                  | <i>EPS8</i>        | 8.60                                  |
| <i>CLK4</i>        | 0.40                                  | <i>PRICKLE1</i>    | 8.68                                  |
| <i>D4S234E</i>     | 0.40                                  | <i>HOTAIR</i>      | 8.81                                  |
| <i>DIAPH3</i>      | 0.40                                  | <i>PIK3R3</i>      | 9.05                                  |
| <i>FOSL2</i>       | 0.40                                  | <i>IFIT1</i>       | 9.07                                  |
| <i>KLF9</i>        | 0.40                                  | <i>SAMD9L</i>      | 9.84                                  |
| <i>KRT78</i>       | 0.40                                  | <i>EPHX4</i>       | 9.91                                  |
| <i>LCORL</i>       | 0.40                                  | <i>SULT1E1</i>     | 11.62                                 |
| <i>MNT</i>         | 0.40                                  | <i>CMPK2</i>       | 12.68                                 |
| <i>MPZL2</i>       | 0.40                                  | <i>DDAH1</i>       | 12.86                                 |
| <i>PDCD4</i>       | 0.40                                  | <i>XAF1</i>        | 14.76                                 |
| <i>PPP1R2</i>      | 0.40                                  | <i>MEIS3P1</i>     | 15.21                                 |
| <i>SLC25A25</i>    | 0.40                                  | <i>SLC40A1</i>     | 15.29                                 |
| <i>SMPDL3A</i>     | 0.40                                  |                    |                                       |

**Table S6. Overlap of TP63 AEC Mutant and TP63i Gene Sets**

| <b>Gene Symbol</b> | <b>Fold Δ TP63i</b> | <b>Fold Δ p.Ile482Thr</b> | <b>Fold Δ p.Arg500Pro</b> |
|--------------------|---------------------|---------------------------|---------------------------|
| <i>AADAACL2</i>    | 0.05                | 0.093                     | 0.046                     |
| <i>ABCA12</i>      | 0.27                | 0.261                     | 0.307                     |
| <i>ABCG1</i>       | 0.07                | 0.240                     | 0.316                     |
| <i>ACPL2</i>       | 4.20                | 3.254                     | 2.718                     |
| <i>ADAP2</i>       | 0.34                | 0.112                     | 0.143                     |
| <i>ADM</i>         | 0.17                | 0.313                     | 0.516                     |
| <i>AKR1C3</i>      | 0.22                | 2.351                     | 2.292                     |
| <i>ALDOC</i>       | 0.30                | 0.446                     | 0.480                     |
| <i>ALOX12B</i>     | 0.04                | 0.081                     | 0.087                     |
| <i>ALOXE3</i>      | 0.20                | 0.166                     | 0.137                     |
| <i>AMPD3</i>       | 0.22                | 0.383                     | 0.439                     |
| <i>ANGPTL4</i>     | 0.12                | 0.476                     | 0.429                     |
| <i>ANKRD22</i>     | 0.33                | 0.296                     | 0.293                     |
| <i>ANKRD35</i>     | 0.23                | 0.371                     | 0.514                     |
| <i>AQP9</i>        | 0.21                | 0.166                     | 0.170                     |
| <i>ASPRV1</i>      | 0.17                | 0.053                     | 0.025                     |
| <i>ATP10B</i>      | 0.14                | 0.114                     | 0.127                     |
| <i>ATP2C2</i>      | 0.20                | 0.291                     | 0.360                     |
| <i>ATP6V1C2</i>    | 0.10                | 0.098                     | 0.088                     |
| <i>AVPI1</i>       | 0.12                | 0.334                     | 0.307                     |
| <i>BBOX1</i>       | 0.34                | 0.244                     | 0.270                     |
| <i>BCO2</i>        | 0.37                | 0.318                     | 0.479                     |
| <i>BID</i>         | 2.94                | 2.490                     | 1.905                     |
| <i>BPIL2</i>       | 0.07                | 0.095                     | 0.106                     |
| <i>C10orf99</i>    | 0.00                | 0.052                     | 0.099                     |
| <i>C13orf23</i>    | 2.67                | 2.076                     | 1.916                     |
| <i>C15orf59</i>    | 0.28                | 0.327                     | 0.431                     |
| <i>C9orf169</i>    | 0.36                | 0.435                     | 0.434                     |
| <i>CA12</i>        | 0.18                | 0.434                     | 0.530                     |
| <i>CACHD1</i>      | 3.64                | 3.080                     | 3.181                     |
| <i>CARD14</i>      | 0.36                | 0.371                     | 0.407                     |
| <i>CARD18</i>      | 0.05                | 0.264                     | 0.288                     |
| <i>CCND1</i>       | 5.26                | 3.597                     | 3.267                     |
| <i>CDH16</i>       | 0.15                | 2.269                     | 2.462                     |
| <i>CHCHD7</i>      | 3.41                | 2.112                     | 1.845                     |
| <i>CHML</i>        | 3.65                | 2.468                     | 2.191                     |
| <i>CHP2</i>        | 0.38                | 0.428                     | 0.419                     |
| <i>CITED2</i>      | 0.38                | 0.340                     | 0.319                     |
| <i>CLCN5</i>       | 0.35                | 0.541                     | 0.548                     |

| <b>Gene Symbol</b> | <b>Fold Δ TP63i</b> | <b>Fold Δ p.Ile482Thr</b> | <b>Fold Δ p.Arg500Pro</b> |
|--------------------|---------------------|---------------------------|---------------------------|
| <i>CLDN1</i>       | 0.29                | 0.518                     | 0.548                     |
| <i>CNFN</i>        | 0.07                | 0.163                     | 0.125                     |
| <i>CPM</i>         | 0.20                | 0.161                     | 0.129                     |
| <i>CRCT1</i>       | 0.02                | 0.044                     | 0.044                     |
| <i>CREG1</i>       | 0.38                | 0.354                     | 0.442                     |
| <i>CRYAB</i>       | 0.37                | 0.151                     | 0.184                     |
| <i>CTSD</i>        | 4.31                | 0.343                     | 0.358                     |
| <i>CYP1B1</i>      | 3.50                | 16.547                    | 9.298                     |
| <i>CYP4F22</i>     | 0.14                | 0.114                     | 0.096                     |
| <i>CYP4F3</i>      | 0.14                | 3.119                     | 5.908                     |
| <i>DDAH1</i>       | 12.86               | 3.803                     | 3.079                     |
| <i>DEGS2</i>       | 0.33                | 0.276                     | 0.252                     |
| <i>DENND2C</i>     | 0.25                | 0.464                     | 0.480                     |
| <i>DGAT2</i>       | 0.28                | 0.207                     | 0.210                     |
| <i>DHRS9</i>       | 0.35                | 0.091                     | 0.059                     |
| <i>DIRC3</i>       | 0.26                | 0.541                     | 0.521                     |
| <i>DLX5</i>        | 0.19                | 0.324                     | 0.272                     |
| <i>DMKN</i>        | 0.16                | 0.498                     | 0.510                     |
| <i>DSC1</i>        | 0.05                | 0.054                     | 0.057                     |
| <i>DSG1</i>        | 0.10                | 0.399                     | 0.462                     |
| <i>DUOXA1</i>      | 0.34                | 0.259                     | 0.382                     |
| <i>DUSP1</i>       | 0.06                | 0.209                     | 0.198                     |
| <i>EEF2K</i>       | 2.63                | 1.985                     | 1.966                     |
| <i>EGLN3</i>       | 0.04                | 0.335                     | 0.332                     |
| <i>EGR3</i>        | 0.16                | 0.237                     | 0.250                     |
| <i>ELF3</i>        | 6.63                | 2.005                     | 2.211                     |
| <i>ELOVL4</i>      | 0.11                | 0.277                     | 0.291                     |
| <i>ELOVL7</i>      | 0.12                | 0.323                     | 0.334                     |
| <i>EML1</i>        | 0.28                | 0.455                     | 0.416                     |
| <i>EPCAM</i>       | 8.39                | 8.758                     | 6.405                     |
| <i>EPHX3</i>       | 0.18                | 0.406                     | 0.434                     |
| <i>EPS8L1</i>      | 0.35                | 0.322                     | 0.449                     |
| <i>EXPH5</i>       | 0.23                | 0.287                     | 0.376                     |
| <i>FABP7</i>       | 0.05                | 0.155                     | 0.171                     |
| <i>FAM89A</i>      | 0.23                | 0.360                     | 0.325                     |
| <i>FLG</i>         | 0.08                | 0.135                     | 0.143                     |
| <i>FLG2</i>        | 0.11                | 0.048                     | 0.026                     |
| <i>FLJ40330</i>    | 0.29                | 0.446                     | 0.499                     |
| <i>FNIP2</i>       | 0.17                | 0.485                     | 0.468                     |
| <i>FNTB</i>        | 0.38                | 0.471                     | 0.474                     |
| <i>FRY</i>         | 0.36                | 0.220                     | 0.305                     |

| <b>Gene Symbol</b> | <b>Fold Δ TP63i</b> | <b>Fold Δ p.Ile482Thr</b> | <b>Fold Δ p.Arg500Pro</b> |
|--------------------|---------------------|---------------------------|---------------------------|
| <i>FZD10</i>       | 0.19                | 2.241                     | 2.294                     |
| <i>GBP6</i>        | 0.14                | 0.214                     | 0.232                     |
| <i>GDA</i>         | 0.30                | 0.387                     | 0.549                     |
| <i>GDPD3</i>       | 0.20                | 0.315                     | 0.445                     |
| <i>GJB6</i>        | 0.21                | 0.372                     | 0.344                     |
| <i>GLTP</i>        | 0.14                | 0.284                     | 0.304                     |
| <i>GNAI1</i>       | 0.29                | 0.525                     | 0.446                     |
| <i>GORAB</i>       | 3.21                | 2.011                     | 1.824                     |
| <i>GPX3</i>        | 0.13                | 0.161                     | 0.184                     |
| <i>GRHL1</i>       | 0.39                | 0.297                     | 0.359                     |
| <i>GRHL3</i>       | 0.20                | 0.404                     | 0.477                     |
| <i>GRSF1</i>       | 3.27                | 2.144                     | 1.797                     |
| <i>H19</i>         | 0.16                | 0.345                     | 0.533                     |
| <i>HAL</i>         | 0.29                | 0.064                     | 0.018                     |
| <i>HIST1H2BG</i>   | 0.31                | 0.549                     | 0.471                     |
| <i>HK2</i>         | 0.15                | 0.335                     | 0.373                     |
| <i>HMOX1</i>       | 0.22                | 0.055                     | 0.073                     |
| <i>HOPX</i>        | 0.08                | 0.343                     | 0.301                     |
| <i>HOTAIR</i>      | 8.81                | 2.381                     | 2.449                     |
| <i>HS3ST6</i>      | 0.30                | 0.226                     | 0.291                     |
| <i>HSPB8</i>       | 0.32                | 0.124                     | 0.164                     |
| <i>HSPC159</i>     | 0.33                | 0.301                     | 0.367                     |
| <i>IGFBP3</i>      | 0.29                | 4.876                     | 3.041                     |
| <i>IGFL1</i>       | 0.27                | 4.297                     | 3.642                     |
| <i>IL1F10</i>      | 0.33                | 0.198                     | 0.197                     |
| <i>IL1F5</i>       | 0.08                | 0.181                     | 0.138                     |
| <i>IL1F9</i>       | 0.04                | 0.145                     | 0.083                     |
| <i>IL1R2</i>       | 0.35                | 0.278                     | 0.138                     |
| <i>IL22RA1</i>     | 0.29                | 0.383                     | 0.394                     |
| <i>JHDM1D</i>      | 0.20                | 0.533                     | 0.500                     |
| <i>KDM3A</i>       | 0.38                | 0.461                     | 0.537                     |
| <i>KIAA1239</i>    | 0.18                | 0.348                     | 0.459                     |
| <i>KLF4</i>        | 0.26                | 0.545                     | 0.494                     |
| <i>KLF9</i>        | 0.40                | 2.041                     | 1.825                     |
| <i>KLK13</i>       | 0.29                | 0.152                     | 0.156                     |
| <i>KRT1</i>        | 0.04                | 0.237                     | 0.239                     |
| <i>KRT19</i>       | 4.07                | 17.432                    | 22.278                    |
| <i>KRT23</i>       | 0.10                | 0.113                     | 0.137                     |
| <i>KRT24</i>       | 0.12                | 4.093                     | 4.819                     |
| <i>KRT4</i>        | 0.26                | 16.984                    | 31.735                    |
| <i>KRT7</i>        | 2.65                | 9.860                     | 13.032                    |

| <b>Gene Symbol</b> | <b>Fold Δ TP63i</b> | <b>Fold Δ p.Ile482Thr</b> | <b>Fold Δ p.Arg500Pro</b> |
|--------------------|---------------------|---------------------------|---------------------------|
| <i>KRT77</i>       | 0.08                | 0.131                     | 0.270                     |
| <i>KRT78</i>       | 0.40                | 0.226                     | 0.243                     |
| <i>LASS3</i>       | 0.29                | 0.189                     | 0.229                     |
| <i>LCE3D</i>       | 0.02                | 0.027                     | 0.019                     |
| <i>LOC147645</i>   | 0.23                | 0.158                     | 0.230                     |
| <i>LOC283404</i>   | 0.11                | 0.305                     | 0.246                     |
| <i>LOC284023</i>   | 0.34                | 0.515                     | 0.433                     |
| <i>LOC645638</i>   | 0.19                | 0.390                     | 0.335                     |
| <i>LOC729994</i>   | 0.11                | 0.366                     | 0.422                     |
| <i>LY6G6C</i>      | 0.30                | 0.168                     | 0.167                     |
| <i>LYNX1</i>       | 0.21                | 0.329                     | 0.414                     |
| <i>LYPD5</i>       | 0.18                | 0.071                     | 0.075                     |
| <i>MARCH3</i>      | 0.06                | 0.127                     | 0.140                     |
| <i>MPZL3</i>       | 0.37                | 0.345                     | 0.348                     |
| <i>MXD1</i>        | 0.28                | 0.416                     | 0.364                     |
| <i>MXRA5</i>       | 0.36                | 1.914                     | 2.206                     |
| <i>NDUFA4L2</i>    | 0.18                | 0.301                     | 0.310                     |
| <i>NEK4</i>        | 2.64                | 1.871                     | 1.996                     |
| <i>NFATC2</i>      | 0.28                | 0.186                     | 0.309                     |
| <i>NIACR2</i>      | 0.11                | 0.474                     | 0.430                     |
| <i>NIPAL4</i>      | 0.08                | 0.354                     | 0.374                     |
| <i>NMU</i>         | 0.21                | 0.165                     | 0.202                     |
| <i>OVOL1</i>       | 0.15                | 0.278                     | 0.237                     |
| <i>PAQR5</i>       | 0.13                | 0.326                     | 0.368                     |
| <i>PBX1</i>        | 3.05                | 2.538                     | 2.554                     |
| <i>PCDH21</i>      | 0.09                | 0.483                     | 0.556                     |
| <i>PCSK6</i>       | 0.30                | 0.271                     | 0.282                     |
| <i>PDZD2</i>       | 0.36                | 0.488                     | 0.451                     |
| <i>PDZK1IP1</i>    | 0.30                | 0.251                     | 0.257                     |
| <i>PGF</i>         | 0.12                | 0.361                     | 0.352                     |
| <i>PI3</i>         | 0.03                | 0.554                     | 0.494                     |
| <i>PIK3R3</i>      | 9.05                | 3.717                     | 3.027                     |
| <i>PIM1</i>        | 0.21                | 0.376                     | 0.352                     |
| <i>PLA2G3</i>      | 0.16                | 0.261                     | 0.291                     |
| <i>PLCXD1</i>      | 0.36                | 0.318                     | 0.405                     |
| <i>PNPLA1</i>      | 0.18                | 0.326                     | 0.286                     |
| <i>POF1B</i>       | 0.21                | 0.270                     | 0.316                     |
| <i>PPARD</i>       | 0.35                | 0.389                     | 0.435                     |
| <i>PRDM1</i>       | 0.27                | 0.499                     | 0.353                     |
| <i>PRSS27</i>      | 0.35                | 0.319                     | 0.330                     |
| <i>PSG7</i>        | 0.29                | 0.406                     | 0.382                     |

| <b>Gene Symbol</b> | <b>Fold Δ TP63i</b> | <b>Fold Δ p.Ile482Thr</b> | <b>Fold Δ p.Arg500Pro</b> |
|--------------------|---------------------|---------------------------|---------------------------|
| <i>PTGS2</i>       | 0.05                | 0.290                     | 0.293                     |
| <i>RAB11FIP1</i>   | 0.25                | 0.441                     | 0.536                     |
| <i>RAET1E</i>      | 0.15                | 0.243                     | 0.249                     |
| <i>RASGRP1</i>     | 0.15                | 0.323                     | 0.371                     |
| <i>RCAN1</i>       | 0.18                | 0.267                     | 0.277                     |
| <i>RDH12</i>       | 0.05                | 0.135                     | 0.133                     |
| <i>RGS2</i>        | 0.16                | 0.327                     | 0.303                     |
| <i>RNASE7</i>      | 0.12                | 0.029                     | 0.029                     |
| <i>RNF39</i>       | 0.11                | 0.157                     | 0.145                     |
| <i>RORA</i>        | 0.08                | 0.083                     | 0.086                     |
| <i>S100A12</i>     | 0.11                | 0.116                     | 0.055                     |
| <i>S100P</i>       | 0.16                | 14.267                    | 14.420                    |
| <i>SBSN</i>        | 0.06                | 0.176                     | 0.243                     |
| <i>SCNN1B</i>      | 0.10                | 0.245                     | 0.366                     |
| <i>SGPP2</i>       | 0.28                | 0.550                     | 0.445                     |
| <i>SLC15A1</i>     | 0.22                | 0.229                     | 0.241                     |
| <i>SLC5A1</i>      | 0.13                | 0.158                     | 0.138                     |
| <i>SLC6A14</i>     | 0.07                | 2.040                     | 3.815                     |
| <i>SLCO4A1</i>     | 0.08                | 0.273                     | 0.299                     |
| <i>SOX7</i>        | 0.10                | 0.308                     | 0.250                     |
| <i>SPON2</i>       | 0.27                | 4.203                     | 5.348                     |
| <i>SPRR2G</i>      | 0.15                | 0.014                     | 0.017                     |
| <i>SPRR3</i>       | 0.06                | 0.137                     | 0.108                     |
| <i>SPRR4</i>       | 0.33                | 0.128                     | 0.112                     |
| <i>SULT2B1</i>     | 0.38                | 0.404                     | 0.461                     |
| <i>TFRC</i>        | 2.63                | 2.649                     | 2.495                     |
| <i>TGM1</i>        | 0.08                | 0.179                     | 0.237                     |
| <i>TGM3</i>        | 0.40                | 0.140                     | 0.128                     |
| <i>TMEM45A</i>     | 0.40                | 0.537                     | 0.523                     |
| <i>TMTC1</i>       | 0.21                | 3.065                     | 2.316                     |
| <i>TNNT2</i>       | 0.25                | 0.308                     | 0.374                     |
| <i>TP53</i>        | 3.11                | 2.395                     | 1.803                     |
| <i>TPRG1</i>       | 0.05                | 0.398                     | 0.359                     |
| <i>TTC39A</i>      | 0.28                | 0.320                     | 0.378                     |
| <i>TTC39B</i>      | 0.24                | 0.542                     | 0.522                     |
| <i>UGCG</i>        | 0.15                | 0.409                     | 0.423                     |
| <i>UPK1B</i>       | 0.32                | 2.995                     | 2.836                     |
| <i>USP2</i>        | 0.34                | 0.186                     | 0.219                     |
| <i>WFDC12</i>      | 0.04                | 0.053                     | 0.048                     |
| <i>WFDC5</i>       | 0.01                | 0.052                     | 0.070                     |
| <i>ZFP36</i>       | 0.17                | 0.530                     | 0.547                     |

| <b>Gene Symbol</b> | <b>Fold <math>\Delta</math> <i>TP63i</i></b> | <b>Fold <math>\Delta</math> p.Ile482Thr</b> | <b>Fold <math>\Delta</math> p.Arg500Pro</b> |
|--------------------|----------------------------------------------|---------------------------------------------|---------------------------------------------|
| <i>ZNF107</i>      | 3.55                                         | 0.393                                       | 0.365                                       |
| <i>ZNF529</i>      | 3.32                                         | 2.502                                       | 2.219                                       |
| <i>ZNF750</i>      | 0.22                                         | 0.455                                       | 0.539                                       |

**Table S7. GSEA p Values for All Significant Associated Gene Sets**

| <b>GSEA Significant Gene Sets</b>                 | <b>p Value<br/>&lt;0.05</b> | <b>Model</b>         |
|---------------------------------------------------|-----------------------------|----------------------|
| genes_down_in_ <b>ZNF750</b> _kd                  | 1.31E-79                    | RNAi                 |
| genes_down_in_ <b>KLF4</b> _kd                    | 5.28E-50                    | RNAi                 |
| genes_down_in_ <b>IRF6</b> _ko                    | 3.70E-22                    | Knock-out            |
| genes_down_in_ <b>GRHL3</b> _ko                   | 1.11E-20                    | Knock-out            |
| genes_down_in_ <b>CEBPa/b</b> _dko                | 9.09E-15                    | Compound knock-out   |
| genes_up_in_ <b>EFNA</b> _oe                      | 8.70E-14                    | Overexpression       |
| genes_down_in_ <b>CEBPa/b</b> _dbdmut             | 9.96E-13                    | DNA Bindig Mutants   |
| genes_up_in_ <b>ETS1</b> _oe                      | 1.93E-11                    | Overexpression       |
| genes_up_in_ <b>NOTCH1</b> _tg                    | 2.56E-11                    | Transgenic           |
| genes_down_in_ <b>CEBP/ab</b> _ <b>E2F</b> dbdmut | 2.01E-06                    | Overexpression       |
| genes_down_in_ <b>RBP130</b> _dko                 | 4.15E-05                    | Compound knock-out   |
| genes_up_in_ <b>TNFa</b> _48h                     | 2.77E-04                    | Cytokine stimulation |
| genes_down_in_ <b>NRC31</b> _ko2                  | 0.001451                    | Knock-out            |
| genes_down_in_ <b>CEBPd</b> _kd                   | 0.001920                    | RNAi                 |
| genes_up_in_ <b>GLI2</b> _oe                      | 0.007514                    | Overexpression       |
| genes_down_in_2d_ <b>TP63</b> _kd                 | 0.016120                    | RNAi                 |



**Table S8. Overlapping Genes form GSEA Significant Gene Sets**

| <b>ZNF750</b> | <b>KLF4</b> | <b>CEBPa/b</b> | <b>IRF6</b> | <b>ETS1</b> | <b>NOTCH</b> | <b>GRHL3</b> | <b>EFNA</b> |
|---------------|-------------|----------------|-------------|-------------|--------------|--------------|-------------|
| AADACL2       | ABCA12      | AQP9           | ALOXE3      | ABCG1       | ALDOC        | ATP6V1C2     | ABCA12      |
| ABCG1         | ABCG1       | ATP6V1C2       | ASPRV1      | ADM         | AMPD3        | BBOX1        | BBOX1       |
| ADAP2         | ADAP2       | BBOX1          | ATP6V1C2    | ANKRD22     | ASPRV1       | BPIL2        | CRYAB       |
| ADM           | ALOXE3      | BPIL2          | BPIL2       | ATP2C2      | C10orf99     | CLDN1        | DSC1        |
| ALOXE3        | AMPD3       | C10orf99       | C9orf169    | C10orf99    | CA12         | CPM          | DSG1        |
| AMPD3         | ANKRD22     | CPM            | CPM         | CA12        | CNFN         | DGAT2        | IL1F5       |
| AQP9          | ASPRV1      | DEGS2          | CRCT1       | CREG1       | CREG1        | EGR3         | KRT1        |
| ASPRV1        | ATP2C2      | DGAT2          | EPS8L1      | DEGS2       | CRYAB        | EPS8L1       | TGM1        |
| ATP10B        | ATP6V1C2    | ELOVL7         | FLG         | DUOXA1      | CTSD         | GDPD3        | TNNT2       |
| ATP2C2        | AVPI1       | EPS8L1         | HAL         | DUSP1       | DEGS2        | HAL          | ZNF750      |
| AVPI1         | C9orf169    | FAM89A         | HMOX1       | EGLN3       | DUOXA1       | HOPX         |             |
| BPIL2         | CARD18      | FLG            | HOPX        | GBP6        | EGLN3        | IL1F5        |             |
| C9orf169      | CITED2      | HAL            | HSPC159     | GDA         | ELOVL7       | KRT23        |             |
| CARD18        | CLCN5       | HMOX1          | IL1F5       | GJB6        | FAM89A       | LOC284023    |             |
| CITED2        | CNFN        | HSPB8          | IL1R2       | IL1R2       | FLG          | LYPD5        |             |
| CLCN5         | CPM         | IL1R2          | KRT23       | PDZK1IP1    | GDA          | RAB11FIP1    |             |
| CLDN1         | CRCT1       | KRT23          | KRT77       | PTGS2       | GJB6         | RDH12        |             |
| CNFN          | CYP4F22     | KRT77          | KRT78       | SLC5A1      | GRHL3        | SBSN         |             |
| CPM           | DENND2C     | LOC284023      | LOC284023   | TGM3        | HK2          |              |             |
| CRCT1         | DHRS9       | LOC645638      | PLCXD1      | UGCG        | HOPX         |              |             |
| CYP4F22       | EGR3        | LY6G6C         | PRDM1       | ZFP36       | HSPC159      |              |             |
| DENND2C       | ELOVL4      | LYNX1          | RAB11FIP1   |             |              |              |             |
| DHRS9         | ELOVL7      | PLCXD1         | RNF39       |             |              |              |             |
| DIRC3         | EPS8L1      | PNPLA1         | RORA        |             |              |              |             |
| EGR3          | FLG         | RAB11FIP1      | SBSN        |             |              |              |             |
| ELOVL4        | FLG2        | SLC15A1        | USP2        |             |              |              |             |
| ELOVL7        | GDA         | TGM3           |             |             |              |              |             |
| EPS8L1        | GDPD3       |                |             |             |              |              |             |
| EXPH5         | GPX3        |                |             |             |              |              |             |
| FLG           | HIST1H2BG   |                |             |             |              |              |             |
| FLG2          | HMOX1       |                |             |             |              |              |             |
| GDA           | HOPX        |                |             |             |              |              |             |
| GRHL1         | HSPB8       |                |             |             |              |              |             |
| HIST1H2BG     | IL1R2       |                |             |             |              |              |             |
| HK2           | JHDM1D      |                |             |             |              |              |             |
| HMOX1         | KIAA1239    |                |             |             |              |              |             |
| HSPB8         | KLF4        |                |             |             |              |              |             |
| HSPC159       | KLK13       |                |             |             |              |              |             |
| IL1F10        | KRT23       |                |             |             |              |              |             |

| <b>ZNF750</b> | <b>KLF4</b> | <b>CEBPa/b</b> | <b>IRF6</b> | <b>ETS1</b> | <b>NOTCH</b> | <b>GRHL3</b> | <b>EFNA</b> |
|---------------|-------------|----------------|-------------|-------------|--------------|--------------|-------------|
| IL1F5         | KRT78       |                |             |             |              |              |             |
| IL1F9         | LCE3D       |                |             |             |              |              |             |
| IL1R2         | LOC283404   |                |             |             |              |              |             |
| JHDM1D        | LOC284023   |                |             |             |              |              |             |
| KIAA1239      | LOC645638   |                |             |             |              |              |             |
| KLF4          | LY6G6C      |                |             |             |              |              |             |
| KLK13         | LYPD5       |                |             |             |              |              |             |
| KRT23         | MARCH3      |                |             |             |              |              |             |
| KRT78         | MPZL3       |                |             |             |              |              |             |
| LOC283404     | MXD1        |                |             |             |              |              |             |
| LOC284023     | NFATC2      |                |             |             |              |              |             |
| LOC645638     | PDZD2       |                |             |             |              |              |             |
| LY6G6C        | PI3         |                |             |             |              |              |             |
| LYPD5         | PIM1        |                |             |             |              |              |             |
| MPZL3         | PLCXD1      |                |             |             |              |              |             |
| MXD1          | POF1B       |                |             |             |              |              |             |
| NFATC2        | PPARD       |                |             |             |              |              |             |
| OVOL1         | PRDM1       |                |             |             |              |              |             |
| PCSK6         | PRSS27      |                |             |             |              |              |             |
| PDZD2         | PSG7        |                |             |             |              |              |             |
| PI3           | PTGS2       |                |             |             |              |              |             |
| PIM1          | RAB11FIP1   |                |             |             |              |              |             |
| PLCXD1        | RCAN1       |                |             |             |              |              |             |
| POF1B         | RNASE7      |                |             |             |              |              |             |
| PPARD         | RNF39       |                |             |             |              |              |             |
| PRDM1         | RORA        |                |             |             |              |              |             |
| PSG7          | SBSN        |                |             |             |              |              |             |
| PTGS2         | SCNN1B      |                |             |             |              |              |             |
| RAB11FIP1     | SLC15A1     |                |             |             |              |              |             |
| RGS2          | SLC5A1      |                |             |             |              |              |             |
| RNASE7        | SLCO4A1     |                |             |             |              |              |             |
| RNF39         | SPRR2G      |                |             |             |              |              |             |
| RORA          | SPRR3       |                |             |             |              |              |             |
| SBSN          | SULT2B1     |                |             |             |              |              |             |
| SCNN1B        | TGM1        |                |             |             |              |              |             |
| SLC5A1        | UGCG        |                |             |             |              |              |             |
| SLCO4A1       | USP2        |                |             |             |              |              |             |
| SPRR2G        | WFDC12      |                |             |             |              |              |             |
| SPRR4         | WFDC5       |                |             |             |              |              |             |
| SULT2B1       |             |                |             |             |              |              |             |
| TGM1          |             |                |             |             |              |              |             |
| TTC39A        |             |                |             |             |              |              |             |

|               |             |                |             |             |              |              |             |
|---------------|-------------|----------------|-------------|-------------|--------------|--------------|-------------|
| <i>ZNF750</i> | <i>KLF4</i> | <i>CEBPa/b</i> | <i>IRF6</i> | <i>ETS1</i> | <i>NOTCH</i> | <i>GRHL3</i> | <i>EFNA</i> |
| <i>UGCG</i>   |             |                |             |             |              |              |             |
| <i>USP2</i>   |             |                |             |             |              |              |             |
| <i>WFDC12</i> |             |                |             |             |              |              |             |
| <i>WFDC5</i>  |             |                |             |             |              |              |             |
| <i>ZNF750</i> |             |                |             |             |              |              |             |

**Table S9. Chromosomal Location of Unique TP63 ChIP-Seq Peaks Identified in Progenitor and Differentiating Human Keratinocytes**

| <b>Chr</b> | <b>Start</b> | <b>End</b> | <b>Length</b> | <b>Summit</b> | <b>Tags</b> |
|------------|--------------|------------|---------------|---------------|-------------|
| chr1       | 928644       | 929063     | 420           | 928913        | 39          |
| chr1       | 950421       | 951567     | 1147          | 951166        | 164         |
| chr1       | 1069032      | 1069556    | 525           | 1069384       | 25          |
| chr1       | 1087868      | 1088850    | 983           | 1088501       | 168         |
| chr1       | 1127236      | 1128662    | 1427          | 1128288       | 66          |
| chr1       | 1142871      | 1143704    | 834           | 1143312       | 81          |
| chr1       | 1176011      | 1176649    | 639           | 1176287       | 221         |
| chr1       | 1183999      | 1184773    | 775           | 1184266       | 78          |
| chr1       | 1228422      | 1228812    | 391           | 1228686       | 36          |
| chr1       | 1346345      | 1347126    | 782           | 1346731       | 172         |
| chr1       | 1360460      | 1361189    | 730           | 1360771       | 77          |
| chr1       | 1552266      | 1553051    | 786           | 1552654       | 99          |
| chr1       | 1555175      | 1555736    | 562           | 1555414       | 37          |
| chr1       | 1812035      | 1812588    | 554           | 1812372       | 31          |
| chr1       | 1828301      | 1829089    | 789           | 1828937       | 132         |
| chr1       | 1864215      | 1865071    | 857           | 1864618       | 100         |
| chr1       | 1879230      | 1879794    | 565           | 1879549       | 46          |
| chr1       | 1890166      | 1891118    | 953           | 1890496       | 257         |
| chr1       | 2110810      | 2111188    | 379           | 2110971       | 31          |
| chr1       | 2128911      | 2129627    | 717           | 2129308       | 168         |
| chr1       | 2131068      | 2131845    | 778           | 2131446       | 107         |
| chr1       | 2243443      | 2243854    | 412           | 2243626       | 69          |
| chr1       | 2255687      | 2256135    | 449           | 2255865       | 63          |
| chr1       | 2265259      | 2265926    | 668           | 2265584       | 106         |
| chr1       | 2269677      | 2270342    | 666           | 2270066       | 70          |
| chr1       | 2348585      | 2349260    | 676           | 2348970       | 78          |
| chr1       | 2349450      | 2350422    | 973           | 2349950       | 271         |
| chr1       | 2352219      | 2352906    | 688           | 2352724       | 142         |
| chr1       | 2691219      | 2691548    | 330           | 2691409       | 35          |
| chr1       | 3311422      | 3311958    | 537           | 3311784       | 38          |
| chr1       | 3371585      | 3372246    | 662           | 3371990       | 76          |
| chr1       | 3379295      | 3380409    | 1115          | 3379881       | 133         |
| chr1       | 3398052      | 3398792    | 741           | 3398389       | 76          |
| chr1       | 3437347      | 3438493    | 1147          | 3438180       | 64          |
| chr1       | 3459728      | 3460368    | 641           | 3460087       | 45          |
| chr1       | 3587494      | 3588114    | 621           | 3587650       | 92          |
| chr1       | 3591709      | 3592318    | 610           | 3591923       | 100         |
| chr1       | 3596428      | 3597370    | 943           | 3597026       | 195         |
| chr1       | 3605090      | 3606059    | 970           | 3605662       | 218         |
| chr1       | 3608864      | 3609339    | 476           | 3609167       | 62          |
| chr1       | 3623319      | 3624286    | 968           | 3623833       | 399         |
| chr1       | 3763184      | 3764454    | 1271          | 3763911       | 233         |
| chr1       | 4714710      | 4715095    | 386           | 4714843       | 27          |
| chr1       | 4797717      | 4798041    | 325           | 4797876       | 52          |
| chr1       | 5634849      | 5635472    | 624           | 5635014       | 71          |
| chr1       | 6241175      | 6241785    | 611           | 6241466       | 73          |
| chr1       | 6332864      | 6333463    | 600           | 6333253       | 143         |
| chr1       | 6397020      | 6397509    | 490           | 6397355       | 92          |

| <b>Chr</b> | <b>Start</b> | <b>End</b> | <b>Length</b> | <b>Summit</b> | <b>Tags</b> |
|------------|--------------|------------|---------------|---------------|-------------|
| chr1       | 6471093      | 6472215    | 1123          | 6471881       | 256         |
| chr1       | 6570027      | 6570711    | 685           | 6570294       | 55          |
| chr1       | 6583969      | 6585142    | 1174          | 6584755       | 122         |
| chr1       | 7552973      | 7553419    | 447           | 7553098       | 26          |
| chr1       | 7987368      | 7987731    | 364           | 7987574       | 125         |
| chr1       | 8334393      | 8335049    | 657           | 8334716       | 118         |
| chr1       | 9164602      | 9165184    | 583           | 9164806       | 263         |
| chr1       | 9576258      | 9577016    | 759           | 9576647       | 197         |
| chr1       | 9873733      | 9874084    | 352           | 9873931       | 75          |
| chr1       | 9880318      | 9880802    | 485           | 9880637       | 41          |
| chr1       | 10618464     | 10619184   | 721           | 10618839      | 133         |
| chr1       | 10653665     | 10654131   | 467           | 10653964      | 54          |
| chr1       | 10801247     | 10801614   | 368           | 10801430      | 80          |
| chr1       | 10807476     | 10807848   | 373           | 10807718      | 26          |
| chr1       | 10882375     | 10882759   | 385           | 10882568      | 82          |
| chr1       | 12214948     | 12215212   | 265           | 12215072      | 19          |
| chr1       | 12600644     | 12601368   | 725           | 12601078      | 348         |
| chr1       | 12601584     | 12602036   | 453           | 12601843      | 23          |
| chr1       | 13782899     | 13783540   | 642           | 13783248      | 107         |
| chr1       | 14826177     | 14826700   | 524           | 14826516      | 37          |
| chr1       | 15110423     | 15111064   | 642           | 15110758      | 26          |
| chr1       | 15112639     | 15113176   | 538           | 15112931      | 157         |
| chr1       | 15245614     | 15245897   | 284           | 15245767      | 44          |
| chr1       | 15563766     | 15564098   | 333           | 15563938      | 36          |
| chr1       | 15599757     | 15600027   | 271           | 15599881      | 24          |
| chr1       | 15964902     | 15965439   | 538           | 15965092      | 78          |
| chr1       | 15998143     | 15998550   | 408           | 15998345      | 180         |
| chr1       | 16032328     | 16032761   | 434           | 16032560      | 69          |
| chr1       | 16151801     | 16152086   | 286           | 16151932      | 34          |
| chr1       | 16351251     | 16351898   | 648           | 16351610      | 29          |
| chr1       | 16354839     | 16355475   | 637           | 16355185      | 95          |
| chr1       | 16372658     | 16373150   | 493           | 16372881      | 86          |
| chr1       | 16383488     | 16384169   | 682           | 16383873      | 112         |
| chr1       | 16387297     | 16387657   | 361           | 16387474      | 27          |
| chr1       | 16566097     | 16566547   | 451           | 16566272      | 72          |
| chr1       | 16595667     | 16596027   | 361           | 16595848      | 106         |
| chr1       | 16855554     | 16856657   | 1104          | 16856489      | 176         |
| chr1       | 17124604     | 17125069   | 466           | 17124836      | 199         |
| chr1       | 17128543     | 17129196   | 654           | 17128741      | 225         |
| chr1       | 17414518     | 17415091   | 574           | 17414690      | 139         |
| chr1       | 17638699     | 17639196   | 498           | 17639030      | 43          |
| chr1       | 17659427     | 17659895   | 469           | 17659634      | 56          |
| chr1       | 17781171     | 17781511   | 341           | 17781298      | 33          |
| chr1       | 19122010     | 19122425   | 416           | 19122180      | 92          |
| chr1       | 19232714     | 19233412   | 699           | 19233125      | 106         |
| chr1       | 19272381     | 19272909   | 529           | 19272571      | 84          |
| chr1       | 19938778     | 19939130   | 353           | 19938890      | 23          |
| chr1       | 21638843     | 21639481   | 639           | 21639100      | 89          |
| chr1       | 21982577     | 21982958   | 382           | 21982752      | 50          |
| chr1       | 22132436     | 22133034   | 599           | 22132673      | 36          |
| chr1       | 22155857     | 22156489   | 633           | 22156199      | 83          |
| chr1       | 22341102     | 22341705   | 604           | 22341444      | 171         |
| chr1       | 22371175     | 22371650   | 476           | 22371473      | 23          |

| Chr  | Start    | End      | Length | Summit   | Tags |
|------|----------|----------|--------|----------|------|
| chr1 | 23030942 | 23031449 | 508    | 23031267 | 51   |
| chr1 | 24310198 | 24310650 | 453    | 24310494 | 33   |
| chr1 | 24319517 | 24320004 | 488    | 24319646 | 26   |
| chr1 | 24394980 | 24395379 | 400    | 24395146 | 215  |
| chr1 | 24484217 | 24484663 | 447    | 24484476 | 146  |
| chr1 | 24485640 | 24485957 | 318    | 24485811 | 55   |
| chr1 | 24516146 | 24516463 | 318    | 24516320 | 86   |
| chr1 | 25393506 | 25393917 | 412    | 25393768 | 62   |
| chr1 | 25466657 | 25467148 | 492    | 25466987 | 47   |
| chr1 | 25536951 | 25537708 | 758    | 25537329 | 52   |
| chr1 | 25759656 | 25760118 | 463    | 25760001 | 31   |
| chr1 | 26337246 | 26337698 | 453    | 26337581 | 16   |
| chr1 | 26477254 | 26477706 | 453    | 26477547 | 31   |
| chr1 | 26527127 | 26527441 | 315    | 26527290 | 67   |
| chr1 | 26819899 | 26820313 | 415    | 26820035 | 51   |
| chr1 | 26894337 | 26895072 | 736    | 26894701 | 49   |
| chr1 | 27054054 | 27054446 | 393    | 27054218 | 133  |
| chr1 | 27057940 | 27058431 | 492    | 27058202 | 108  |
| chr1 | 27061060 | 27061455 | 396    | 27061220 | 25   |
| chr1 | 27063830 | 27064707 | 878    | 27064174 | 389  |
| chr1 | 27541808 | 27542601 | 794    | 27542167 | 288  |
| chr1 | 27721460 | 27722110 | 651    | 27721655 | 138  |
| chr1 | 27726760 | 27727645 | 886    | 27727325 | 91   |
| chr1 | 27802980 | 27803485 | 506    | 27803301 | 65   |
| chr1 | 27924746 | 27925352 | 607    | 27925055 | 49   |
| chr1 | 27925363 | 27925744 | 382    | 27925515 | 24   |
| chr1 | 27972172 | 27972630 | 459    | 27972332 | 40   |
| chr1 | 28459099 | 28459765 | 667    | 28459402 | 56   |
| chr1 | 28780569 | 28781153 | 585    | 28780910 | 81   |
| chr1 | 29084053 | 29084437 | 385    | 29084200 | 97   |
| chr1 | 29390272 | 29390871 | 600    | 29390537 | 27   |
| chr1 | 29821912 | 29822269 | 358    | 29822141 | 60   |
| chr1 | 30993409 | 30993924 | 516    | 30993759 | 46   |
| chr1 | 31908050 | 31908589 | 540    | 31908294 | 63   |
| chr1 | 31939601 | 31939833 | 233    | 31939717 | 25   |
| chr1 | 31991760 | 31992105 | 346    | 31991931 | 61   |
| chr1 | 32417871 | 32418722 | 852    | 32418335 | 148  |
| chr1 | 32738771 | 32739214 | 444    | 32739086 | 42   |
| chr1 | 32998362 | 32998913 | 552    | 32998529 | 145  |
| chr1 | 33055228 | 33055755 | 528    | 33055591 | 29   |
| chr1 | 33201759 | 33202814 | 1056   | 33202088 | 229  |
| chr1 | 33459091 | 33459678 | 588    | 33459480 | 122  |
| chr1 | 34993094 | 34993938 | 845    | 34993638 | 254  |
| chr1 | 36168985 | 36169475 | 491    | 36169355 | 19   |
| chr1 | 36388563 | 36389154 | 592    | 36388758 | 117  |
| chr1 | 38184992 | 38185528 | 537    | 38185325 | 32   |
| chr1 | 38265350 | 38265886 | 537    | 38265547 | 239  |
| chr1 | 38355562 | 38356272 | 711    | 38356072 | 312  |
| chr1 | 40208636 | 40208983 | 348    | 40208797 | 110  |
| chr1 | 40553387 | 40554041 | 655    | 40553658 | 104  |
| chr1 | 41124946 | 41125242 | 297    | 41125086 | 64   |
| chr1 | 41245136 | 41245936 | 801    | 41245779 | 64   |
| chr1 | 41720374 | 41720939 | 566    | 41720702 | 57   |

| Chr  | Start     | End       | Length | Summit    | Tags |
|------|-----------|-----------|--------|-----------|------|
| chr1 | 41734355  | 41734897  | 543    | 41734687  | 54   |
| chr1 | 42973509  | 42974223  | 715    | 42973892  | 67   |
| chr1 | 43179309  | 43179667  | 359    | 43179501  | 97   |
| chr1 | 43245602  | 43246165  | 564    | 43245872  | 46   |
| chr1 | 43259765  | 43260357  | 593    | 43259996  | 45   |
| chr1 | 43286975  | 43287329  | 355    | 43287105  | 52   |
| chr1 | 43788290  | 43788863  | 574    | 43788683  | 183  |
| chr1 | 43802346  | 43803063  | 718    | 43802722  | 111  |
| chr1 | 43820284  | 43821003  | 720    | 43820654  | 90   |
| chr1 | 43824451  | 43824789  | 339    | 43824615  | 124  |
| chr1 | 44123373  | 44123921  | 549    | 44123719  | 125  |
| chr1 | 44152854  | 44153250  | 397    | 44153028  | 103  |
| chr1 | 45037997  | 45038777  | 781    | 45038192  | 141  |
| chr1 | 46762186  | 46762542  | 357    | 46762350  | 59   |
| chr1 | 47572146  | 47572798  | 653    | 47572537  | 106  |
| chr1 | 48257072  | 48257380  | 309    | 48257201  | 44   |
| chr1 | 53458721  | 53459308  | 588    | 53458962  | 22   |
| chr1 | 53721049  | 53721410  | 362    | 53721247  | 60   |
| chr1 | 54076358  | 54076902  | 545    | 54076701  | 36   |
| chr1 | 54127774  | 54128346  | 573    | 54128166  | 116  |
| chr1 | 54184221  | 54184969  | 749    | 54184586  | 27   |
| chr1 | 54291375  | 54292038  | 664    | 54291722  | 53   |
| chr1 | 54405901  | 54406415  | 515    | 54406242  | 162  |
| chr1 | 54561581  | 54561961  | 381    | 54561792  | 89   |
| chr1 | 54780247  | 54781304  | 1058   | 54780852  | 268  |
| chr1 | 55277772  | 55278122  | 351    | 55277903  | 22   |
| chr1 | 58811018  | 58811309  | 292    | 58811137  | 38   |
| chr1 | 59834864  | 59835159  | 296    | 59835028  | 36   |
| chr1 | 59911918  | 59912473  | 556    | 59912307  | 93   |
| chr1 | 63555625  | 63556227  | 603    | 63555822  | 110  |
| chr1 | 64501516  | 64501807  | 292    | 64501683  | 17   |
| chr1 | 65386636  | 65387256  | 621    | 65386948  | 33   |
| chr1 | 66719322  | 66719950  | 629    | 66719648  | 29   |
| chr1 | 67924254  | 67925224  | 971    | 67925089  | 51   |
| chr1 | 75614246  | 75614852  | 607    | 75614554  | 25   |
| chr1 | 84812586  | 84813003  | 418    | 84812736  | 39   |
| chr1 | 85135895  | 85136386  | 492    | 85136075  | 54   |
| chr1 | 85514781  | 85515255  | 475    | 85515136  | 36   |
| chr1 | 88273889  | 88274210  | 322    | 88274051  | 36   |
| chr1 | 88299444  | 88299721  | 278    | 88299591  | 30   |
| chr1 | 89847299  | 89847588  | 290    | 89847429  | 21   |
| chr1 | 93023007  | 93023689  | 683    | 93023309  | 65   |
| chr1 | 93199520  | 93200240  | 721    | 93200069  | 38   |
| chr1 | 93831167  | 93831629  | 463    | 93831288  | 21   |
| chr1 | 93835935  | 93836268  | 334    | 93836130  | 37   |
| chr1 | 94485681  | 94486211  | 531    | 94485992  | 16   |
| chr1 | 95471951  | 95472560  | 610    | 95472237  | 40   |
| chr1 | 97837842  | 97838236  | 395    | 97838108  | 19   |
| chr1 | 109172567 | 109172902 | 336    | 109172737 | 79   |
| chr1 | 109584666 | 109585170 | 505    | 109585000 | 185  |
| chr1 | 109607338 | 109607770 | 433    | 109607547 | 216  |
| chr1 | 109640793 | 109641399 | 607    | 109641125 | 65   |
| chr1 | 110268496 | 110268829 | 334    | 110268646 | 31   |

| Chr  | Start     | End       | Length | Summit    | Tags |
|------|-----------|-----------|--------|-----------|------|
| chr1 | 110273093 | 110273800 | 708    | 110273448 | 45   |
| chr1 | 111937141 | 111937421 | 281    | 111937268 | 23   |
| chr1 | 112082398 | 112083060 | 663    | 112082749 | 84   |
| chr1 | 112861234 | 112861715 | 482    | 112861473 | 41   |
| chr1 | 113031567 | 113032066 | 500    | 113031698 | 33   |
| chr1 | 115999388 | 115999776 | 389    | 115999596 | 77   |
| chr1 | 116183113 | 116183903 | 791    | 116183560 | 139  |
| chr1 | 116221703 | 116222193 | 491    | 116221831 | 39   |
| chr1 | 116753881 | 116754199 | 319    | 116754032 | 21   |
| chr1 | 117223301 | 117223621 | 321    | 117223445 | 46   |
| chr1 | 117554970 | 117555326 | 357    | 117555199 | 19   |
| chr1 | 118553885 | 118554423 | 539    | 118554041 | 71   |
| chr1 | 119702881 | 119703179 | 299    | 119702998 | 26   |
| chr1 | 120861689 | 120861964 | 276    | 120861819 | 35   |
| chr1 | 143750873 | 143751547 | 675    | 143751305 | 109  |
| chr1 | 144287012 | 144287479 | 468    | 144287276 | 76   |
| chr1 | 145537846 | 145538407 | 562    | 145538114 | 28   |
| chr1 | 148030927 | 148031564 | 638    | 148031242 | 16   |
| chr1 | 148754677 | 148755336 | 660    | 148755026 | 72   |
| chr1 | 149297778 | 149298161 | 384    | 149297949 | 159  |
| chr1 | 149952788 | 149953309 | 522    | 149953129 | 105  |
| chr1 | 150742000 | 150742337 | 338    | 150742124 | 31   |
| chr1 | 151025011 | 151025481 | 471    | 151025279 | 154  |
| chr1 | 151045593 | 151045945 | 353    | 151045804 | 27   |
| chr1 | 151050157 | 151050489 | 333    | 151050359 | 23   |
| chr1 | 151180533 | 151180845 | 313    | 151180678 | 44   |
| chr1 | 151192858 | 151193253 | 396    | 151193059 | 87   |
| chr1 | 151527586 | 151528014 | 429    | 151527862 | 49   |
| chr1 | 151806596 | 151806934 | 339    | 151806760 | 91   |
| chr1 | 151854532 | 151855070 | 539    | 151854713 | 170  |
| chr1 | 152013929 | 152014349 | 421    | 152014055 | 23   |
| chr1 | 152657313 | 152658025 | 713    | 152657667 | 40   |
| chr1 | 152797096 | 152797833 | 738    | 152797458 | 44   |
| chr1 | 153149811 | 153150288 | 478    | 153150145 | 45   |
| chr1 | 153176069 | 153176511 | 443    | 153176380 | 20   |
| chr1 | 153364486 | 153364885 | 400    | 153364669 | 167  |
| chr1 | 153424873 | 153425372 | 500    | 153425217 | 25   |
| chr1 | 153545006 | 153545356 | 351    | 153545160 | 38   |
| chr1 | 153799034 | 153799751 | 718    | 153799432 | 69   |
| chr1 | 154360164 | 154360614 | 451    | 154360293 | 43   |
| chr1 | 154495066 | 154495832 | 767    | 154495437 | 104  |
| chr1 | 154711870 | 154712282 | 413    | 154712081 | 70   |
| chr1 | 154964655 | 154965111 | 457    | 154964923 | 34   |
| chr1 | 154988108 | 154988584 | 477    | 154988262 | 61   |
| chr1 | 158146784 | 158147091 | 308    | 158146934 | 71   |
| chr1 | 158162090 | 158162482 | 393    | 158162369 | 27   |
| chr1 | 159311043 | 159311671 | 629    | 159311251 | 241  |
| chr1 | 159325649 | 159326214 | 566    | 159325980 | 30   |
| chr1 | 159760495 | 159760898 | 404    | 159760771 | 32   |
| chr1 | 160781376 | 160781981 | 606    | 160781623 | 44   |
| chr1 | 164136867 | 164137257 | 391    | 164137024 | 49   |
| chr1 | 166026108 | 166026419 | 312    | 166026289 | 23   |
| chr1 | 167351727 | 167352108 | 382    | 167351918 | 128  |



| Chr  | Start     | End       | Length | Summit    | Tags |
|------|-----------|-----------|--------|-----------|------|
| chr1 | 168818998 | 168819311 | 314    | 168819151 | 62   |
| chr1 | 170374493 | 170374743 | 251    | 170374618 | 14   |
| chr1 | 172474318 | 172474754 | 437    | 172474602 | 17   |
| chr1 | 175065066 | 175065402 | 337    | 175065192 | 21   |
| chr1 | 175540848 | 175541228 | 381    | 175540994 | 66   |
| chr1 | 179189019 | 179189631 | 613    | 179189290 | 117  |
| chr1 | 179370508 | 179371114 | 607    | 179370911 | 266  |
| chr1 | 179395224 | 179395612 | 389    | 179395411 | 109  |
| chr1 | 180323623 | 180324157 | 535    | 180323966 | 41   |
| chr1 | 180337118 | 180337428 | 311    | 180337274 | 45   |
| chr1 | 180879409 | 180879925 | 517    | 180879703 | 90   |
| chr1 | 181519059 | 181519409 | 351    | 181519270 | 61   |
| chr1 | 196138155 | 196138908 | 754    | 196138629 | 48   |
| chr1 | 198905087 | 198906016 | 930    | 198905610 | 349  |
| chr1 | 199130425 | 199131112 | 688    | 199130661 | 44   |
| chr1 | 199148820 | 199149138 | 319    | 199148950 | 55   |
| chr1 | 199495379 | 199496028 | 650    | 199495789 | 160  |
| chr1 | 199519720 | 199520286 | 567    | 199519935 | 60   |
| chr1 | 199547383 | 199547963 | 581    | 199547513 | 46   |
| chr1 | 199632762 | 199633289 | 528    | 199632995 | 158  |
| chr1 | 199704063 | 199705333 | 1271   | 199704916 | 326  |
| chr1 | 199886030 | 199886710 | 681    | 199886349 | 116  |
| chr1 | 200292295 | 200292899 | 605    | 200292531 | 57   |
| chr1 | 200457914 | 200458491 | 578    | 200458220 | 71   |
| chr1 | 200464981 | 200465371 | 391    | 200465214 | 80   |
| chr1 | 200472777 | 200473218 | 442    | 200473066 | 184  |
| chr1 | 200829668 | 200829981 | 314    | 200829851 | 32   |
| chr1 | 201072062 | 201072532 | 471    | 201072409 | 33   |
| chr1 | 201886154 | 201886649 | 496    | 201886373 | 294  |
| chr1 | 202730005 | 202730668 | 664    | 202730515 | 64   |
| chr1 | 202835328 | 202835731 | 404    | 202835555 | 69   |
| chr1 | 203494528 | 203495156 | 629    | 203494784 | 51   |
| chr1 | 203512122 | 203512517 | 396    | 203512380 | 42   |
| chr1 | 203520158 | 203520899 | 742    | 203520549 | 67   |
| chr1 | 203827717 | 203828140 | 424    | 203827994 | 205  |
| chr1 | 203985272 | 203986017 | 746    | 203985726 | 154  |
| chr1 | 204431479 | 204431790 | 312    | 204431663 | 23   |
| chr1 | 206449418 | 206449815 | 398    | 206449564 | 52   |
| chr1 | 206478748 | 206479177 | 430    | 206478940 | 88   |
| chr1 | 207655916 | 207656470 | 555    | 207656287 | 116  |
| chr1 | 208045926 | 208046327 | 402    | 208046066 | 32   |
| chr1 | 208055899 | 208056349 | 451    | 208056129 | 240  |
| chr1 | 208561572 | 208561819 | 248    | 208561696 | 30   |
| chr1 | 208568986 | 208569475 | 490    | 208569315 | 38   |
| chr1 | 209498752 | 209499592 | 841    | 209498921 | 61   |
| chr1 | 210525115 | 210525856 | 742    | 210525496 | 115  |
| chr1 | 210846681 | 210847103 | 423    | 210846816 | 27   |
| chr1 | 210848223 | 210848615 | 393    | 210848399 | 39   |
| chr1 | 212521268 | 212521872 | 605    | 212521652 | 114  |
| chr1 | 221321350 | 221321638 | 289    | 221321500 | 41   |
| chr1 | 221809660 | 221810239 | 580    | 221809863 | 124  |
| chr1 | 221993298 | 221993852 | 555    | 221993653 | 30   |
| chr1 | 222757789 | 222758354 | 566    | 222758171 | 278  |

| Chr   | Start     | End       | Length | Summit    | Tags |
|-------|-----------|-----------|--------|-----------|------|
| chr1  | 223703558 | 223704050 | 493    | 223703874 | 78   |
| chr1  | 223907095 | 223907719 | 625    | 223907404 | 34   |
| chr1  | 224338126 | 224338622 | 497    | 224338481 | 60   |
| chr1  | 224468585 | 224469175 | 591    | 224468964 | 40   |
| chr1  | 224563293 | 224564121 | 829    | 224563626 | 38   |
| chr1  | 224912477 | 224912819 | 343    | 224912652 | 171  |
| chr1  | 226041999 | 226042539 | 541    | 226042357 | 96   |
| chr1  | 226140101 | 226140618 | 518    | 226140276 | 138  |
| chr1  | 226170079 | 226170599 | 521    | 226170248 | 186  |
| chr1  | 226267591 | 226268070 | 480    | 226267814 | 286  |
| chr1  | 226268889 | 226269256 | 368    | 226269100 | 37   |
| chr1  | 226394256 | 226394820 | 565    | 226394440 | 40   |
| chr1  | 226608513 | 226609087 | 575    | 226608890 | 89   |
| chr1  | 226740735 | 226741883 | 1149   | 226741125 | 141  |
| chr1  | 227349468 | 227350160 | 693    | 227349750 | 56   |
| chr1  | 227427838 | 227428165 | 328    | 227428020 | 56   |
| chr1  | 232813024 | 232813727 | 704    | 232813397 | 47   |
| chr1  | 233200589 | 233200875 | 287    | 233200750 | 27   |
| chr1  | 240753592 | 240754388 | 797    | 240754027 | 78   |
| chr1  | 240754521 | 240754982 | 462    | 240754712 | 32   |
| chr1  | 242174334 | 242174744 | 411    | 242174597 | 44   |
| chr1  | 243064649 | 243065691 | 1043   | 243064826 | 69   |
| chr1  | 243320947 | 243321411 | 465    | 243321249 | 106  |
| chr1  | 243478136 | 243478380 | 245    | 243478258 | 17   |
| chr1  | 245917224 | 245917905 | 682    | 245917572 | 25   |
| chr10 | 556346    | 556757    | 412    | 556547    | 71   |
| chr10 | 1095545   | 1096100   | 556    | 1095872   | 34   |
| chr10 | 1223239   | 1223860   | 622    | 1223587   | 86   |
| chr10 | 3139591   | 3140331   | 741    | 3140027   | 270  |
| chr10 | 5608591   | 5609332   | 742    | 5608946   | 59   |
| chr10 | 5700057   | 5700381   | 325    | 5700227   | 85   |
| chr10 | 6300941   | 6301481   | 541    | 6301230   | 116  |
| chr10 | 6573855   | 6574150   | 296    | 6573963   | 16   |
| chr10 | 6645701   | 6646057   | 357    | 6645872   | 40   |
| chr10 | 10993405  | 10993745  | 341    | 10993585  | 42   |
| chr10 | 11099411  | 11100246  | 836    | 11099903  | 41   |
| chr10 | 11966568  | 11967117  | 550    | 11966909  | 28   |
| chr10 | 13772428  | 13772789  | 362    | 13772602  | 27   |
| chr10 | 13840449  | 13840778  | 330    | 13840574  | 29   |
| chr10 | 17699202  | 17699688  | 487    | 17699516  | 75   |
| chr10 | 18956456  | 18957093  | 638    | 18956798  | 63   |
| chr10 | 21624741  | 21624989  | 249    | 21624865  | 18   |
| chr10 | 21665380  | 21665958  | 579    | 21665633  | 104  |
| chr10 | 23767619  | 23768717  | 1099   | 23768370  | 39   |
| chr10 | 24584992  | 24585271  | 280    | 24585123  | 53   |
| chr10 | 24712025  | 24712740  | 716    | 24712356  | 96   |
| chr10 | 25137035  | 25137267  | 233    | 25137151  | 17   |
| chr10 | 29006886  | 29007288  | 403    | 29007029  | 31   |
| chr10 | 30168794  | 30169156  | 363    | 30168960  | 59   |
| chr10 | 30250026  | 30250346  | 321    | 30250209  | 31   |
| chr10 | 30280660  | 30281009  | 350    | 30280814  | 78   |
| chr10 | 31932177  | 31932607  | 431    | 31932415  | 26   |
| chr10 | 32257162  | 32257972  | 811    | 32257786  | 117  |

| Chr   | Start    | End      | Length | Summit   | Tags |
|-------|----------|----------|--------|----------|------|
| chr10 | 33286525 | 33287557 | 1033   | 33287283 | 74   |
| chr10 | 34226250 | 34226527 | 278    | 34226381 | 14   |
| chr10 | 35234906 | 35235276 | 371    | 35235117 | 69   |
| chr10 | 36151265 | 36151577 | 313    | 36151386 | 29   |
| chr10 | 36216646 | 36216936 | 291    | 36216806 | 65   |
| chr10 | 38305384 | 38305956 | 573    | 38305713 | 71   |
| chr10 | 42251080 | 42251599 | 520    | 42251274 | 17   |
| chr10 | 42652363 | 42652841 | 479    | 42652656 | 34   |
| chr10 | 42841480 | 42842146 | 667    | 42841733 | 68   |
| chr10 | 42946247 | 42946640 | 394    | 42946475 | 98   |
| chr10 | 43389654 | 43390282 | 629    | 43390089 | 193  |
| chr10 | 45329780 | 45330125 | 346    | 45329956 | 50   |
| chr10 | 46528709 | 46529215 | 507    | 46529058 | 90   |
| chr10 | 46591434 | 46592012 | 579    | 46591819 | 81   |
| chr10 | 46593942 | 46594265 | 324    | 46594108 | 60   |
| chr10 | 46815823 | 46816261 | 439    | 46815995 | 23   |
| chr10 | 47111221 | 47111536 | 316    | 47111352 | 42   |
| chr10 | 47216725 | 47217147 | 423    | 47216882 | 81   |
| chr10 | 47219001 | 47219545 | 545    | 47219202 | 54   |
| chr10 | 47875071 | 47875417 | 347    | 47875200 | 78   |
| chr10 | 47877318 | 47877900 | 583    | 47877533 | 57   |
| chr10 | 47952718 | 47953316 | 599    | 47952917 | 180  |
| chr10 | 48867100 | 48867800 | 701    | 48867665 | 78   |
| chr10 | 48869698 | 48870106 | 409    | 48869933 | 82   |
| chr10 | 49344402 | 49344991 | 590    | 49344784 | 181  |
| chr10 | 50275808 | 50276405 | 598    | 50276141 | 83   |
| chr10 | 50524325 | 50524929 | 605    | 50524712 | 47   |
| chr10 | 51170015 | 51170433 | 419    | 51170267 | 81   |
| chr10 | 52051684 | 52052087 | 404    | 52051840 | 85   |
| chr10 | 54294303 | 54294634 | 332    | 54294435 | 89   |
| chr10 | 57747414 | 57747780 | 367    | 57747574 | 34   |
| chr10 | 59248412 | 59248749 | 338    | 59248568 | 61   |
| chr10 | 59814840 | 59815537 | 698    | 59815198 | 74   |
| chr10 | 63766275 | 63766553 | 279    | 63766384 | 19   |
| chr10 | 70150898 | 70151626 | 729    | 70151218 | 41   |
| chr10 | 70770543 | 70770878 | 336    | 70770758 | 26   |
| chr10 | 70815147 | 70815464 | 318    | 70815327 | 45   |
| chr10 | 71576513 | 71576948 | 436    | 71576745 | 39   |
| chr10 | 71834194 | 71834663 | 470    | 71834480 | 42   |
| chr10 | 72647082 | 72647530 | 449    | 72647339 | 36   |
| chr10 | 72676381 | 72676923 | 543    | 72676755 | 106  |
| chr10 | 72730540 | 72731270 | 731    | 72730885 | 124  |
| chr10 | 72762942 | 72763277 | 336    | 72763154 | 26   |
| chr10 | 73318535 | 73319095 | 561    | 73318943 | 119  |
| chr10 | 73400909 | 73401428 | 520    | 73401240 | 39   |
| chr10 | 73438251 | 73438625 | 375    | 73438467 | 123  |
| chr10 | 73727707 | 73728421 | 715    | 73728058 | 45   |
| chr10 | 73749289 | 73750057 | 769    | 73749849 | 80   |
| chr10 | 73751857 | 73752280 | 424    | 73752003 | 38   |
| chr10 | 73752295 | 73752814 | 520    | 73752453 | 53   |
| chr10 | 73761447 | 73762152 | 706    | 73761845 | 267  |
| chr10 | 75211436 | 75212043 | 608    | 75211642 | 40   |
| chr10 | 75317514 | 75317913 | 400    | 75317679 | 118  |

| <b>Chr</b> | <b>Start</b> | <b>End</b> | <b>Length</b> | <b>Summit</b> | <b>Tags</b> |
|------------|--------------|------------|---------------|---------------|-------------|
| chr10      | 75318671     | 75319063   | 393           | 75318917      | 65          |
| chr10      | 76724574     | 76725238   | 665           | 76724837      | 87          |
| chr10      | 76831018     | 76831768   | 751           | 76831518      | 80          |
| chr10      | 78845062     | 78845360   | 299           | 78845239      | 27          |
| chr10      | 79328068     | 79328728   | 661           | 79328474      | 394         |
| chr10      | 79518321     | 79518796   | 476           | 79518654      | 28          |
| chr10      | 79611371     | 79611839   | 469           | 79611636      | 58          |
| chr10      | 80349644     | 80350212   | 569           | 80349977      | 274         |
| chr10      | 80380702     | 80381201   | 500           | 80380891      | 158         |
| chr10      | 80393221     | 80393827   | 607           | 80393441      | 74          |
| chr10      | 80448359     | 80448855   | 497           | 80448539      | 101         |
| chr10      | 80625120     | 80625559   | 440           | 80625298      | 42          |
| chr10      | 80650886     | 80651416   | 531           | 80651017      | 80          |
| chr10      | 81130403     | 81130771   | 369           | 81130624      | 22          |
| chr10      | 81731215     | 81731700   | 486           | 81731553      | 23          |
| chr10      | 81914903     | 81915262   | 360           | 81915104      | 80          |
| chr10      | 82179402     | 82179729   | 328           | 82179589      | 39          |
| chr10      | 82368585     | 82369143   | 559           | 82368964      | 87          |
| chr10      | 85733356     | 85733731   | 376           | 85733524      | 58          |
| chr10      | 85928937     | 85929271   | 335           | 85929096      | 46          |
| chr10      | 86078421     | 86078835   | 415           | 86078632      | 26          |
| chr10      | 87728359     | 87728668   | 310           | 87728531      | 50          |
| chr10      | 87793008     | 87793405   | 398           | 87793215      | 154         |
| chr10      | 88708527     | 88709167   | 641           | 88708803      | 197         |
| chr10      | 88718082     | 88718680   | 599           | 88718301      | 204         |
| chr10      | 88844772     | 88845538   | 767           | 88844947      | 74          |
| chr10      | 88972467     | 88972964   | 498           | 88972780      | 40          |
| chr10      | 89104679     | 89105155   | 477           | 89105015      | 51          |
| chr10      | 89881424     | 89881792   | 369           | 89881609      | 85          |
| chr10      | 90740513     | 90741283   | 771           | 90741067      | 164         |
| chr10      | 91394075     | 91395198   | 1124          | 91395002      | 338         |
| chr10      | 92621583     | 92622122   | 540           | 92621743      | 41          |
| chr10      | 93547920     | 93548467   | 548           | 93548073      | 65          |
| chr10      | 94341252     | 94341634   | 383           | 94341447      | 33          |
| chr10      | 94887868     | 94888204   | 337           | 94888078      | 37          |
| chr10      | 95195277     | 95195756   | 480           | 95195448      | 91          |
| chr10      | 95246145     | 95246637   | 493           | 95246299      | 41          |
| chr10      | 96112571     | 96112970   | 400           | 96112772      | 128         |
| chr10      | 97108305     | 97108595   | 291           | 97108446      | 51          |
| chr10      | 97657374     | 97657977   | 604           | 97657650      | 45          |
| chr10      | 98030725     | 98030950   | 226           | 98030838      | 19          |
| chr10      | 99299746     | 99300271   | 526           | 99299895      | 51          |
| chr10      | 99451398     | 99451908   | 511           | 99451624      | 68          |
| chr10      | 99463612     | 99464781   | 1170          | 99464654      | 73          |
| chr10      | 101370766    | 101371542  | 777           | 101371385     | 136         |
| chr10      | 102035701    | 102036244  | 544           | 102035890     | 64          |
| chr10      | 102122902    | 102123417  | 516           | 102123069     | 60          |
| chr10      | 102405980    | 102406663  | 684           | 102406333     | 120         |
| chr10      | 102747974    | 102748506  | 533           | 102748317     | 34          |
| chr10      | 102971174    | 102971853  | 680           | 102971501     | 32          |
| chr10      | 103580554    | 103580952  | 399           | 103580759     | 128         |
| chr10      | 103814787    | 103815335  | 549           | 103814969     | 69          |
| chr10      | 103862870    | 103863244  | 375           | 103863057     | 85          |

| <b>Chr</b> | <b>Start</b> | <b>End</b> | <b>Length</b> | <b>Summit</b> | <b>Tags</b> |
|------------|--------------|------------|---------------|---------------|-------------|
| chr10      | 104391935    | 104392922  | 988           | 104392517     | 217         |
| chr10      | 104864740    | 104865160  | 421           | 104864862     | 42          |
| chr10      | 105507446    | 105507933  | 488           | 105507614     | 84          |
| chr10      | 105621860    | 105622271  | 412           | 105622051     | 190         |
| chr10      | 112103547    | 112103918  | 372           | 112103717     | 67          |
| chr10      | 112148325    | 112148837  | 513           | 112148635     | 44          |
| chr10      | 112669415    | 112669796  | 382           | 112669533     | 14          |
| chr10      | 113223120    | 113223448  | 329           | 113223304     | 52          |
| chr10      | 114741574    | 114742198  | 625           | 114741870     | 30          |
| chr10      | 114849061    | 114849354  | 294           | 114849214     | 75          |
| chr10      | 115301746    | 115302108  | 363           | 115301910     | 136         |
| chr10      | 115994990    | 115995502  | 513           | 115995302     | 40          |
| chr10      | 116070341    | 116070764  | 424           | 116070544     | 128         |
| chr10      | 117606192    | 117606428  | 237           | 117606310     | 15          |
| chr10      | 118022143    | 118022631  | 489           | 118022487     | 30          |
| chr10      | 118883956    | 118884489  | 534           | 118884304     | 42          |
| chr10      | 118966198    | 118966949  | 752           | 118966537     | 138         |
| chr10      | 120504409    | 120504864  | 456           | 120504689     | 44          |
| chr10      | 121074456    | 121075207  | 752           | 121074829     | 70          |
| chr10      | 121180607    | 121180986  | 380           | 121180871     | 25          |
| chr10      | 122695328    | 122695610  | 283           | 122695458     | 28          |
| chr10      | 123329176    | 123329557  | 382           | 123329293     | 39          |
| chr10      | 123346574    | 123347197  | 624           | 123346779     | 216         |
| chr10      | 123834793    | 123835539  | 747           | 123835199     | 69          |
| chr10      | 124123890    | 124124498  | 609           | 124124112     | 60          |
| chr10      | 124225729    | 124226328  | 600           | 124225953     | 128         |
| chr10      | 124495980    | 124496313  | 334           | 124496153     | 39          |
| chr10      | 125842315    | 125843090  | 776           | 125842707     | 81          |
| chr10      | 125974009    | 125974374  | 366           | 125974155     | 75          |
| chr10      | 126017697    | 126018102  | 406           | 126017893     | 96          |
| chr10      | 126019537    | 126019832  | 296           | 126019668     | 109         |
| chr10      | 126203428    | 126203743  | 316           | 126203591     | 83          |
| chr10      | 126297565    | 126298111  | 547           | 126297949     | 133         |
| chr10      | 126333107    | 126333583  | 477           | 126333402     | 76          |
| chr10      | 126766131    | 126766451  | 321           | 126766313     | 62          |
| chr10      | 126975198    | 126975522  | 325           | 126975340     | 27          |
| chr10      | 128583641    | 128584443  | 803           | 128584005     | 78          |
| chr10      | 128588823    | 128589111  | 289           | 128588982     | 41          |
| chr10      | 128603961    | 128604379  | 419           | 128604229     | 15          |
| chr10      | 129426686    | 129427269  | 584           | 129426950     | 131         |
| chr10      | 129627868    | 129628473  | 606           | 129628207     | 220         |
| chr10      | 129735398    | 129735980  | 583           | 129735768     | 51          |
| chr10      | 129742867    | 129743236  | 370           | 129743064     | 55          |
| chr10      | 129751942    | 129752532  | 591           | 129752252     | 219         |
| chr10      | 131190187    | 131190477  | 291           | 131190348     | 32          |
| chr10      | 131638199    | 131638490  | 292           | 131638332     | 27          |
| chr10      | 131708851    | 131709375  | 525           | 131709045     | 38          |
| chr10      | 131712193    | 131712983  | 791           | 131712719     | 71          |
| chr10      | 131878310    | 131879062  | 753           | 131878745     | 71          |
| chr10      | 132782917    | 132783466  | 550           | 132783090     | 101         |
| chr10      | 134087657    | 134088090  | 434           | 134087945     | 61          |
| chr10      | 134111292    | 134111753  | 462           | 134111499     | 168         |
| chr10      | 134366082    | 134366533  | 452           | 134366209     | 31          |

| <b>Chr</b> | <b>Start</b> | <b>End</b> | <b>Length</b> | <b>Summit</b> | <b>Tags</b> |
|------------|--------------|------------|---------------|---------------|-------------|
| chr10      | 134471980    | 134472648  | 669           | 134472267     | 37          |
| chr10      | 134938231    | 134938903  | 673           | 134938485     | 148         |
| chr10      | 135042629    | 135043364  | 736           | 135043085     | 46          |
| chr11      | 382968       | 383617     | 650           | 383374        | 199         |
| chr11      | 436907       | 437267     | 361           | 437069        | 43          |
| chr11      | 496720       | 497732     | 1013          | 497259        | 100         |
| chr11      | 524160       | 525865     | 1706          | 524765        | 430         |
| chr11      | 682703       | 683162     | 460           | 682961        | 137         |
| chr11      | 794004       | 794761     | 758           | 794430        | 354         |
| chr11      | 822550       | 823195     | 646           | 822859        | 67          |
| chr11      | 831460       | 832122     | 663           | 831721        | 48          |
| chr11      | 995923       | 996373     | 451           | 996096        | 61          |
| chr11      | 1040661      | 1041457    | 797           | 1041179       | 269         |
| chr11      | 1284797      | 1285378    | 582           | 1285209       | 151         |
| chr11      | 1554493      | 1555016    | 524           | 1554826       | 26          |
| chr11      | 1808210      | 1808855    | 646           | 1808655       | 349         |
| chr11      | 1811722      | 1812508    | 787           | 1812199       | 153         |
| chr11      | 1820823      | 1821234    | 412           | 1821031       | 55          |
| chr11      | 1851318      | 1851827    | 510           | 1851587       | 31          |
| chr11      | 1902005      | 1902268    | 264           | 1902136       | 21          |
| chr11      | 1905200      | 1905547    | 348           | 1905322       | 22          |
| chr11      | 2050898      | 2051438    | 541           | 2051231       | 28          |
| chr11      | 2156790      | 2157516    | 727           | 2157157       | 83          |
| chr11      | 2180177      | 2180911    | 735           | 2180536       | 59          |
| chr11      | 2234243      | 2234891    | 649           | 2234545       | 112         |
| chr11      | 2378213      | 2378554    | 342           | 2378430       | 23          |
| chr11      | 2781194      | 2781966    | 773           | 2781453       | 166         |
| chr11      | 2969639      | 2970226    | 588           | 2969876       | 34          |
| chr11      | 3593805      | 3594160    | 356           | 3593939       | 23          |
| chr11      | 8170173      | 8170459    | 287           | 8170301       | 25          |
| chr11      | 8208311      | 8208935    | 625           | 8208526       | 56          |
| chr11      | 8810748      | 8811184    | 437           | 8810995       | 64          |
| chr11      | 9736147      | 9736551    | 405           | 9736356       | 41          |
| chr11      | 9736672      | 9737220    | 549           | 9737040       | 63          |
| chr11      | 10272864     | 10273136   | 273           | 10272993      | 22          |
| chr11      | 10285942     | 10286515   | 574           | 10286319      | 52          |
| chr11      | 10467193     | 10467556   | 364           | 10467405      | 47          |
| chr11      | 10877467     | 10877972   | 506           | 10877755      | 255         |
| chr11      | 11498169     | 11498763   | 595           | 11498530      | 87          |
| chr11      | 11536474     | 11536769   | 296           | 11536605      | 21          |
| chr11      | 12044074     | 12044428   | 355           | 12044249      | 131         |
| chr11      | 12167702     | 12168048   | 347           | 12167897      | 216         |
| chr11      | 12652116     | 12652928   | 813           | 12652532      | 73          |
| chr11      | 12652934     | 12653589   | 656           | 12653268      | 26          |
| chr11      | 13646493     | 13647004   | 512           | 13646785      | 19          |
| chr11      | 14359009     | 14359649   | 641           | 14359360      | 37          |
| chr11      | 14694093     | 14694810   | 718           | 14694452      | 26          |
| chr11      | 17776381     | 17776785   | 405           | 17776621      | 141         |
| chr11      | 20034283     | 20034714   | 432           | 20034454      | 24          |
| chr11      | 20365205     | 20365909   | 705           | 20365687      | 53          |
| chr11      | 27341026     | 27341646   | 621           | 27341464      | 103         |
| chr11      | 30301045     | 30301522   | 478           | 30301241      | 55          |
| chr11      | 32561434     | 32562178   | 745           | 32561830      | 158         |

| Chr   | Start    | End      | Length | Summit   | Tags |
|-------|----------|----------|--------|----------|------|
| chr11 | 32870521 | 32871038 | 518    | 32870678 | 33   |
| chr11 | 35093738 | 35094109 | 372    | 35093902 | 110  |
| chr11 | 36376176 | 36376645 | 470    | 36376514 | 40   |
| chr11 | 44542575 | 44543807 | 1233   | 44542901 | 224  |
| chr11 | 45136034 | 45136657 | 624    | 45136372 | 56   |
| chr11 | 45158255 | 45159192 | 938    | 45158761 | 290  |
| chr11 | 46323187 | 46323784 | 598    | 46323364 | 198  |
| chr11 | 46665022 | 46665804 | 783    | 46665354 | 50   |
| chr11 | 46894929 | 46895394 | 466    | 46895070 | 66   |
| chr11 | 47192870 | 47193318 | 449    | 47193091 | 97   |
| chr11 | 47226775 | 47227149 | 375    | 47226940 | 142  |
| chr11 | 47620400 | 47620918 | 519    | 47620728 | 34   |
| chr11 | 56950027 | 56950364 | 338    | 56950197 | 44   |
| chr11 | 57181348 | 57181899 | 552    | 57181464 | 48   |
| chr11 | 58790374 | 58790814 | 441    | 58790663 | 28   |
| chr11 | 60376456 | 60377071 | 616    | 60376837 | 40   |
| chr11 | 60459726 | 60460011 | 286    | 60459888 | 21   |
| chr11 | 60893676 | 60894180 | 505    | 60893876 | 26   |
| chr11 | 60953832 | 60954340 | 509    | 60953963 | 28   |
| chr11 | 61497548 | 61497924 | 377    | 61497677 | 59   |
| chr11 | 62063319 | 62063966 | 648    | 62063533 | 109  |
| chr11 | 62523638 | 62524010 | 373    | 62523853 | 38   |
| chr11 | 63485575 | 63486101 | 527    | 63485910 | 101  |
| chr11 | 63509931 | 63510722 | 792    | 63510349 | 300  |
| chr11 | 63522611 | 63523469 | 859    | 63523172 | 41   |
| chr11 | 63588957 | 63589500 | 544    | 63589332 | 91   |
| chr11 | 63644875 | 63645460 | 586    | 63645243 | 273  |
| chr11 | 63800682 | 63801081 | 400    | 63800858 | 94   |
| chr11 | 63829152 | 63829660 | 509    | 63829489 | 42   |
| chr11 | 63961199 | 63961694 | 496    | 63961549 | 43   |
| chr11 | 64066655 | 64067386 | 732    | 64066974 | 135  |
| chr11 | 64334400 | 64334921 | 522    | 64334611 | 48   |
| chr11 | 64366993 | 64367554 | 562    | 64367204 | 153  |
| chr11 | 64564836 | 64565644 | 809    | 64565331 | 125  |
| chr11 | 64635590 | 64636273 | 684    | 64635952 | 47   |
| chr11 | 64646062 | 64646562 | 501    | 64646326 | 302  |
| chr11 | 64707182 | 64707777 | 596    | 64707334 | 119  |
| chr11 | 64749516 | 64750116 | 601    | 64749913 | 198  |
| chr11 | 64785618 | 64785991 | 374    | 64785814 | 43   |
| chr11 | 64905962 | 64906658 | 697    | 64906366 | 272  |
| chr11 | 64910306 | 64910770 | 465    | 64910559 | 144  |
| chr11 | 64945190 | 64945807 | 618    | 64945377 | 275  |
| chr11 | 65116769 | 65117461 | 693    | 65117058 | 194  |
| chr11 | 65304884 | 65305494 | 611    | 65305122 | 60   |
| chr11 | 65317016 | 65317687 | 672    | 65317381 | 72   |
| chr11 | 65384371 | 65385252 | 882    | 65384842 | 144  |
| chr11 | 65423084 | 65423766 | 683    | 65423287 | 164  |
| chr11 | 65442552 | 65443657 | 1106   | 65442877 | 82   |
| chr11 | 65593845 | 65594718 | 874    | 65594333 | 133  |
| chr11 | 65860399 | 65861318 | 920    | 65861113 | 169  |
| chr11 | 65863063 | 65863474 | 412    | 65863320 | 50   |
| chr11 | 66210427 | 66210900 | 474    | 66210616 | 145  |
| chr11 | 66586639 | 66587009 | 371    | 66586766 | 25   |

| Chr   | Start     | End       | Length | Summit    | Tags |
|-------|-----------|-----------|--------|-----------|------|
| chr11 | 66834485  | 66835148  | 664    | 66834835  | 65   |
| chr11 | 66836801  | 66837184  | 384    | 66836928  | 39   |
| chr11 | 67031959  | 67032696  | 738    | 67032356  | 59   |
| chr11 | 67108520  | 67109269  | 750    | 67108856  | 41   |
| chr11 | 67153348  | 67154221  | 874    | 67153957  | 59   |
| chr11 | 67836706  | 67837507  | 802    | 67837111  | 56   |
| chr11 | 68644968  | 68645444  | 477    | 68645228  | 65   |
| chr11 | 68901563  | 68902158  | 596    | 68901764  | 40   |
| chr11 | 68922916  | 68923819  | 904    | 68923357  | 51   |
| chr11 | 69034474  | 69034908  | 435    | 69034665  | 43   |
| chr11 | 69650238  | 69651262  | 1025   | 69650501  | 309  |
| chr11 | 70127433  | 70127936  | 504    | 70127601  | 80   |
| chr11 | 71185432  | 71185815  | 384    | 71185662  | 156  |
| chr11 | 71491506  | 71492240  | 735    | 71491682  | 59   |
| chr11 | 72110455  | 72110827  | 373    | 72110645  | 190  |
| chr11 | 72169053  | 72169725  | 673    | 72169430  | 110  |
| chr11 | 72220466  | 72220777  | 312    | 72220633  | 82   |
| chr11 | 72574868  | 72575468  | 601    | 72575286  | 70   |
| chr11 | 72616608  | 72617120  | 513    | 72616770  | 44   |
| chr11 | 72777143  | 72777667  | 525    | 72777459  | 105  |
| chr11 | 72986718  | 72987144  | 427    | 72986942  | 22   |
| chr11 | 73523940  | 73524263  | 324    | 73524064  | 18   |
| chr11 | 74337663  | 74338211  | 549    | 74337844  | 48   |
| chr11 | 74952531  | 74953034  | 504    | 74952692  | 67   |
| chr11 | 75112397  | 75112676  | 280    | 75112527  | 38   |
| chr11 | 76171711  | 76172686  | 976    | 76172544  | 45   |
| chr11 | 76172838  | 76173654  | 817    | 76173413  | 169  |
| chr11 | 82674260  | 82674705  | 446    | 82674423  | 72   |
| chr11 | 85457549  | 85458316  | 768    | 85457944  | 180  |
| chr11 | 85633660  | 85634194  | 535    | 85633916  | 37   |
| chr11 | 86741463  | 86741876  | 414    | 86741696  | 112  |
| chr11 | 92079966  | 92080273  | 308    | 92080135  | 35   |
| chr11 | 92225808  | 92226200  | 393    | 92225984  | 188  |
| chr11 | 93501525  | 93502038  | 514    | 93501863  | 36   |
| chr11 | 94507372  | 94507666  | 295    | 94507537  | 90   |
| chr11 | 94809142  | 94809605  | 464    | 94809480  | 32   |
| chr11 | 95616103  | 95616675  | 573    | 95616290  | 234  |
| chr11 | 101485927 | 101486566 | 640    | 101486244 | 35   |
| chr11 | 101644450 | 101644944 | 495    | 101644651 | 83   |
| chr11 | 102467808 | 102468249 | 442    | 102468106 | 35   |
| chr11 | 109071974 | 109072541 | 568    | 109072324 | 36   |
| chr11 | 109672301 | 109673065 | 765    | 109672910 | 107  |
| chr11 | 110802355 | 110802888 | 534    | 110802723 | 72   |
| chr11 | 112760576 | 112760999 | 424    | 112760722 | 18   |
| chr11 | 112822883 | 112823244 | 362    | 112823080 | 127  |
| chr11 | 113251254 | 113251787 | 534    | 113251587 | 32   |
| chr11 | 115046347 | 115046927 | 581    | 115046598 | 40   |
| chr11 | 116069426 | 116069998 | 573    | 116069621 | 69   |
| chr11 | 117200185 | 117200732 | 548    | 117200554 | 102  |
| chr11 | 117528895 | 117529531 | 637    | 117529289 | 187  |
| chr11 | 117541777 | 117542512 | 736    | 117542292 | 53   |
| chr11 | 117998933 | 117999617 | 685    | 117999413 | 259  |
| chr11 | 118286023 | 118286860 | 838    | 118286408 | 225  |



| Chr   | Start     | End       | Length | Summit    | Tags |
|-------|-----------|-----------|--------|-----------|------|
| chr11 | 118752061 | 118752588 | 528    | 118752427 | 74   |
| chr11 | 119041841 | 119042388 | 548    | 119042145 | 58   |
| chr11 | 119067828 | 119068494 | 667    | 119068154 | 307  |
| chr11 | 119072223 | 119073104 | 882    | 119072477 | 173  |
| chr11 | 119237066 | 119237530 | 465    | 119237270 | 87   |
| chr11 | 119498141 | 119498672 | 532    | 119498289 | 30   |
| chr11 | 119504754 | 119505079 | 326    | 119504881 | 68   |
| chr11 | 119511527 | 119512168 | 642    | 119511888 | 38   |
| chr11 | 119544956 | 119545693 | 738    | 119545279 | 106  |
| chr11 | 120123103 | 120123421 | 319    | 120123281 | 49   |
| chr11 | 121031166 | 121031690 | 525    | 121031511 | 54   |
| chr11 | 122031338 | 122031758 | 421    | 122031576 | 91   |
| chr11 | 122992452 | 122992759 | 308    | 122992593 | 109  |
| chr11 | 123117224 | 123117828 | 605    | 123117560 | 29   |
| chr11 | 124048470 | 124049028 | 559    | 124048840 | 30   |
| chr11 | 124174863 | 124175535 | 673    | 124175180 | 27   |
| chr11 | 124458055 | 124458532 | 478    | 124458281 | 96   |
| chr11 | 124870249 | 124870680 | 432    | 124870401 | 100  |
| chr11 | 124944312 | 124944900 | 589    | 124944548 | 57   |
| chr11 | 128315687 | 128316194 | 508    | 128316005 | 86   |
| chr11 | 128811619 | 128811998 | 380    | 128811816 | 64   |
| chr11 | 129270550 | 129270995 | 446    | 129270829 | 47   |
| chr11 | 129572599 | 129573217 | 619    | 129572942 | 96   |
| chr12 | 128516    | 128847    | 332    | 128664    | 37   |
| chr12 | 827202    | 827812    | 611    | 827446    | 36   |
| chr12 | 993618    | 993920    | 303    | 993760    | 28   |
| chr12 | 1983706   | 1984287   | 582    | 1984051   | 190  |
| chr12 | 3056108   | 3056918   | 811    | 3056527   | 52   |
| chr12 | 3279223   | 3279698   | 476    | 3279525   | 166  |
| chr12 | 3437292   | 3437697   | 406    | 3437518   | 42   |
| chr12 | 4010482   | 4011208   | 727    | 4010727   | 146  |
| chr12 | 4918320   | 4918584   | 265    | 4918456   | 21   |
| chr12 | 6190862   | 6191163   | 302    | 6191023   | 31   |
| chr12 | 6195166   | 6195703   | 538    | 6195545   | 55   |
| chr12 | 6363200   | 6363780   | 581    | 6363505   | 31   |
| chr12 | 6477111   | 6477597   | 487    | 6477479   | 32   |
| chr12 | 6519874   | 6520362   | 489    | 6520209   | 35   |
| chr12 | 6732845   | 6733265   | 421    | 6733082   | 36   |
| chr12 | 6958548   | 6958805   | 258    | 6958677   | 30   |
| chr12 | 7016884   | 7017285   | 402    | 7017121   | 61   |
| chr12 | 8055421   | 8055651   | 231    | 8055536   | 17   |
| chr12 | 9491852   | 9492282   | 431    | 9492133   | 28   |
| chr12 | 9916527   | 9917035   | 509    | 9916722   | 177  |
| chr12 | 10760554  | 10760849  | 296    | 10760719  | 17   |
| chr12 | 12760988  | 12761737  | 750    | 12761354  | 39   |
| chr12 | 15833935  | 15834435  | 501    | 15834252  | 88   |
| chr12 | 19476114  | 19476414  | 301    | 19476244  | 25   |
| chr12 | 22145918  | 22146424  | 507    | 22146194  | 30   |
| chr12 | 22669170  | 22669558  | 389    | 22669357  | 215  |
| chr12 | 25179818  | 25180194  | 377    | 25180050  | 37   |
| chr12 | 26170143  | 26170569  | 427    | 26170292  | 37   |
| chr12 | 26270659  | 26271365  | 707    | 26270961  | 91   |
| chr12 | 29827647  | 29827940  | 294    | 29827823  | 13   |

| <b>Chr</b> | <b>Start</b> | <b>End</b> | <b>Length</b> | <b>Summit</b> | <b>Tags</b> |
|------------|--------------|------------|---------------|---------------|-------------|
| chr12      | 31368219     | 31368786   | 568           | 31368423      | 88          |
| chr12      | 37584922     | 37585488   | 567           | 37585097      | 134         |
| chr12      | 42515680     | 42516088   | 409           | 42515855      | 34          |
| chr12      | 46461849     | 46462392   | 544           | 46462230      | 44          |
| chr12      | 46543525     | 46544139   | 615           | 46543740      | 228         |
| chr12      | 46584767     | 46585481   | 715           | 46585139      | 31          |
| chr12      | 46657384     | 46657887   | 504           | 46657600      | 34          |
| chr12      | 46680977     | 46681344   | 368           | 46681167      | 47          |
| chr12      | 47396487     | 47397164   | 678           | 47396837      | 70          |
| chr12      | 47570759     | 47571043   | 285           | 47570915      | 79          |
| chr12      | 47944724     | 47945308   | 585           | 47945026      | 92          |
| chr12      | 48323974     | 48324363   | 390           | 48324166      | 49          |
| chr12      | 48647460     | 48648058   | 599           | 48647687      | 103         |
| chr12      | 48718895     | 48719411   | 517           | 48719182      | 68          |
| chr12      | 50618824     | 50619277   | 454           | 50618964      | 61          |
| chr12      | 50832152     | 50832844   | 693           | 50832455      | 352         |
| chr12      | 50855891     | 50856438   | 548           | 50856261      | 62          |
| chr12      | 51204402     | 51204940   | 539           | 51204770      | 81          |
| chr12      | 51262865     | 51263240   | 376           | 51263086      | 137         |
| chr12      | 51547811     | 51548202   | 392           | 51548000      | 47          |
| chr12      | 51556436     | 51556908   | 473           | 51556642      | 130         |
| chr12      | 51586461     | 51586751   | 291           | 51586591      | 52          |
| chr12      | 51904068     | 51904391   | 324           | 51904213      | 54          |
| chr12      | 51904655     | 51904928   | 274           | 51904800      | 37          |
| chr12      | 51911911     | 51912510   | 600           | 51912372      | 37          |
| chr12      | 52619560     | 52620057   | 498           | 52619859      | 88          |
| chr12      | 53070173     | 53070812   | 640           | 53070620      | 174         |
| chr12      | 54613333     | 54613626   | 294           | 54613460      | 56          |
| chr12      | 54904303     | 54904735   | 433           | 54904448      | 31          |
| chr12      | 55167960     | 55168334   | 375           | 55168168      | 71          |
| chr12      | 55368171     | 55368739   | 569           | 55368517      | 61          |
| chr12      | 55766433     | 55767129   | 697           | 55766781      | 46          |
| chr12      | 55776160     | 55776592   | 433           | 55776341      | 264         |
| chr12      | 55855538     | 55856238   | 701           | 55855778      | 233         |
| chr12      | 55916510     | 55916826   | 317           | 55916682      | 90          |
| chr12      | 56202148     | 56202799   | 652           | 56202411      | 122         |
| chr12      | 56568595     | 56568986   | 392           | 56568803      | 34          |
| chr12      | 57157042     | 57157271   | 230           | 57157157      | 13          |
| chr12      | 61146696     | 61147193   | 498           | 61146844      | 33          |
| chr12      | 64421287     | 64421790   | 504           | 64421492      | 42          |
| chr12      | 66074740     | 66074984   | 245           | 66074862      | 16          |
| chr12      | 67461443     | 67461697   | 255           | 67461570      | 36          |
| chr12      | 67488538     | 67489200   | 663           | 67488917      | 108         |
| chr12      | 68693218     | 68693906   | 689           | 68693563      | 32          |
| chr12      | 75563677     | 75564251   | 575           | 75564020      | 28          |
| chr12      | 75983306     | 75984156   | 851           | 75983980      | 151         |
| chr12      | 76246236     | 76246532   | 297           | 76246401      | 25          |
| chr12      | 88270345     | 88270730   | 386           | 88270486      | 64          |
| chr12      | 88627030     | 88628077   | 1048          | 88627730      | 72          |
| chr12      | 92040406     | 92040698   | 293           | 92040569      | 29          |
| chr12      | 93120405     | 93120715   | 311           | 93120582      | 78          |
| chr12      | 95111584     | 95111983   | 400           | 95111798      | 84          |
| chr12      | 95137586     | 95138046   | 461           | 95137844      | 69          |

| <b>Chr</b> | <b>Start</b> | <b>End</b> | <b>Length</b> | <b>Summit</b> | <b>Tags</b> |
|------------|--------------|------------|---------------|---------------|-------------|
| chr12      | 95147151     | 95147594   | 444           | 95147342      | 145         |
| chr12      | 97562262     | 97562851   | 590           | 97562477      | 254         |
| chr12      | 100794892    | 100795766  | 875           | 100795464     | 97          |
| chr12      | 102411176    | 102411486  | 311           | 102411328     | 17          |
| chr12      | 103586804    | 103587168  | 365           | 103587039     | 68          |
| chr12      | 104888693    | 104889163  | 471           | 104888964     | 31          |
| chr12      | 105030192    | 105030784  | 593           | 105030542     | 47          |
| chr12      | 105056696    | 105057360  | 665           | 105057067     | 95          |
| chr12      | 106238866    | 106239452  | 587           | 106239156     | 105         |
| chr12      | 107480487    | 107481090  | 604           | 107480910     | 75          |
| chr12      | 107732714    | 107733141  | 428           | 107732937     | 116         |
| chr12      | 107756274    | 107756590  | 317           | 107756429     | 115         |
| chr12      | 108651509    | 108651991  | 483           | 108651861     | 58          |
| chr12      | 108743115    | 108743603  | 489           | 108743329     | 46          |
| chr12      | 109292749    | 109293353  | 605           | 109293147     | 182         |
| chr12      | 110024247    | 110024833  | 587           | 110024492     | 52          |
| chr12      | 112390103    | 112390495  | 393           | 112390334     | 29          |
| chr12      | 112781064    | 112781577  | 514           | 112781243     | 69          |
| chr12      | 115419141    | 115419635  | 495           | 115419452     | 52          |
| chr12      | 115481360    | 115481985  | 626           | 115481498     | 54          |
| chr12      | 116250513    | 116251130  | 618           | 116250861     | 52          |
| chr12      | 118589789    | 118590563  | 775           | 118590218     | 220         |
| chr12      | 119038833    | 119039517  | 685           | 119039128     | 36          |
| chr12      | 119131868    | 119132561  | 694           | 119132229     | 71          |
| chr12      | 119186742    | 119187043  | 302           | 119186916     | 83          |
| chr12      | 119368211    | 119368924  | 714           | 119368540     | 132         |
| chr12      | 119848053    | 119848422  | 370           | 119848242     | 72          |
| chr12      | 120055360    | 120055697  | 338           | 120055531     | 37          |
| chr12      | 120106553    | 120107171  | 619           | 120106762     | 187         |
| chr12      | 120575060    | 120575452  | 393           | 120575294     | 48          |
| chr12      | 120952321    | 120952882  | 562           | 120952521     | 80          |
| chr12      | 121276469    | 121277138  | 670           | 121276814     | 51          |
| chr12      | 121551182    | 121551921  | 740           | 121551533     | 64          |
| chr12      | 121918232    | 121918822  | 591           | 121918546     | 75          |
| chr12      | 121997157    | 121997715  | 559           | 121997457     | 251         |
| chr12      | 122569713    | 122570108  | 396           | 122569864     | 45          |
| chr12      | 123567711    | 123568161  | 451           | 123567974     | 107         |
| chr12      | 123628261    | 123628977  | 717           | 123628685     | 212         |
| chr12      | 123852770    | 123853213  | 444           | 123853042     | 115         |
| chr12      | 123914145    | 123914711  | 567           | 123914559     | 55          |
| chr12      | 123978336    | 123978764  | 429           | 123978510     | 152         |
| chr12      | 123978785    | 123979207  | 423           | 123979005     | 131         |
| chr12      | 126175832    | 126176298  | 467           | 126175959     | 42          |
| chr12      | 129187538    | 129187829  | 292           | 129187676     | 33          |
| chr12      | 130085698    | 130085978  | 281           | 130085820     | 20          |
| chr12      | 130671988    | 130672720  | 733           | 130672356     | 44          |
| chr12      | 130826296    | 130826656  | 361           | 130826535     | 33          |
| chr12      | 130914493    | 130914961  | 469           | 130914642     | 53          |
| chr12      | 130950835    | 130951344  | 510           | 130951013     | 38          |
| chr12      | 131209200    | 131209935  | 736           | 131209562     | 151         |
| chr12      | 131352502    | 131353008  | 507           | 131352775     | 82          |
| chr12      | 131610900    | 131611874  | 975           | 131611305     | 207         |
| chr12      | 131632551    | 131633155  | 605           | 131632747     | 90          |

| Chr   | Start     | End       | Length | Summit    | Tags |
|-------|-----------|-----------|--------|-----------|------|
| chr12 | 131657034 | 131657775 | 742    | 131657421 | 39   |
| chr12 | 132123804 | 132124480 | 677    | 132124079 | 118  |
| chr13 | 19822964  | 19823273  | 310    | 19823121  | 60   |
| chr13 | 19834606  | 19835199  | 594    | 19834993  | 312  |
| chr13 | 19877797  | 19878275  | 479    | 19878016  | 241  |
| chr13 | 19903220  | 19903688  | 469    | 19903409  | 60   |
| chr13 | 24685724  | 24686197  | 474    | 24686031  | 35   |
| chr13 | 25726835  | 25727075  | 241    | 25726955  | 17   |
| chr13 | 26386911  | 26387405  | 495    | 26387062  | 28   |
| chr13 | 29586844  | 29587361  | 518    | 29587201  | 48   |
| chr13 | 30264773  | 30265102  | 330    | 30264935  | 52   |
| chr13 | 30275120  | 30275629  | 510    | 30275250  | 56   |
| chr13 | 30337429  | 30337763  | 335    | 30337609  | 70   |
| chr13 | 31637981  | 31638210  | 230    | 31638096  | 17   |
| chr13 | 36531572  | 36532120  | 549    | 36531923  | 28   |
| chr13 | 38979263  | 38979552  | 290    | 38979429  | 21   |
| chr13 | 39644281  | 39644691  | 411    | 39644544  | 40   |
| chr13 | 39805440  | 39805652  | 213    | 39805546  | 19   |
| chr13 | 44262461  | 44262799  | 339    | 44262611  | 31   |
| chr13 | 44839601  | 44839839  | 239    | 44839720  | 35   |
| chr13 | 47628676  | 47628927  | 252    | 47628802  | 29   |
| chr13 | 47775669  | 47776159  | 491    | 47775982  | 68   |
| chr13 | 50001466  | 50001835  | 370    | 50001656  | 163  |
| chr13 | 51055693  | 51056774  | 1082   | 51056126  | 174  |
| chr13 | 51056839  | 51057417  | 579    | 51057059  | 194  |
| chr13 | 52124769  | 52125244  | 476    | 52124896  | 22   |
| chr13 | 63067933  | 63068220  | 288    | 63068097  | 33   |
| chr13 | 72226281  | 72226525  | 245    | 72226403  | 16   |
| chr13 | 75994173  | 75994439  | 267    | 75994296  | 16   |
| chr13 | 77390320  | 77390932  | 613    | 77390698  | 89   |
| chr13 | 78131027  | 78131450  | 424    | 78131322  | 27   |
| chr13 | 84580502  | 84580959  | 458    | 84580689  | 181  |
| chr13 | 88538309  | 88538839  | 531    | 88538547  | 13   |
| chr13 | 98026156  | 98026907  | 752    | 98026502  | 148  |
| chr13 | 99064424  | 99064946  | 523    | 99064769  | 48   |
| chr13 | 99500672  | 99500997  | 326    | 99500849  | 39   |
| chr13 | 102361763 | 102362111 | 349    | 102361936 | 129  |
| chr13 | 105922553 | 105922840 | 288    | 105922711 | 38   |
| chr13 | 109188403 | 109188935 | 533    | 109188762 | 54   |
| chr13 | 110087061 | 110087415 | 355    | 110087181 | 21   |
| chr13 | 110625669 | 110626050 | 382    | 110625886 | 59   |
| chr13 | 111640332 | 111640647 | 316    | 111640493 | 24   |
| chr13 | 112724809 | 112725223 | 415    | 112724940 | 46   |
| chr13 | 112911100 | 112912038 | 939    | 112911429 | 57   |
| chr13 | 113007479 | 113007822 | 344    | 113007633 | 48   |
| chr13 | 113052309 | 113052660 | 352    | 113052489 | 51   |
| chr13 | 113065619 | 113066133 | 515    | 113065966 | 30   |
| chr13 | 113572395 | 113573725 | 1331   | 113573532 | 304  |
| chr13 | 113825642 | 113825958 | 317    | 113825813 | 30   |
| chr13 | 113987183 | 113987467 | 285    | 113987337 | 27   |
| chr13 | 114018358 | 114018889 | 532    | 114018605 | 32   |
| chr14 | 19881193  | 19881738  | 546    | 19881547  | 144  |
| chr14 | 21696889  | 21697158  | 270    | 21697016  | 35   |

| Chr   | Start    | End      | Length | Summit   | Tags |
|-------|----------|----------|--------|----------|------|
| chr14 | 22092753 | 22093552 | 800    | 22092977 | 218  |
| chr14 | 22378193 | 22378592 | 400    | 22378410 | 221  |
| chr14 | 22388190 | 22388537 | 348    | 22388378 | 50   |
| chr14 | 22518221 | 22518674 | 454    | 22518427 | 354  |
| chr14 | 22519538 | 22520078 | 541    | 22519847 | 263  |
| chr14 | 22676564 | 22676918 | 355    | 22676721 | 71   |
| chr14 | 22840459 | 22841165 | 707    | 22840838 | 37   |
| chr14 | 22905350 | 22906057 | 708    | 22905904 | 125  |
| chr14 | 23771346 | 23771961 | 616    | 23771606 | 53   |
| chr14 | 23848904 | 23849304 | 401    | 23849122 | 64   |
| chr14 | 31404306 | 31404792 | 487    | 31404625 | 35   |
| chr14 | 34000947 | 34001639 | 693    | 34001309 | 79   |
| chr14 | 35365582 | 35365999 | 418    | 35365826 | 143  |
| chr14 | 36710914 | 36711653 | 740    | 36711491 | 63   |
| chr14 | 38971325 | 38971603 | 279    | 38971474 | 22   |
| chr14 | 45090233 | 45090712 | 480    | 45090373 | 34   |
| chr14 | 49597603 | 49597937 | 335    | 49597784 | 109  |
| chr14 | 50358110 | 50358499 | 390    | 50358295 | 65   |
| chr14 | 50931792 | 50932352 | 561    | 50931994 | 87   |
| chr14 | 51187891 | 51188535 | 645    | 51188216 | 23   |
| chr14 | 53493255 | 53493721 | 467    | 53493568 | 25   |
| chr14 | 54563242 | 54563998 | 757    | 54563597 | 46   |
| chr14 | 55116513 | 55116854 | 342    | 55116689 | 18   |
| chr14 | 55555903 | 55556244 | 342    | 55556035 | 15   |
| chr14 | 56648786 | 56649257 | 472    | 56649133 | 19   |
| chr14 | 57932484 | 57933068 | 585    | 57932849 | 46   |
| chr14 | 60051230 | 60051780 | 551    | 60051594 | 30   |
| chr14 | 63390378 | 63390714 | 337    | 63390569 | 62   |
| chr14 | 63654593 | 63654882 | 290    | 63654723 | 32   |
| chr14 | 64216722 | 64217149 | 428    | 64216894 | 144  |
| chr14 | 64259339 | 64259728 | 390    | 64259553 | 86   |
| chr14 | 64541951 | 64542405 | 455    | 64542164 | 93   |
| chr14 | 68212936 | 68213535 | 600    | 68213137 | 120  |
| chr14 | 68242272 | 68242787 | 516    | 68242637 | 43   |
| chr14 | 68328047 | 68328527 | 481    | 68328358 | 23   |
| chr14 | 68478369 | 68478707 | 339    | 68478578 | 42   |
| chr14 | 68689301 | 68689940 | 640    | 68689584 | 77   |
| chr14 | 68727793 | 68728129 | 337    | 68727948 | 22   |
| chr14 | 73339203 | 73339693 | 491    | 73339486 | 33   |
| chr14 | 73342802 | 73343505 | 704    | 73343137 | 76   |
| chr14 | 73797741 | 73798120 | 380    | 73797950 | 100  |
| chr14 | 74029542 | 74030079 | 538    | 74029799 | 44   |
| chr14 | 74054685 | 74054988 | 304    | 74054815 | 24   |
| chr14 | 74489451 | 74489996 | 546    | 74489668 | 170  |
| chr14 | 74538927 | 74539493 | 567    | 74539104 | 91   |
| chr14 | 75521709 | 75522210 | 502    | 75521856 | 38   |
| chr14 | 76067852 | 76068163 | 312    | 76068005 | 66   |
| chr14 | 76086786 | 76087134 | 349    | 76086961 | 144  |
| chr14 | 76492573 | 76493085 | 513    | 76492824 | 37   |
| chr14 | 76543520 | 76543789 | 270    | 76543651 | 42   |
| chr14 | 76569070 | 76569843 | 774    | 76569554 | 265  |
| chr14 | 76805323 | 76805766 | 444    | 76805478 | 45   |
| chr14 | 78815091 | 78815490 | 400    | 78815341 | 61   |

| Chr   | Start     | End       | Length | Summit    | Tags |
|-------|-----------|-----------|--------|-----------|------|
| chr14 | 80756893  | 80757459  | 567    | 80757181  | 21   |
| chr14 | 85068155  | 85068516  | 362    | 85068396  | 49   |
| chr14 | 88576739  | 88577031  | 293    | 88576866  | 31   |
| chr14 | 88781895  | 88782231  | 337    | 88782061  | 17   |
| chr14 | 88964773  | 88965380  | 608    | 88965076  | 44   |
| chr14 | 89490678  | 89491129  | 452    | 89491000  | 22   |
| chr14 | 89980195  | 89980474  | 280    | 89980352  | 22   |
| chr14 | 90105713  | 90106012  | 300    | 90105866  | 33   |
| chr14 | 90334132  | 90334461  | 330    | 90334331  | 23   |
| chr14 | 90694178  | 90694480  | 303    | 90694298  | 28   |
| chr14 | 91045377  | 91046033  | 657    | 91045618  | 128  |
| chr14 | 92049851  | 92050352  | 502    | 92050049  | 48   |
| chr14 | 92462426  | 92462862  | 437    | 92462712  | 41   |
| chr14 | 92528559  | 92529054  | 496    | 92528904  | 40   |
| chr14 | 93473590  | 93473974  | 385    | 93473785  | 177  |
| chr14 | 93495873  | 93496262  | 390    | 93496126  | 39   |
| chr14 | 93536942  | 93537608  | 667    | 93537317  | 61   |
| chr14 | 93665661  | 93665931  | 271    | 93665800  | 23   |
| chr14 | 94692807  | 94693922  | 1116   | 94693506  | 100  |
| chr14 | 94823259  | 94823655  | 397    | 94823459  | 109  |
| chr14 | 95026771  | 95027133  | 363    | 95026901  | 55   |
| chr14 | 95614491  | 95614985  | 495    | 95614643  | 55   |
| chr14 | 95803505  | 95803828  | 324    | 95803636  | 41   |
| chr14 | 95805071  | 95805699  | 629    | 95805353  | 67   |
| chr14 | 98571927  | 98572405  | 479    | 98572219  | 99   |
| chr14 | 98810328  | 98810855  | 528    | 98810729  | 37   |
| chr14 | 98868158  | 98869571  | 1414   | 98869060  | 135  |
| chr14 | 99148894  | 99149358  | 465    | 99149230  | 45   |
| chr14 | 99686915  | 99687552  | 638    | 99687171  | 96   |
| chr14 | 99774501  | 99775050  | 550    | 99774742  | 21   |
| chr14 | 100122612 | 100123312 | 701    | 100122961 | 74   |
| chr14 | 100227663 | 100228126 | 464    | 100228003 | 32   |
| chr14 | 100229280 | 100229716 | 437    | 100229560 | 139  |
| chr14 | 101799179 | 101799522 | 344    | 101799348 | 156  |
| chr14 | 102093829 | 102094223 | 395    | 102094058 | 33   |
| chr14 | 102567642 | 102567882 | 241    | 102567762 | 15   |
| chr14 | 103048665 | 103049611 | 947    | 103049205 | 131  |
| chr14 | 103077024 | 103077455 | 432    | 103077164 | 30   |
| chr14 | 103118348 | 103118787 | 440    | 103118570 | 121  |
| chr14 | 103247949 | 103248550 | 602    | 103248246 | 60   |
| chr14 | 103403371 | 103404151 | 781    | 103403772 | 147  |
| chr14 | 104506042 | 104506590 | 549    | 104506221 | 158  |
| chr14 | 104520151 | 104520608 | 458    | 104520290 | 55   |
| chr14 | 104624574 | 104625967 | 1394   | 104625028 | 435  |
| chr14 | 104630279 | 104631184 | 906    | 104630688 | 173  |
| chr14 | 104634648 | 104635445 | 798    | 104635036 | 203  |
| chr14 | 104652222 | 104652639 | 418    | 104652509 | 41   |
| chr14 | 104703543 | 104704122 | 580    | 104703767 | 77   |
| chr14 | 104704370 | 104705189 | 820    | 104704758 | 296  |
| chr14 | 104720097 | 104720459 | 363    | 104720259 | 26   |
| chr15 | 21219839  | 21220278  | 440    | 21219950  | 25   |
| chr15 | 25367830  | 25368151  | 322    | 25368002  | 20   |
| chr15 | 27174247  | 27174793  | 547    | 27174466  | 21   |

| Chr   | Start    | End      | Length | Summit   | Tags |
|-------|----------|----------|--------|----------|------|
| chr15 | 27349024 | 27349555 | 532    | 27349367 | 32   |
| chr15 | 29405589 | 29406499 | 911    | 29405924 | 54   |
| chr15 | 29418782 | 29419429 | 648    | 29419203 | 80   |
| chr15 | 29544884 | 29545534 | 651    | 29545355 | 73   |
| chr15 | 30738934 | 30739414 | 481    | 30739157 | 40   |
| chr15 | 33398892 | 33399208 | 317    | 33399038 | 44   |
| chr15 | 36152218 | 36152866 | 649    | 36152535 | 83   |
| chr15 | 38320006 | 38320342 | 337    | 38320154 | 69   |
| chr15 | 38439522 | 38439879 | 358    | 38439681 | 126  |
| chr15 | 38535816 | 38536181 | 366    | 38535962 | 81   |
| chr15 | 39032446 | 39033105 | 660    | 39032711 | 35   |
| chr15 | 39883714 | 39884206 | 493    | 39884042 | 125  |
| chr15 | 39885873 | 39886222 | 350    | 39886056 | 42   |
| chr15 | 39909519 | 39910019 | 501    | 39909681 | 53   |
| chr15 | 39928556 | 39929250 | 695    | 39928832 | 55   |
| chr15 | 39938144 | 39938647 | 504    | 39938462 | 36   |
| chr15 | 41590137 | 41590768 | 632    | 41590597 | 55   |
| chr15 | 42961969 | 42962280 | 312    | 42962121 | 30   |
| chr15 | 43213196 | 43213447 | 252    | 43213322 | 23   |
| chr15 | 43242101 | 43242702 | 602    | 43242412 | 238  |
| chr15 | 45881022 | 45881373 | 352    | 45881149 | 19   |
| chr15 | 48434512 | 48435250 | 739    | 48434947 | 116  |
| chr15 | 48766277 | 48766747 | 471    | 48766632 | 29   |
| chr15 | 48844937 | 48845632 | 696    | 48845296 | 34   |
| chr15 | 53487463 | 53488035 | 573    | 53487867 | 154  |
| chr15 | 54323860 | 54324451 | 592    | 54324187 | 39   |
| chr15 | 55691462 | 55691730 | 269    | 55691602 | 32   |
| chr15 | 56205331 | 56206043 | 713    | 56205712 | 27   |
| chr15 | 57535468 | 57535897 | 430    | 57535778 | 16   |
| chr15 | 57965362 | 57965602 | 241    | 57965482 | 27   |
| chr15 | 61236327 | 61237028 | 702    | 61236500 | 246  |
| chr15 | 62241960 | 62242741 | 782    | 62242580 | 140  |
| chr15 | 62406012 | 62406660 | 649    | 62406357 | 37   |
| chr15 | 62846185 | 62846832 | 648    | 62846507 | 38   |
| chr15 | 62973107 | 62973663 | 557    | 62973289 | 80   |
| chr15 | 63325714 | 63326050 | 337    | 63325914 | 76   |
| chr15 | 63365617 | 63366415 | 799    | 63366191 | 73   |
| chr15 | 63609652 | 63610157 | 506    | 63609786 | 40   |
| chr15 | 64643736 | 64644255 | 520    | 64644018 | 40   |
| chr15 | 65226494 | 65226756 | 263    | 65226625 | 34   |
| chr15 | 66351110 | 66351655 | 546    | 66351417 | 43   |
| chr15 | 66384359 | 66384688 | 330    | 66384546 | 48   |
| chr15 | 66720322 | 66720802 | 481    | 66720602 | 237  |
| chr15 | 66874733 | 66875074 | 342    | 66874863 | 21   |
| chr15 | 67764972 | 67765397 | 426    | 67765101 | 21   |
| chr15 | 68275761 | 68276275 | 515    | 68276073 | 88   |
| chr15 | 68331743 | 68332285 | 543    | 68331877 | 130  |
| chr15 | 70282782 | 70283140 | 359    | 70282915 | 53   |
| chr15 | 70301810 | 70302188 | 379    | 70301976 | 119  |
| chr15 | 71655395 | 71655640 | 246    | 71655518 | 16   |
| chr15 | 71776269 | 71776663 | 395    | 71776510 | 87   |
| chr15 | 72077226 | 72077856 | 631    | 72077502 | 99   |
| chr15 | 72625475 | 72625933 | 459    | 72625723 | 61   |

| Chr   | Start    | End      | Length | Summit   | Tags |
|-------|----------|----------|--------|----------|------|
| chr15 | 72878937 | 72879978 | 1042   | 72879335 | 231  |
| chr15 | 73281210 | 73281796 | 587    | 73281456 | 41   |
| chr15 | 73281851 | 73282486 | 636    | 73282150 | 50   |
| chr15 | 73531202 | 73531633 | 432    | 73531445 | 69   |
| chr15 | 73740465 | 73740845 | 381    | 73740678 | 87   |
| chr15 | 73745809 | 73746454 | 646    | 73746218 | 174  |
| chr15 | 73748565 | 73749155 | 591    | 73748774 | 109  |
| chr15 | 73787419 | 73787827 | 409    | 73787618 | 36   |
| chr15 | 73803212 | 73803641 | 430    | 73803415 | 66   |
| chr15 | 73807622 | 73808132 | 511    | 73807947 | 38   |
| chr15 | 74117960 | 74118235 | 276    | 74118104 | 25   |
| chr15 | 74230238 | 74230714 | 477    | 74230467 | 89   |
| chr15 | 75115216 | 75115754 | 539    | 75115598 | 57   |
| chr15 | 75606571 | 75607065 | 495    | 75606779 | 48   |
| chr15 | 77067878 | 77068225 | 348    | 77068024 | 76   |
| chr15 | 78003041 | 78003473 | 433    | 78003345 | 22   |
| chr15 | 78688147 | 78688390 | 244    | 78688269 | 15   |
| chr15 | 78859335 | 78859757 | 423    | 78859502 | 25   |
| chr15 | 78860001 | 78860349 | 349    | 78860172 | 51   |
| chr15 | 79080537 | 79081239 | 703    | 79080846 | 57   |
| chr15 | 79548578 | 79548884 | 307    | 79548753 | 30   |
| chr15 | 80434188 | 80434630 | 443    | 80434376 | 28   |
| chr15 | 80544679 | 80545297 | 619    | 80544981 | 66   |
| chr15 | 80585015 | 80585662 | 648    | 80585371 | 29   |
| chr15 | 80741563 | 80742172 | 610    | 80741901 | 37   |
| chr15 | 80778634 | 80779209 | 576    | 80778981 | 108  |
| chr15 | 80820563 | 80821148 | 586    | 80820884 | 41   |
| chr15 | 80931265 | 80931895 | 631    | 80931580 | 63   |
| chr15 | 80979661 | 80980240 | 580    | 80979950 | 26   |
| chr15 | 81744103 | 81744996 | 894    | 81744487 | 192  |
| chr15 | 81748244 | 81748694 | 451    | 81748464 | 164  |
| chr15 | 81838569 | 81839204 | 636    | 81838768 | 203  |
| chr15 | 82652548 | 82653227 | 680    | 82652924 | 82   |
| chr15 | 82689596 | 82690149 | 554    | 82689876 | 33   |
| chr15 | 83541794 | 83542313 | 520    | 83541979 | 78   |
| chr15 | 83578634 | 83579282 | 649    | 83578957 | 29   |
| chr15 | 84096809 | 84097148 | 340    | 84096956 | 108  |
| chr15 | 84116748 | 84117279 | 532    | 84117119 | 87   |
| chr15 | 86890522 | 86890987 | 466    | 86890847 | 32   |
| chr15 | 86965237 | 86966068 | 832    | 86965549 | 312  |
| chr15 | 87587894 | 87588288 | 395    | 87588074 | 125  |
| chr15 | 87723605 | 87723982 | 378    | 87723858 | 45   |
| chr15 | 88302252 | 88302778 | 527    | 88302490 | 60   |
| chr15 | 88535141 | 88535609 | 469    | 88535428 | 216  |
| chr15 | 88556695 | 88557317 | 623    | 88556914 | 72   |
| chr15 | 88609982 | 88610473 | 492    | 88610186 | 20   |
| chr15 | 89279180 | 89279671 | 492    | 89279385 | 40   |
| chr15 | 89298766 | 89299475 | 710    | 89299123 | 51   |
| chr15 | 89366238 | 89366786 | 549    | 89366408 | 46   |
| chr15 | 90210925 | 90211663 | 739    | 90211339 | 157  |
| chr15 | 90297610 | 90298130 | 521    | 90297785 | 131  |
| chr15 | 91175828 | 91176318 | 491    | 91176144 | 77   |
| chr15 | 96484681 | 96485091 | 411    | 96484860 | 54   |



| <b>Chr</b> | <b>Start</b> | <b>End</b> | <b>Length</b> | <b>Summit</b> | <b>Tags</b> |
|------------|--------------|------------|---------------|---------------|-------------|
| chr15      | 97121218     | 97121548   | 331           | 97121396      | 128         |
| chr15      | 98090407     | 98091622   | 1216          | 98091382      | 174         |
| chr15      | 99235076     | 99235573   | 498           | 99235370      | 47          |
| chr15      | 99287284     | 99287693   | 410           | 99287465      | 33          |
| chr15      | 99470281     | 99470842   | 562           | 99470659      | 145         |
| chr15      | 99531934     | 99532272   | 339           | 99532100      | 138         |
| chr15      | 99716586     | 99717013   | 428           | 99716820      | 196         |
| chr15      | 99739561     | 99739920   | 360           | 99739741      | 42          |
| chr16      | 295982       | 296321     | 340           | 296155        | 43          |
| chr16      | 344095       | 344796     | 702           | 344415        | 73          |
| chr16      | 391546       | 392133     | 588           | 391778        | 48          |
| chr16      | 545123       | 545399     | 277           | 545269        | 37          |
| chr16      | 582460       | 583057     | 598           | 582679        | 261         |
| chr16      | 585923       | 586431     | 509           | 586151        | 27          |
| chr16      | 666590       | 667462     | 873           | 667123        | 238         |
| chr16      | 1026831      | 1027391    | 561           | 1027141       | 146         |
| chr16      | 1337371      | 1337872    | 502           | 1337643       | 72          |
| chr16      | 1481197      | 1481655    | 459           | 1481398       | 48          |
| chr16      | 1518328      | 1518919    | 592           | 1518581       | 28          |
| chr16      | 1520156      | 1521142    | 987           | 1520505       | 146         |
| chr16      | 1695919      | 1696412    | 494           | 1696248       | 74          |
| chr16      | 1919977      | 1920436    | 460           | 1920278       | 22          |
| chr16      | 1939576      | 1940463    | 888           | 1940097       | 132         |
| chr16      | 1942535      | 1943007    | 473           | 1942659       | 28          |
| chr16      | 2078758      | 2079192    | 435           | 2079013       | 160         |
| chr16      | 2119736      | 2120318    | 583           | 2120034       | 38          |
| chr16      | 2146462      | 2147060    | 599           | 2146687       | 39          |
| chr16      | 2153146      | 2153685    | 540           | 2153410       | 45          |
| chr16      | 2458188      | 2459028    | 841           | 2458615       | 132         |
| chr16      | 2507153      | 2507458    | 306           | 2507317       | 36          |
| chr16      | 2523292      | 2523450    | 159           | 2523371       | 24          |
| chr16      | 2742295      | 2743145    | 851           | 2742636       | 50          |
| chr16      | 2914700      | 2915189    | 490           | 2915059       | 45          |
| chr16      | 2952137      | 2952616    | 480           | 2952331       | 91          |
| chr16      | 3013373      | 3014082    | 710           | 3013618       | 55          |
| chr16      | 3090002      | 3090513    | 512           | 3090361       | 90          |
| chr16      | 3108070      | 3108506    | 437           | 3108301       | 44          |
| chr16      | 4243641      | 4244295    | 655           | 4244000       | 150         |
| chr16      | 4286913      | 4287491    | 579           | 4287223       | 58          |
| chr16      | 4310329      | 4311002    | 674           | 4310668       | 117         |
| chr16      | 4608873      | 4609264    | 392           | 4609067       | 127         |
| chr16      | 4887327      | 4887853    | 527           | 4887516       | 52          |
| chr16      | 4912654      | 4912955    | 302           | 4912790       | 61          |
| chr16      | 4921371      | 4921748    | 378           | 4921570       | 63          |
| chr16      | 4934698      | 4935190    | 493           | 4935017       | 69          |
| chr16      | 8731629      | 8731925    | 297           | 8731758       | 82          |
| chr16      | 8865379      | 8865807    | 429           | 8865659       | 62          |
| chr16      | 10595840     | 10596343   | 504           | 10596155      | 334         |
| chr16      | 10617975     | 10618390   | 416           | 10618128      | 48          |
| chr16      | 10861083     | 10861380   | 298           | 10861212      | 44          |
| chr16      | 11498674     | 11499136   | 463           | 11498891      | 189         |
| chr16      | 11660314     | 11661058   | 745           | 11660660      | 200         |
| chr16      | 11678199     | 11678628   | 430           | 11678443      | 100         |

| Chr   | Start    | End      | Length | Summit   | Tags |
|-------|----------|----------|--------|----------|------|
| chr16 | 14360091 | 14360503 | 413    | 14360248 | 69   |
| chr16 | 14710196 | 14710599 | 404    | 14710404 | 38   |
| chr16 | 14749383 | 14749813 | 431    | 14749531 | 26   |
| chr16 | 14854134 | 14854385 | 252    | 14854260 | 20   |
| chr16 | 15990540 | 15991043 | 504    | 15990671 | 29   |
| chr16 | 16252665 | 16252885 | 221    | 16252775 | 20   |
| chr16 | 19798196 | 19798472 | 277    | 19798326 | 45   |
| chr16 | 21069562 | 21069862 | 301    | 21069744 | 23   |
| chr16 | 21343640 | 21343973 | 334    | 21343769 | 35   |
| chr16 | 21430493 | 21431232 | 740    | 21430861 | 50   |
| chr16 | 21775795 | 21776228 | 434    | 21776071 | 36   |
| chr16 | 22233527 | 22234156 | 630    | 22233711 | 146  |
| chr16 | 22432563 | 22433013 | 451    | 22432717 | 51   |
| chr16 | 23198513 | 23198841 | 329    | 23198654 | 44   |
| chr16 | 27145214 | 27145688 | 475    | 27145374 | 35   |
| chr16 | 27235993 | 27236515 | 523    | 27236331 | 76   |
| chr16 | 27377057 | 27377560 | 504    | 27377265 | 47   |
| chr16 | 27424407 | 27424914 | 508    | 27424591 | 45   |
| chr16 | 27839402 | 27839814 | 413    | 27839662 | 47   |
| chr16 | 28281191 | 28281694 | 504    | 28281497 | 40   |
| chr16 | 28541858 | 28542417 | 560    | 28542192 | 37   |
| chr16 | 28557075 | 28557481 | 407    | 28557281 | 53   |
| chr16 | 29064608 | 29064985 | 378    | 29064780 | 73   |
| chr16 | 29137435 | 29137798 | 364    | 29137639 | 65   |
| chr16 | 29170088 | 29170743 | 656    | 29170451 | 74   |
| chr16 | 29322342 | 29322639 | 298    | 29322475 | 33   |
| chr16 | 29424138 | 29424432 | 295    | 29424264 | 26   |
| chr16 | 30014667 | 30015412 | 746    | 30015062 | 53   |
| chr16 | 30617731 | 30618234 | 504    | 30617958 | 24   |
| chr16 | 30868015 | 30868437 | 423    | 30868256 | 51   |
| chr16 | 30868870 | 30869456 | 587    | 30869150 | 103  |
| chr16 | 31120345 | 31120848 | 504    | 31120471 | 36   |
| chr16 | 31370576 | 31371029 | 454    | 31370732 | 80   |
| chr16 | 45354664 | 45355058 | 395    | 45354840 | 24   |
| chr16 | 46612084 | 46612611 | 528    | 46612415 | 24   |
| chr16 | 47563223 | 47563549 | 327    | 47563370 | 79   |
| chr16 | 47708203 | 47708601 | 399    | 47708490 | 31   |
| chr16 | 48294100 | 48294706 | 607    | 48294507 | 127  |
| chr16 | 51633160 | 51633546 | 387    | 51633304 | 204  |
| chr16 | 53520656 | 53521354 | 699    | 53521011 | 32   |
| chr16 | 54926038 | 54926567 | 530    | 54926352 | 131  |
| chr16 | 55199509 | 55200082 | 574    | 55199909 | 239  |
| chr16 | 55652777 | 55653203 | 427    | 55652901 | 29   |
| chr16 | 55766393 | 55766782 | 390    | 55766522 | 18   |
| chr16 | 56210924 | 56211736 | 813    | 56211469 | 136  |
| chr16 | 56245381 | 56245728 | 348    | 56245557 | 49   |
| chr16 | 56333001 | 56333353 | 353    | 56333128 | 23   |
| chr16 | 56407729 | 56408209 | 481    | 56407944 | 32   |
| chr16 | 65459302 | 65459873 | 572    | 65459466 | 78   |
| chr16 | 65526655 | 65527223 | 569    | 65526811 | 79   |
| chr16 | 65539731 | 65540100 | 370    | 65539867 | 37   |
| chr16 | 65989254 | 65989759 | 506    | 65989476 | 140  |
| chr16 | 66135774 | 66136381 | 608    | 66136046 | 77   |

| Chr   | Start    | End      | Length | Summit   | Tags |
|-------|----------|----------|--------|----------|------|
| chr16 | 66552965 | 66553436 | 472    | 66553215 | 193  |
| chr16 | 66557423 | 66558050 | 628    | 66557783 | 43   |
| chr16 | 66826404 | 66827157 | 754    | 66826535 | 61   |
| chr16 | 66938536 | 66939020 | 485    | 66938709 | 25   |
| chr16 | 67197184 | 67197508 | 325    | 67197309 | 53   |
| chr16 | 67249733 | 67250213 | 481    | 67249959 | 168  |
| chr16 | 67298687 | 67299214 | 528    | 67298874 | 201  |
| chr16 | 67921775 | 67922345 | 571    | 67922105 | 31   |
| chr16 | 69273075 | 69273725 | 651    | 69273493 | 64   |
| chr16 | 69291105 | 69292065 | 961    | 69291677 | 259  |
| chr16 | 69306610 | 69306968 | 359    | 69306810 | 67   |
| chr16 | 73404493 | 73404952 | 460    | 73404757 | 152  |
| chr16 | 73433893 | 73434347 | 455    | 73434021 | 44   |
| chr16 | 73466177 | 73466659 | 483    | 73466419 | 35   |
| chr16 | 73896710 | 73897011 | 302    | 73896866 | 36   |
| chr16 | 73985051 | 73985522 | 472    | 73985396 | 38   |
| chr16 | 74077388 | 74077774 | 387    | 74077565 | 177  |
| chr16 | 74111270 | 74111557 | 288    | 74111437 | 21   |
| chr16 | 78249581 | 78250068 | 488    | 78249876 | 55   |
| chr16 | 78440154 | 78440655 | 502    | 78440298 | 61   |
| chr16 | 78476752 | 78477031 | 280    | 78476877 | 31   |
| chr16 | 80038029 | 80038268 | 240    | 80038149 | 26   |
| chr16 | 80090558 | 80091372 | 815    | 80090960 | 168  |
| chr16 | 80096082 | 80096373 | 292    | 80096243 | 29   |
| chr16 | 80118011 | 80118362 | 352    | 80118141 | 36   |
| chr16 | 80122547 | 80122920 | 374    | 80122739 | 208  |
| chr16 | 80192332 | 80192645 | 314    | 80192461 | 51   |
| chr16 | 80212554 | 80212950 | 397    | 80212764 | 47   |
| chr16 | 80216257 | 80216895 | 639    | 80216592 | 43   |
| chr16 | 80520244 | 80520676 | 433    | 80520400 | 83   |
| chr16 | 81225035 | 81225516 | 482    | 81225249 | 191  |
| chr16 | 82544035 | 82544408 | 374    | 82544222 | 34   |
| chr16 | 82584621 | 82584939 | 319    | 82584816 | 22   |
| chr16 | 82787932 | 82788549 | 618    | 82788188 | 72   |
| chr16 | 83092269 | 83093041 | 773    | 83092633 | 282  |
| chr16 | 83234250 | 83234539 | 290    | 83234381 | 51   |
| chr16 | 83743640 | 83744276 | 637    | 83743948 | 141  |
| chr16 | 83904584 | 83904964 | 381    | 83904781 | 71   |
| chr16 | 83951307 | 83952119 | 813    | 83951744 | 200  |
| chr16 | 83975529 | 83976531 | 1003   | 83976247 | 280  |
| chr16 | 84105840 | 84106175 | 336    | 84105965 | 29   |
| chr16 | 84287661 | 84288399 | 739    | 84288037 | 147  |
| chr16 | 84306800 | 84307114 | 315    | 84306971 | 71   |
| chr16 | 84342019 | 84342755 | 737    | 84342326 | 255  |
| chr16 | 84343146 | 84343728 | 583    | 84343405 | 130  |
| chr16 | 85983121 | 85983652 | 532    | 85983315 | 34   |
| chr16 | 86218083 | 86218347 | 265    | 86218208 | 34   |
| chr16 | 86381070 | 86381538 | 469    | 86381264 | 194  |
| chr16 | 86398001 | 86398643 | 643    | 86398295 | 136  |
| chr16 | 86414255 | 86414692 | 438    | 86414411 | 68   |
| chr16 | 86515611 | 86516085 | 475    | 86515948 | 59   |
| chr16 | 86541915 | 86542484 | 570    | 86542151 | 38   |
| chr16 | 86698704 | 86699169 | 466    | 86698872 | 41   |

| Chr   | Start    | End      | Length | Summit   | Tags |
|-------|----------|----------|--------|----------|------|
| chr16 | 86775625 | 86776022 | 398    | 86775840 | 56   |
| chr16 | 86889302 | 86889717 | 416    | 86889489 | 106  |
| chr16 | 87046930 | 87047902 | 973    | 87047570 | 46   |
| chr16 | 87104390 | 87104762 | 373    | 87104510 | 65   |
| chr16 | 87131130 | 87131484 | 355    | 87131313 | 56   |
| chr16 | 87279151 | 87279977 | 827    | 87279620 | 45   |
| chr16 | 87333134 | 87334168 | 1035   | 87333496 | 46   |
| chr16 | 87425471 | 87426157 | 687    | 87425882 | 92   |
| chr16 | 87473338 | 87473835 | 498    | 87473661 | 105  |
| chr16 | 87744034 | 87744406 | 373    | 87744208 | 88   |
| chr16 | 87772398 | 87772882 | 485    | 87772539 | 29   |
| chr16 | 87973483 | 87973756 | 274    | 87973611 | 52   |
| chr16 | 88035924 | 88036345 | 422    | 88036112 | 107  |
| chr16 | 88070336 | 88070842 | 507    | 88070465 | 87   |
| chr16 | 88101689 | 88102529 | 841    | 88101945 | 36   |
| chr16 | 88194395 | 88194819 | 425    | 88194525 | 37   |
| chr16 | 88196327 | 88196792 | 466    | 88196516 | 100  |
| chr16 | 88474914 | 88475412 | 499    | 88475081 | 38   |
| chr16 | 88517004 | 88517622 | 619    | 88517387 | 65   |
| chr17 | 639849   | 640348   | 500    | 640158   | 42   |
| chr17 | 753891   | 754312   | 422    | 754189   | 26   |
| chr17 | 822866   | 823356   | 491    | 823229   | 26   |
| chr17 | 941653   | 942193   | 541    | 942035   | 75   |
| chr17 | 1037159  | 1037500  | 342    | 1037386  | 22   |
| chr17 | 1400882  | 1401341  | 460    | 1401126  | 55   |
| chr17 | 1477868  | 1478655  | 788    | 1478265  | 54   |
| chr17 | 1574722  | 1575413  | 692    | 1575076  | 102  |
| chr17 | 1596916  | 1597631  | 716    | 1597259  | 27   |
| chr17 | 1614224  | 1614684  | 461    | 1614543  | 38   |
| chr17 | 1831495  | 1832051  | 557    | 1831749  | 41   |
| chr17 | 2413126  | 2413693  | 568    | 2413356  | 59   |
| chr17 | 2751825  | 2752540  | 716    | 2752173  | 60   |
| chr17 | 2830967  | 2831265  | 299    | 2831098  | 36   |
| chr17 | 3413005  | 3413492  | 488    | 3413128  | 34   |
| chr17 | 3507896  | 3508193  | 298    | 3508070  | 33   |
| chr17 | 3738179  | 3738764  | 586    | 3738435  | 44   |
| chr17 | 4640400  | 4640861  | 462    | 4640711  | 35   |
| chr17 | 4703792  | 4704160  | 369    | 4704035  | 30   |
| chr17 | 4716052  | 4716294  | 243    | 4716173  | 25   |
| chr17 | 4753918  | 4754234  | 317    | 4754089  | 52   |
| chr17 | 4879161  | 4879634  | 474    | 4879469  | 23   |
| chr17 | 5428476  | 5429029  | 554    | 5428737  | 42   |
| chr17 | 6499025  | 6499485  | 461    | 6499365  | 24   |
| chr17 | 6839792  | 6840377  | 586    | 6839980  | 81   |
| chr17 | 7195558  | 7196272  | 715    | 7195739  | 49   |
| chr17 | 7432495  | 7433002  | 508    | 7432755  | 35   |
| chr17 | 9963837  | 9964182  | 346    | 9964044  | 35   |
| chr17 | 15792301 | 15792622 | 322    | 15792497 | 22   |
| chr17 | 15807856 | 15808178 | 323    | 15808019 | 42   |
| chr17 | 16058944 | 16059576 | 633    | 16059260 | 60   |
| chr17 | 16617143 | 16617382 | 240    | 16617263 | 24   |
| chr17 | 16667588 | 16668318 | 731    | 16667974 | 78   |
| chr17 | 16864116 | 16864579 | 464    | 16864319 | 36   |

| <b>Chr</b> | <b>Start</b> | <b>End</b> | <b>Length</b> | <b>Summit</b> | <b>Tags</b> |
|------------|--------------|------------|---------------|---------------|-------------|
| chr17      | 17000024     | 17000449   | 426           | 17000243      | 126         |
| chr17      | 17355777     | 17356401   | 625           | 17356116      | 46          |
| chr17      | 17596087     | 17596646   | 560           | 17596421      | 81          |
| chr17      | 17967325     | 17967855   | 531           | 17967651      | 31          |
| chr17      | 18027324     | 18028130   | 807           | 18027814      | 125         |
| chr17      | 18069315     | 18069772   | 458           | 18069438      | 33          |
| chr17      | 18079558     | 18080203   | 646           | 18079918      | 52          |
| chr17      | 18090888     | 18091462   | 575           | 18091127      | 128         |
| chr17      | 18221267     | 18221934   | 668           | 18221707      | 41          |
| chr17      | 18292514     | 18293071   | 558           | 18292832      | 131         |
| chr17      | 18386365     | 18386654   | 290           | 18386487      | 28          |
| chr17      | 18843831     | 18844319   | 489           | 18844120      | 24          |
| chr17      | 18860263     | 18860918   | 656           | 18860653      | 64          |
| chr17      | 18908914     | 18909511   | 598           | 18909208      | 26          |
| chr17      | 19030616     | 19030984   | 369           | 19030869      | 28          |
| chr17      | 19035051     | 19035474   | 424           | 19035174      | 21          |
| chr17      | 19550805     | 19551439   | 635           | 19551174      | 40          |
| chr17      | 19567895     | 19568374   | 480           | 19568058      | 62          |
| chr17      | 19596860     | 19597390   | 531           | 19597222      | 196         |
| chr17      | 20245493     | 20245758   | 266           | 20245633      | 23          |
| chr17      | 20339117     | 20339848   | 732           | 20339496      | 84          |
| chr17      | 21161118     | 21161557   | 440           | 21161412      | 48          |
| chr17      | 21219759     | 21220264   | 506           | 21219933      | 44          |
| chr17      | 21240075     | 21240492   | 418           | 21240347      | 33          |
| chr17      | 22682457     | 22682792   | 336           | 22682573      | 19          |
| chr17      | 22807225     | 22807983   | 759           | 22807538      | 118         |
| chr17      | 23686655     | 23687228   | 574           | 23686838      | 75          |
| chr17      | 23758728     | 23759114   | 387           | 23758928      | 95          |
| chr17      | 23856624     | 23857378   | 755           | 23857150      | 64          |
| chr17      | 23858799     | 23859384   | 586           | 23859218      | 260         |
| chr17      | 24094137     | 24094737   | 601           | 24094348      | 192         |
| chr17      | 24231608     | 24232163   | 556           | 24231860      | 92          |
| chr17      | 24247848     | 24248580   | 733           | 24248176      | 262         |
| chr17      | 24443124     | 24443744   | 621           | 24443382      | 55          |
| chr17      | 24462931     | 24463467   | 537           | 24463114      | 160         |
| chr17      | 24932972     | 24933657   | 686           | 24933240      | 126         |
| chr17      | 24934957     | 24935417   | 461           | 24935153      | 70          |
| chr17      | 24990463     | 24990769   | 307           | 24990624      | 79          |
| chr17      | 26175673     | 26176165   | 493           | 26176016      | 33          |
| chr17      | 26866533     | 26866835   | 303           | 26866660      | 30          |
| chr17      | 26900744     | 26901400   | 657           | 26901098      | 177         |
| chr17      | 28515157     | 28515466   | 310           | 28515341      | 28          |
| chr17      | 29648979     | 29649505   | 527           | 29649133      | 20          |
| chr17      | 32789797     | 32790622   | 826           | 32790167      | 39          |
| chr17      | 32840940     | 32841519   | 580           | 32841297      | 37          |
| chr17      | 33024156     | 33024450   | 295           | 33024279      | 17          |
| chr17      | 33858989     | 33859514   | 526           | 33859230      | 144         |
| chr17      | 33863124     | 33863732   | 609           | 33863468      | 63          |
| chr17      | 34787311     | 34787852   | 542           | 34787585      | 63          |
| chr17      | 35035809     | 35036395   | 587           | 35036070      | 108         |
| chr17      | 35356737     | 35357083   | 347           | 35356916      | 116         |
| chr17      | 35586507     | 35586912   | 406           | 35586738      | 167         |
| chr17      | 35604042     | 35604408   | 367           | 35604241      | 223         |

| Chr   | Start    | End      | Length | Summit   | Tags |
|-------|----------|----------|--------|----------|------|
| chr17 | 35759700 | 35760128 | 429    | 35759941 | 65   |
| chr17 | 35772450 | 35772782 | 333    | 35772589 | 28   |
| chr17 | 35899969 | 35900534 | 566    | 35900351 | 37   |
| chr17 | 35919913 | 35920350 | 438    | 35920155 | 134  |
| chr17 | 35957279 | 35957648 | 370    | 35957475 | 145  |
| chr17 | 35992093 | 35992370 | 278    | 35992242 | 82   |
| chr17 | 36804478 | 36804811 | 334    | 36804664 | 46   |
| chr17 | 36997856 | 36998400 | 545    | 36998037 | 65   |
| chr17 | 37035281 | 37035718 | 438    | 37035514 | 53   |
| chr17 | 37061237 | 37061767 | 531    | 37061525 | 105  |
| chr17 | 37063724 | 37064412 | 689    | 37064097 | 101  |
| chr17 | 37065226 | 37065920 | 695    | 37065656 | 199  |
| chr17 | 37210366 | 37210928 | 563    | 37210529 | 171  |
| chr17 | 37328558 | 37329100 | 543    | 37328922 | 83   |
| chr17 | 37473370 | 37473788 | 419    | 37473613 | 41   |
| chr17 | 37812935 | 37813356 | 422    | 37813229 | 17   |
| chr17 | 37958637 | 37959312 | 676    | 37959002 | 54   |
| chr17 | 37983076 | 37983572 | 497    | 37983404 | 46   |
| chr17 | 38077462 | 38078169 | 708    | 38077827 | 222  |
| chr17 | 38150207 | 38150741 | 535    | 38150533 | 26   |
| chr17 | 38851690 | 38852242 | 553    | 38851874 | 157  |
| chr17 | 39223184 | 39223746 | 563    | 39223403 | 41   |
| chr17 | 39519714 | 39520202 | 489    | 39519984 | 68   |
| chr17 | 39571183 | 39571536 | 354    | 39571367 | 118  |
| chr17 | 39781496 | 39782268 | 773    | 39781852 | 151  |
| chr17 | 40576796 | 40577269 | 474    | 40577104 | 137  |
| chr17 | 40603919 | 40604525 | 607    | 40604196 | 45   |
| chr17 | 40804551 | 40805234 | 684    | 40804999 | 117  |
| chr17 | 40864559 | 40865253 | 695    | 40864890 | 62   |
| chr17 | 41017606 | 41018245 | 640    | 41017941 | 39   |
| chr17 | 43458863 | 43459285 | 423    | 43459066 | 85   |
| chr17 | 44110742 | 44111186 | 445    | 44111013 | 37   |
| chr17 | 44263121 | 44263644 | 524    | 44263315 | 63   |
| chr17 | 44940405 | 44940764 | 360    | 44940595 | 176  |
| chr17 | 44956007 | 44956403 | 397    | 44956199 | 156  |
| chr17 | 45412996 | 45413517 | 522    | 45413326 | 79   |
| chr17 | 45469601 | 45470297 | 697    | 45469939 | 56   |
| chr17 | 45494669 | 45495316 | 648    | 45495046 | 232  |
| chr17 | 45581103 | 45581641 | 539    | 45581289 | 145  |
| chr17 | 45829581 | 45830113 | 533    | 45829938 | 55   |
| chr17 | 45955729 | 45956019 | 291    | 45955886 | 71   |
| chr17 | 45972409 | 45972984 | 576    | 45972570 | 163  |
| chr17 | 46042079 | 46042712 | 634    | 46042325 | 53   |
| chr17 | 46219347 | 46220034 | 688    | 46219643 | 68   |
| chr17 | 46231414 | 46231857 | 444    | 46231611 | 143  |
| chr17 | 46381761 | 46382214 | 454    | 46382063 | 55   |
| chr17 | 46386607 | 46387230 | 624    | 46386777 | 256  |
| chr17 | 46585829 | 46586371 | 543    | 46586188 | 161  |
| chr17 | 50753003 | 50753322 | 320    | 50753157 | 24   |
| chr17 | 52392737 | 52393562 | 826    | 52393110 | 69   |
| chr17 | 52414781 | 52415104 | 324    | 52414947 | 122  |
| chr17 | 52517311 | 52517802 | 492    | 52517592 | 36   |
| chr17 | 52628510 | 52628825 | 316    | 52628631 | 27   |

| Chr   | Start    | End      | Length | Summit   | Tags |
|-------|----------|----------|--------|----------|------|
| chr17 | 52669315 | 52669628 | 314    | 52669488 | 40   |
| chr17 | 52725565 | 52725900 | 336    | 52725745 | 101  |
| chr17 | 52956244 | 52956628 | 385    | 52956463 | 111  |
| chr17 | 53108333 | 53108767 | 435    | 53108625 | 72   |
| chr17 | 53300420 | 53301108 | 689    | 53300647 | 43   |
| chr17 | 53331532 | 53332180 | 649    | 53331971 | 106  |
| chr17 | 53333819 | 53334142 | 324    | 53333971 | 28   |
| chr17 | 53525422 | 53525691 | 270    | 53525561 | 25   |
| chr17 | 53797024 | 53797400 | 377    | 53797230 | 63   |
| chr17 | 55514428 | 55514743 | 316    | 55514603 | 20   |
| chr17 | 56032019 | 56032631 | 613    | 56032397 | 127  |
| chr17 | 56835885 | 56836740 | 856    | 56836282 | 230  |
| chr17 | 56844147 | 56844961 | 815    | 56844424 | 259  |
| chr17 | 58101203 | 58102008 | 806    | 58101587 | 130  |
| chr17 | 58155776 | 58156123 | 348    | 58155960 | 54   |
| chr17 | 58210050 | 58210458 | 409    | 58210306 | 34   |
| chr17 | 59172559 | 59173206 | 648    | 59172831 | 27   |
| chr17 | 59577190 | 59577700 | 511    | 59577561 | 29   |
| chr17 | 60988386 | 60988785 | 400    | 60988665 | 38   |
| chr17 | 62102894 | 62103347 | 454    | 62103020 | 36   |
| chr17 | 62373717 | 62374326 | 610    | 62374037 | 43   |
| chr17 | 63064633 | 63065018 | 386    | 63064773 | 33   |
| chr17 | 63178045 | 63178344 | 300    | 63178191 | 54   |
| chr17 | 63706827 | 63707424 | 598    | 63707133 | 25   |
| chr17 | 64834446 | 64835220 | 775    | 64834828 | 100  |
| chr17 | 67924106 | 67924512 | 407    | 67924290 | 198  |
| chr17 | 68732460 | 68732893 | 434    | 68732620 | 177  |
| chr17 | 68823315 | 68823575 | 261    | 68823445 | 19   |
| chr17 | 69132730 | 69133296 | 567    | 69132936 | 97   |
| chr17 | 69133644 | 69134207 | 564    | 69133832 | 93   |
| chr17 | 69853522 | 69853846 | 325    | 69853684 | 37   |
| chr17 | 70267958 | 70268525 | 568    | 70268307 | 49   |
| chr17 | 70380351 | 70381029 | 679    | 70380732 | 214  |
| chr17 | 70428768 | 70429278 | 511    | 70428905 | 56   |
| chr17 | 70451789 | 70452308 | 520    | 70451987 | 85   |
| chr17 | 70472666 | 70473192 | 527    | 70473055 | 58   |
| chr17 | 70859724 | 70860165 | 442    | 70859900 | 30   |
| chr17 | 71048091 | 71048417 | 327    | 71048219 | 34   |
| chr17 | 71192449 | 71192976 | 528    | 71192815 | 137  |
| chr17 | 71208194 | 71208590 | 397    | 71208432 | 104  |
| chr17 | 71228591 | 71229635 | 1045   | 71229035 | 280  |
| chr17 | 71230874 | 71231390 | 517    | 71231082 | 39   |
| chr17 | 71292393 | 71293039 | 647    | 71292826 | 42   |
| chr17 | 71293063 | 71293563 | 501    | 71293221 | 47   |
| chr17 | 71352585 | 71353368 | 784    | 71353003 | 77   |
| chr17 | 71579719 | 71580410 | 692    | 71579917 | 111  |
| chr17 | 71639849 | 71640532 | 684    | 71640068 | 147  |
| chr17 | 71775740 | 71776252 | 513    | 71776041 | 43   |
| chr17 | 71938928 | 71939429 | 502    | 71939117 | 20   |
| chr17 | 71992409 | 71992920 | 512    | 71992573 | 29   |
| chr17 | 72089108 | 72089518 | 411    | 72089387 | 31   |
| chr17 | 72094541 | 72095032 | 492    | 72094749 | 46   |
| chr17 | 72174612 | 72175016 | 405    | 72174800 | 31   |

| Chr   | Start    | End      | Length | Summit   | Tags |
|-------|----------|----------|--------|----------|------|
| chr17 | 72793451 | 72794385 | 935    | 72793949 | 165  |
| chr17 | 72795899 | 72796337 | 439    | 72796046 | 58   |
| chr17 | 72813945 | 72814342 | 398    | 72814141 | 168  |
| chr17 | 72961788 | 72962478 | 691    | 72962058 | 119  |
| chr17 | 72986826 | 72987298 | 473    | 72987125 | 60   |
| chr17 | 73780311 | 73780780 | 470    | 73780501 | 36   |
| chr17 | 73859226 | 73859660 | 435    | 73859464 | 119  |
| chr17 | 74440055 | 74440448 | 394    | 74440248 | 26   |
| chr17 | 74735840 | 74736137 | 298    | 74735995 | 41   |
| chr17 | 75348594 | 75348890 | 297    | 75348722 | 22   |
| chr17 | 75613543 | 75614052 | 510    | 75613691 | 37   |
| chr17 | 75697800 | 75698488 | 689    | 75698181 | 342  |
| chr17 | 75780246 | 75780598 | 353    | 75780469 | 22   |
| chr17 | 76089637 | 76090327 | 691    | 76089945 | 44   |
| chr17 | 76163615 | 76164119 | 505    | 76163928 | 101  |
| chr17 | 76309626 | 76310133 | 508    | 76309980 | 35   |
| chr17 | 76450379 | 76450730 | 352    | 76450530 | 66   |
| chr17 | 76479538 | 76480001 | 464    | 76479694 | 50   |
| chr17 | 76480455 | 76481085 | 631    | 76480728 | 44   |
| chr17 | 76654285 | 76654951 | 667    | 76654655 | 42   |
| chr17 | 76675451 | 76676095 | 645    | 76675752 | 132  |
| chr17 | 76679107 | 76679843 | 737    | 76679486 | 69   |
| chr17 | 76827806 | 76828593 | 788    | 76828240 | 113  |
| chr17 | 77392283 | 77393078 | 796    | 77392669 | 200  |
| chr17 | 77393104 | 77393618 | 515    | 77393268 | 61   |
| chr17 | 77656931 | 77657614 | 684    | 77657270 | 139  |
| chr17 | 77796814 | 77797566 | 753    | 77797142 | 162  |
| chr17 | 77852024 | 77852659 | 636    | 77852286 | 50   |
| chr17 | 77852792 | 77853533 | 742    | 77853170 | 46   |
| chr17 | 77883130 | 77883845 | 716    | 77883528 | 98   |
| chr17 | 77884993 | 77885510 | 518    | 77885174 | 29   |
| chr17 | 77935608 | 77936155 | 548    | 77935944 | 171  |
| chr17 | 78046805 | 78047558 | 754    | 78047207 | 192  |
| chr17 | 78164343 | 78165222 | 880    | 78164897 | 58   |
| chr17 | 78338427 | 78338874 | 448    | 78338744 | 60   |
| chr17 | 78387039 | 78387627 | 589    | 78387419 | 246  |
| chr17 | 78391590 | 78392150 | 561    | 78391779 | 86   |
| chr17 | 78426592 | 78426889 | 298    | 78426737 | 32   |
| chr17 | 78614366 | 78614705 | 340    | 78614537 | 43   |
| chr17 | 78620494 | 78621196 | 703    | 78620850 | 70   |
| chr18 | 586668   | 587281   | 614    | 587014   | 25   |
| chr18 | 648132   | 648475   | 344    | 648291   | 22   |
| chr18 | 801559   | 802148   | 590    | 801905   | 34   |
| chr18 | 3251633  | 3252171  | 539    | 3251825  | 44   |
| chr18 | 3439318  | 3440046  | 729    | 3439645  | 56   |
| chr18 | 3642755  | 3643045  | 291    | 3642899  | 67   |
| chr18 | 7723715  | 7724060  | 346    | 7723828  | 29   |
| chr18 | 8675320  | 8675636  | 317    | 8675462  | 27   |
| chr18 | 9661179  | 9661529  | 351    | 9661375  | 89   |
| chr18 | 10159034 | 10159275 | 242    | 10159155 | 23   |
| chr18 | 10326762 | 10327061 | 300    | 10326922 | 21   |
| chr18 | 10402950 | 10403334 | 385    | 10403124 | 64   |
| chr18 | 10548697 | 10549014 | 318    | 10548849 | 16   |



| Chr   | Start    | End      | Length | Summit   | Tags |
|-------|----------|----------|--------|----------|------|
| chr18 | 10568080 | 10568598 | 519    | 10568231 | 40   |
| chr18 | 11659637 | 11660009 | 373    | 11659819 | 165  |
| chr18 | 11970703 | 11971375 | 673    | 11971041 | 44   |
| chr18 | 12066565 | 12066880 | 316    | 12066687 | 18   |
| chr18 | 12277233 | 12278384 | 1152   | 12277600 | 125  |
| chr18 | 12900854 | 12901386 | 533    | 12901081 | 83   |
| chr18 | 12937595 | 12938732 | 1138   | 12937866 | 139  |
| chr18 | 13716268 | 13716761 | 494    | 13716570 | 59   |
| chr18 | 22382878 | 22384782 | 1905   | 22384468 | 231  |
| chr18 | 22409137 | 22409406 | 270    | 22409276 | 34   |
| chr18 | 26876404 | 26877210 | 807    | 26876916 | 65   |
| chr18 | 27128405 | 27128645 | 241    | 27128525 | 19   |
| chr18 | 27477230 | 27477553 | 324    | 27477354 | 18   |
| chr18 | 32506327 | 32506681 | 355    | 32506491 | 131  |
| chr18 | 32662670 | 32663294 | 625    | 32662992 | 35   |
| chr18 | 41399320 | 41399888 | 569    | 41399660 | 68   |
| chr18 | 41400338 | 41400653 | 316    | 41400493 | 47   |
| chr18 | 43853675 | 43854184 | 510    | 43853900 | 42   |
| chr18 | 44104937 | 44105368 | 432    | 44105201 | 66   |
| chr18 | 44787093 | 44787593 | 501    | 44787402 | 125  |
| chr18 | 50027534 | 50027808 | 275    | 50027665 | 26   |
| chr18 | 50646471 | 50646850 | 380    | 50646636 | 28   |
| chr18 | 54489329 | 54489909 | 581    | 54489530 | 49   |
| chr18 | 54586692 | 54587251 | 560    | 54587067 | 181  |
| chr18 | 54685561 | 54685959 | 399    | 54685793 | 52   |
| chr18 | 55717774 | 55718740 | 967    | 55718035 | 253  |
| chr18 | 55736708 | 55737145 | 438    | 55736838 | 25   |
| chr18 | 58358047 | 58358306 | 260    | 58358177 | 13   |
| chr18 | 58724808 | 58725287 | 480    | 58724939 | 19   |
| chr18 | 59164043 | 59164595 | 553    | 59164426 | 79   |
| chr18 | 59240941 | 59241379 | 439    | 59241227 | 30   |
| chr18 | 59294840 | 59295278 | 439    | 59295032 | 78   |
| chr18 | 69959894 | 69960185 | 292    | 69960055 | 56   |
| chr18 | 71687885 | 71688591 | 707    | 71688242 | 25   |
| chr18 | 72647121 | 72647573 | 453    | 72647413 | 67   |
| chr18 | 72955458 | 72956122 | 665    | 72955855 | 87   |
| chr18 | 74923772 | 74924096 | 325    | 74923947 | 23   |
| chr18 | 75319332 | 75319817 | 486    | 75319500 | 30   |
| chr18 | 75322309 | 75322884 | 576    | 75322601 | 24   |
| chr18 | 75428574 | 75429127 | 554    | 75428896 | 64   |
| chr18 | 75539662 | 75541282 | 1621   | 75540386 | 58   |
| chr18 | 75765515 | 75766183 | 669    | 75765795 | 140  |
| chr18 | 76037904 | 76038626 | 723    | 76038276 | 53   |
| chr18 | 76038993 | 76039652 | 660    | 76039221 | 277  |
| chr18 | 76092847 | 76093185 | 339    | 76092972 | 37   |
| chr18 | 76104902 | 76105708 | 807    | 76105318 | 310  |
| chr19 | 446566   | 446959   | 394    | 446780   | 72   |
| chr19 | 523149   | 523720   | 572    | 523451   | 34   |
| chr19 | 526940   | 527481   | 542    | 527323   | 54   |
| chr19 | 610005   | 610970   | 966    | 610683   | 132  |
| chr19 | 614046   | 614611   | 566    | 614213   | 46   |
| chr19 | 812643   | 813763   | 1121   | 813030   | 111  |
| chr19 | 876830   | 877273   | 444    | 877142   | 22   |

| Chr   | Start    | End      | Length | Summit   | Tags |
|-------|----------|----------|--------|----------|------|
| chr19 | 884222   | 884899   | 678    | 884578   | 57   |
| chr19 | 978554   | 980040   | 1487   | 979273   | 293  |
| chr19 | 990734   | 991237   | 504    | 991111   | 61   |
| chr19 | 1159780  | 1160136  | 357    | 1159952  | 29   |
| chr19 | 1203363  | 1204199  | 837    | 1203767  | 246  |
| chr19 | 1217091  | 1217560  | 470    | 1217222  | 32   |
| chr19 | 1358167  | 1358679  | 513    | 1358504  | 27   |
| chr19 | 1478067  | 1478531  | 465    | 1478254  | 77   |
| chr19 | 1623855  | 1624389  | 535    | 1624081  | 43   |
| chr19 | 1643920  | 1644305  | 386    | 1644121  | 28   |
| chr19 | 1793441  | 1793794  | 354    | 1793559  | 27   |
| chr19 | 1891112  | 1891518  | 407    | 1891357  | 36   |
| chr19 | 2040079  | 2040543  | 465    | 2040302  | 101  |
| chr19 | 2047559  | 2048149  | 591    | 2047916  | 30   |
| chr19 | 2154771  | 2155570  | 800    | 2155200  | 204  |
| chr19 | 2178364  | 2178925  | 562    | 2178583  | 31   |
| chr19 | 2526323  | 2527073  | 751    | 2526541  | 385  |
| chr19 | 2770675  | 2771197  | 523    | 2770823  | 42   |
| chr19 | 2992800  | 2993144  | 345    | 2993020  | 29   |
| chr19 | 3007076  | 3007589  | 514    | 3007213  | 85   |
| chr19 | 3105971  | 3106352  | 382    | 3106158  | 96   |
| chr19 | 3217789  | 3218091  | 303    | 3217960  | 35   |
| chr19 | 3355669  | 3356110  | 442    | 3355794  | 33   |
| chr19 | 3385760  | 3386204  | 445    | 3385901  | 41   |
| chr19 | 3519629  | 3519907  | 279    | 3519760  | 24   |
| chr19 | 4003467  | 4004040  | 574    | 4003683  | 77   |
| chr19 | 4010860  | 4011539  | 680    | 4011153  | 200  |
| chr19 | 4293457  | 4293879  | 423    | 4293749  | 29   |
| chr19 | 4320310  | 4320736  | 427    | 4320453  | 81   |
| chr19 | 4664079  | 4664859  | 781    | 4664491  | 286  |
| chr19 | 4919510  | 4920233  | 724    | 4919708  | 48   |
| chr19 | 5423346  | 5423845  | 500    | 5423520  | 84   |
| chr19 | 5518656  | 5519420  | 765    | 5519044  | 60   |
| chr19 | 5573668  | 5574297  | 630    | 5574006  | 33   |
| chr19 | 5740755  | 5741371  | 617    | 5741033  | 82   |
| chr19 | 5741484  | 5742244  | 761    | 5741706  | 275  |
| chr19 | 5831485  | 5831971  | 487    | 5831665  | 79   |
| chr19 | 5844813  | 5845235  | 423    | 5844978  | 116  |
| chr19 | 5928910  | 5929552  | 643    | 5929269  | 66   |
| chr19 | 6043315  | 6043853  | 539    | 6043584  | 220  |
| chr19 | 6054337  | 6054656  | 320    | 6054461  | 54   |
| chr19 | 7878040  | 7878650  | 611    | 7878286  | 148  |
| chr19 | 7975935  | 7976718  | 784    | 7976336  | 62   |
| chr19 | 8195708  | 8196035  | 328    | 8195884  | 33   |
| chr19 | 8305668  | 8306353  | 686    | 8305990  | 81   |
| chr19 | 8460261  | 8460821  | 561    | 8460599  | 55   |
| chr19 | 8465147  | 8465687  | 541    | 8465441  | 33   |
| chr19 | 8482408  | 8482948  | 541    | 8482776  | 72   |
| chr19 | 9885913  | 9886670  | 758    | 9886270  | 77   |
| chr19 | 10492608 | 10492964 | 357    | 10492783 | 114  |
| chr19 | 10507240 | 10507685 | 446    | 10507519 | 55   |
| chr19 | 10525714 | 10526174 | 461    | 10525992 | 65   |
| chr19 | 10526553 | 10527043 | 491    | 10526722 | 80   |

| Chr   | Start    | End      | Length | Summit   | Tags |
|-------|----------|----------|--------|----------|------|
| chr19 | 11265422 | 11265766 | 345    | 11265604 | 29   |
| chr19 | 11393879 | 11394378 | 500    | 11394146 | 27   |
| chr19 | 11454200 | 11454752 | 553    | 11454514 | 48   |
| chr19 | 11507827 | 11508216 | 390    | 11508058 | 44   |
| chr19 | 12761333 | 12761922 | 590    | 12761541 | 112  |
| chr19 | 12995022 | 12995361 | 340    | 12995195 | 41   |
| chr19 | 13812915 | 13813747 | 833    | 13813173 | 89   |
| chr19 | 13815876 | 13816452 | 577    | 13816249 | 174  |
| chr19 | 14497601 | 14497880 | 280    | 14497726 | 24   |
| chr19 | 15167154 | 15167561 | 408    | 15167431 | 74   |
| chr19 | 16038872 | 16039672 | 801    | 16039252 | 46   |
| chr19 | 16335070 | 16335619 | 550    | 16335248 | 49   |
| chr19 | 16400844 | 16401284 | 441    | 16401020 | 42   |
| chr19 | 17277200 | 17277599 | 400    | 17277326 | 37   |
| chr19 | 17552360 | 17552817 | 458    | 17552505 | 38   |
| chr19 | 17626629 | 17627270 | 642    | 17627023 | 100  |
| chr19 | 18006593 | 18007092 | 500    | 18006967 | 32   |
| chr19 | 18129362 | 18129798 | 437    | 18129636 | 156  |
| chr19 | 18196282 | 18196802 | 521    | 18196471 | 275  |
| chr19 | 18263761 | 18264482 | 722    | 18264332 | 36   |
| chr19 | 18336621 | 18337043 | 423    | 18336777 | 135  |
| chr19 | 18345630 | 18346464 | 835    | 18345770 | 40   |
| chr19 | 18410364 | 18411059 | 696    | 18410672 | 87   |
| chr19 | 18643337 | 18644028 | 692    | 18643674 | 31   |
| chr19 | 18735505 | 18736186 | 682    | 18735914 | 156  |
| chr19 | 18744327 | 18744915 | 589    | 18744641 | 51   |
| chr19 | 18911808 | 18912390 | 583    | 18912095 | 178  |
| chr19 | 19307629 | 19307962 | 334    | 19307831 | 25   |
| chr19 | 19401031 | 19401652 | 622    | 19401440 | 43   |
| chr19 | 19458931 | 19459409 | 479    | 19459190 | 57   |
| chr19 | 19748277 | 19748693 | 417    | 19748473 | 237  |
| chr19 | 20995254 | 20995797 | 544    | 20995643 | 83   |
| chr19 | 21303495 | 21303817 | 323    | 21303636 | 47   |
| chr19 | 37763609 | 37764114 | 506    | 37763739 | 51   |
| chr19 | 37958650 | 37958942 | 293    | 37958813 | 17   |
| chr19 | 38456212 | 38456728 | 517    | 38456368 | 42   |
| chr19 | 38481066 | 38481723 | 658    | 38481451 | 228  |
| chr19 | 39002547 | 39003557 | 1011   | 39002923 | 194  |
| chr19 | 39664063 | 39665030 | 968    | 39664706 | 41   |
| chr19 | 40795238 | 40795673 | 436    | 40795406 | 55   |
| chr19 | 41332606 | 41333135 | 530    | 41332952 | 75   |
| chr19 | 42261018 | 42261603 | 586    | 42261380 | 41   |
| chr19 | 42777156 | 42777923 | 768    | 42777570 | 39   |
| chr19 | 43020064 | 43020811 | 748    | 43020443 | 37   |
| chr19 | 43148665 | 43148985 | 321    | 43148790 | 43   |
| chr19 | 43162256 | 43162631 | 376    | 43162457 | 234  |
| chr19 | 43344667 | 43345020 | 354    | 43344806 | 87   |
| chr19 | 43355413 | 43356229 | 817    | 43355781 | 77   |
| chr19 | 43556979 | 43557522 | 544    | 43557177 | 80   |
| chr19 | 43586038 | 43586612 | 575    | 43586277 | 30   |
| chr19 | 43881367 | 43882084 | 718    | 43881701 | 243  |
| chr19 | 43974643 | 43974940 | 298    | 43974770 | 27   |
| chr19 | 44584810 | 44585366 | 557    | 44585060 | 35   |

| Chr   | Start    | End      | Length | Summit   | Tags |
|-------|----------|----------|--------|----------|------|
| chr19 | 45808812 | 45809131 | 320    | 45808943 | 45   |
| chr19 | 45916649 | 45917238 | 590    | 45916973 | 242  |
| chr19 | 46416168 | 46416702 | 535    | 46416443 | 305  |
| chr19 | 46549002 | 46549465 | 464    | 46549203 | 73   |
| chr19 | 46625134 | 46625704 | 571    | 46625299 | 128  |
| chr19 | 47056045 | 47056652 | 608    | 47056329 | 219  |
| chr19 | 47115788 | 47116558 | 771    | 47116189 | 61   |
| chr19 | 47287487 | 47288189 | 703    | 47287825 | 35   |
| chr19 | 47325576 | 47326140 | 565    | 47325920 | 34   |
| chr19 | 47395348 | 47396069 | 722    | 47395734 | 209  |
| chr19 | 47412594 | 47413085 | 492    | 47412727 | 32   |
| chr19 | 47449136 | 47450233 | 1098   | 47449906 | 96   |
| chr19 | 47466621 | 47467281 | 661    | 47466919 | 216  |
| chr19 | 47473923 | 47474331 | 409    | 47474111 | 241  |
| chr19 | 47477023 | 47477578 | 556    | 47477357 | 158  |
| chr19 | 48552695 | 48553070 | 376    | 48552883 | 33   |
| chr19 | 48573684 | 48574016 | 333    | 48573871 | 38   |
| chr19 | 48772492 | 48772898 | 407    | 48772733 | 100  |
| chr19 | 48802915 | 48803241 | 327    | 48803089 | 63   |
| chr19 | 50005352 | 50005721 | 370    | 50005534 | 64   |
| chr19 | 50445969 | 50446595 | 627    | 50446258 | 258  |
| chr19 | 50595333 | 50595707 | 375    | 50595535 | 170  |
| chr19 | 50597360 | 50597867 | 508    | 50597670 | 212  |
| chr19 | 50641913 | 50642418 | 506    | 50642236 | 203  |
| chr19 | 50827370 | 50828094 | 725    | 50827731 | 96   |
| chr19 | 50947816 | 50948208 | 393    | 50947939 | 27   |
| chr19 | 51080344 | 51081355 | 1012   | 51081089 | 150  |
| chr19 | 51568821 | 51569629 | 809    | 51569251 | 127  |
| chr19 | 51608269 | 51608827 | 559    | 51608635 | 39   |
| chr19 | 51979673 | 51980123 | 451    | 51979947 | 250  |
| chr19 | 52425332 | 52426732 | 1401   | 52426439 | 356  |
| chr19 | 52427302 | 52427780 | 479    | 52427651 | 44   |
| chr19 | 52795315 | 52795818 | 504    | 52795674 | 19   |
| chr19 | 52818916 | 52819416 | 501    | 52819160 | 69   |
| chr19 | 52913877 | 52914653 | 777    | 52914239 | 248  |
| chr19 | 52920923 | 52921407 | 485    | 52921233 | 248  |
| chr19 | 52940674 | 52941069 | 396    | 52940897 | 46   |
| chr19 | 53248967 | 53249237 | 271    | 53249109 | 15   |
| chr19 | 53947567 | 53948364 | 798    | 53947712 | 119  |
| chr19 | 54149859 | 54150475 | 617    | 54150295 | 148  |
| chr19 | 54250981 | 54251674 | 694    | 54251354 | 65   |
| chr19 | 54259120 | 54259673 | 554    | 54259313 | 164  |
| chr19 | 54663311 | 54663819 | 509    | 54663471 | 64   |
| chr19 | 54961725 | 54962392 | 668    | 54962037 | 35   |
| chr19 | 56921064 | 56921471 | 408    | 56921204 | 44   |
| chr19 | 57334900 | 57335269 | 370    | 57335069 | 78   |
| chr19 | 57366437 | 57366882 | 446    | 57366601 | 22   |
| chr19 | 60392361 | 60392999 | 639    | 60392736 | 65   |
| chr19 | 60507499 | 60507841 | 343    | 60507654 | 38   |
| chr19 | 60547730 | 60548074 | 345    | 60547882 | 39   |
| chr19 | 60572390 | 60572814 | 425    | 60572568 | 60   |
| chr19 | 60846291 | 60847105 | 815    | 60846693 | 126  |
| chr19 | 61420245 | 61421169 | 925    | 61420569 | 116  |

| Chr   | Start    | End      | Length | Summit   | Tags |
|-------|----------|----------|--------|----------|------|
| chr19 | 61498668 | 61499136 | 469    | 61498893 | 140  |
| chr19 | 62972690 | 62973201 | 512    | 62972820 | 28   |
| chr2  | 27950    | 28456    | 507    | 28305    | 39   |
| chr2  | 626742   | 627190   | 449    | 627037   | 25   |
| chr2  | 1687771  | 1688371  | 601    | 1687947  | 253  |
| chr2  | 2721884  | 2722504  | 621    | 2722342  | 175  |
| chr2  | 2730701  | 2731234  | 534    | 2730831  | 44   |
| chr2  | 2746351  | 2746813  | 463    | 2746532  | 66   |
| chr2  | 2827909  | 2828388  | 480    | 2828232  | 47   |
| chr2  | 3559932  | 3560207  | 276    | 3560051  | 28   |
| chr2  | 3583559  | 3584242  | 684    | 3583929  | 308  |
| chr2  | 8736118  | 8736682  | 565    | 8736423  | 27   |
| chr2  | 9263943  | 9264462  | 520    | 9264218  | 28   |
| chr2  | 9307111  | 9307501  | 391    | 9307312  | 72   |
| chr2  | 9613291  | 9613875  | 585    | 9613551  | 34   |
| chr2  | 9687702  | 9688423  | 722    | 9688086  | 41   |
| chr2  | 9858598  | 9859182  | 585    | 9858877  | 126  |
| chr2  | 10266369 | 10266807 | 439    | 10266503 | 32   |
| chr2  | 10551194 | 10551704 | 511    | 10551364 | 58   |
| chr2  | 10555333 | 10555951 | 619    | 10555545 | 96   |
| chr2  | 11212510 | 11213083 | 574    | 11212836 | 38   |
| chr2  | 11995856 | 11996150 | 295    | 11995993 | 110  |
| chr2  | 14592685 | 14592998 | 314    | 14592849 | 35   |
| chr2  | 17585200 | 17585583 | 384    | 17585463 | 23   |
| chr2  | 18605052 | 18605628 | 577    | 18605455 | 77   |
| chr2  | 19136755 | 19137158 | 404    | 19136955 | 125  |
| chr2  | 20129391 | 20129821 | 431    | 20129629 | 32   |
| chr2  | 20199350 | 20199670 | 321    | 20199540 | 34   |
| chr2  | 20235505 | 20235879 | 375    | 20235721 | 144  |
| chr2  | 20242867 | 20243446 | 580    | 20243093 | 215  |
| chr2  | 20275546 | 20276131 | 586    | 20275914 | 185  |
| chr2  | 20276245 | 20276611 | 367    | 20276452 | 169  |
| chr2  | 20280812 | 20281189 | 378    | 20281034 | 37   |
| chr2  | 20287178 | 20287682 | 505    | 20287549 | 26   |
| chr2  | 20573330 | 20573912 | 583    | 20573718 | 27   |
| chr2  | 21438505 | 21438805 | 301    | 21438684 | 53   |
| chr2  | 23477871 | 23478305 | 435    | 23478002 | 49   |
| chr2  | 24160344 | 24161218 | 875    | 24160765 | 337  |
| chr2  | 24252078 | 24252349 | 272    | 24252206 | 19   |
| chr2  | 25327903 | 25328631 | 729    | 25328278 | 51   |
| chr2  | 25453550 | 25454070 | 521    | 25453761 | 91   |
| chr2  | 26085296 | 26085644 | 349    | 26085438 | 30   |
| chr2  | 26388730 | 26389288 | 559    | 26389078 | 121  |
| chr2  | 27147829 | 27148437 | 609    | 27148069 | 63   |
| chr2  | 27157625 | 27157970 | 346    | 27157782 | 80   |
| chr2  | 27456910 | 27457583 | 674    | 27457337 | 129  |
| chr2  | 28454539 | 28455192 | 654    | 28454887 | 46   |
| chr2  | 28485419 | 28485759 | 341    | 28485622 | 65   |
| chr2  | 28512873 | 28513595 | 723    | 28513164 | 165  |
| chr2  | 28530124 | 28530752 | 629    | 28530504 | 98   |
| chr2  | 29143405 | 29143667 | 263    | 29143536 | 41   |
| chr2  | 29144900 | 29145343 | 444    | 29145069 | 71   |
| chr2  | 30042630 | 30043081 | 452    | 30042814 | 114  |

| Chr  | Start    | End      | Length | Summit   | Tags |
|------|----------|----------|--------|----------|------|
| chr2 | 30307809 | 30308299 | 491    | 30308082 | 33   |
| chr2 | 31330525 | 31330948 | 424    | 31330752 | 38   |
| chr2 | 31455469 | 31455841 | 373    | 31455633 | 44   |
| chr2 | 37277240 | 37277817 | 578    | 37277382 | 87   |
| chr2 | 37442134 | 37442401 | 268    | 37442275 | 20   |
| chr2 | 37867578 | 37867847 | 270    | 37867722 | 30   |
| chr2 | 39178142 | 39178509 | 368    | 39178346 | 27   |
| chr2 | 42452907 | 42453232 | 326    | 42453055 | 81   |
| chr2 | 42934806 | 42935300 | 495    | 42935059 | 88   |
| chr2 | 42937749 | 42938293 | 545    | 42938097 | 32   |
| chr2 | 43017698 | 43018156 | 459    | 43017950 | 45   |
| chr2 | 43249640 | 43250171 | 532    | 43249819 | 35   |
| chr2 | 45991342 | 45991696 | 355    | 45991529 | 42   |
| chr2 | 46251564 | 46252347 | 784    | 46251813 | 181  |
| chr2 | 46252728 | 46253491 | 764    | 46253132 | 241  |
| chr2 | 46413376 | 46413748 | 373    | 46413583 | 25   |
| chr2 | 46779616 | 46780171 | 556    | 46779795 | 45   |
| chr2 | 48393242 | 48393578 | 337    | 48393449 | 21   |
| chr2 | 55130808 | 55131468 | 661    | 55131148 | 45   |
| chr2 | 60580504 | 60581158 | 655    | 60580775 | 87   |
| chr2 | 60681898 | 60682265 | 368    | 60682008 | 38   |
| chr2 | 61510665 | 61511065 | 401    | 61510920 | 31   |
| chr2 | 64391797 | 64392272 | 476    | 64391919 | 42   |
| chr2 | 64534511 | 64535076 | 566    | 64534786 | 39   |
| chr2 | 64723760 | 64724187 | 428    | 64724057 | 25   |
| chr2 | 64831258 | 64831739 | 482    | 64831475 | 38   |
| chr2 | 64929151 | 64929430 | 280    | 64929303 | 28   |
| chr2 | 65149351 | 65149781 | 431    | 65149579 | 71   |
| chr2 | 65396537 | 65397088 | 552    | 65396916 | 95   |
| chr2 | 65511574 | 65512183 | 610    | 65511861 | 31   |
| chr2 | 65517103 | 65517434 | 332    | 65517272 | 71   |
| chr2 | 69599363 | 69599817 | 455    | 69599651 | 68   |
| chr2 | 69910086 | 69910586 | 501    | 69910213 | 31   |
| chr2 | 70026096 | 70026584 | 489    | 70026307 | 32   |
| chr2 | 70222966 | 70223665 | 700    | 70223294 | 63   |
| chr2 | 70604778 | 70605319 | 542    | 70605127 | 30   |
| chr2 | 71584522 | 71584864 | 343    | 71584697 | 107  |
| chr2 | 71617025 | 71617397 | 373    | 71617178 | 68   |
| chr2 | 72122206 | 72122600 | 395    | 72122380 | 117  |
| chr2 | 72195943 | 72196546 | 604    | 72196158 | 129  |
| chr2 | 72974615 | 72974985 | 371    | 72974849 | 69   |
| chr2 | 73015384 | 73015693 | 310    | 73015511 | 48   |
| chr2 | 74006622 | 74006901 | 280    | 74006773 | 26   |
| chr2 | 74064251 | 74064622 | 372    | 74064444 | 99   |
| chr2 | 74090675 | 74091232 | 558    | 74091043 | 45   |
| chr2 | 74268814 | 74269294 | 481    | 74269106 | 209  |
| chr2 | 74505997 | 74506356 | 360    | 74506195 | 44   |
| chr2 | 80629103 | 80629459 | 357    | 80629292 | 43   |
| chr2 | 83931732 | 83932053 | 322    | 83931905 | 111  |
| chr2 | 85006002 | 85006373 | 372    | 85006167 | 71   |
| chr2 | 85213601 | 85214289 | 689    | 85213942 | 63   |
| chr2 | 85318373 | 85318959 | 587    | 85318615 | 113  |
| chr2 | 85491473 | 85491724 | 252    | 85491599 | 20   |

| Chr  | Start     | End       | Length | Summit    | Tags |
|------|-----------|-----------|--------|-----------|------|
| chr2 | 85822483  | 85822952  | 470    | 85822712  | 67   |
| chr2 | 86115968  | 86116342  | 375    | 86116205  | 58   |
| chr2 | 87701768  | 87702075  | 308    | 87701951  | 37   |
| chr2 | 88272121  | 88272534  | 414    | 88272368  | 32   |
| chr2 | 88280410  | 88280871  | 462    | 88280742  | 61   |
| chr2 | 95236705  | 95237235  | 531    | 95236884  | 109  |
| chr2 | 95289367  | 95289829  | 463    | 95289660  | 52   |
| chr2 | 95304061  | 95304695  | 635    | 95304401  | 31   |
| chr2 | 95345642  | 95346095  | 454    | 95345816  | 105  |
| chr2 | 96129651  | 96130045  | 395    | 96129866  | 127  |
| chr2 | 96727471  | 96728203  | 733    | 96727846  | 59   |
| chr2 | 96957308  | 96957679  | 372    | 96957465  | 117  |
| chr2 | 98145542  | 98146123  | 582    | 98145712  | 104  |
| chr2 | 98433969  | 98434253  | 285    | 98434094  | 44   |
| chr2 | 100545380 | 100545984 | 605    | 100545599 | 94   |
| chr2 | 102786555 | 102787004 | 450    | 102786800 | 122  |
| chr2 | 105387120 | 105387432 | 313    | 105387301 | 31   |
| chr2 | 105392563 | 105392961 | 399    | 105392830 | 59   |
| chr2 | 108916288 | 108916806 | 519    | 108916641 | 49   |
| chr2 | 108984147 | 108984462 | 316    | 108984274 | 19   |
| chr2 | 110013752 | 110014095 | 344    | 110013973 | 15   |
| chr2 | 110664364 | 110664733 | 370    | 110664516 | 28   |
| chr2 | 111594491 | 111595305 | 815    | 111594819 | 184  |
| chr2 | 111709997 | 111710471 | 475    | 111710341 | 37   |
| chr2 | 111803419 | 111803744 | 326    | 111803560 | 23   |
| chr2 | 113119238 | 113119794 | 557    | 113119474 | 46   |
| chr2 | 113166578 | 113166982 | 405    | 113166796 | 55   |
| chr2 | 113279629 | 113280034 | 406    | 113279855 | 111  |
| chr2 | 113351304 | 113351690 | 387    | 113351494 | 66   |
| chr2 | 113638657 | 113638991 | 335    | 113638838 | 50   |
| chr2 | 119321806 | 119322106 | 301    | 119321930 | 17   |
| chr2 | 120696698 | 120697584 | 887    | 120697071 | 65   |
| chr2 | 121322016 | 121322481 | 466    | 121322162 | 56   |
| chr2 | 122362096 | 122362505 | 410    | 122362374 | 27   |
| chr2 | 128181857 | 128182237 | 381    | 128182090 | 19   |
| chr2 | 128333697 | 128334096 | 400    | 128333931 | 47   |
| chr2 | 128779269 | 128780175 | 907    | 128779456 | 247  |
| chr2 | 131194148 | 131194412 | 265    | 131194276 | 18   |
| chr2 | 131351425 | 131351702 | 278    | 131351566 | 60   |
| chr2 | 131356033 | 131356524 | 492    | 131356342 | 58   |
| chr2 | 131385981 | 131386443 | 463    | 131386203 | 45   |
| chr2 | 132009959 | 132010555 | 597    | 132010194 | 60   |
| chr2 | 134605783 | 134606078 | 296    | 134605932 | 68   |
| chr2 | 136271944 | 136272203 | 260    | 136272074 | 46   |
| chr2 | 144411159 | 144411684 | 526    | 144411509 | 25   |
| chr2 | 147856444 | 147856701 | 258    | 147856573 | 21   |
| chr2 | 151049958 | 151050667 | 710    | 151050250 | 181  |
| chr2 | 152765392 | 152765684 | 293    | 152765526 | 46   |
| chr2 | 156819399 | 156820069 | 671    | 156819734 | 38   |
| chr2 | 159021764 | 159022514 | 751    | 159022152 | 98   |
| chr2 | 159457891 | 159458368 | 478    | 159458052 | 185  |
| chr2 | 159533369 | 159534044 | 676    | 159533745 | 63   |
| chr2 | 159689333 | 159689703 | 371    | 159689591 | 27   |

| Chr  | Start     | End       | Length | Summit    | Tags |
|------|-----------|-----------|--------|-----------|------|
| chr2 | 159721564 | 159722123 | 560    | 159721755 | 37   |
| chr2 | 165406231 | 165406827 | 597    | 165406606 | 49   |
| chr2 | 169179261 | 169179705 | 445    | 169179521 | 37   |
| chr2 | 170149310 | 170149682 | 373    | 170149535 | 27   |
| chr2 | 171998632 | 171999149 | 518    | 171998922 | 112  |
| chr2 | 172669948 | 172670504 | 557    | 172670326 | 45   |
| chr2 | 172769838 | 172770261 | 424    | 172770095 | 40   |
| chr2 | 174536542 | 174537361 | 820    | 174536978 | 42   |
| chr2 | 174596887 | 174597228 | 342    | 174597072 | 62   |
| chr2 | 175577815 | 175578289 | 475    | 175578158 | 28   |
| chr2 | 176679531 | 176679980 | 450    | 176679706 | 41   |
| chr2 | 176751159 | 176751665 | 507    | 176751478 | 34   |
| chr2 | 177743152 | 177743541 | 390    | 177743355 | 46   |
| chr2 | 186141004 | 186141260 | 257    | 186141132 | 16   |
| chr2 | 187162902 | 187163392 | 491    | 187163208 | 59   |
| chr2 | 191878306 | 191878538 | 233    | 191878422 | 21   |
| chr2 | 198072338 | 198073625 | 1288   | 198073438 | 140  |
| chr2 | 198164516 | 198165093 | 578    | 198164835 | 24   |
| chr2 | 200879853 | 200880512 | 660    | 200880202 | 34   |
| chr2 | 201056670 | 201057091 | 422    | 201056831 | 48   |
| chr2 | 201082785 | 201083309 | 525    | 201083155 | 31   |
| chr2 | 201098887 | 201099353 | 467    | 201099018 | 31   |
| chr2 | 201691430 | 201691991 | 562    | 201691809 | 138  |
| chr2 | 202215513 | 202216701 | 1189   | 202215754 | 259  |
| chr2 | 206260366 | 206260655 | 290    | 206260518 | 63   |
| chr2 | 206538670 | 206539111 | 442    | 206538920 | 62   |
| chr2 | 213509629 | 213510107 | 479    | 213509756 | 36   |
| chr2 | 217124745 | 217125030 | 286    | 217124872 | 22   |
| chr2 | 217232094 | 217232677 | 584    | 217232483 | 79   |
| chr2 | 217297241 | 217297591 | 351    | 217297394 | 121  |
| chr2 | 218604648 | 218605169 | 522    | 218604947 | 77   |
| chr2 | 218871067 | 218871343 | 277    | 218871185 | 27   |
| chr2 | 219456363 | 219456983 | 621    | 219456598 | 284  |
| chr2 | 219790933 | 219791641 | 709    | 219791279 | 64   |
| chr2 | 219847291 | 219847614 | 324    | 219847479 | 35   |
| chr2 | 219859299 | 219859841 | 543    | 219859601 | 138  |
| chr2 | 220257636 | 220257914 | 279    | 220257784 | 26   |
| chr2 | 224985113 | 224985389 | 277    | 224985242 | 22   |
| chr2 | 226004907 | 226005135 | 229    | 226005021 | 15   |
| chr2 | 230792904 | 230793208 | 305    | 230793063 | 78   |
| chr2 | 231349593 | 231349972 | 380    | 231349722 | 24   |
| chr2 | 232253029 | 232253699 | 671    | 232253356 | 202  |
| chr2 | 232274626 | 232275199 | 574    | 232275019 | 154  |
| chr2 | 232283085 | 232283644 | 560    | 232283304 | 116  |
| chr2 | 232895286 | 232895748 | 463    | 232895595 | 37   |
| chr2 | 233449141 | 233449890 | 750    | 233449525 | 83   |
| chr2 | 233786480 | 233786865 | 386    | 233786647 | 132  |
| chr2 | 233958052 | 233958406 | 355    | 233958248 | 48   |
| chr2 | 234264730 | 234265168 | 439    | 234264874 | 69   |
| chr2 | 234404303 | 234404833 | 531    | 234404496 | 42   |
| chr2 | 235019930 | 235020675 | 746    | 235020317 | 129  |
| chr2 | 235070048 | 235070606 | 559    | 235070245 | 35   |
| chr2 | 235600145 | 235600599 | 455    | 235600321 | 96   |



| Chr   | Start     | End       | Length | Summit    | Tags |
|-------|-----------|-----------|--------|-----------|------|
| chr2  | 235898531 | 235898888 | 358    | 235898720 | 59   |
| chr2  | 236744772 | 236745201 | 430    | 236744917 | 111  |
| chr2  | 237062174 | 237062998 | 825    | 237062728 | 379  |
| chr2  | 237265093 | 237265611 | 519    | 237265426 | 171  |
| chr2  | 237343328 | 237344130 | 803    | 237343966 | 117  |
| chr2  | 238469448 | 238469877 | 430    | 238469616 | 32   |
| chr2  | 238509258 | 238509554 | 297    | 238509424 | 29   |
| chr2  | 238715759 | 238716399 | 641    | 238716112 | 77   |
| chr2  | 238893553 | 238894324 | 772    | 238893926 | 56   |
| chr2  | 239026302 | 239026809 | 508    | 239026577 | 397  |
| chr2  | 239877710 | 239878223 | 514    | 239877916 | 37   |
| chr2  | 239936425 | 239936783 | 359    | 239936599 | 36   |
| chr2  | 240253303 | 240253701 | 399    | 240253548 | 33   |
| chr2  | 240364807 | 240365502 | 696    | 240365083 | 48   |
| chr2  | 240793400 | 240793810 | 411    | 240793652 | 69   |
| chr2  | 240912228 | 240912745 | 518    | 240912547 | 83   |
| chr2  | 240958074 | 240958908 | 835    | 240958554 | 80   |
| chr2  | 241021958 | 241022524 | 567    | 241022164 | 126  |
| chr2  | 241029456 | 241030200 | 745    | 241029802 | 163  |
| chr2  | 241038120 | 241038788 | 669    | 241038400 | 64   |
| chr2  | 241484920 | 241485445 | 526    | 241485068 | 71   |
| chr2  | 241860674 | 241861138 | 465    | 241860982 | 20   |
| chr2  | 242096474 | 242096991 | 518    | 242096797 | 30   |
| chr2  | 242486292 | 242486945 | 654    | 242486682 | 174  |
| chr2  | 242492275 | 242492634 | 360    | 242492456 | 83   |
| chr20 | 226966    | 227601    | 636    | 227353    | 57   |
| chr20 | 772568    | 772934    | 367    | 772724    | 80   |
| chr20 | 1840719   | 1841057   | 339    | 1840881   | 50   |
| chr20 | 2727019   | 2727501   | 483    | 2727347   | 43   |
| chr20 | 3164228   | 3164922   | 695    | 3164754   | 85   |
| chr20 | 3673488   | 3674042   | 555    | 3673811   | 54   |
| chr20 | 3696172   | 3696987   | 816    | 3696572   | 145  |
| chr20 | 4595594   | 4595983   | 390    | 4595770   | 54   |
| chr20 | 4614774   | 4615286   | 513    | 4614940   | 37   |
| chr20 | 5048405   | 5048979   | 575    | 5048818   | 186  |
| chr20 | 6051427   | 6052050   | 624    | 6051717   | 98   |
| chr20 | 10486433  | 10486755  | 323    | 10486583  | 135  |
| chr20 | 10930607  | 10930885  | 279    | 10930723  | 22   |
| chr20 | 12734949  | 12735607  | 659    | 12735219  | 28   |
| chr20 | 13729393  | 13729738  | 346    | 13729545  | 57   |
| chr20 | 17540351  | 17541095  | 745    | 17540740  | 63   |
| chr20 | 17778771  | 17779201  | 431    | 17778982  | 91   |
| chr20 | 17930068  | 17930460  | 393    | 17930295  | 41   |
| chr20 | 19886948  | 19887374  | 427    | 19887094  | 78   |
| chr20 | 21434827  | 21435184  | 358    | 21435056  | 27   |
| chr20 | 22691060  | 22691722  | 663    | 22691368  | 122  |
| chr20 | 23354818  | 23355534  | 717    | 23355200  | 30   |
| chr20 | 24951314  | 24951868  | 555    | 24951571  | 30   |
| chr20 | 25624588  | 25625090  | 503    | 25624752  | 51   |
| chr20 | 29624283  | 29624894  | 612    | 29624675  | 74   |
| chr20 | 30871250  | 30871885  | 636    | 30871576  | 66   |
| chr20 | 32163505  | 32164021  | 517    | 32163853  | 72   |
| chr20 | 32354151  | 32355088  | 938    | 32354500  | 119  |

| Chr   | Start    | End      | Length | Summit   | Tags |
|-------|----------|----------|--------|----------|------|
| chr20 | 33223155 | 33223583 | 429    | 33223361 | 45   |
| chr20 | 33226304 | 33226731 | 428    | 33226523 | 63   |
| chr20 | 33359327 | 33359796 | 470    | 33359584 | 105  |
| chr20 | 33463155 | 33463509 | 355    | 33463329 | 188  |
| chr20 | 33677886 | 33678239 | 354    | 33678115 | 28   |
| chr20 | 34470139 | 34470677 | 539    | 34470298 | 69   |
| chr20 | 34897017 | 34897586 | 570    | 34897347 | 36   |
| chr20 | 34923574 | 34924185 | 612    | 34924002 | 141  |
| chr20 | 35393787 | 35394479 | 693    | 35394133 | 114  |
| chr20 | 35420436 | 35420934 | 499    | 35420728 | 255  |
| chr20 | 35456539 | 35457300 | 762    | 35456875 | 310  |
| chr20 | 35476271 | 35476594 | 324    | 35476401 | 30   |
| chr20 | 35588134 | 35588442 | 309    | 35588300 | 25   |
| chr20 | 36663651 | 36664164 | 514    | 36663815 | 29   |
| chr20 | 38349153 | 38349592 | 440    | 38349322 | 75   |
| chr20 | 38726340 | 38726810 | 471    | 38726467 | 28   |
| chr20 | 38779344 | 38779709 | 366    | 38779544 | 53   |
| chr20 | 39195763 | 39196323 | 561    | 39196117 | 111  |
| chr20 | 43401067 | 43401523 | 457    | 43401372 | 67   |
| chr20 | 44202029 | 44202275 | 247    | 44202152 | 37   |
| chr20 | 44231301 | 44231714 | 414    | 44231481 | 84   |
| chr20 | 45188020 | 45188338 | 319    | 45188151 | 64   |
| chr20 | 45727392 | 45728270 | 879    | 45727569 | 227  |
| chr20 | 45898234 | 45898554 | 321    | 45898360 | 31   |
| chr20 | 45955099 | 45955410 | 312    | 45955228 | 51   |
| chr20 | 45970815 | 45971195 | 381    | 45970992 | 48   |
| chr20 | 46190113 | 46190414 | 302    | 46190240 | 33   |
| chr20 | 46567956 | 46568209 | 254    | 46568083 | 36   |
| chr20 | 46878220 | 46878524 | 305    | 46878351 | 41   |
| chr20 | 47431330 | 47431938 | 609    | 47431713 | 88   |
| chr20 | 47557665 | 47558010 | 346    | 47557826 | 90   |
| chr20 | 47904092 | 47904498 | 407    | 47904361 | 30   |
| chr20 | 48216092 | 48216394 | 303    | 48216223 | 51   |
| chr20 | 48480574 | 48480947 | 374    | 48480775 | 110  |
| chr20 | 48488946 | 48489623 | 678    | 48489269 | 56   |
| chr20 | 48894519 | 48895004 | 486    | 48894727 | 329  |
| chr20 | 48915356 | 48916078 | 723    | 48915740 | 46   |
| chr20 | 48981594 | 48981955 | 362    | 48981725 | 33   |
| chr20 | 51642395 | 51642802 | 408    | 51642610 | 159  |
| chr20 | 51807331 | 51807872 | 542    | 51807663 | 60   |
| chr20 | 52173640 | 52173951 | 312    | 52173770 | 38   |
| chr20 | 52234874 | 52235160 | 287    | 52235031 | 77   |
| chr20 | 54368147 | 54368534 | 388    | 54368312 | 142  |
| chr20 | 54817008 | 54817580 | 573    | 54817403 | 118  |
| chr20 | 54835753 | 54836092 | 340    | 54835926 | 46   |
| chr20 | 55187645 | 55188180 | 536    | 55187833 | 133  |
| chr20 | 55271733 | 55272142 | 410    | 55271907 | 54   |
| chr20 | 55335072 | 55335515 | 444    | 55335348 | 31   |
| chr20 | 55397574 | 55398123 | 550    | 55397862 | 71   |
| chr20 | 55444064 | 55444508 | 445    | 55444337 | 93   |
| chr20 | 55665772 | 55666463 | 692    | 55666179 | 57   |
| chr20 | 55757177 | 55757531 | 355    | 55757366 | 27   |
| chr20 | 55875636 | 55875960 | 325    | 55875836 | 52   |

| Chr   | Start    | End      | Length | Summit   | Tags |
|-------|----------|----------|--------|----------|------|
| chr20 | 57368032 | 57368386 | 355    | 57368150 | 19   |
| chr20 | 59396148 | 59396426 | 279    | 59396302 | 49   |
| chr20 | 59637124 | 59637754 | 631    | 59637509 | 54   |
| chr20 | 59692139 | 59692496 | 358    | 59692320 | 71   |
| chr20 | 59797808 | 59798304 | 497    | 59798122 | 119  |
| chr20 | 59821251 | 59821610 | 360    | 59821439 | 88   |
| chr20 | 60249690 | 60250267 | 578    | 60250017 | 62   |
| chr20 | 60325201 | 60325942 | 742    | 60325588 | 74   |
| chr20 | 60358232 | 60358955 | 724    | 60358614 | 268  |
| chr20 | 60374683 | 60375746 | 1064   | 60375013 | 120  |
| chr20 | 60386375 | 60387108 | 734    | 60386731 | 157  |
| chr20 | 60612271 | 60612877 | 607    | 60612664 | 195  |
| chr20 | 60753586 | 60754260 | 675    | 60753914 | 36   |
| chr20 | 60839796 | 60840682 | 887    | 60839960 | 90   |
| chr20 | 60855949 | 60856474 | 526    | 60856115 | 52   |
| chr20 | 61357801 | 61358361 | 561    | 61357961 | 77   |
| chr20 | 61635627 | 61636409 | 783    | 61636018 | 54   |
| chr20 | 61739227 | 61739652 | 426    | 61739365 | 32   |
| chr20 | 61796619 | 61797258 | 640    | 61796923 | 61   |
| chr20 | 61842760 | 61843287 | 528    | 61843078 | 74   |
| chr20 | 61975477 | 61975861 | 385    | 61975664 | 38   |
| chr21 | 26212710 | 26213368 | 659    | 26212998 | 30   |
| chr21 | 28690702 | 28691022 | 321    | 28690857 | 58   |
| chr21 | 29179205 | 29179634 | 430    | 29179451 | 38   |
| chr21 | 33722940 | 33723287 | 348    | 33723100 | 91   |
| chr21 | 34876593 | 34877005 | 413    | 34876804 | 81   |
| chr21 | 35107679 | 35107966 | 288    | 35107832 | 57   |
| chr21 | 36317741 | 36318022 | 282    | 36317862 | 28   |
| chr21 | 36429459 | 36430019 | 561    | 36429894 | 32   |
| chr21 | 36614786 | 36615121 | 336    | 36614951 | 161  |
| chr21 | 37643810 | 37644134 | 325    | 37643966 | 23   |
| chr21 | 37941961 | 37942401 | 441    | 37942169 | 28   |
| chr21 | 38043404 | 38043738 | 335    | 38043545 | 29   |
| chr21 | 39197486 | 39197987 | 502    | 39197819 | 121  |
| chr21 | 39315043 | 39315579 | 537    | 39315238 | 37   |
| chr21 | 39642408 | 39643081 | 674    | 39642840 | 26   |
| chr21 | 40990063 | 40990368 | 306    | 40990222 | 27   |
| chr21 | 41465141 | 41465394 | 254    | 41465268 | 26   |
| chr21 | 41961680 | 41962348 | 669    | 41962054 | 49   |
| chr21 | 41971496 | 41971774 | 279    | 41971626 | 35   |
| chr21 | 42020427 | 42021040 | 614    | 42020861 | 185  |
| chr21 | 42071121 | 42071464 | 344    | 42071265 | 33   |
| chr21 | 42076515 | 42076945 | 431    | 42076769 | 28   |
| chr21 | 42172133 | 42172760 | 628    | 42172538 | 60   |
| chr21 | 42222453 | 42222903 | 451    | 42222601 | 23   |
| chr21 | 42224226 | 42224494 | 269    | 42224369 | 17   |
| chr21 | 42252425 | 42252779 | 355    | 42252612 | 129  |
| chr21 | 42371909 | 42372473 | 565    | 42372192 | 50   |
| chr21 | 42908073 | 42908558 | 486    | 42908383 | 30   |
| chr21 | 43248835 | 43249124 | 290    | 43248966 | 53   |
| chr21 | 43352517 | 43352915 | 399    | 43352667 | 48   |
| chr21 | 43545115 | 43545942 | 828    | 43545618 | 158  |
| chr21 | 43605960 | 43606496 | 537    | 43606175 | 85   |

| Chr   | Start    | End      | Length | Summit   | Tags |
|-------|----------|----------|--------|----------|------|
| chr21 | 43617135 | 43617713 | 579    | 43617469 | 31   |
| chr21 | 43655442 | 43656052 | 611    | 43655884 | 51   |
| chr21 | 43664436 | 43664974 | 539    | 43664659 | 63   |
| chr21 | 43690321 | 43690907 | 587    | 43690595 | 33   |
| chr21 | 43754943 | 43755358 | 416    | 43755106 | 99   |
| chr21 | 43761099 | 43761439 | 341    | 43761283 | 66   |
| chr21 | 43971111 | 43971523 | 413    | 43971325 | 31   |
| chr21 | 44056696 | 44057193 | 498    | 44057050 | 66   |
| chr21 | 44399074 | 44399690 | 617    | 44399481 | 68   |
| chr21 | 44560038 | 44560545 | 508    | 44560168 | 30   |
| chr21 | 44860921 | 44861317 | 397    | 44861153 | 58   |
| chr21 | 44955339 | 44955717 | 379    | 44955464 | 23   |
| chr21 | 45010564 | 45011142 | 579    | 45010797 | 47   |
| chr21 | 45132880 | 45133362 | 483    | 45133174 | 103  |
| chr21 | 45210560 | 45211009 | 450    | 45210702 | 42   |
| chr21 | 45222252 | 45222702 | 451    | 45222456 | 27   |
| chr21 | 45256838 | 45257523 | 686    | 45257205 | 114  |
| chr21 | 45278832 | 45279256 | 425    | 45278957 | 28   |
| chr21 | 45543686 | 45544365 | 680    | 45543996 | 73   |
| chr21 | 45577743 | 45578397 | 655    | 45578088 | 124  |
| chr21 | 45647452 | 45648037 | 586    | 45647669 | 96   |
| chr21 | 45654247 | 45654921 | 675    | 45654453 | 183  |
| chr21 | 45771436 | 45772279 | 844    | 45771653 | 103  |
| chr21 | 46098352 | 46098659 | 308    | 46098510 | 46   |
| chr21 | 46879627 | 46880284 | 658    | 46879879 | 103  |
| chr22 | 15469811 | 15470189 | 379    | 15469980 | 94   |
| chr22 | 16666626 | 16667136 | 511    | 16666816 | 49   |
| chr22 | 16746925 | 16747295 | 371    | 16747086 | 126  |
| chr22 | 17296800 | 17297632 | 833    | 17297229 | 256  |
| chr22 | 17318916 | 17319234 | 319    | 17319047 | 57   |
| chr22 | 17497239 | 17497753 | 515    | 17497511 | 196  |
| chr22 | 18000097 | 18000512 | 416    | 18000305 | 110  |
| chr22 | 18133266 | 18134080 | 815    | 18133650 | 152  |
| chr22 | 18236203 | 18236938 | 736    | 18236556 | 60   |
| chr22 | 18605494 | 18606012 | 519    | 18605686 | 162  |
| chr22 | 18788096 | 18788786 | 691    | 18788511 | 136  |
| chr22 | 19109523 | 19110007 | 485    | 19109654 | 26   |
| chr22 | 19269689 | 19270388 | 700    | 19269978 | 35   |
| chr22 | 19663301 | 19663848 | 548    | 19663581 | 38   |
| chr22 | 19709516 | 19710497 | 982    | 19710194 | 189  |
| chr22 | 20120701 | 20121531 | 831    | 20120970 | 154  |
| chr22 | 20129069 | 20129537 | 469    | 20129196 | 29   |
| chr22 | 20182016 | 20182733 | 718    | 20182456 | 128  |
| chr22 | 20637085 | 20637568 | 484    | 20637237 | 24   |
| chr22 | 22575452 | 22575928 | 477    | 22575642 | 53   |
| chr22 | 23220864 | 23221375 | 512    | 23221150 | 72   |
| chr22 | 23423687 | 23424103 | 417    | 23423815 | 53   |
| chr22 | 23692124 | 23692518 | 395    | 23692370 | 80   |
| chr22 | 23702386 | 23702897 | 512    | 23702591 | 48   |
| chr22 | 23787688 | 23787930 | 243    | 23787809 | 22   |
| chr22 | 25397111 | 25397637 | 527    | 25397457 | 44   |
| chr22 | 25909400 | 25909871 | 472    | 25909701 | 100  |
| chr22 | 26445478 | 26445801 | 324    | 26445656 | 66   |

| Chr   | Start    | End      | Length | Summit   | Tags |
|-------|----------|----------|--------|----------|------|
| chr22 | 26480489 | 26480918 | 430    | 26480668 | 118  |
| chr22 | 27498520 | 27499020 | 501    | 27498695 | 28   |
| chr22 | 27709197 | 27709534 | 338    | 27709371 | 62   |
| chr22 | 27797231 | 27797890 | 660    | 27797567 | 345  |
| chr22 | 28443840 | 28444229 | 390    | 28443987 | 123  |
| chr22 | 29052519 | 29053233 | 715    | 29053055 | 180  |
| chr22 | 29903481 | 29903754 | 274    | 29903641 | 17   |
| chr22 | 29979964 | 29980373 | 410    | 29980168 | 125  |
| chr22 | 30054346 | 30054585 | 240    | 30054466 | 36   |
| chr22 | 30349423 | 30350147 | 725    | 30349789 | 27   |
| chr22 | 31370353 | 31370853 | 501    | 31370534 | 185  |
| chr22 | 31449670 | 31449946 | 277    | 31449799 | 55   |
| chr22 | 31717715 | 31718069 | 355    | 31717927 | 65   |
| chr22 | 34169239 | 34169927 | 689    | 34169551 | 49   |
| chr22 | 34184137 | 34184611 | 475    | 34184371 | 53   |
| chr22 | 34184856 | 34185297 | 442    | 34185114 | 59   |
| chr22 | 34266028 | 34266687 | 660    | 34266331 | 38   |
| chr22 | 35055372 | 35055784 | 413    | 35055528 | 146  |
| chr22 | 35169392 | 35169740 | 349    | 35169511 | 35   |
| chr22 | 36243809 | 36244370 | 562    | 36244190 | 82   |
| chr22 | 36267824 | 36268228 | 405    | 36268078 | 29   |
| chr22 | 36366816 | 36367464 | 649    | 36367149 | 79   |
| chr22 | 36416699 | 36417356 | 658    | 36417037 | 34   |
| chr22 | 36475768 | 36476352 | 585    | 36476071 | 36   |
| chr22 | 36624721 | 36625121 | 401    | 36624890 | 135  |
| chr22 | 36631771 | 36632448 | 678    | 36632185 | 134  |
| chr22 | 36725892 | 36726267 | 376    | 36726083 | 81   |
| chr22 | 36846320 | 36846887 | 568    | 36846518 | 43   |
| chr22 | 36850166 | 36850749 | 584    | 36850370 | 146  |
| chr22 | 37074109 | 37074562 | 454    | 37074363 | 42   |
| chr22 | 37123144 | 37123469 | 326    | 37123306 | 50   |
| chr22 | 37426761 | 37427396 | 636    | 37427053 | 38   |
| chr22 | 38323885 | 38324326 | 442    | 38324198 | 17   |
| chr22 | 38399722 | 38400071 | 350    | 38399874 | 42   |
| chr22 | 38720404 | 38721249 | 846    | 38720886 | 50   |
| chr22 | 38748868 | 38749404 | 537    | 38749059 | 43   |
| chr22 | 38818003 | 38818333 | 331    | 38818107 | 13   |
| chr22 | 39133896 | 39134250 | 355    | 39134122 | 43   |
| chr22 | 39963989 | 39964659 | 671    | 39964353 | 49   |
| chr22 | 40005862 | 40006395 | 534    | 40006214 | 77   |
| chr22 | 41014691 | 41015078 | 388    | 41014882 | 56   |
| chr22 | 41115080 | 41115620 | 541    | 41115346 | 99   |
| chr22 | 41151402 | 41152161 | 760    | 41151801 | 145  |
| chr22 | 41582888 | 41583553 | 666    | 41583033 | 142  |
| chr22 | 41821813 | 41822293 | 481    | 41821983 | 83   |
| chr22 | 41851773 | 41852474 | 702    | 41852125 | 40   |
| chr22 | 42130565 | 42131136 | 572    | 42130777 | 216  |
| chr22 | 42258162 | 42258430 | 269    | 42258286 | 24   |
| chr22 | 42262857 | 42263254 | 398    | 42263095 | 46   |
| chr22 | 42650944 | 42651460 | 517    | 42651214 | 22   |
| chr22 | 42653151 | 42653731 | 581    | 42653477 | 62   |
| chr22 | 42816517 | 42816797 | 281    | 42816640 | 23   |
| chr22 | 43460088 | 43460560 | 473    | 43460249 | 88   |

| Chr   | Start    | End      | Length | Summit   | Tags |
|-------|----------|----------|--------|----------|------|
| chr22 | 43774248 | 43774580 | 333    | 43774427 | 34   |
| chr22 | 44005875 | 44006158 | 284    | 44006027 | 30   |
| chr22 | 44021503 | 44021891 | 389    | 44021724 | 55   |
| chr22 | 44312166 | 44312842 | 677    | 44312418 | 191  |
| chr22 | 44717712 | 44718245 | 534    | 44717891 | 71   |
| chr22 | 44750211 | 44751941 | 1731   | 44751688 | 152  |
| chr22 | 44781703 | 44782426 | 724    | 44782098 | 68   |
| chr22 | 44788026 | 44788713 | 688    | 44788225 | 136  |
| chr22 | 44846220 | 44846940 | 721    | 44846653 | 175  |
| chr22 | 44922320 | 44922836 | 517    | 44922652 | 147  |
| chr22 | 45130045 | 45130520 | 476    | 45130362 | 29   |
| chr22 | 45141751 | 45142787 | 1037   | 45142435 | 93   |
| chr22 | 45226402 | 45226731 | 330    | 45226552 | 57   |
| chr22 | 45227435 | 45228201 | 767    | 45227814 | 64   |
| chr22 | 45289128 | 45289789 | 662    | 45289418 | 160  |
| chr22 | 45321825 | 45322317 | 493    | 45322145 | 62   |
| chr22 | 45332344 | 45332728 | 385    | 45332505 | 55   |
| chr22 | 45396501 | 45397215 | 715    | 45396846 | 42   |
| chr22 | 45400278 | 45401218 | 941    | 45400640 | 62   |
| chr22 | 45401750 | 45402503 | 754    | 45402103 | 163  |
| chr22 | 45429733 | 45430135 | 403    | 45429935 | 77   |
| chr22 | 45432670 | 45433301 | 632    | 45433048 | 104  |
| chr22 | 45571973 | 45572482 | 510    | 45572125 | 29   |
| chr22 | 45617216 | 45617500 | 285    | 45617376 | 30   |
| chr22 | 45904187 | 45904635 | 449    | 45904349 | 53   |
| chr22 | 48539960 | 48540269 | 310    | 48540107 | 61   |
| chr22 | 48929385 | 48930032 | 648    | 48929680 | 60   |
| chr22 | 48938633 | 48939026 | 394    | 48938767 | 27   |
| chr22 | 49086268 | 49086931 | 664    | 49086573 | 150  |
| chr22 | 49261907 | 49262426 | 520    | 49262259 | 31   |
| chr22 | 49289221 | 49290346 | 1126   | 49289884 | 307  |
| chr3  | 5011563  | 5011988  | 426    | 5011791  | 239  |
| chr3  | 5021331  | 5021800  | 470    | 5021514  | 90   |
| chr3  | 5042928  | 5043569  | 642    | 5043325  | 43   |
| chr3  | 10000145 | 10000394 | 250    | 10000270 | 23   |
| chr3  | 10211277 | 10211713 | 437    | 10211408 | 36   |
| chr3  | 10374218 | 10374589 | 372    | 10374447 | 44   |
| chr3  | 11288855 | 11289219 | 365    | 11289040 | 73   |
| chr3  | 11546480 | 11547001 | 522    | 11546761 | 212  |
| chr3  | 11577900 | 11578370 | 471    | 11578053 | 97   |
| chr3  | 11787264 | 11787807 | 544    | 11787439 | 197  |
| chr3  | 12205329 | 12205664 | 336    | 12205510 | 37   |
| chr3  | 12573284 | 12573897 | 614    | 12573526 | 83   |
| chr3  | 12775744 | 12776511 | 768    | 12776125 | 492  |
| chr3  | 12779778 | 12780271 | 494    | 12780051 | 138  |
| chr3  | 12873281 | 12873522 | 242    | 12873402 | 17   |
| chr3  | 13261527 | 13261814 | 288    | 13261652 | 33   |
| chr3  | 13471829 | 13472103 | 275    | 13471973 | 29   |
| chr3  | 13491431 | 13491994 | 564    | 13491599 | 163  |
| chr3  | 13564444 | 13564933 | 490    | 13564617 | 162  |
| chr3  | 13655492 | 13655915 | 424    | 13655622 | 18   |
| chr3  | 13853290 | 13853736 | 447    | 13853443 | 66   |
| chr3  | 13866463 | 13867345 | 883    | 13866753 | 80   |

| Chr  | Start    | End      | Length | Summit   | Tags |
|------|----------|----------|--------|----------|------|
| chr3 | 13907076 | 13907630 | 555    | 13907463 | 176  |
| chr3 | 14194705 | 14195248 | 544    | 14195084 | 104  |
| chr3 | 14216174 | 14216497 | 324    | 14216374 | 46   |
| chr3 | 14314298 | 14314788 | 491    | 14314606 | 126  |
| chr3 | 15027637 | 15027904 | 268    | 15027765 | 48   |
| chr3 | 18131136 | 18131654 | 519    | 18131504 | 69   |
| chr3 | 19963349 | 19963927 | 579    | 19963656 | 30   |
| chr3 | 22069225 | 22069705 | 481    | 22069544 | 23   |
| chr3 | 23962208 | 23962869 | 662    | 23962520 | 47   |
| chr3 | 24035441 | 24036005 | 565    | 24035808 | 38   |
| chr3 | 26297823 | 26298091 | 269    | 26297963 | 21   |
| chr3 | 32122637 | 32123530 | 894    | 32122946 | 248  |
| chr3 | 32438711 | 32439020 | 310    | 32438848 | 88   |
| chr3 | 33130510 | 33131216 | 707    | 33131023 | 95   |
| chr3 | 33815409 | 33815858 | 450    | 33815565 | 34   |
| chr3 | 37870144 | 37870709 | 566    | 37870428 | 169  |
| chr3 | 37876839 | 37877444 | 606    | 37876983 | 83   |
| chr3 | 38202241 | 38202547 | 307    | 38202397 | 32   |
| chr3 | 38470024 | 38470531 | 508    | 38470199 | 150  |
| chr3 | 41524481 | 41524917 | 437    | 41524778 | 28   |
| chr3 | 42531811 | 42532463 | 653    | 42531942 | 84   |
| chr3 | 44354819 | 44355354 | 536    | 44355012 | 80   |
| chr3 | 45204490 | 45204804 | 315    | 45204617 | 37   |
| chr3 | 45621138 | 45621355 | 218    | 45621247 | 25   |
| chr3 | 46677123 | 46677614 | 492    | 46677462 | 26   |
| chr3 | 46708960 | 46709584 | 625    | 46709211 | 100  |
| chr3 | 47397153 | 47397748 | 596    | 47397461 | 54   |
| chr3 | 48418708 | 48419089 | 382    | 48418891 | 260  |
| chr3 | 48448924 | 48449315 | 392    | 48449117 | 52   |
| chr3 | 48611242 | 48612061 | 820    | 48611790 | 157  |
| chr3 | 48721568 | 48721816 | 249    | 48721692 | 32   |
| chr3 | 49370540 | 49371424 | 885    | 49370966 | 245  |
| chr3 | 49815300 | 49816807 | 1508   | 49816401 | 406  |
| chr3 | 50163277 | 50163862 | 586    | 50163636 | 63   |
| chr3 | 50170175 | 50170758 | 584    | 50170485 | 95   |
| chr3 | 50179620 | 50180221 | 602    | 50179976 | 198  |
| chr3 | 50230094 | 50230462 | 369    | 50230276 | 42   |
| chr3 | 50267538 | 50268163 | 626    | 50267886 | 83   |
| chr3 | 50613453 | 50613949 | 497    | 50613637 | 46   |
| chr3 | 51965224 | 51966080 | 857    | 51965641 | 241  |
| chr3 | 51991974 | 51992679 | 706    | 51992324 | 31   |
| chr3 | 52055312 | 52055844 | 533    | 52055472 | 74   |
| chr3 | 52062444 | 52063178 | 735    | 52062867 | 345  |
| chr3 | 52076056 | 52076424 | 369    | 52076298 | 37   |
| chr3 | 52415308 | 52415859 | 552    | 52415558 | 214  |
| chr3 | 52545266 | 52545763 | 498    | 52545436 | 191  |
| chr3 | 52694840 | 52695407 | 568    | 52695018 | 203  |
| chr3 | 53008214 | 53008642 | 429    | 53008435 | 67   |
| chr3 | 53098620 | 53098926 | 307    | 53098750 | 22   |
| chr3 | 53173994 | 53174314 | 321    | 53174146 | 30   |
| chr3 | 53278950 | 53279455 | 506    | 53279181 | 188  |
| chr3 | 53504675 | 53505286 | 612    | 53505108 | 57   |
| chr3 | 54473196 | 54473668 | 473    | 54473487 | 16   |

| Chr  | Start     | End       | Length | Summit    | Tags |
|------|-----------|-----------|--------|-----------|------|
| chr3 | 55491831  | 55492163  | 333    | 55492025  | 46   |
| chr3 | 63097268  | 63097780  | 513    | 63097454  | 24   |
| chr3 | 63914994  | 63915263  | 270    | 63915142  | 15   |
| chr3 | 69144315  | 69144844  | 530    | 69144467  | 142  |
| chr3 | 71560661  | 71561029  | 369    | 71560790  | 34   |
| chr3 | 72759912  | 72760248  | 337    | 72760063  | 107  |
| chr3 | 81893063  | 81893735  | 673    | 81893474  | 237  |
| chr3 | 85421893  | 85422508  | 616    | 85422213  | 16   |
| chr3 | 101802011 | 101802423 | 413    | 101802156 | 50   |
| chr3 | 102775569 | 102776083 | 515    | 102775955 | 42   |
| chr3 | 103050398 | 103051081 | 684    | 103050656 | 48   |
| chr3 | 108114510 | 108115095 | 586    | 108114864 | 20   |
| chr3 | 109950981 | 109951676 | 696    | 109951369 | 30   |
| chr3 | 115354281 | 115354587 | 307    | 115354459 | 20   |
| chr3 | 121313534 | 121313794 | 261    | 121313664 | 18   |
| chr3 | 122750209 | 122750433 | 225    | 122750321 | 20   |
| chr3 | 126088117 | 126088843 | 727    | 126088471 | 29   |
| chr3 | 126849157 | 126849480 | 324    | 126849349 | 64   |
| chr3 | 127127140 | 127127568 | 429    | 127127350 | 38   |
| chr3 | 127258842 | 127259245 | 404    | 127259026 | 119  |
| chr3 | 127954793 | 127955162 | 370    | 127954973 | 201  |
| chr3 | 128158570 | 128159178 | 609    | 128158939 | 123  |
| chr3 | 128207154 | 128207687 | 534    | 128207542 | 64   |
| chr3 | 128849022 | 128849335 | 314    | 128849193 | 49   |
| chr3 | 129253487 | 129254318 | 832    | 129253822 | 194  |
| chr3 | 129296663 | 129297083 | 421    | 129296920 | 115  |
| chr3 | 129538914 | 129539215 | 302    | 129539037 | 52   |
| chr3 | 129689238 | 129689614 | 377    | 129689476 | 38   |
| chr3 | 130194585 | 130195076 | 492    | 130194847 | 68   |
| chr3 | 130288717 | 130289183 | 467    | 130289021 | 33   |
| chr3 | 133578035 | 133578694 | 660    | 133578337 | 23   |
| chr3 | 135583410 | 135583719 | 310    | 135583588 | 30   |
| chr3 | 135687177 | 135687813 | 637    | 135687557 | 44   |
| chr3 | 138661719 | 138662391 | 673    | 138662057 | 19   |
| chr3 | 139583474 | 139583862 | 389    | 139583710 | 39   |
| chr3 | 140636498 | 140636861 | 364    | 140636674 | 148  |
| chr3 | 142295259 | 142295921 | 663    | 142295594 | 29   |
| chr3 | 143139030 | 143139587 | 558    | 143139333 | 101  |
| chr3 | 151963041 | 151964128 | 1088   | 151963704 | 95   |
| chr3 | 154360886 | 154361442 | 557    | 154361270 | 221  |
| chr3 | 156325331 | 156325841 | 511    | 156325498 | 21   |
| chr3 | 157881538 | 157881748 | 211    | 157881643 | 12   |
| chr3 | 159932368 | 159932931 | 564    | 159932594 | 40   |
| chr3 | 160963810 | 160964544 | 735    | 160964208 | 178  |
| chr3 | 161082253 | 161082631 | 379    | 161082445 | 84   |
| chr3 | 161955766 | 161956213 | 448    | 161955972 | 31   |
| chr3 | 168580476 | 168580828 | 353    | 168580653 | 54   |
| chr3 | 169296523 | 169296847 | 325    | 169296686 | 76   |
| chr3 | 170973385 | 170973919 | 535    | 170973547 | 120  |
| chr3 | 173356802 | 173357095 | 294    | 173356933 | 30   |
| chr3 | 175641330 | 175642125 | 796    | 175641903 | 111  |
| chr3 | 178648458 | 178648787 | 330    | 178648621 | 33   |
| chr3 | 180332601 | 180333265 | 665    | 180332894 | 41   |



| Chr  | Start     | End       | Length | Summit    | Tags |
|------|-----------|-----------|--------|-----------|------|
| chr3 | 183246844 | 183247211 | 368    | 183247049 | 40   |
| chr3 | 183383122 | 183383434 | 313    | 183383247 | 15   |
| chr3 | 184837041 | 184837685 | 645    | 184837383 | 35   |
| chr3 | 185726297 | 185726773 | 477    | 185726455 | 123  |
| chr3 | 185941439 | 185942026 | 588    | 185941817 | 177  |
| chr3 | 187014037 | 187014453 | 417    | 187014297 | 123  |
| chr3 | 187983495 | 187983944 | 450    | 187983647 | 47   |
| chr3 | 188383733 | 188384165 | 433    | 188383874 | 85   |
| chr3 | 189549205 | 189549535 | 331    | 189549333 | 33   |
| chr3 | 191034534 | 191034746 | 213    | 191034640 | 18   |
| chr3 | 191714136 | 191714570 | 435    | 191714314 | 39   |
| chr3 | 194050816 | 194051253 | 438    | 194051100 | 104  |
| chr3 | 194431725 | 194431962 | 238    | 194431844 | 19   |
| chr3 | 195031015 | 195031602 | 588    | 195031381 | 73   |
| chr3 | 195258715 | 195259158 | 444    | 195258991 | 92   |
| chr3 | 195271066 | 195272048 | 983    | 195271402 | 214  |
| chr3 | 195290046 | 195290515 | 470    | 195290317 | 161  |
| chr3 | 195339925 | 195340255 | 331    | 195340110 | 59   |
| chr3 | 196073445 | 196073883 | 439    | 196073638 | 137  |
| chr3 | 196370347 | 196370856 | 510    | 196370583 | 52   |
| chr3 | 197074441 | 197074935 | 495    | 197074570 | 44   |
| chr3 | 197127568 | 197127850 | 283    | 197127697 | 22   |
| chr3 | 197354162 | 197354619 | 458    | 197354491 | 37   |
| chr3 | 198591997 | 198592450 | 454    | 198592175 | 32   |
| chr3 | 198605626 | 198606195 | 570    | 198606035 | 60   |
| chr3 | 199300744 | 199301040 | 297    | 199300858 | 24   |
| chr4 | 503335    | 504031    | 697    | 503620    | 445  |
| chr4 | 558815    | 559498    | 684    | 559128    | 35   |
| chr4 | 661607    | 662303    | 697    | 661899    | 100  |
| chr4 | 665433    | 665938    | 506    | 665636    | 36   |
| chr4 | 945337    | 945781    | 445    | 945626    | 48   |
| chr4 | 1202364   | 1202571   | 208    | 1202468   | 24   |
| chr4 | 1207437   | 1207948   | 512    | 1207653   | 63   |
| chr4 | 1215348   | 1215870   | 523    | 1215521   | 88   |
| chr4 | 1280296   | 1281051   | 756    | 1280638   | 107  |
| chr4 | 1284940   | 1285183   | 244    | 1285062   | 33   |
| chr4 | 1616294   | 1616907   | 614    | 1616697   | 115  |
| chr4 | 1729706   | 1730412   | 707    | 1730067   | 85   |
| chr4 | 1744547   | 1745168   | 622    | 1744920   | 39   |
| chr4 | 1760801   | 1761646   | 846    | 1761323   | 221  |
| chr4 | 2221112   | 2221622   | 511    | 2221365   | 66   |
| chr4 | 2507725   | 2508236   | 512    | 2508015   | 143  |
| chr4 | 2908772   | 2909209   | 438    | 2908974   | 188  |
| chr4 | 3356919   | 3357717   | 799    | 3357217   | 104  |
| chr4 | 3408200   | 3408830   | 631    | 3408634   | 309  |
| chr4 | 3455946   | 3456541   | 596    | 3456354   | 174  |
| chr4 | 3755922   | 3756388   | 467    | 3756182   | 101  |
| chr4 | 3992686   | 3993151   | 466    | 3992864   | 33   |
| chr4 | 4444938   | 4445509   | 572    | 4445343   | 86   |
| chr4 | 5825893   | 5826237   | 345    | 5826038   | 29   |
| chr4 | 6815962   | 6816428   | 467    | 6816286   | 71   |
| chr4 | 7483025   | 7483579   | 555    | 7483240   | 39   |
| chr4 | 7599959   | 7600544   | 586    | 7600358   | 64   |

| Chr  | Start     | End       | Length | Summit    | Tags |
|------|-----------|-----------|--------|-----------|------|
| chr4 | 7704241   | 7704766   | 526    | 7704407   | 63   |
| chr4 | 7982143   | 7982590   | 448    | 7982302   | 49   |
| chr4 | 8030809   | 8031337   | 529    | 8031179   | 102  |
| chr4 | 8082238   | 8083416   | 1179   | 8083169   | 197  |
| chr4 | 8159854   | 8160538   | 685    | 8160204   | 95   |
| chr4 | 8241321   | 8241962   | 642    | 8241631   | 194  |
| chr4 | 8258540   | 8259302   | 763    | 8258904   | 187  |
| chr4 | 9699156   | 9699479   | 324    | 9699313   | 81   |
| chr4 | 13094815  | 13095250  | 436    | 13095040  | 44   |
| chr4 | 13377420  | 13377713  | 294    | 13377598  | 33   |
| chr4 | 13554931  | 13555310  | 380    | 13555095  | 86   |
| chr4 | 15292014  | 15292534  | 521    | 15292178  | 51   |
| chr4 | 15516486  | 15517026  | 541    | 15516802  | 37   |
| chr4 | 24374403  | 24374655  | 253    | 24374529  | 26   |
| chr4 | 24987446  | 24987973  | 528    | 24987601  | 125  |
| chr4 | 35198067  | 35198423  | 357    | 35198243  | 14   |
| chr4 | 37364465  | 37365066  | 602    | 37364868  | 155  |
| chr4 | 39934408  | 39934742  | 335    | 39934549  | 20   |
| chr4 | 45263812  | 45264333  | 522    | 45264080  | 11   |
| chr4 | 47713987  | 47714335  | 349    | 47714176  | 23   |
| chr4 | 52405410  | 52406005  | 596    | 52405768  | 43   |
| chr4 | 52612308  | 52613186  | 879    | 52612904  | 222  |
| chr4 | 53377688  | 53378162  | 475    | 53377841  | 22   |
| chr4 | 53398708  | 53398982  | 275    | 53398830  | 48   |
| chr4 | 55958634  | 55958924  | 291    | 55958781  | 70   |
| chr4 | 56180163  | 56180794  | 632    | 56180529  | 25   |
| chr4 | 57174067  | 57174442  | 376    | 57174232  | 46   |
| chr4 | 61920874  | 61921439  | 566    | 61921097  | 23   |
| chr4 | 62080724  | 62080978  | 255    | 62080851  | 31   |
| chr4 | 62979893  | 62980144  | 252    | 62980019  | 17   |
| chr4 | 75498023  | 75498527  | 505    | 75498205  | 267  |
| chr4 | 76868470  | 76868929  | 460    | 76868644  | 43   |
| chr4 | 78958799  | 78959250  | 452    | 78958916  | 19   |
| chr4 | 83577833  | 83578129  | 297    | 83577998  | 17   |
| chr4 | 85266927  | 85267681  | 755    | 85267444  | 33   |
| chr4 | 85722626  | 85723351  | 726    | 85722969  | 47   |
| chr4 | 89424830  | 89425109  | 280    | 89424957  | 34   |
| chr4 | 90821397  | 90821817  | 421    | 90821570  | 150  |
| chr4 | 91821281  | 91821783  | 503    | 91821490  | 15   |
| chr4 | 92931630  | 92931933  | 304    | 92931775  | 18   |
| chr4 | 94967290  | 94967959  | 670    | 94967623  | 47   |
| chr4 | 95591830  | 95592287  | 458    | 95591961  | 64   |
| chr4 | 99401220  | 99401707  | 488    | 99401420  | 38   |
| chr4 | 100135446 | 100136442 | 997    | 100136146 | 77   |
| chr4 | 107036598 | 107037299 | 702    | 107036999 | 77   |
| chr4 | 109130198 | 109130697 | 500    | 109130326 | 38   |
| chr4 | 120208050 | 120208404 | 355    | 120208231 | 26   |
| chr4 | 120420148 | 120420541 | 394    | 120420272 | 13   |
| chr4 | 122716184 | 122716427 | 244    | 122716306 | 14   |
| chr4 | 122941771 | 122942242 | 472    | 122941947 | 71   |
| chr4 | 124538590 | 124539259 | 670    | 124538906 | 30   |
| chr4 | 128709677 | 128709867 | 191    | 128709772 | 14   |
| chr4 | 129428552 | 129429272 | 721    | 129428936 | 43   |

| Chr  | Start     | End       | Length | Summit    | Tags |
|------|-----------|-----------|--------|-----------|------|
| chr4 | 140156128 | 140156713 | 586    | 140156373 | 27   |
| chr4 | 140709159 | 140709504 | 346    | 140709353 | 118  |
| chr4 | 141028513 | 141028939 | 427    | 141028726 | 70   |
| chr4 | 141448986 | 141449530 | 545    | 141449237 | 129  |
| chr4 | 148961549 | 148962013 | 465    | 148961712 | 149  |
| chr4 | 151397546 | 151397892 | 347    | 151397746 | 39   |
| chr4 | 154164108 | 154164547 | 440    | 154164380 | 111  |
| chr4 | 154485049 | 154485666 | 618    | 154485289 | 103  |
| chr4 | 154932801 | 154933156 | 356    | 154933027 | 28   |
| chr4 | 157508108 | 157508438 | 331    | 157508313 | 12   |
| chr4 | 159311712 | 159312106 | 395    | 159311937 | 90   |
| chr4 | 164634567 | 164635318 | 752    | 164634850 | 36   |
| chr4 | 166519563 | 166520070 | 508    | 166519693 | 27   |
| chr4 | 169990886 | 169991220 | 335    | 169991048 | 59   |
| chr4 | 170167957 | 170168318 | 362    | 170168113 | 93   |
| chr4 | 170915468 | 170915855 | 388    | 170915698 | 22   |
| chr4 | 183972247 | 183972614 | 368    | 183972374 | 39   |
| chr4 | 184075284 | 184075793 | 510    | 184075502 | 33   |
| chr4 | 184256940 | 184257949 | 1010   | 184257248 | 39   |
| chr4 | 184515083 | 184515710 | 628    | 184515320 | 189  |
| chr4 | 185031314 | 185031793 | 480    | 185031461 | 22   |
| chr4 | 185145714 | 185146074 | 361    | 185145874 | 107  |
| chr4 | 185632625 | 185633183 | 559    | 185632981 | 32   |
| chr4 | 185829289 | 185829581 | 293    | 185829407 | 26   |
| chr4 | 185973080 | 185973546 | 467    | 185973393 | 66   |
| chr4 | 187884589 | 187885152 | 564    | 187884784 | 49   |
| chr4 | 189160926 | 189161229 | 304    | 189161053 | 26   |
| chr4 | 190295326 | 190296015 | 690    | 190295664 | 30   |
| chr4 | 190968412 | 190969257 | 846    | 190968895 | 66   |
| chr5 | 507087    | 507589    | 503    | 507453    | 38   |
| chr5 | 914473    | 914969    | 497    | 914679    | 160  |
| chr5 | 965513    | 966064    | 552    | 965874    | 43   |
| chr5 | 1335287   | 1335600   | 314    | 1335438   | 49   |
| chr5 | 1937022   | 1937502   | 481    | 1937359   | 52   |
| chr5 | 2073880   | 2074209   | 330    | 2074061   | 43   |
| chr5 | 3335668   | 3336501   | 834    | 3336001   | 57   |
| chr5 | 5324175   | 5324718   | 544    | 5324551   | 96   |
| chr5 | 6818719   | 6819337   | 619    | 6818921   | 208  |
| chr5 | 7639631   | 7639933   | 303    | 7639762   | 21   |
| chr5 | 9520693   | 9521008   | 316    | 9520872   | 57   |
| chr5 | 10360549  | 10361012  | 464    | 10360719  | 210  |
| chr5 | 10683080  | 10683594  | 515    | 10683403  | 53   |
| chr5 | 13196765  | 13197088  | 324    | 13196958  | 16   |
| chr5 | 14235858  | 14236250  | 393    | 14236053  | 106  |
| chr5 | 15061577  | 15062038  | 462    | 15061874  | 41   |
| chr5 | 17359417  | 17359735  | 319    | 17359552  | 28   |
| chr5 | 27507938  | 27508221  | 284    | 27508057  | 36   |
| chr5 | 33025752  | 33026071  | 320    | 33025912  | 47   |
| chr5 | 34043496  | 34044313  | 818    | 34044032  | 119  |
| chr5 | 34280727  | 34281219  | 493    | 34280929  | 12   |
| chr5 | 39823643  | 39824306  | 664    | 39823957  | 23   |
| chr5 | 41960925  | 41961526  | 602    | 41961167  | 36   |
| chr5 | 64045980  | 64046384  | 405    | 64046201  | 18   |

| Chr  | Start     | End       | Length | Summit    | Tags |
|------|-----------|-----------|--------|-----------|------|
| chr5 | 68326825  | 68327084  | 260    | 68326955  | 18   |
| chr5 | 70918687  | 70919192  | 506    | 70918853  | 57   |
| chr5 | 71142397  | 71142873  | 477    | 71142591  | 27   |
| chr5 | 72851178  | 72851465  | 288    | 72851308  | 61   |
| chr5 | 72896714  | 72897351  | 638    | 72896950  | 111  |
| chr5 | 73348691  | 73349107  | 417    | 73348817  | 44   |
| chr5 | 74943775  | 74944107  | 333    | 74943935  | 95   |
| chr5 | 74973885  | 74974612  | 728    | 74974249  | 29   |
| chr5 | 76143157  | 76143689  | 533    | 76143311  | 32   |
| chr5 | 79021727  | 79022096  | 370    | 79021985  | 19   |
| chr5 | 79322319  | 79322887  | 569    | 79322604  | 38   |
| chr5 | 83713741  | 83714135  | 395    | 83713950  | 192  |
| chr5 | 89805869  | 89806687  | 819    | 89806462  | 50   |
| chr5 | 95769578  | 95769897  | 320    | 95769760  | 42   |
| chr5 | 96169486  | 96170021  | 536    | 96169859  | 111  |
| chr5 | 98137278  | 98138030  | 753    | 98137670  | 37   |
| chr5 | 106094557 | 106094940 | 384    | 106094687 | 32   |
| chr5 | 107034385 | 107034819 | 435    | 107034628 | 22   |
| chr5 | 108112135 | 108112965 | 831    | 108112555 | 61   |
| chr5 | 112408355 | 112408694 | 340    | 112408569 | 49   |
| chr5 | 112525359 | 112525723 | 365    | 112525557 | 90   |
| chr5 | 112851942 | 112852349 | 408    | 112852097 | 65   |
| chr5 | 115742022 | 115742337 | 316    | 115742150 | 53   |
| chr5 | 115939228 | 115939551 | 324    | 115939394 | 118  |
| chr5 | 116494747 | 116494967 | 221    | 116494857 | 11   |
| chr5 | 122400099 | 122400802 | 704    | 122400410 | 44   |
| chr5 | 122786537 | 122787184 | 648    | 122786860 | 128  |
| chr5 | 127902693 | 127903029 | 337    | 127902855 | 32   |
| chr5 | 130261223 | 130261891 | 669    | 130261572 | 29   |
| chr5 | 130345382 | 130345623 | 242    | 130345503 | 18   |
| chr5 | 130527987 | 130528474 | 488    | 130528166 | 25   |
| chr5 | 131622719 | 131623372 | 654    | 131623171 | 61   |
| chr5 | 132787346 | 132787822 | 477    | 132787526 | 80   |
| chr5 | 133474087 | 133474417 | 331    | 133474249 | 193  |
| chr5 | 133888538 | 133889210 | 673    | 133888897 | 60   |
| chr5 | 134700716 | 134701112 | 397    | 134700861 | 26   |
| chr5 | 137856456 | 137856893 | 438    | 137856665 | 43   |
| chr5 | 137868411 | 137868860 | 450    | 137868655 | 33   |
| chr5 | 137939315 | 137939630 | 316    | 137939473 | 61   |
| chr5 | 138778982 | 138779365 | 384    | 138779171 | 181  |
| chr5 | 139147696 | 139148447 | 752    | 139148020 | 102  |
| chr5 | 139223162 | 139223482 | 321    | 139223335 | 32   |
| chr5 | 139917023 | 139917465 | 443    | 139917286 | 250  |
| chr5 | 141073824 | 141074123 | 300    | 141073953 | 55   |
| chr5 | 141143381 | 141143662 | 282    | 141143512 | 49   |
| chr5 | 141295289 | 141295609 | 321    | 141295464 | 30   |
| chr5 | 142045583 | 142046042 | 460    | 142045875 | 105  |
| chr5 | 142560488 | 142560816 | 329    | 142560639 | 109  |
| chr5 | 142763082 | 142763754 | 673    | 142763460 | 38   |
| chr5 | 147679812 | 147680542 | 731    | 147680168 | 35   |
| chr5 | 148185767 | 148186687 | 921    | 148185997 | 78   |
| chr5 | 148422702 | 148423258 | 557    | 148423002 | 46   |
| chr5 | 148566668 | 148567010 | 343    | 148566826 | 132  |

| Chr  | Start     | End       | Length | Summit    | Tags |
|------|-----------|-----------|--------|-----------|------|
| chr5 | 148631818 | 148632435 | 618    | 148632205 | 44   |
| chr5 | 148800055 | 148800395 | 341    | 148800247 | 50   |
| chr5 | 148801597 | 148802206 | 610    | 148801772 | 66   |
| chr5 | 148834015 | 148834405 | 391    | 148834227 | 76   |
| chr5 | 148911179 | 148911479 | 301    | 148911337 | 103  |
| chr5 | 149165608 | 149166062 | 455    | 149165803 | 144  |
| chr5 | 149643988 | 149644490 | 503    | 149644363 | 38   |
| chr5 | 149790822 | 149791210 | 389    | 149790971 | 36   |
| chr5 | 149852299 | 149852664 | 366    | 149852520 | 64   |
| chr5 | 149880584 | 149881169 | 586    | 149881017 | 106  |
| chr5 | 149994805 | 149995371 | 567    | 149995009 | 185  |
| chr5 | 150930890 | 150931392 | 503    | 150931186 | 73   |
| chr5 | 150932411 | 150932788 | 378    | 150932614 | 185  |
| chr5 | 150941634 | 150941969 | 336    | 150941768 | 111  |
| chr5 | 150945804 | 150946162 | 359    | 150945979 | 81   |
| chr5 | 150975149 | 150975494 | 346    | 150975326 | 92   |
| chr5 | 152019144 | 152019597 | 454    | 152019300 | 28   |
| chr5 | 153755507 | 153756036 | 530    | 153755672 | 44   |
| chr5 | 158690940 | 158691317 | 378    | 158691071 | 110  |
| chr5 | 162797106 | 162797718 | 613    | 162797522 | 145  |
| chr5 | 163893066 | 163893342 | 277    | 163893218 | 15   |
| chr5 | 167750141 | 167750422 | 282    | 167750301 | 29   |
| chr5 | 169510626 | 169510965 | 340    | 169510757 | 53   |
| chr5 | 169855389 | 169855716 | 328    | 169855589 | 51   |
| chr5 | 170747036 | 170747357 | 322    | 170747202 | 20   |
| chr5 | 171778605 | 171779072 | 468    | 171778870 | 35   |
| chr5 | 171842069 | 171842361 | 293    | 171842200 | 30   |
| chr5 | 171996604 | 171997128 | 525    | 171996802 | 98   |
| chr5 | 172019427 | 172019889 | 463    | 172019631 | 82   |
| chr5 | 172220273 | 172220867 | 595    | 172220663 | 52   |
| chr5 | 172259554 | 172260019 | 466    | 172259812 | 71   |
| chr5 | 172643230 | 172643689 | 460    | 172643530 | 27   |
| chr5 | 172691539 | 172691846 | 308    | 172691712 | 26   |
| chr5 | 173784928 | 173785215 | 288    | 173785086 | 43   |
| chr5 | 175760382 | 175760719 | 338    | 175760588 | 61   |
| chr5 | 175901096 | 175901522 | 427    | 175901244 | 80   |
| chr5 | 176014552 | 176015038 | 487    | 176014776 | 45   |
| chr5 | 176789935 | 176790685 | 751    | 176790336 | 188  |
| chr5 | 176898570 | 176898902 | 333    | 176898710 | 54   |
| chr5 | 177345248 | 177345695 | 448    | 177345530 | 41   |
| chr5 | 177365890 | 177366514 | 625    | 177366222 | 20   |
| chr5 | 179431409 | 179432128 | 720    | 179431822 | 182  |
| chr5 | 179651819 | 179652349 | 531    | 179652026 | 32   |
| chr5 | 180384252 | 180384577 | 326    | 180384383 | 31   |
| chr5 | 180564471 | 180565254 | 784    | 180564852 | 58   |
| chr6 | 2190339   | 2191017   | 679    | 2190642   | 67   |
| chr6 | 2414681   | 2415038   | 358    | 2414862   | 43   |
| chr6 | 2710131   | 2710893   | 763    | 2710260   | 113  |
| chr6 | 3008939   | 3009325   | 387    | 3009098   | 43   |
| chr6 | 3341783   | 3342107   | 325    | 3341925   | 53   |
| chr6 | 3463533   | 3463857   | 325    | 3463700   | 22   |
| chr6 | 4720594   | 4721198   | 605    | 4720943   | 47   |
| chr6 | 5851305   | 5851547   | 243    | 5851426   | 14   |

| Chr  | Start    | End      | Length | Summit   | Tags |
|------|----------|----------|--------|----------|------|
| chr6 | 7212758  | 7213273  | 516    | 7212931  | 66   |
| chr6 | 7424798  | 7425471  | 674    | 7425124  | 27   |
| chr6 | 10271474 | 10271817 | 344    | 10271636 | 25   |
| chr6 | 10520862 | 10521789 | 928    | 10521356 | 99   |
| chr6 | 10830992 | 10831528 | 537    | 10831253 | 76   |
| chr6 | 11878927 | 11879255 | 329    | 11879096 | 40   |
| chr6 | 12336941 | 12337175 | 235    | 12337058 | 24   |
| chr6 | 17973569 | 17973813 | 245    | 17973691 | 19   |
| chr6 | 18461124 | 18461455 | 332    | 18461280 | 18   |
| chr6 | 18495202 | 18495790 | 589    | 18495414 | 101  |
| chr6 | 19646257 | 19646686 | 430    | 19646463 | 68   |
| chr6 | 24234104 | 24234463 | 360    | 24234279 | 36   |
| chr6 | 25326626 | 25326997 | 372    | 25326846 | 32   |
| chr6 | 26797778 | 26798164 | 387    | 26798000 | 149  |
| chr6 | 29755674 | 29756024 | 351    | 29755858 | 125  |
| chr6 | 30002391 | 30002927 | 537    | 30002629 | 32   |
| chr6 | 30177790 | 30178314 | 525    | 30177943 | 86   |
| chr6 | 30596584 | 30597174 | 591    | 30596957 | 173  |
| chr6 | 30692920 | 30693284 | 365    | 30693048 | 35   |
| chr6 | 30762993 | 30763431 | 439    | 30763249 | 74   |
| chr6 | 30766630 | 30767071 | 442    | 30766896 | 159  |
| chr6 | 30820358 | 30820707 | 350    | 30820517 | 84   |
| chr6 | 30959482 | 30960522 | 1041   | 30959757 | 156  |
| chr6 | 30965709 | 30966332 | 624    | 30966020 | 71   |
| chr6 | 30977980 | 30978404 | 425    | 30978125 | 22   |
| chr6 | 32071483 | 32072155 | 673    | 32071861 | 71   |
| chr6 | 32104293 | 32104892 | 600    | 32104595 | 74   |
| chr6 | 32271234 | 32271894 | 661    | 32271563 | 78   |
| chr6 | 33047249 | 33047669 | 421    | 33047428 | 61   |
| chr6 | 33280573 | 33281025 | 453    | 33280829 | 28   |
| chr6 | 33373871 | 33374198 | 328    | 33374001 | 23   |
| chr6 | 33716889 | 33717494 | 606    | 33717084 | 202  |
| chr6 | 33827990 | 33828437 | 448    | 33828161 | 42   |
| chr6 | 33910342 | 33910958 | 617    | 33910782 | 114  |
| chr6 | 33913949 | 33914483 | 535    | 33914224 | 86   |
| chr6 | 33914508 | 33915287 | 780    | 33914896 | 76   |
| chr6 | 35152920 | 35153662 | 743    | 35153253 | 131  |
| chr6 | 35373666 | 35374248 | 583    | 35374030 | 43   |
| chr6 | 35487820 | 35488294 | 475    | 35488008 | 52   |
| chr6 | 35561725 | 35562528 | 804    | 35562108 | 287  |
| chr6 | 36205972 | 36206478 | 507    | 36206146 | 36   |
| chr6 | 36306130 | 36306552 | 423    | 36306390 | 88   |
| chr6 | 36345826 | 36346258 | 433    | 36346073 | 33   |
| chr6 | 36449125 | 36449789 | 665    | 36449569 | 90   |
| chr6 | 36683891 | 36684265 | 375    | 36684079 | 52   |
| chr6 | 36742677 | 36743220 | 544    | 36743039 | 120  |
| chr6 | 36751923 | 36752334 | 412    | 36752160 | 70   |
| chr6 | 36756004 | 36756418 | 415    | 36756270 | 37   |
| chr6 | 36758117 | 36758841 | 725    | 36758403 | 110  |
| chr6 | 37132158 | 37132723 | 566    | 37132445 | 160  |
| chr6 | 37159047 | 37159467 | 421    | 37159177 | 70   |
| chr6 | 41712540 | 41713006 | 467    | 41712671 | 26   |
| chr6 | 41719854 | 41720533 | 680    | 41720145 | 147  |

| Chr  | Start     | End       | Length | Summit    | Tags |
|------|-----------|-----------|--------|-----------|------|
| chr6 | 42125971  | 42126522  | 552    | 42126212  | 27   |
| chr6 | 42175018  | 42175301  | 284    | 42175173  | 23   |
| chr6 | 42217733  | 42218254  | 522    | 42217913  | 75   |
| chr6 | 42965977  | 42966977  | 1001   | 42966789  | 98   |
| chr6 | 43172280  | 43172664  | 385    | 43172455  | 33   |
| chr6 | 43258059  | 43258352  | 294    | 43258190  | 27   |
| chr6 | 43359634  | 43360117  | 484    | 43359965  | 63   |
| chr6 | 43571962  | 43572734  | 773    | 43572202  | 196  |
| chr6 | 43809754  | 43810306  | 553    | 43809946  | 49   |
| chr6 | 44138518  | 44139044  | 527    | 44138779  | 59   |
| chr6 | 44204085  | 44204739  | 655    | 44204558  | 96   |
| chr6 | 44277563  | 44277938  | 376    | 44277752  | 120  |
| chr6 | 44321793  | 44322369  | 577    | 44322082  | 45   |
| chr6 | 47863881  | 47864224  | 344    | 47864002  | 35   |
| chr6 | 48186786  | 48187033  | 248    | 48186910  | 12   |
| chr6 | 49340516  | 49340937  | 422    | 49340715  | 51   |
| chr6 | 50916467  | 50916782  | 316    | 50916618  | 66   |
| chr6 | 50926091  | 50926494  | 404    | 50926342  | 113  |
| chr6 | 52549769  | 52550316  | 548    | 52550107  | 65   |
| chr6 | 54818962  | 54819738  | 777    | 54819393  | 170  |
| chr6 | 58288022  | 58288420  | 399    | 58288175  | 91   |
| chr6 | 64341036  | 64341938  | 903    | 64341551  | 165  |
| chr6 | 64366499  | 64366772  | 274    | 64366663  | 14   |
| chr6 | 76367870  | 76368968  | 1099   | 76368786  | 115  |
| chr6 | 86445651  | 86445953  | 303    | 86445801  | 44   |
| chr6 | 88711099  | 88711440  | 342    | 88711269  | 67   |
| chr6 | 90118845  | 90119614  | 770    | 90119270  | 40   |
| chr6 | 90717442  | 90717821  | 380    | 90717693  | 59   |
| chr6 | 94969707  | 94970162  | 456    | 94970045  | 15   |
| chr6 | 101435395 | 101435875 | 481    | 101435565 | 68   |
| chr6 | 105927399 | 105927726 | 328    | 105927582 | 32   |
| chr6 | 107051387 | 107051669 | 283    | 107051507 | 19   |
| chr6 | 108032572 | 108032936 | 365    | 108032693 | 20   |
| chr6 | 108688897 | 108689388 | 492    | 108689206 | 24   |
| chr6 | 108986100 | 108986607 | 508    | 108986395 | 37   |
| chr6 | 109436751 | 109437316 | 566    | 109437001 | 20   |
| chr6 | 109523296 | 109523719 | 424    | 109523407 | 12   |
| chr6 | 109678579 | 109679013 | 435    | 109678697 | 18   |
| chr6 | 110472051 | 110472328 | 278    | 110472176 | 47   |
| chr6 | 111911468 | 111912182 | 715    | 111912031 | 177  |
| chr6 | 112019218 | 112019734 | 517    | 112019387 | 34   |
| chr6 | 125408931 | 125409409 | 479    | 125409056 | 19   |
| chr6 | 129715934 | 129716302 | 369    | 129716132 | 50   |
| chr6 | 132615040 | 132615358 | 319    | 132615193 | 66   |
| chr6 | 138397656 | 138398202 | 547    | 138398010 | 279  |
| chr6 | 138469862 | 138470780 | 919    | 138470363 | 193  |
| chr6 | 142740134 | 142740423 | 290    | 142740273 | 23   |
| chr6 | 143307529 | 143308496 | 968    | 143307987 | 188  |
| chr6 | 144040680 | 144041139 | 460    | 144040856 | 26   |
| chr6 | 150263215 | 150263711 | 497    | 150263566 | 42   |
| chr6 | 150367844 | 150368458 | 615    | 150368166 | 119  |
| chr6 | 150596585 | 150596850 | 266    | 150596721 | 29   |
| chr6 | 150618666 | 150619114 | 449    | 150618856 | 189  |

| Chr  | Start     | End       | Length | Summit    | Tags |
|------|-----------|-----------|--------|-----------|------|
| chr6 | 151044860 | 151045146 | 287    | 151044989 | 56   |
| chr6 | 151377267 | 151377754 | 488    | 151377442 | 39   |
| chr6 | 155576383 | 155576935 | 553    | 155576666 | 29   |
| chr6 | 157384231 | 157384851 | 621    | 157384516 | 34   |
| chr6 | 158105581 | 158105912 | 332    | 158105701 | 19   |
| chr6 | 158390556 | 158391187 | 632    | 158390822 | 476  |
| chr6 | 159097128 | 159097474 | 347    | 159097333 | 128  |
| chr6 | 159210537 | 159211200 | 664    | 159210759 | 109  |
| chr6 | 159238287 | 159238544 | 258    | 159238416 | 32   |
| chr6 | 160423727 | 160424161 | 435    | 160423879 | 38   |
| chr6 | 163068416 | 163069124 | 709    | 163068721 | 64   |
| chr6 | 163975596 | 163976078 | 483    | 163975854 | 64   |
| chr6 | 166960526 | 166961140 | 615    | 166960811 | 29   |
| chr6 | 167609031 | 167609255 | 225    | 167609143 | 16   |
| chr6 | 168201341 | 168201909 | 569    | 168201631 | 60   |
| chr6 | 169365995 | 169366563 | 569    | 169366366 | 103  |
| chr6 | 169397014 | 169397384 | 371    | 169397143 | 38   |
| chr6 | 170004829 | 170005500 | 672    | 170005026 | 115  |
| chr6 | 170183568 | 170184009 | 442    | 170183773 | 109  |
| chr6 | 170282076 | 170282348 | 273    | 170282221 | 41   |
| chr6 | 170376102 | 170376951 | 850    | 170376624 | 201  |
| chr7 | 491570    | 492140    | 571    | 491813    | 43   |
| chr7 | 496533    | 497145    | 613    | 496878    | 134  |
| chr7 | 502627    | 503113    | 487    | 502810    | 239  |
| chr7 | 517794    | 518569    | 776    | 518187    | 172  |
| chr7 | 545751    | 546503    | 753    | 546196    | 98   |
| chr7 | 619736    | 620284    | 549    | 619989    | 130  |
| chr7 | 704953    | 705461    | 509    | 705305    | 41   |
| chr7 | 951208    | 951758    | 551    | 951383    | 41   |
| chr7 | 999237    | 999927    | 691    | 999529    | 168  |
| chr7 | 1068558   | 1069022   | 465    | 1068685   | 22   |
| chr7 | 1071560   | 1072061   | 502    | 1071874   | 55   |
| chr7 | 1081943   | 1082568   | 626    | 1082170   | 84   |
| chr7 | 1458296   | 1458819   | 524    | 1458450   | 36   |
| chr7 | 1565676   | 1566665   | 990    | 1566083   | 165  |
| chr7 | 1892496   | 1893012   | 517    | 1892631   | 48   |
| chr7 | 1986006   | 1986680   | 675    | 1986365   | 63   |
| chr7 | 2007268   | 2008122   | 855    | 2007438   | 43   |
| chr7 | 2041227   | 2042806   | 1580   | 2041658   | 371  |
| chr7 | 2124818   | 2125362   | 545    | 2125004   | 58   |
| chr7 | 2175899   | 2176512   | 614    | 2176295   | 123  |
| chr7 | 2201890   | 2202260   | 371    | 2202067   | 56   |
| chr7 | 2378936   | 2379392   | 457    | 2379066   | 22   |
| chr7 | 2477461   | 2477986   | 526    | 2477683   | 74   |
| chr7 | 2529038   | 2530243   | 1206   | 2529770   | 452  |
| chr7 | 4183114   | 4183663   | 550    | 4183408   | 60   |
| chr7 | 4195190   | 4195748   | 559    | 4195368   | 45   |
| chr7 | 4688806   | 4689932   | 1127   | 4689612   | 127  |
| chr7 | 5051807   | 5052194   | 388    | 5052017   | 22   |
| chr7 | 5196059   | 5196645   | 587    | 5196281   | 74   |
| chr7 | 5403092   | 5403773   | 682    | 5403529   | 120  |
| chr7 | 5433841   | 5434800   | 960    | 5434186   | 59   |
| chr7 | 5435112   | 5435778   | 667    | 5435557   | 234  |



| <b>Chr</b> | <b>Start</b> | <b>End</b> | <b>Length</b> | <b>Summit</b> | <b>Tags</b> |
|------------|--------------|------------|---------------|---------------|-------------|
| chr7       | 5435923      | 5436616    | 694           | 5436402       | 173         |
| chr7       | 5601875      | 5602909    | 1035          | 5602460       | 140         |
| chr7       | 5614151      | 5614873    | 723           | 5614578       | 173         |
| chr7       | 6380129      | 6380933    | 805           | 6380470       | 57          |
| chr7       | 6405146      | 6405441    | 296           | 6405314       | 62          |
| chr7       | 6634301      | 6634643    | 343           | 6634483       | 48          |
| chr7       | 6712879      | 6713299    | 421           | 6713123       | 41          |
| chr7       | 6735724      | 6736322    | 599           | 6735919       | 125         |
| chr7       | 7188575      | 7188911    | 337           | 7188704       | 17          |
| chr7       | 8358126      | 8358701    | 576           | 8358354       | 24          |
| chr7       | 17702550     | 17702896   | 347           | 17702775      | 14          |
| chr7       | 23242121     | 23242449   | 329           | 23242289      | 150         |
| chr7       | 26805120     | 26805383   | 264           | 26805247      | 35          |
| chr7       | 27171328     | 27171878   | 551           | 27171679      | 45          |
| chr7       | 28415075     | 28415528   | 454           | 28415272      | 124         |
| chr7       | 28494264     | 28494530   | 267           | 28494406      | 22          |
| chr7       | 30034343     | 30034898   | 556           | 30034525      | 38          |
| chr7       | 30998529     | 30998895   | 367           | 30998712      | 159         |
| chr7       | 31065986     | 31066698   | 713           | 31066338      | 43          |
| chr7       | 31500609     | 31500947   | 339           | 31500831      | 38          |
| chr7       | 32501444     | 32501958   | 515           | 32501607      | 21          |
| chr7       | 34180953     | 34181647   | 695           | 34181268      | 33          |
| chr7       | 39955567     | 39956266   | 700           | 39955903      | 51          |
| chr7       | 40723439     | 40723774   | 336           | 40723599      | 141         |
| chr7       | 42204393     | 42204719   | 327           | 42204603      | 18          |
| chr7       | 43528537     | 43528863   | 327           | 43528705      | 87          |
| chr7       | 43583591     | 43583962   | 372           | 43583748      | 49          |
| chr7       | 43784668     | 43785285   | 618           | 43785012      | 47          |
| chr7       | 44108598     | 44109107   | 510           | 44108754      | 41          |
| chr7       | 44230452     | 44230913   | 462           | 44230752      | 29          |
| chr7       | 44314078     | 44314398   | 321           | 44314238      | 110         |
| chr7       | 44355253     | 44355580   | 328           | 44355381      | 20          |
| chr7       | 44802490     | 44802991   | 502           | 44802620      | 33          |
| chr7       | 44803535     | 44803820   | 286           | 44803663      | 60          |
| chr7       | 44965749     | 44966021   | 273           | 44965899      | 37          |
| chr7       | 45094857     | 45095490   | 634           | 45095179      | 52          |
| chr7       | 46167060     | 46167468   | 409           | 46167238      | 23          |
| chr7       | 47563933     | 47564468   | 536           | 47564208      | 62          |
| chr7       | 47641130     | 47641694   | 565           | 47641305      | 57          |
| chr7       | 48646588     | 48646879   | 292           | 48646724      | 67          |
| chr7       | 49876505     | 49876793   | 289           | 49876636      | 29          |
| chr7       | 50414285     | 50414626   | 342           | 50414435      | 101         |
| chr7       | 50698916     | 50699340   | 425           | 50699059      | 83          |
| chr7       | 50843725     | 50843999   | 275           | 50843869      | 30          |
| chr7       | 55450396     | 55450812   | 417           | 55450521      | 59          |
| chr7       | 55809922     | 55810254   | 333           | 55810059      | 110         |
| chr7       | 56044919     | 56045243   | 325           | 56045086      | 105         |
| chr7       | 63980052     | 63980704   | 653           | 63980337      | 64          |
| chr7       | 65462037     | 65462491   | 455           | 65462194      | 72          |
| chr7       | 71987650     | 71988204   | 555           | 71987828      | 85          |
| chr7       | 72006902     | 72007312   | 411           | 72007015      | 46          |
| chr7       | 72077407     | 72078336   | 930           | 72077970      | 103         |
| chr7       | 72206470     | 72207614   | 1145          | 72206912      | 104         |

| <b>Chr</b> | <b>Start</b> | <b>End</b> | <b>Length</b> | <b>Summit</b> | <b>Tags</b> |
|------------|--------------|------------|---------------|---------------|-------------|
| chr7       | 72890827     | 72891215   | 389           | 72891059      | 133         |
| chr7       | 72907492     | 72908059   | 568           | 72907905      | 130         |
| chr7       | 73364852     | 73365276   | 425           | 73365056      | 87          |
| chr7       | 74291240     | 74291735   | 496           | 74291445      | 68          |
| chr7       | 74705411     | 74705922   | 512           | 74705645      | 64          |
| chr7       | 74862351     | 74863083   | 733           | 74862779      | 94          |
| chr7       | 74953139     | 74953929   | 791           | 74953540      | 188         |
| chr7       | 74994815     | 74995706   | 892           | 74995414      | 331         |
| chr7       | 75573385     | 75573694   | 310           | 75573534      | 55          |
| chr7       | 75772243     | 75772738   | 496           | 75772419      | 28          |
| chr7       | 75952873     | 75953589   | 717           | 75953242      | 181         |
| chr7       | 76016322     | 76016926   | 605           | 76016570      | 92          |
| chr7       | 76195822     | 76196518   | 697           | 76196190      | 30          |
| chr7       | 76442204     | 76442692   | 489           | 76442333      | 40          |
| chr7       | 76450987     | 76451604   | 618           | 76451349      | 157         |
| chr7       | 76776120     | 76776554   | 435           | 76776329      | 91          |
| chr7       | 79601571     | 79602282   | 712           | 79601833      | 172         |
| chr7       | 84056246     | 84056567   | 322           | 84056437      | 42          |
| chr7       | 89678862     | 89679397   | 536           | 89679045      | 44          |
| chr7       | 92496223     | 92496677   | 455           | 92496497      | 117         |
| chr7       | 96052462     | 96052962   | 501           | 96052773      | 18          |
| chr7       | 96597590     | 96597984   | 395           | 96597831      | 63          |
| chr7       | 97501643     | 97502015   | 373           | 97501843      | 195         |
| chr7       | 98689984     | 98690370   | 387           | 98690181      | 49          |
| chr7       | 98940428     | 98941037   | 610           | 98940794      | 31          |
| chr7       | 99598697     | 99598974   | 278           | 99598821      | 31          |
| chr7       | 99707193     | 99708180   | 988           | 99707845      | 324         |
| chr7       | 99773784     | 99774037   | 254           | 99773911      | 32          |
| chr7       | 99944795     | 99945272   | 478           | 99945092      | 101         |
| chr7       | 100198955    | 100199557  | 603           | 100199281     | 42          |
| chr7       | 100263029    | 100263573  | 545           | 100263362     | 38          |
| chr7       | 100301527    | 100302264  | 738           | 100301916     | 58          |
| chr7       | 100303586    | 100304303  | 718           | 100303855     | 47          |
| chr7       | 100496024    | 100496463  | 440           | 100496332     | 27          |
| chr7       | 100514983    | 100515620  | 638           | 100515341     | 32          |
| chr7       | 100556784    | 100557249  | 466           | 100557009     | 64          |
| chr7       | 100671450    | 100671989  | 540           | 100671839     | 49          |
| chr7       | 100856696    | 100857024  | 329           | 100856856     | 95          |
| chr7       | 101060449    | 101061184  | 736           | 101060779     | 150         |
| chr7       | 101197566    | 101198073  | 508           | 101197766     | 28          |
| chr7       | 101581152    | 101581442  | 291           | 101581281     | 26          |
| chr7       | 101650487    | 101650818  | 332           | 101650655     | 36          |
| chr7       | 101790842    | 101791390  | 549           | 101791026     | 82          |
| chr7       | 101879121    | 101879477  | 357           | 101879296     | 128         |
| chr7       | 104498975    | 104499244  | 270           | 104499137     | 20          |
| chr7       | 104949789    | 104950121  | 333           | 104949908     | 21          |
| chr7       | 105492686    | 105493274  | 589           | 105493026     | 50          |
| chr7       | 107560184    | 107560552  | 369           | 107560310     | 23          |
| chr7       | 115012507    | 115012844  | 338           | 115012690     | 35          |
| chr7       | 115951918    | 115952530  | 613           | 115952176     | 30          |
| chr7       | 116099242    | 116099710  | 469           | 116099551     | 63          |
| chr7       | 116701329    | 116701557  | 229           | 116701443     | 22          |
| chr7       | 126016451    | 126016940  | 490           | 126016792     | 20          |

| Chr  | Start     | End       | Length | Summit    | Tags |
|------|-----------|-----------|--------|-----------|------|
| chr7 | 129800783 | 129801365 | 583    | 129801159 | 244  |
| chr7 | 130523645 | 130524140 | 496    | 130523829 | 66   |
| chr7 | 131591217 | 131591547 | 331    | 131591416 | 47   |
| chr7 | 131654122 | 131654428 | 307    | 131654288 | 42   |
| chr7 | 133896892 | 133897179 | 288    | 133897054 | 23   |
| chr7 | 134523654 | 134524012 | 359    | 134523824 | 66   |
| chr7 | 134528388 | 134528923 | 536    | 134528555 | 70   |
| chr7 | 134671039 | 134671320 | 282    | 134671186 | 31   |
| chr7 | 138370850 | 138371642 | 793    | 138371178 | 46   |
| chr7 | 138990575 | 138990946 | 372    | 138990712 | 59   |
| chr7 | 140042948 | 140043520 | 573    | 140043232 | 70   |
| chr7 | 142261991 | 142262328 | 338    | 142262141 | 28   |
| chr7 | 148418496 | 148419115 | 620    | 148418952 | 36   |
| chr7 | 148454249 | 148454731 | 483    | 148454433 | 38   |
| chr7 | 148561480 | 148561835 | 356    | 148561704 | 80   |
| chr7 | 149042303 | 149043203 | 901    | 149042670 | 64   |
| chr7 | 149695938 | 149696451 | 514    | 149696122 | 37   |
| chr7 | 150271820 | 150272422 | 603    | 150272217 | 175  |
| chr7 | 150272613 | 150273242 | 630    | 150272872 | 84   |
| chr7 | 150379059 | 150379362 | 304    | 150379213 | 34   |
| chr7 | 150442376 | 150443037 | 662    | 150442626 | 126  |
| chr7 | 150444182 | 150444563 | 382    | 150444363 | 151  |
| chr7 | 150472907 | 150473211 | 305    | 150473032 | 22   |
| chr7 | 150847477 | 150848590 | 1114   | 150847782 | 44   |
| chr7 | 151015964 | 151016603 | 640    | 151016249 | 109  |
| chr7 | 151024083 | 151024780 | 698    | 151024501 | 218  |
| chr7 | 151223361 | 151223636 | 276    | 151223487 | 25   |
| chr7 | 155274391 | 155274992 | 602    | 155274715 | 97   |
| chr7 | 155436937 | 155437466 | 530    | 155437118 | 47   |
| chr7 | 155973566 | 155973809 | 244    | 155973688 | 20   |
| chr7 | 156378313 | 156378752 | 440    | 156378554 | 36   |
| chr7 | 156624052 | 156624648 | 597    | 156624280 | 38   |
| chr7 | 156785536 | 156785856 | 321    | 156785708 | 31   |
| chr7 | 156803230 | 156803747 | 518    | 156803586 | 43   |
| chr7 | 157811073 | 157811547 | 475    | 157811202 | 22   |
| chr7 | 157888743 | 157888987 | 245    | 157888865 | 17   |
| chr7 | 157889943 | 157890343 | 401    | 157890094 | 27   |
| chr7 | 158208720 | 158209405 | 686    | 158209046 | 52   |
| chr7 | 158303985 | 158304569 | 585    | 158304367 | 50   |
| chr7 | 158512946 | 158513592 | 647    | 158513335 | 88   |
| chr8 | 639621    | 640792    | 1172   | 640271    | 317  |
| chr8 | 657635    | 658067    | 433    | 657885    | 104  |
| chr8 | 1765062   | 1765612   | 551    | 1765438   | 54   |
| chr8 | 3044495   | 3044746   | 252    | 3044621   | 11   |
| chr8 | 8365850   | 8366589   | 740    | 8366212   | 36   |
| chr8 | 8559960   | 8560298   | 339    | 8560157   | 95   |
| chr8 | 10606012  | 10606429  | 418    | 10606231  | 254  |
| chr8 | 11094891  | 11095591  | 701    | 11095275  | 38   |
| chr8 | 11620489  | 11620945  | 457    | 11620800  | 60   |
| chr8 | 18998182  | 18998482  | 301    | 18998322  | 102  |
| chr8 | 19759809  | 19760160  | 352    | 19760006  | 37   |
| chr8 | 20042554  | 20043044  | 491    | 20042749  | 24   |
| chr8 | 22015046  | 22016038  | 993    | 22015476  | 150  |

| <b>Chr</b> | <b>Start</b> | <b>End</b> | <b>Length</b> | <b>Summit</b> | <b>Tags</b> |
|------------|--------------|------------|---------------|---------------|-------------|
| chr8       | 22044360     | 22044832   | 473           | 22044546      | 32          |
| chr8       | 22054171     | 22054866   | 696           | 22054353      | 114         |
| chr8       | 22060824     | 22061436   | 613           | 22061049      | 67          |
| chr8       | 22547677     | 22547990   | 314           | 22547852      | 45          |
| chr8       | 22632400     | 22633145   | 746           | 22632775      | 63          |
| chr8       | 22927853     | 22928421   | 569           | 22928039      | 114         |
| chr8       | 22981803     | 22982482   | 680           | 22982091      | 106         |
| chr8       | 23016399     | 23016914   | 516           | 23016734      | 38          |
| chr8       | 23076734     | 23077467   | 734           | 23077129      | 174         |
| chr8       | 25573648     | 25574102   | 455           | 25573937      | 24          |
| chr8       | 27254038     | 27254447   | 410           | 27254201      | 26          |
| chr8       | 27275411     | 27275733   | 323           | 27275580      | 24          |
| chr8       | 27586490     | 27586963   | 474           | 27586827      | 31          |
| chr8       | 28357686     | 28358147   | 462           | 28357811      | 31          |
| chr8       | 29584991     | 29585300   | 310           | 29585146      | 81          |
| chr8       | 37512174     | 37512503   | 330           | 37512347      | 51          |
| chr8       | 37876146     | 37876586   | 441           | 37876369      | 21          |
| chr8       | 38711308     | 38711653   | 346           | 38711496      | 58          |
| chr8       | 38913706     | 38914111   | 406           | 38913935      | 52          |
| chr8       | 41132855     | 41133445   | 591           | 41133104      | 30          |
| chr8       | 42116425     | 42117139   | 715           | 42116750      | 122         |
| chr8       | 42266562     | 42267182   | 621           | 42266994      | 43          |
| chr8       | 42870644     | 42871372   | 729           | 42870984      | 66          |
| chr8       | 48456656     | 48457020   | 365           | 48456852      | 121         |
| chr8       | 48898174     | 48898496   | 323           | 48898366      | 64          |
| chr8       | 49576395     | 49576861   | 467           | 49576526      | 35          |
| chr8       | 49734450     | 49735020   | 571           | 49734626      | 146         |
| chr8       | 49771260     | 49771820   | 561           | 49771615      | 202         |
| chr8       | 49779213     | 49779751   | 539           | 49779563      | 320         |
| chr8       | 49783891     | 49784591   | 701           | 49784379      | 332         |
| chr8       | 49939903     | 49940413   | 511           | 49940242      | 77          |
| chr8       | 49945175     | 49945866   | 692           | 49945548      | 200         |
| chr8       | 49998451     | 49998881   | 431           | 49998590      | 44          |
| chr8       | 54604425     | 54604766   | 342           | 54604602      | 159         |
| chr8       | 55020695     | 55021061   | 367           | 55020924      | 47          |
| chr8       | 55032318     | 55033008   | 691           | 55032639      | 81          |
| chr8       | 55176781     | 55177209   | 429           | 55177034      | 85          |
| chr8       | 62789348     | 62790125   | 778           | 62789690      | 94          |
| chr8       | 67023288     | 67023785   | 498           | 67023490      | 86          |
| chr8       | 67188267     | 67188839   | 573           | 67188447      | 131         |
| chr8       | 67199042     | 67199386   | 345           | 67199226      | 143         |
| chr8       | 71743724     | 71744305   | 582           | 71744083      | 17          |
| chr8       | 74487170     | 74487509   | 340           | 74487327      | 38          |
| chr8       | 75476755     | 75477387   | 633           | 75477029      | 17          |
| chr8       | 82354937     | 82355527   | 591           | 82355138      | 117         |
| chr8       | 95801032     | 95801527   | 496           | 95801174      | 49          |
| chr8       | 96030565     | 96031145   | 581           | 96030943      | 51          |
| chr8       | 96282373     | 96282649   | 277           | 96282500      | 38          |
| chr8       | 96854513     | 96854769   | 257           | 96854641      | 21          |
| chr8       | 101185398    | 101185858  | 461           | 101185627     | 31          |
| chr8       | 101803657    | 101804353  | 697           | 101804119     | 52          |
| chr8       | 102518317    | 102518813  | 497           | 102518668     | 115         |
| chr8       | 102972947    | 102973696  | 750           | 102973356     | 57          |

| Chr  | Start     | End       | Length | Summit    | Tags |
|------|-----------|-----------|--------|-----------|------|
| chr8 | 103320481 | 103320932 | 452    | 103320666 | 40   |
| chr8 | 103767304 | 103767538 | 235    | 103767421 | 19   |
| chr8 | 104379995 | 104380642 | 648    | 104380230 | 158  |
| chr8 | 104582040 | 104582675 | 636    | 104582299 | 65   |
| chr8 | 107168650 | 107168924 | 275    | 107168802 | 32   |
| chr8 | 110620786 | 110621341 | 556    | 110620953 | 69   |
| chr8 | 116943631 | 116943883 | 253    | 116943757 | 40   |
| chr8 | 117847665 | 117848158 | 494    | 117847849 | 111  |
| chr8 | 119027844 | 119028126 | 283    | 119027971 | 36   |
| chr8 | 123943898 | 123944487 | 590    | 123944271 | 111  |
| chr8 | 123980132 | 123980448 | 317    | 123980318 | 64   |
| chr8 | 125938100 | 125938566 | 467    | 125938390 | 137  |
| chr8 | 126079522 | 126080295 | 774    | 126079934 | 43   |
| chr8 | 126511324 | 126511730 | 407    | 126511453 | 48   |
| chr8 | 127661437 | 127661797 | 361    | 127661590 | 77   |
| chr8 | 128752226 | 128752575 | 350    | 128752381 | 36   |
| chr8 | 130930115 | 130930381 | 267    | 130930256 | 35   |
| chr8 | 131066538 | 131066964 | 427    | 131066718 | 42   |
| chr8 | 134378557 | 134379087 | 531    | 134378748 | 39   |
| chr8 | 134410096 | 134410485 | 390    | 134410326 | 43   |
| chr8 | 134440246 | 134440699 | 454    | 134440543 | 93   |
| chr8 | 135772752 | 135773025 | 274    | 135772895 | 38   |
| chr8 | 139937295 | 139937810 | 516    | 139937652 | 52   |
| chr8 | 142134642 | 142135223 | 582    | 142134990 | 74   |
| chr8 | 142207297 | 142207841 | 545    | 142207618 | 37   |
| chr8 | 142252341 | 142253052 | 712    | 142252712 | 57   |
| chr8 | 142253147 | 142253708 | 562    | 142253343 | 95   |
| chr8 | 142304674 | 142305263 | 590    | 142304866 | 148  |
| chr8 | 142361892 | 142362425 | 534    | 142362253 | 69   |
| chr8 | 143384832 | 143385502 | 671    | 143385142 | 44   |
| chr8 | 143460839 | 143461906 | 1068   | 143461400 | 96   |
| chr8 | 143622663 | 143623124 | 462    | 143622866 | 55   |
| chr8 | 143893933 | 143894680 | 748    | 143894270 | 247  |
| chr8 | 144166255 | 144166876 | 622    | 144166519 | 75   |
| chr8 | 144281563 | 144282027 | 465    | 144281864 | 76   |
| chr8 | 144373729 | 144374282 | 554    | 144374122 | 45   |
| chr8 | 144485242 | 144486107 | 866    | 144485709 | 84   |
| chr8 | 144538307 | 144538925 | 619    | 144538727 | 105  |
| chr8 | 144887602 | 144888381 | 780    | 144888014 | 162  |
| chr8 | 144892434 | 144893269 | 836    | 144892826 | 334  |
| chr8 | 144927456 | 144927661 | 206    | 144927559 | 37   |
| chr8 | 144990307 | 144990870 | 564    | 144990708 | 138  |
| chr8 | 145052060 | 145052532 | 473    | 145052379 | 60   |
| chr8 | 145082299 | 145083159 | 861    | 145082803 | 117  |
| chr8 | 145085503 | 145086654 | 1152   | 145086233 | 203  |
| chr8 | 145131884 | 145132399 | 516    | 145132055 | 52   |
| chr8 | 145506593 | 145507299 | 707    | 145506942 | 95   |
| chr8 | 145644207 | 145644884 | 678    | 145644611 | 154  |
| chr8 | 145651316 | 145651843 | 528    | 145651630 | 46   |
| chr8 | 145747461 | 145748016 | 556    | 145747656 | 47   |
| chr8 | 146002054 | 146002591 | 538    | 146002416 | 35   |
| chr9 | 436108    | 436411    | 304    | 436267    | 32   |
| chr9 | 460078    | 460508    | 431    | 460297    | 154  |

| <b>Chr</b> | <b>Start</b> | <b>End</b> | <b>Length</b> | <b>Summit</b> | <b>Tags</b> |
|------------|--------------|------------|---------------|---------------|-------------|
| chr9       | 597444       | 597772     | 329           | 597644        | 20          |
| chr9       | 4778847      | 4779088    | 242           | 4778968       | 18          |
| chr9       | 5619341      | 5619896    | 556           | 5619708       | 75          |
| chr9       | 5997054      | 5998065    | 1012          | 5997794       | 52          |
| chr9       | 15112322     | 15112661   | 340           | 15112428      | 29          |
| chr9       | 15297141     | 15297471   | 331           | 15297305      | 38          |
| chr9       | 16134406     | 16134841   | 436           | 16134700      | 44          |
| chr9       | 16520667     | 16520977   | 311           | 16520833      | 108         |
| chr9       | 19454724     | 19455207   | 484           | 19455059      | 76          |
| chr9       | 20673896     | 20674611   | 716           | 20674247      | 31          |
| chr9       | 23811301     | 23811963   | 663           | 23811615      | 46          |
| chr9       | 25667457     | 25667973   | 517           | 25667594      | 33          |
| chr9       | 25668241     | 25668820   | 580           | 25668621      | 52          |
| chr9       | 33156885     | 33157841   | 957           | 33157685      | 189         |
| chr9       | 33254395     | 33254993   | 599           | 33254686      | 35          |
| chr9       | 33408067     | 33408550   | 484           | 33408322      | 159         |
| chr9       | 33438268     | 33438727   | 460           | 33438397      | 26          |
| chr9       | 33454262     | 33454576   | 315           | 33454428      | 100         |
| chr9       | 33550125     | 33550588   | 464           | 33550359      | 76          |
| chr9       | 34062460     | 34062735   | 276           | 34062589      | 18          |
| chr9       | 34366732     | 34367346   | 615           | 34367155      | 189         |
| chr9       | 35061725     | 35062479   | 755           | 35062082      | 66          |
| chr9       | 35895931     | 35896615   | 685           | 35896136      | 197         |
| chr9       | 36848719     | 36849302   | 584           | 36848900      | 48          |
| chr9       | 38014280     | 38014684   | 405           | 38014443      | 66          |
| chr9       | 38086032     | 38086591   | 560           | 38086407      | 90          |
| chr9       | 38490152     | 38490548   | 397           | 38490334      | 121         |
| chr9       | 38573798     | 38574092   | 295           | 38573966      | 43          |
| chr9       | 39278175     | 39278506   | 332           | 39278350      | 144         |
| chr9       | 39807255     | 39807843   | 589           | 39807593      | 153         |
| chr9       | 40623195     | 40623890   | 696           | 40623580      | 163         |
| chr9       | 40781194     | 40781645   | 452           | 40781443      | 23          |
| chr9       | 41423299     | 41423916   | 618           | 41423607      | 154         |
| chr9       | 41598635     | 41599078   | 444           | 41598851      | 17          |
| chr9       | 43624704     | 43625383   | 680           | 43625008      | 152         |
| chr9       | 65316266     | 65316955   | 690           | 65316575      | 213         |
| chr9       | 73588010     | 73588310   | 301           | 73588140      | 64          |
| chr9       | 74937115     | 74937339   | 225           | 74937227      | 13          |
| chr9       | 80093252     | 80093571   | 320           | 80093408      | 30          |
| chr9       | 80101924     | 80102540   | 617           | 80102237      | 21          |
| chr9       | 83825926     | 83826286   | 361           | 83826114      | 17          |
| chr9       | 84834311     | 84834541   | 231           | 84834426      | 43          |
| chr9       | 87318954     | 87319324   | 371           | 87319084      | 40          |
| chr9       | 90737598     | 90737840   | 243           | 90737719      | 15          |
| chr9       | 91490923     | 91491242   | 320           | 91491112      | 67          |
| chr9       | 91816450     | 91816770   | 321           | 91816641      | 20          |
| chr9       | 92723201     | 92723683   | 483           | 92723418      | 92          |
| chr9       | 92744687     | 92745065   | 379           | 92744896      | 203         |
| chr9       | 92772758     | 92773154   | 397           | 92772941      | 121         |
| chr9       | 93949405     | 93950162   | 758           | 93949559      | 156         |
| chr9       | 94413765     | 94414200   | 436           | 94413929      | 49          |
| chr9       | 94517839     | 94518408   | 570           | 94518061      | 54          |
| chr9       | 97307823     | 97308104   | 282           | 97307978      | 53          |

| Chr  | Start     | End       | Length | Summit    | Tags |
|------|-----------|-----------|--------|-----------|------|
| chr9 | 97988769  | 97989065  | 297    | 97988905  | 53   |
| chr9 | 98891448  | 98891834  | 387    | 98891664  | 92   |
| chr9 | 98970164  | 98970630  | 467    | 98970496  | 73   |
| chr9 | 99435061  | 99435375  | 315    | 99435210  | 46   |
| chr9 | 99889657  | 99890280  | 624    | 99889976  | 235  |
| chr9 | 99964838  | 99965155  | 318    | 99965002  | 88   |
| chr9 | 99994594  | 99995281  | 688    | 99994939  | 60   |
| chr9 | 108662253 | 108662609 | 357    | 108662454 | 100  |
| chr9 | 109143331 | 109143557 | 227    | 109143444 | 26   |
| chr9 | 109443960 | 109444400 | 441    | 109444302 | 31   |
| chr9 | 111251478 | 111251926 | 449    | 111251666 | 120  |
| chr9 | 111300040 | 111300767 | 728    | 111300415 | 37   |
| chr9 | 112593297 | 112593921 | 625    | 112593647 | 25   |
| chr9 | 113433157 | 113433734 | 578    | 113433452 | 32   |
| chr9 | 114134905 | 114135475 | 571    | 114135080 | 99   |
| chr9 | 115873108 | 115873724 | 617    | 115873470 | 55   |
| chr9 | 115965516 | 115965847 | 332    | 115965702 | 20   |
| chr9 | 115974915 | 115975424 | 510    | 115975113 | 44   |
| chr9 | 116080956 | 116081411 | 456    | 116081131 | 128  |
| chr9 | 116275005 | 116275342 | 338    | 116275151 | 80   |
| chr9 | 116523572 | 116523820 | 249    | 116523696 | 24   |
| chr9 | 118489118 | 118489706 | 589    | 118489335 | 344  |
| chr9 | 118658336 | 118658623 | 288    | 118658492 | 133  |
| chr9 | 122696571 | 122696953 | 383    | 122696733 | 24   |
| chr9 | 122737440 | 122737878 | 439    | 122737706 | 36   |
| chr9 | 123502185 | 123502706 | 522    | 123502520 | 129  |
| chr9 | 123502825 | 123503138 | 314    | 123502983 | 43   |
| chr9 | 125800071 | 125800348 | 278    | 125800191 | 35   |
| chr9 | 125847263 | 125847664 | 402    | 125847411 | 23   |
| chr9 | 125867241 | 125867777 | 537    | 125867568 | 31   |
| chr9 | 126104947 | 126105350 | 404    | 126105225 | 68   |
| chr9 | 126702097 | 126702440 | 344    | 126702243 | 34   |
| chr9 | 126991503 | 126992207 | 705    | 126992024 | 59   |
| chr9 | 127509225 | 127509617 | 393    | 127509487 | 33   |
| chr9 | 127772273 | 127772815 | 543    | 127772566 | 51   |
| chr9 | 129163468 | 129163965 | 498    | 129163791 | 37   |
| chr9 | 129337068 | 129337464 | 397    | 129337226 | 79   |
| chr9 | 129368358 | 129368748 | 391    | 129368554 | 147  |
| chr9 | 129524984 | 129525521 | 538    | 129525349 | 33   |
| chr9 | 130704337 | 130705100 | 764    | 130704693 | 207  |
| chr9 | 130904938 | 130905712 | 775    | 130905319 | 255  |
| chr9 | 131080508 | 131080983 | 476    | 131080700 | 258  |
| chr9 | 131134184 | 131134603 | 420    | 131134398 | 135  |
| chr9 | 131185480 | 131186090 | 611    | 131185832 | 31   |
| chr9 | 131448326 | 131448678 | 353    | 131448518 | 55   |
| chr9 | 131553863 | 131554417 | 555    | 131554146 | 113  |
| chr9 | 131625816 | 131626415 | 600    | 131626189 | 63   |
| chr9 | 132014527 | 132015049 | 523    | 132014772 | 73   |
| chr9 | 132292155 | 132292817 | 663    | 132292364 | 213  |
| chr9 | 132296333 | 132296871 | 539    | 132296628 | 43   |
| chr9 | 132978649 | 132979127 | 479    | 132979001 | 24   |
| chr9 | 133131198 | 133131727 | 530    | 133131584 | 75   |
| chr9 | 133543799 | 133544060 | 262    | 133543930 | 20   |

| Chr  | Start     | End       | Length | Summit    | Tags |
|------|-----------|-----------|--------|-----------|------|
| chr9 | 134495960 | 134496379 | 420    | 134496188 | 116  |
| chr9 | 134933208 | 134933490 | 283    | 134933330 | 40   |
| chr9 | 134998479 | 134999437 | 959    | 134999008 | 236  |
| chr9 | 135728756 | 135729525 | 770    | 135729205 | 158  |
| chr9 | 135731617 | 135732364 | 748    | 135731953 | 50   |
| chr9 | 135735912 | 135736520 | 609    | 135736269 | 104  |
| chr9 | 135736734 | 135737270 | 537    | 135737097 | 66   |
| chr9 | 135799526 | 135800059 | 534    | 135799840 | 174  |
| chr9 | 136002055 | 136002389 | 335    | 136002214 | 47   |
| chr9 | 136265715 | 136266241 | 527    | 136265920 | 45   |
| chr9 | 136355657 | 136356035 | 379    | 136355851 | 51   |
| chr9 | 136361509 | 136362112 | 604    | 136361887 | 48   |
| chr9 | 136403154 | 136403956 | 803    | 136403549 | 255  |
| chr9 | 136411409 | 136412296 | 888    | 136411854 | 286  |
| chr9 | 136438593 | 136439345 | 753    | 136439095 | 32   |
| chr9 | 136443981 | 136444408 | 428    | 136444240 | 33   |
| chr9 | 136463888 | 136464673 | 786    | 136464285 | 141  |
| chr9 | 136796599 | 136796936 | 338    | 136796740 | 29   |
| chr9 | 136858366 | 136859189 | 824    | 136858803 | 178  |
| chr9 | 137273427 | 137273883 | 457    | 137273558 | 51   |
| chr9 | 137920402 | 137921026 | 625    | 137920599 | 66   |
| chr9 | 137922959 | 137923393 | 435    | 137923117 | 22   |
| chr9 | 137983573 | 137983961 | 389    | 137983780 | 157  |
| chr9 | 138082386 | 138082942 | 557    | 138082576 | 123  |
| chr9 | 138139915 | 138140581 | 667    | 138140225 | 141  |
| chr9 | 138141085 | 138141847 | 763    | 138141507 | 370  |
| chr9 | 138230194 | 138230938 | 745    | 138230595 | 119  |
| chr9 | 138257586 | 138258292 | 707    | 138257909 | 87   |
| chr9 | 138414216 | 138414738 | 523    | 138414536 | 29   |
| chr9 | 138611444 | 138612045 | 602    | 138611725 | 28   |
| chr9 | 138635169 | 138635854 | 686    | 138635476 | 145  |
| chr9 | 138637114 | 138637724 | 611    | 138637497 | 31   |
| chr9 | 138637747 | 138638864 | 1118   | 138638351 | 428  |
| chr9 | 138649900 | 138650225 | 326    | 138650084 | 31   |
| chr9 | 138711589 | 138712002 | 414    | 138711778 | 135  |
| chr9 | 139098847 | 139099197 | 351    | 139099064 | 67   |
| chr9 | 139255630 | 139256105 | 476    | 139255977 | 45   |
| chr9 | 139286443 | 139287091 | 649    | 139286795 | 85   |
| chr9 | 139288157 | 139288800 | 644    | 139288469 | 132  |
| chr9 | 139317429 | 139317805 | 377    | 139317592 | 38   |
| chr9 | 139828134 | 139829071 | 938    | 139828703 | 98   |
| chrX | 256230    | 256870    | 641    | 256552    | 26   |
| chrX | 8660134   | 8660689   | 556    | 8660508   | 40   |
| chrX | 9693070   | 9693824   | 755    | 9693414   | 134  |
| chrX | 9735896   | 9736173   | 278    | 9736026   | 27   |
| chrX | 9840196   | 9840736   | 541    | 9840498   | 41   |
| chrX | 17302813  | 17303280  | 468    | 17302938  | 21   |
| chrX | 17475776  | 17476153  | 378    | 17475947  | 87   |
| chrX | 22050682  | 22050973  | 292    | 22050812  | 20   |
| chrX | 24943746  | 24944129  | 384    | 24943998  | 23   |
| chrX | 30734470  | 30734709  | 240    | 30734590  | 12   |
| chrX | 34181182  | 34181656  | 475    | 34181479  | 21   |
| chrX | 38071661  | 38071962  | 302    | 38071789  | 16   |



| <b>Chr</b> | <b>Start</b> | <b>End</b> | <b>Length</b> | <b>Summit</b> | <b>Tags</b> |
|------------|--------------|------------|---------------|---------------|-------------|
| chrX       | 38548103     | 38548425   | 323           | 38548235      | 31          |
| chrX       | 39889205     | 39889589   | 385           | 39889392      | 119         |
| chrX       | 40325074     | 40325445   | 372           | 40325188      | 11          |
| chrX       | 42920944     | 42921220   | 277           | 42921073      | 24          |
| chrX       | 43398718     | 43399363   | 646           | 43399099      | 23          |
| chrX       | 44419586     | 44419912   | 327           | 44419758      | 82          |
| chrX       | 46399996     | 46400559   | 564           | 46400195      | 26          |
| chrX       | 46935408     | 46936033   | 626           | 46935782      | 60          |
| chrX       | 48633727     | 48634404   | 678           | 48634092      | 30          |
| chrX       | 48659431     | 48659821   | 391           | 48659635      | 79          |
| chrX       | 48909629     | 48910124   | 496           | 48909997      | 25          |
| chrX       | 48910298     | 48910707   | 410           | 48910549      | 68          |
| chrX       | 48920212     | 48920632   | 421           | 48920446      | 51          |
| chrX       | 48927940     | 48928433   | 494           | 48928237      | 126         |
| chrX       | 49711637     | 49712113   | 477           | 49711986      | 26          |
| chrX       | 51982084     | 51982722   | 639           | 51982431      | 33          |
| chrX       | 53179363     | 53179688   | 326           | 53179527      | 52          |
| chrX       | 53314155     | 53314366   | 212           | 53314261      | 15          |
| chrX       | 54242507     | 54242869   | 363           | 54242738      | 12          |
| chrX       | 54339851     | 54340086   | 236           | 54339969      | 13          |
| chrX       | 56818675     | 56819092   | 418           | 56818816      | 33          |
| chrX       | 56856676     | 56856916   | 241           | 56856796      | 11          |
| chrX       | 57635011     | 57635489   | 479           | 57635142      | 47          |
| chrX       | 57953251     | 57953758   | 508           | 57953620      | 51          |
| chrX       | 64781577     | 64781841   | 265           | 64781694      | 13          |
| chrX       | 67974497     | 67974859   | 363           | 67974682      | 32          |
| chrX       | 67981013     | 67981343   | 331           | 67981200      | 48          |
| chrX       | 68015589     | 68015984   | 396           | 68015780      | 84          |
| chrX       | 68252755     | 68253118   | 364           | 68252940      | 71          |
| chrX       | 68358638     | 68358955   | 318           | 68358831      | 17          |
| chrX       | 69399572     | 69399885   | 314           | 69399732      | 23          |
| chrX       | 71449145     | 71449477   | 333           | 71449339      | 34          |
| chrX       | 73672420     | 73672725   | 306           | 73672553      | 15          |
| chrX       | 74324991     | 74325359   | 369           | 74325150      | 13          |
| chrX       | 77245894     | 77246494   | 601           | 77246210      | 25          |
| chrX       | 80983499     | 80983985   | 487           | 80983756      | 28          |
| chrX       | 84249047     | 84249469   | 423           | 84249299      | 40          |
| chrX       | 84249852     | 84250198   | 347           | 84250013      | 18          |
| chrX       | 85436490     | 85436764   | 275           | 85436635      | 15          |
| chrX       | 95204912     | 95205189   | 278           | 95205034      | 13          |
| chrX       | 102583521    | 102583840  | 320           | 102583721     | 15          |
| chrX       | 104081722    | 104082022  | 301           | 104081874     | 17          |
| chrX       | 106129954    | 106130385  | 432           | 106130281     | 14          |
| chrX       | 106285904    | 106286383  | 480           | 106286068     | 14          |
| chrX       | 110779560    | 110779849  | 290           | 110779730     | 19          |
| chrX       | 111948610    | 111948945  | 336           | 111948791     | 17          |
| chrX       | 120785013    | 120785318  | 306           | 120785169     | 28          |
| chrX       | 127744495    | 127744989  | 495           | 127744771     | 15          |
| chrX       | 128804925    | 128805542  | 618           | 128805163     | 42          |
| chrX       | 128922946    | 128923225  | 280           | 128923100     | 27          |
| chrX       | 129072243    | 129073250  | 1008          | 129073037     | 160         |
| chrX       | 133983880    | 133984376  | 497           | 133984009     | 23          |
| chrX       | 134013357    | 134014039  | 683           | 134013647     | 44          |

| Chr  | Start     | End       | Length | Summit    | Tags |
|------|-----------|-----------|--------|-----------|------|
| chrX | 146800784 | 146801296 | 513    | 146800940 | 63   |
| chrX | 148858106 | 148858630 | 525    | 148858285 | 28   |
| chrX | 149283249 | 149283518 | 270    | 149283373 | 14   |
| chrX | 150306025 | 150306319 | 295    | 150306156 | 31   |
| chrX | 150310864 | 150311180 | 317    | 150310993 | 20   |
| chrX | 151798585 | 151799112 | 528    | 151798737 | 117  |
| chrX | 152360663 | 152360958 | 296    | 152360806 | 65   |
| chrX | 152399990 | 152400421 | 432    | 152400171 | 14   |
| chrX | 152408853 | 152409296 | 444    | 152409133 | 38   |
| chrX | 152430492 | 152430804 | 313    | 152430620 | 18   |
| chrX | 152445724 | 152446174 | 451    | 152446047 | 18   |
| chrX | 152556931 | 152557443 | 513    | 152557209 | 41   |
| chrX | 152622856 | 152623231 | 376    | 152623054 | 24   |
| chrX | 152642013 | 152642626 | 614    | 152642169 | 58   |
| chrX | 152658334 | 152658785 | 452    | 152658504 | 88   |
| chrX | 152682658 | 152682989 | 332    | 152682842 | 78   |
| chrX | 152697367 | 152697747 | 381    | 152697565 | 89   |
| chrX | 152712671 | 152713239 | 569    | 152713000 | 109  |
| chrX | 152724180 | 152724631 | 452    | 152724298 | 15   |
| chrX | 152846770 | 152847320 | 551    | 152847082 | 17   |
| chrX | 153255150 | 153255684 | 535    | 153255326 | 55   |
| chrX | 153325806 | 153326252 | 447    | 153325977 | 27   |
| chrX | 153767022 | 153767501 | 480    | 153767279 | 25   |
| chrX | 154097741 | 154098003 | 263    | 154097872 | 41   |
| chrX | 154264219 | 154264528 | 310    | 154264400 | 18   |
| chrX | 154341759 | 154342202 | 444    | 154342030 | 40   |
| chrY | 256230    | 256784    | 555    | 256552    | 27   |
| chrY | 14324639  | 14325200  | 562    | 14324930  | 21   |
| chrY | 15146569  | 15146904  | 336    | 15146695  | 15   |
| chr1 | 965771    | 966239    | 469    | 965940    | 40   |
| chr1 | 1580322   | 1580991   | 670    | 1580651   | 31   |
| chr1 | 1645602   | 1646089   | 488    | 1645941   | 27   |
| chr1 | 3504467   | 3505138   | 672    | 3504807   | 47   |
| chr1 | 6901177   | 6901595   | 419    | 6901443   | 37   |
| chr1 | 10889845  | 10890178  | 334    | 10890033  | 41   |
| chr1 | 11963853  | 11964194  | 342    | 11964070  | 36   |
| chr1 | 12001546  | 12002298  | 753    | 12001910  | 40   |
| chr1 | 15556315  | 15556683  | 369    | 15556443  | 25   |
| chr1 | 16358391  | 16358715  | 325    | 16358510  | 19   |
| chr1 | 17444327  | 17444693  | 367    | 17444519  | 56   |
| chr1 | 18149874  | 18150176  | 303    | 18150045  | 41   |
| chr1 | 22206291  | 22206620  | 330    | 22206491  | 23   |
| chr1 | 23990884  | 23991221  | 338    | 23991058  | 24   |
| chr1 | 25438941  | 25439387  | 447    | 25439274  | 16   |
| chr1 | 26891555  | 26891816  | 262    | 26891686  | 33   |
| chr1 | 27704275  | 27704651  | 377    | 27704402  | 25   |
| chr1 | 31183659  | 31183970  | 312    | 31183774  | 23   |
| chr1 | 31293044  | 31293406  | 363    | 31293241  | 21   |
| chr1 | 31416284  | 31416514  | 231    | 31416399  | 27   |
| chr1 | 34809509  | 34810214  | 706    | 34809833  | 24   |
| chr1 | 36400275  | 36400621  | 347    | 36400466  | 37   |
| chr1 | 37693145  | 37693571  | 427    | 37693362  | 48   |
| chr1 | 38889934  | 38890227  | 294    | 38890104  | 20   |

| <b>Chr</b> | <b>Start</b> | <b>End</b> | <b>Length</b> | <b>Summit</b> | <b>Tags</b> |
|------------|--------------|------------|---------------|---------------|-------------|
| chr1       | 42701321     | 42701711   | 391           | 42701552      | 18          |
| chr1       | 43191537     | 43191892   | 356           | 43191695      | 31          |
| chr1       | 44074777     | 44075105   | 329           | 44074976      | 29          |
| chr1       | 45013465     | 45013923   | 459           | 45013596      | 35          |
| chr1       | 45851511     | 45851799   | 289           | 45851673      | 26          |
| chr1       | 48388693     | 48389178   | 486           | 48388833      | 27          |
| chr1       | 49244405     | 49245076   | 672           | 49244726      | 24          |
| chr1       | 66510242     | 66510542   | 301           | 66510412      | 34          |
| chr1       | 72126584     | 72127262   | 679           | 72126929      | 29          |
| chr1       | 79089185     | 79089608   | 424           | 79089333      | 17          |
| chr1       | 79754792     | 79755426   | 635           | 79755106      | 21          |
| chr1       | 84824108     | 84824368   | 261           | 84824238      | 27          |
| chr1       | 94034017     | 94034483   | 467           | 94034354      | 14          |
| chr1       | 105193439    | 105193914  | 476           | 105193552     | 17          |
| chr1       | 112663852    | 112664105  | 254           | 112663979     | 21          |
| chr1       | 116900852    | 116901159  | 308           | 116900982     | 27          |
| chr1       | 119196822    | 119197239  | 418           | 119196976     | 18          |
| chr1       | 120844904    | 120845635  | 732           | 120845281     | 40          |
| chr1       | 120980775    | 120981273  | 499           | 120981111     | 21          |
| chr1       | 153052387    | 153053005  | 619           | 153052730     | 38          |
| chr1       | 154741750    | 154741979  | 230           | 154741865     | 20          |
| chr1       | 155132982    | 155133370  | 389           | 155133242     | 24          |
| chr1       | 158297953    | 158298420  | 468           | 158298077     | 24          |
| chr1       | 159676292    | 159676929  | 638           | 159676526     | 71          |
| chr1       | 159682829    | 159688277  | 5449          | 159683940     | 573         |
| chr1       | 159690285    | 159694068  | 3784          | 159691307     | 478         |
| chr1       | 159697670    | 159703129  | 5460          | 159698723     | 570         |
| chr1       | 159705000    | 159709188  | 4189          | 159706098     | 507         |
| chr1       | 160797618    | 160798277  | 660           | 160797952     | 35          |
| chr1       | 161991533    | 161992003  | 471           | 161991659     | 17          |
| chr1       | 165898839    | 165899292  | 454           | 165898970     | 46          |
| chr1       | 165976955    | 165977411  | 457           | 165977289     | 30          |
| chr1       | 168310245    | 168310577  | 333           | 168310432     | 19          |
| chr1       | 168885540    | 168885879  | 340           | 168885649     | 11          |
| chr1       | 169609429    | 169610093  | 665           | 169609757     | 26          |
| chr1       | 170134712    | 170134980  | 269           | 170134855     | 27          |
| chr1       | 178506938    | 178507567  | 630           | 178507269     | 33          |
| chr1       | 179257711    | 179258267  | 557           | 179257898     | 33          |
| chr1       | 185833518    | 185834192  | 675           | 185833878     | 26          |
| chr1       | 192097951    | 192098274  | 324           | 192098149     | 11          |
| chr1       | 197508505    | 197508731  | 227           | 197508618     | 12          |
| chr1       | 201542291    | 201542542  | 252           | 201542417     | 22          |
| chr1       | 202324944    | 202325305  | 362           | 202325104     | 34          |
| chr1       | 203741536    | 203742147  | 612           | 203741812     | 35          |
| chr1       | 206471288    | 206471561  | 274           | 206471439     | 28          |
| chr1       | 207291458    | 207291996  | 539           | 207291747     | 23          |
| chr1       | 208056449    | 208056725  | 277           | 208056578     | 25          |
| chr1       | 208159119    | 208159666  | 548           | 208159325     | 19          |
| chr1       | 223732293    | 223732520  | 228           | 223732407     | 19          |
| chr1       | 232949185    | 232949692  | 508           | 232949327     | 43          |
| chr1       | 235305282    | 235305957  | 676           | 235305634     | 27          |
| chr1       | 240280890    | 240281407  | 518           | 240281046     | 15          |
| chr1       | 241960321    | 241960965  | 645           | 241960597     | 35          |

| <b>Chr</b> | <b>Start</b> | <b>End</b> | <b>Length</b> | <b>Summit</b> | <b>Tags</b> |
|------------|--------------|------------|---------------|---------------|-------------|
| chr1       | 246401775    | 246402392  | 618           | 246402060     | 24          |
| chr10      | 110194       | 110646     | 453           | 110525        | 21          |
| chr10      | 5570951      | 5571216    | 266           | 5571081       | 24          |
| chr10      | 5678129      | 5678405    | 277           | 5678281       | 22          |
| chr10      | 6297776      | 6298211    | 436           | 6298028       | 29          |
| chr10      | 6457018      | 6457518    | 501           | 6457178       | 20          |
| chr10      | 13956024     | 13956318   | 295           | 13956197      | 19          |
| chr10      | 25044684     | 25045008   | 325           | 25044885      | 24          |
| chr10      | 32080756     | 32081070   | 315           | 32080941      | 25          |
| chr10      | 32461230     | 32461668   | 439           | 32461508      | 18          |
| chr10      | 34439249     | 34439507   | 259           | 34439378      | 23          |
| chr10      | 43686477     | 43686855   | 379           | 43686604      | 22          |
| chr10      | 49672277     | 49672549   | 273           | 49672408      | 35          |
| chr10      | 51497419     | 51498217   | 799           | 51497738      | 33          |
| chr10      | 53795509     | 53795988   | 480           | 53795697      | 19          |
| chr10      | 55049410     | 55049882   | 473           | 55049650      | 22          |
| chr10      | 62620180     | 62620585   | 406           | 62620456      | 47          |
| chr10      | 73700384     | 73700722   | 339           | 73700538      | 36          |
| chr10      | 73793777     | 73794021   | 245           | 73793899      | 16          |
| chr10      | 74410187     | 74410498   | 312           | 74410340      | 37          |
| chr10      | 80667583     | 80667854   | 272           | 80667726      | 27          |
| chr10      | 82289909     | 82290208   | 300           | 82290037      | 26          |
| chr10      | 91801296     | 91801560   | 265           | 91801445      | 17          |
| chr10      | 97100634     | 97100895   | 262           | 97100765      | 16          |
| chr10      | 101144055    | 101144310  | 256           | 101144183     | 31          |
| chr10      | 105629189    | 105629550  | 362           | 105629347     | 34          |
| chr10      | 107132339    | 107132961  | 623           | 107132610     | 19          |
| chr10      | 111567469    | 111568055  | 587           | 111567733     | 18          |
| chr10      | 119587643    | 119588243  | 601           | 119587944     | 22          |
| chr10      | 121430079    | 121430508  | 430           | 121430260     | 31          |
| chr10      | 125194929    | 125195424  | 496           | 125195090     | 26          |
| chr10      | 131419170    | 131419611  | 442           | 131419397     | 28          |
| chr10      | 131664424    | 131664685  | 262           | 131664555     | 32          |
| chr11      | 2940778      | 2941329    | 552           | 2941134       | 23          |
| chr11      | 8848557      | 8848837    | 281           | 8848688       | 28          |
| chr11      | 9523890      | 9524311    | 422           | 9524013       | 15          |
| chr11      | 10151610     | 10152048   | 439           | 10151727      | 20          |
| chr11      | 12068371     | 12068698   | 328           | 12068528      | 87          |
| chr11      | 12937143     | 12937468   | 326           | 12937341      | 22          |
| chr11      | 13051792     | 13052101   | 310           | 13051962      | 52          |
| chr11      | 13119133     | 13119366   | 234           | 13119250      | 33          |
| chr11      | 13287361     | 13287601   | 241           | 13287481      | 30          |
| chr11      | 21979430     | 21979892   | 463           | 21979646      | 12          |
| chr11      | 27502270     | 27502565   | 296           | 27502439      | 13          |
| chr11      | 46804558     | 46804851   | 294           | 46804682      | 24          |
| chr11      | 58487743     | 58488110   | 368           | 58487949      | 20          |
| chr11      | 63545306     | 63546154   | 849           | 63545909      | 57          |
| chr11      | 63764726     | 63765429   | 704           | 63765056      | 38          |
| chr11      | 65932730     | 65933297   | 568           | 65933007      | 23          |
| chr11      | 65962587     | 65963072   | 486           | 65962718      | 28          |
| chr11      | 68532716     | 68533146   | 431           | 68532971      | 26          |
| chr11      | 68821374     | 68821757   | 384           | 68821594      | 28          |
| chr11      | 68878206     | 68878530   | 325           | 68878353      | 21          |

| Chr   | Start     | End       | Length | Summit    | Tags |
|-------|-----------|-----------|--------|-----------|------|
| chr11 | 73036196  | 73036758  | 563    | 73036638  | 44   |
| chr11 | 73559900  | 73560301  | 402    | 73560029  | 37   |
| chr11 | 76558915  | 76559192  | 278    | 76559062  | 28   |
| chr11 | 77046241  | 77046835  | 595    | 77046600  | 29   |
| chr11 | 81544674  | 81545284  | 611    | 81544991  | 22   |
| chr11 | 85851726  | 85852272  | 547    | 85851968  | 67   |
| chr11 | 93866173  | 93866521  | 349    | 93866362  | 31   |
| chr11 | 95783693  | 95784365  | 673    | 95783996  | 36   |
| chr11 | 99704930  | 99705223  | 294    | 99705058  | 17   |
| chr11 | 101693286 | 101693814 | 529    | 101693468 | 30   |
| chr11 | 104392393 | 104392844 | 452    | 104392635 | 16   |
| chr11 | 119123680 | 119124140 | 461    | 119123951 | 31   |
| chr11 | 119128245 | 119128548 | 304    | 119128392 | 22   |
| chr11 | 121199895 | 121200438 | 544    | 121200096 | 24   |
| chr11 | 122763512 | 122763756 | 245    | 122763634 | 16   |
| chr11 | 125769136 | 125769556 | 421    | 125769390 | 30   |
| chr12 | 3077351   | 3077580   | 230    | 3077466   | 27   |
| chr12 | 3084410   | 3084761   | 352    | 3084630   | 30   |
| chr12 | 3484063   | 3484565   | 503    | 3484188   | 21   |
| chr12 | 4253560   | 4254177   | 618    | 4253923   | 35   |
| chr12 | 6194154   | 6194602   | 449    | 6194283   | 39   |
| chr12 | 6355743   | 6356293   | 551    | 6355957   | 43   |
| chr12 | 6898881   | 6899366   | 486    | 6899241   | 39   |
| chr12 | 8958127   | 8958775   | 649    | 8958426   | 25   |
| chr12 | 15491094  | 15491393  | 300    | 15491211  | 10   |
| chr12 | 30997575  | 30997862  | 288    | 30997689  | 22   |
| chr12 | 41986153  | 41986426  | 274    | 41986287  | 22   |
| chr12 | 43631163  | 43631784  | 622    | 43631459  | 32   |
| chr12 | 46538534  | 46538858  | 325    | 46538728  | 23   |
| chr12 | 46629960  | 46630430  | 471    | 46630170  | 48   |
| chr12 | 50825459  | 50826020  | 562    | 50825792  | 36   |
| chr12 | 50835510  | 50835847  | 338    | 50835637  | 27   |
| chr12 | 53468949  | 53469385  | 437    | 53469080  | 17   |
| chr12 | 54094859  | 54095296  | 438    | 54095167  | 35   |
| chr12 | 54979882  | 54980346  | 465    | 54980053  | 22   |
| chr12 | 56444823  | 56445813  | 991    | 56445660  | 89   |
| chr12 | 62972699  | 62973284  | 586    | 62972966  | 20   |
| chr12 | 64504124  | 64504576  | 453    | 64504454  | 20   |
| chr12 | 67709054  | 67709503  | 450    | 67709202  | 38   |
| chr12 | 77962957  | 77963330  | 374    | 77963097  | 24   |
| chr12 | 82592430  | 82592838  | 409    | 82592556  | 15   |
| chr12 | 95281590  | 95281863  | 274    | 95281712  | 16   |
| chr12 | 101750345 | 101750784 | 440    | 101750657 | 15   |
| chr12 | 109776983 | 109777258 | 276    | 109777127 | 31   |
| chr12 | 111543507 | 111544188 | 682    | 111543835 | 29   |
| chr12 | 121891549 | 121891956 | 408    | 121891781 | 53   |
| chr12 | 122694292 | 122694665 | 374    | 122694422 | 25   |
| chr12 | 123550887 | 123551661 | 775    | 123551352 | 45   |
| chr12 | 125354883 | 125355454 | 572    | 125355086 | 22   |
| chr12 | 131598156 | 131598635 | 480    | 131598287 | 26   |
| chr13 | 26922212  | 26922613  | 402    | 26922327  | 13   |
| chr13 | 30680291  | 30680678  | 388    | 30680572  | 17   |
| chr13 | 35485798  | 35486141  | 344    | 35485924  | 18   |

| <b>Chr</b> | <b>Start</b> | <b>End</b> | <b>Length</b> | <b>Summit</b> | <b>Tags</b> |
|------------|--------------|------------|---------------|---------------|-------------|
| chr13      | 38226034     | 38226316   | 283           | 38226199      | 15          |
| chr13      | 38984930     | 38985184   | 255           | 38985057      | 25          |
| chr13      | 43447541     | 43448392   | 852           | 43447943      | 39          |
| chr13      | 43783243     | 43783539   | 297           | 43783389      | 22          |
| chr13      | 44316821     | 44317209   | 389           | 44317080      | 25          |
| chr13      | 76090217     | 76090746   | 530           | 76090523      | 23          |
| chr13      | 84595490     | 84596068   | 579           | 84595785      | 20          |
| chr13      | 86101266     | 86101663   | 398           | 86101535      | 15          |
| chr13      | 97518775     | 97519049   | 275           | 97518919      | 39          |
| chr13      | 111649383    | 111649801  | 419           | 111649564     | 27          |
| chr14      | 23810087     | 23810641   | 555           | 23810315      | 37          |
| chr14      | 30013278     | 30013757   | 480           | 30013447      | 22          |
| chr14      | 31001425     | 31001746   | 322           | 31001595      | 30          |
| chr14      | 36355468     | 36355757   | 290           | 36355639      | 12          |
| chr14      | 36895086     | 36895543   | 458           | 36895415      | 18          |
| chr14      | 47333831     | 47334316   | 486           | 47334029      | 17          |
| chr14      | 47726114     | 47726649   | 536           | 47726474      | 24          |
| chr14      | 49160400     | 49160625   | 226           | 49160513      | 18          |
| chr14      | 49848726     | 49849273   | 548           | 49849072      | 27          |
| chr14      | 55398255     | 55398679   | 425           | 55398552      | 16          |
| chr14      | 56204116     | 56204747   | 632           | 56204440      | 33          |
| chr14      | 57569106     | 57569817   | 712           | 57569451      | 26          |
| chr14      | 59488239     | 59488884   | 646           | 59488550      | 23          |
| chr14      | 67044207     | 67044491   | 285           | 67044336      | 41          |
| chr14      | 68042850     | 68043142   | 293           | 68043018      | 28          |
| chr14      | 69249643     | 69249981   | 339           | 69249770      | 35          |
| chr14      | 69472940     | 69473198   | 259           | 69473069      | 25          |
| chr14      | 71212443     | 71212801   | 359           | 71212682      | 18          |
| chr14      | 72095753     | 72096181   | 429           | 72095910      | 50          |
| chr14      | 80860024     | 80860447   | 424           | 80860214      | 26          |
| chr14      | 84960505     | 84960809   | 305           | 84960611      | 15          |
| chr14      | 90650089     | 90650552   | 464           | 90650211      | 26          |
| chr14      | 95050629     | 95051098   | 470           | 95050935      | 55          |
| chr14      | 95751947     | 95752337   | 391           | 95752120      | 31          |
| chr14      | 98423076     | 98423474   | 399           | 98423237      | 27          |
| chr14      | 98863902     | 98864188   | 287           | 98864053      | 29          |
| chr14      | 99265140     | 99265579   | 440           | 99265368      | 33          |
| chr14      | 100319833    | 100320346  | 514           | 100319991     | 41          |
| chr14      | 103972227    | 103972836  | 610           | 103972508     | 34          |
| chr14      | 104698770    | 104699093  | 324           | 104698938     | 55          |
| chr14      | 105002689    | 105003260  | 572           | 105003020     | 36          |
| chr15      | 28982997     | 28983436   | 440           | 28983180      | 22          |
| chr15      | 29452164     | 29452463   | 300           | 29452329      | 43          |
| chr15      | 35484215     | 35484578   | 364           | 35484457      | 18          |
| chr15      | 37862098     | 37862528   | 431           | 37862425      | 17          |
| chr15      | 38156312     | 38156821   | 510           | 38156659      | 37          |
| chr15      | 39111324     | 39111696   | 373           | 39111450      | 21          |
| chr15      | 42910010     | 42910513   | 504           | 42910234      | 55          |
| chr15      | 43149436     | 43149861   | 426           | 43149681      | 39          |
| chr15      | 49116325     | 49116959   | 635           | 49116672      | 19          |
| chr15      | 55633770     | 55634138   | 369           | 55634009      | 25          |
| chr15      | 55806509     | 55806819   | 311           | 55806707      | 32          |
| chr15      | 58488686     | 58489200   | 515           | 58488922      | 27          |

| Chr   | Start    | End      | Length | Summit   | Tags |
|-------|----------|----------|--------|----------|------|
| chr15 | 67368437 | 67368737 | 301    | 67368560 | 29   |
| chr15 | 67473235 | 67473489 | 255    | 67473362 | 23   |
| chr15 | 67728468 | 67728793 | 326    | 67728612 | 25   |
| chr15 | 68277250 | 68277563 | 314    | 68277381 | 29   |
| chr15 | 70234628 | 70235001 | 374    | 70234831 | 46   |
| chr15 | 72067490 | 72067796 | 307    | 72067621 | 47   |
| chr15 | 72842731 | 72843396 | 666    | 72843046 | 67   |
| chr15 | 73773218 | 73773741 | 524    | 73773584 | 44   |
| chr15 | 75584858 | 75585327 | 470    | 75585163 | 38   |
| chr15 | 77114706 | 77115042 | 337    | 77114906 | 35   |
| chr15 | 78082464 | 78082894 | 431    | 78082747 | 27   |
| chr15 | 79776653 | 79777378 | 726    | 79776998 | 39   |
| chr15 | 79809801 | 79810432 | 632    | 79810121 | 21   |
| chr15 | 80729747 | 80730153 | 407    | 80729969 | 27   |
| chr15 | 80808660 | 80809114 | 455    | 80808936 | 25   |
| chr15 | 80991563 | 80992000 | 438    | 80991800 | 15   |
| chr15 | 83534586 | 83534832 | 247    | 83534709 | 16   |
| chr15 | 99071373 | 99071667 | 295    | 99071542 | 37   |
| chr16 | 1998215  | 1998548  | 334    | 1998402  | 28   |
| chr16 | 2068472  | 2069514  | 1043   | 2069179  | 66   |
| chr16 | 2230378  | 2230608  | 231    | 2230493  | 21   |
| chr16 | 3011638  | 3011969  | 332    | 3011837  | 28   |
| chr16 | 4526736  | 4526967  | 232    | 4526852  | 23   |
| chr16 | 4654938  | 4655424  | 487    | 4655274  | 48   |
| chr16 | 4672908  | 4673204  | 297    | 4673067  | 44   |
| chr16 | 4903943  | 4904311  | 369    | 4904188  | 28   |
| chr16 | 11018173 | 11018523 | 351    | 11018398 | 32   |
| chr16 | 14308287 | 14308682 | 396    | 14308466 | 29   |
| chr16 | 14926404 | 14927179 | 776    | 14926813 | 40   |
| chr16 | 15135686 | 15136197 | 512    | 15135982 | 27   |
| chr16 | 15381952 | 15382458 | 507    | 15382292 | 28   |
| chr16 | 15593594 | 15593991 | 398    | 15593827 | 28   |
| chr16 | 16325129 | 16325822 | 694    | 16325464 | 52   |
| chr16 | 16369537 | 16370011 | 475    | 16369720 | 29   |
| chr16 | 18345624 | 18346315 | 692    | 18345955 | 41   |
| chr16 | 18384854 | 18385361 | 508    | 18385145 | 33   |
| chr16 | 27278889 | 27279328 | 440    | 27279172 | 22   |
| chr16 | 28741480 | 28742890 | 1411   | 28742156 | 60   |
| chr16 | 30163942 | 30164448 | 507    | 30164241 | 36   |
| chr16 | 49130082 | 49130367 | 286    | 49130243 | 21   |
| chr16 | 54365682 | 54365958 | 277    | 54365831 | 18   |
| chr16 | 55467719 | 55468191 | 473    | 55467881 | 29   |
| chr16 | 56355676 | 56356338 | 663    | 56355962 | 40   |
| chr16 | 56404110 | 56404461 | 352    | 56404305 | 53   |
| chr16 | 56584778 | 56585246 | 469    | 56585055 | 28   |
| chr16 | 56871898 | 56872181 | 284    | 56872057 | 16   |
| chr16 | 60509803 | 60510286 | 484    | 60510161 | 25   |
| chr16 | 73321403 | 73321795 | 393    | 73321522 | 25   |
| chr16 | 78682872 | 78683136 | 265    | 78683008 | 17   |
| chr16 | 80730610 | 80730917 | 308    | 80730794 | 24   |
| chr16 | 82228532 | 82229139 | 608    | 82228833 | 21   |
| chr16 | 84115550 | 84115900 | 351    | 84115769 | 23   |
| chr16 | 86815189 | 86815592 | 404    | 86815364 | 52   |

| <b>Chr</b> | <b>Start</b> | <b>End</b> | <b>Length</b> | <b>Summit</b> | <b>Tags</b> |
|------------|--------------|------------|---------------|---------------|-------------|
| chr16      | 87291910     | 87292511   | 602           | 87292160      | 34          |
| chr16      | 87946062     | 87946363   | 302           | 87946191      | 26          |
| chr16      | 88240725     | 88242539   | 1815          | 88241057      | 93          |
| chr17      | 776535       | 777148     | 614           | 776801        | 38          |
| chr17      | 1580485      | 1581259    | 775           | 1580890       | 43          |
| chr17      | 3002806      | 3003310    | 505           | 3002978       | 22          |
| chr17      | 15253680     | 15254030   | 351           | 15253856      | 91          |
| chr17      | 16996039     | 16996376   | 338           | 16996182      | 26          |
| chr17      | 17757944     | 17758519   | 576           | 17758126      | 42          |
| chr17      | 18957571     | 18957997   | 427           | 18957698      | 25          |
| chr17      | 20876496     | 20876758   | 263           | 20876627      | 40          |
| chr17      | 23949948     | 23950395   | 448           | 23950210      | 27          |
| chr17      | 33865171     | 33865490   | 320           | 33865317      | 49          |
| chr17      | 33901757     | 33902080   | 324           | 33901888      | 23          |
| chr17      | 35151071     | 35151496   | 426           | 35151288      | 26          |
| chr17      | 35947809     | 35948209   | 401           | 35947943      | 24          |
| chr17      | 37002482     | 37002979   | 498           | 37002631      | 39          |
| chr17      | 37520195     | 37520788   | 594           | 37520467      | 46          |
| chr17      | 38795033     | 38795390   | 358           | 38795282      | 21          |
| chr17      | 42252447     | 42252737   | 291           | 42252613      | 19          |
| chr17      | 45460046     | 45460613   | 568           | 45460237      | 62          |
| chr17      | 45951938     | 45952225   | 288           | 45952099      | 38          |
| chr17      | 50934313     | 50934645   | 333           | 50934517      | 15          |
| chr17      | 60047798     | 60048084   | 287           | 60047920      | 20          |
| chr17      | 62028456     | 62029057   | 602           | 62028716      | 21          |
| chr17      | 68009845     | 68010081   | 237           | 68009963      | 28          |
| chr17      | 68139214     | 68139586   | 373           | 68139429      | 43          |
| chr17      | 72048112     | 72048695   | 584           | 72048340      | 45          |
| chr17      | 72828353     | 72828782   | 430           | 72828560      | 22          |
| chr17      | 73854453     | 73854675   | 223           | 73854564      | 20          |
| chr17      | 75678462     | 75678893   | 432           | 75678626      | 32          |
| chr17      | 76646741     | 76647212   | 472           | 76647029      | 27          |
| chr17      | 76670391     | 76671087   | 697           | 76670804      | 46          |
| chr17      | 76889935     | 76890657   | 723           | 76890287      | 94          |
| chr17      | 78219606     | 78220122   | 517           | 78219952      | 30          |
| chr18      | 3256107      | 3256396    | 290           | 3256248       | 28          |
| chr18      | 5674870      | 5675474    | 605           | 5675133       | 22          |
| chr18      | 27961942     | 27962427   | 486           | 27962235      | 19          |
| chr18      | 32034724     | 32035073   | 350           | 32034901      | 21          |
| chr18      | 33653808     | 33654468   | 661           | 33654166      | 27          |
| chr18      | 43553028     | 43553271   | 244           | 43553150      | 20          |
| chr18      | 44319065     | 44319626   | 562           | 44319332      | 29          |
| chr18      | 44326132     | 44326419   | 288           | 44326261      | 38          |
| chr18      | 44403512     | 44403867   | 356           | 44403716      | 29          |
| chr18      | 44797511     | 44797908   | 398           | 44797640      | 25          |
| chr18      | 53760325     | 53760603   | 279           | 53760473      | 26          |
| chr18      | 73006413     | 73006995   | 583           | 73006649      | 28          |
| chr18      | 74891741     | 74892026   | 286           | 74891879      | 41          |
| chr19      | 836611       | 837109     | 499           | 836762        | 55          |
| chr19      | 1017694      | 1018372    | 679           | 1017996       | 41          |
| chr19      | 2271064      | 2271633    | 570           | 2271314       | 45          |
| chr19      | 4673691      | 4674040    | 350           | 4673838       | 42          |
| chr19      | 4967854      | 4968279    | 426           | 4968110       | 27          |



| <b>Chr</b> | <b>Start</b> | <b>End</b> | <b>Length</b> | <b>Summit</b> | <b>Tags</b> |
|------------|--------------|------------|---------------|---------------|-------------|
| chr19      | 5641253      | 5641943    | 691           | 5641582       | 32          |
| chr19      | 5835292      | 5835498    | 207           | 5835395       | 18          |
| chr19      | 6427504      | 6427864    | 361           | 6427657       | 30          |
| chr19      | 11055881     | 11056230   | 350           | 11056061      | 39          |
| chr19      | 11981861     | 11982480   | 620           | 11982178      | 16          |
| chr19      | 12522892     | 12523457   | 566           | 12523218      | 35          |
| chr19      | 13955237     | 13955954   | 718           | 13955570      | 38          |
| chr19      | 14053456     | 14053997   | 542           | 14053820      | 47          |
| chr19      | 14533622     | 14534024   | 403           | 14533751      | 24          |
| chr19      | 17313880     | 17314356   | 477           | 17314043      | 26          |
| chr19      | 18728723     | 18729371   | 649           | 18729024      | 38          |
| chr19      | 21810360     | 21810722   | 363           | 21810526      | 16          |
| chr19      | 22081862     | 22082751   | 890           | 22082169      | 31          |
| chr19      | 43477980     | 43478430   | 451           | 43478300      | 37          |
| chr19      | 45640981     | 45641344   | 364           | 45641178      | 27          |
| chr19      | 48561686     | 48562041   | 356           | 48561864      | 21          |
| chr19      | 50838657     | 50839015   | 359           | 50838892      | 23          |
| chr19      | 52642427     | 52642996   | 570           | 52642718      | 26          |
| chr19      | 53536127     | 53536469   | 343           | 53536293      | 24          |
| chr19      | 53994078     | 53994480   | 403           | 53994209      | 39          |
| chr2       | 789854       | 790373     | 520           | 790001        | 20          |
| chr2       | 1739924      | 1740436    | 513           | 1740106       | 22          |
| chr2       | 5748781      | 5749319    | 539           | 5749021       | 25          |
| chr2       | 5754408      | 5754776    | 369           | 5754650       | 25          |
| chr2       | 9823701      | 9824165    | 465           | 9823869       | 30          |
| chr2       | 10451021     | 10451530   | 510           | 10451353      | 37          |
| chr2       | 14905711     | 14906424   | 714           | 14906078      | 31          |
| chr2       | 19227264     | 19227668   | 405           | 19227537      | 12          |
| chr2       | 22381038     | 22381391   | 354           | 22381165      | 21          |
| chr2       | 31040428     | 31040749   | 322           | 31040618      | 29          |
| chr2       | 43746354     | 43747007   | 654           | 43746682      | 26          |
| chr2       | 45723167     | 45723470   | 304           | 45723298      | 22          |
| chr2       | 50595567     | 50595750   | 184           | 50595659      | 11          |
| chr2       | 60221932     | 60222427   | 496           | 60222279      | 23          |
| chr2       | 61358524     | 61358746   | 223           | 61358635      | 16          |
| chr2       | 64056363     | 64056754   | 392           | 64056632      | 54          |
| chr2       | 65433229     | 65433632   | 404           | 65433355      | 21          |
| chr2       | 70173220     | 70173784   | 565           | 70173423      | 39          |
| chr2       | 70676977     | 70677258   | 282           | 70677105      | 22          |
| chr2       | 73152480     | 73152997   | 518           | 73152868      | 56          |
| chr2       | 85354825     | 85355384   | 560           | 85355187      | 72          |
| chr2       | 96790507     | 96790834   | 328           | 96790621      | 24          |
| chr2       | 106113840    | 106114498  | 659           | 106114198     | 34          |
| chr2       | 110319615    | 110320049  | 435           | 110319814     | 15          |
| chr2       | 118123359    | 118123964  | 606           | 118123676     | 17          |
| chr2       | 118616298    | 118616787  | 490           | 118616621     | 15          |
| chr2       | 121417806    | 121418166  | 361           | 121417937     | 41          |
| chr2       | 122525692    | 122526183  | 492           | 122525837     | 19          |
| chr2       | 124614030    | 124614404  | 375           | 124614275     | 17          |
| chr2       | 128847598    | 128848080  | 483           | 128847764     | 39          |
| chr2       | 128848093    | 128848572  | 480           | 128848358     | 59          |
| chr2       | 128882364    | 128882631  | 268           | 128882491     | 36          |
| chr2       | 129890658    | 129891351  | 694           | 129890994     | 23          |

| Chr   | Start     | End       | Length | Summit    | Tags |
|-------|-----------|-----------|--------|-----------|------|
| chr2  | 130221961 | 130222439 | 479    | 130222104 | 17   |
| chr2  | 144335288 | 144335826 | 539    | 144335468 | 36   |
| chr2  | 150510137 | 150510782 | 646    | 150510474 | 25   |
| chr2  | 154284285 | 154284992 | 708    | 154284631 | 32   |
| chr2  | 157933354 | 157934104 | 751    | 157933736 | 39   |
| chr2  | 166050796 | 166051477 | 682    | 166051134 | 26   |
| chr2  | 169813444 | 169814176 | 733    | 169813824 | 36   |
| chr2  | 173308220 | 173308683 | 464    | 173308381 | 17   |
| chr2  | 176702894 | 176703574 | 681    | 176703251 | 25   |
| chr2  | 178047361 | 178047610 | 250    | 178047486 | 27   |
| chr2  | 193743945 | 193744386 | 442    | 193744102 | 11   |
| chr2  | 194283249 | 194283551 | 303    | 194283431 | 11   |
| chr2  | 197970546 | 197970790 | 245    | 197970668 | 28   |
| chr2  | 202569008 | 202569592 | 585    | 202569241 | 42   |
| chr2  | 203035157 | 203035527 | 371    | 203035267 | 18   |
| chr2  | 208199366 | 208199724 | 359    | 208199522 | 18   |
| chr2  | 218956569 | 218957261 | 693    | 218956943 | 41   |
| chr2  | 219283423 | 219284031 | 609    | 219283761 | 21   |
| chr2  | 220504864 | 220505575 | 712    | 220505201 | 28   |
| chr2  | 232185526 | 232185792 | 267    | 232185663 | 20   |
| chr2  | 235461875 | 235462569 | 695    | 235462225 | 35   |
| chr2  | 238743110 | 238743371 | 262    | 238743241 | 29   |
| chr2  | 240293442 | 240294467 | 1026   | 240293784 | 80   |
| chr2  | 241132839 | 241133338 | 500    | 241133045 | 26   |
| chr2  | 242147384 | 242147936 | 553    | 242147738 | 30   |
| chr2  | 242679888 | 242680267 | 380    | 242680138 | 23   |
| chr20 | 3168535   | 3169043   | 509    | 3168882   | 34   |
| chr20 | 11561526  | 11562209  | 684    | 11561879  | 27   |
| chr20 | 20324967  | 20325341  | 375    | 20325190  | 19   |
| chr20 | 24986875  | 24987307  | 433    | 24987080  | 32   |
| chr20 | 30563094  | 30563456  | 363    | 30563205  | 19   |
| chr20 | 30732742  | 30733143  | 402    | 30733016  | 23   |
| chr20 | 31541696  | 31542159  | 464    | 31541819  | 30   |
| chr20 | 35357483  | 35357708  | 226    | 35357596  | 19   |
| chr20 | 35952408  | 35952729  | 322    | 35952582  | 30   |
| chr20 | 44021355  | 44021602  | 248    | 44021479  | 21   |
| chr20 | 50155981  | 50156480  | 500    | 50156147  | 21   |
| chr20 | 51510706  | 51511379  | 674    | 51511043  | 23   |
| chr20 | 54699069  | 54699467  | 399    | 54699230  | 46   |
| chr20 | 54773777  | 54774006  | 230    | 54773892  | 20   |
| chr20 | 56431561  | 56431999  | 439    | 56431797  | 19   |
| chr20 | 58211888  | 58212364  | 477    | 58212009  | 58   |
| chr20 | 59445283  | 59445563  | 281    | 59445420  | 24   |
| chr20 | 59648592  | 59648945  | 354    | 59648760  | 27   |
| chr20 | 60314352  | 60314817  | 466    | 60314643  | 26   |
| chr20 | 60896976  | 60897633  | 658    | 60897283  | 55   |
| chr20 | 62323941  | 62324446  | 506    | 62324280  | 32   |
| chr21 | 17670356  | 17670818  | 463    | 17670704  | 20   |
| chr21 | 17961537  | 17961785  | 249    | 17961661  | 16   |
| chr21 | 26262314  | 26262540  | 227    | 26262427  | 12   |
| chr21 | 33555870  | 33556278  | 409    | 33555985  | 29   |
| chr21 | 41927322  | 41927769  | 448    | 41927612  | 53   |
| chr21 | 42061346  | 42061615  | 270    | 42061494  | 29   |

| Chr   | Start     | End       | Length | Summit    | Tags |
|-------|-----------|-----------|--------|-----------|------|
| chr21 | 43845400  | 43845676  | 277    | 43845515  | 25   |
| chr21 | 44954318  | 44954610  | 293    | 44954434  | 30   |
| chr21 | 45617334  | 45617693  | 360    | 45617518  | 34   |
| chr21 | 46119359  | 46119781  | 423    | 46119614  | 32   |
| chr22 | 18609713  | 18610437  | 725    | 18610061  | 41   |
| chr22 | 19078152  | 19078709  | 558    | 19078359  | 25   |
| chr22 | 20795502  | 20796112  | 611    | 20795856  | 35   |
| chr22 | 21954343  | 21954779  | 437    | 21954488  | 34   |
| chr22 | 23837102  | 23837723  | 622    | 23837335  | 61   |
| chr22 | 24036568  | 24036778  | 211    | 24036673  | 15   |
| chr22 | 24340087  | 24340326  | 240    | 24340207  | 23   |
| chr22 | 25196649  | 25196879  | 231    | 25196764  | 19   |
| chr22 | 26200661  | 26201125  | 465    | 26200995  | 28   |
| chr22 | 26644517  | 26644918  | 402    | 26644680  | 39   |
| chr22 | 27610420  | 27610780  | 361    | 27610549  | 20   |
| chr22 | 27625313  | 27625565  | 253    | 27625439  | 30   |
| chr22 | 35060996  | 35061518  | 523    | 35061181  | 42   |
| chr22 | 35296081  | 35296362  | 282    | 35296218  | 25   |
| chr22 | 36968866  | 36969531  | 666    | 36969176  | 33   |
| chr22 | 37567229  | 37567541  | 313    | 37567415  | 20   |
| chr22 | 37949325  | 37949801  | 477    | 37949456  | 32   |
| chr22 | 41357439  | 41358032  | 594    | 41357831  | 115  |
| chr22 | 43135244  | 43135735  | 492    | 43135438  | 72   |
| chr22 | 44400889  | 44401164  | 276    | 44401018  | 22   |
| chr22 | 47701031  | 47701579  | 549    | 47701371  | 42   |
| chr22 | 48970633  | 48971676  | 1044   | 48971315  | 46   |
| chr22 | 49069631  | 49070330  | 700    | 49069986  | 32   |
| chr22 | 49469320  | 49469651  | 332    | 49469451  | 48   |
| chr3  | 1404491   | 1404983   | 493    | 1404702   | 21   |
| chr3  | 3979874   | 3980545   | 672    | 3980221   | 30   |
| chr3  | 5016636   | 5016985   | 350    | 5016792   | 57   |
| chr3  | 10365248  | 10365624  | 377    | 10365504  | 36   |
| chr3  | 11172145  | 11172473  | 329    | 11172272  | 20   |
| chr3  | 13868605  | 13869130  | 526    | 13868759  | 55   |
| chr3  | 18952229  | 18952921  | 693    | 18952560  | 28   |
| chr3  | 27270357  | 27270598  | 242    | 27270478  | 18   |
| chr3  | 34106281  | 34106875  | 595    | 34106595  | 15   |
| chr3  | 44899972  | 44900511  | 540    | 44900193  | 44   |
| chr3  | 44935078  | 44935470  | 393    | 44935203  | 31   |
| chr3  | 46959569  | 46959934  | 366    | 46959790  | 29   |
| chr3  | 46997255  | 46997766  | 512    | 46997434  | 53   |
| chr3  | 58802998  | 58803641  | 644    | 58803332  | 26   |
| chr3  | 62323980  | 62324263  | 284    | 62324136  | 43   |
| chr3  | 63177656  | 63178346  | 691    | 63177987  | 27   |
| chr3  | 63720938  | 63721363  | 426    | 63721069  | 23   |
| chr3  | 77296242  | 77296795  | 554    | 77296489  | 13   |
| chr3  | 88640200  | 88640809  | 610    | 88640507  | 16   |
| chr3  | 90306637  | 90307341  | 705    | 90306982  | 23   |
| chr3  | 104422097 | 104422556 | 460    | 104422428 | 32   |
| chr3  | 110401475 | 110402023 | 549    | 110401873 | 27   |
| chr3  | 111839001 | 111839501 | 501    | 111839131 | 18   |
| chr3  | 120208282 | 120208879 | 598    | 120208572 | 16   |
| chr3  | 123679931 | 123680313 | 383    | 123680203 | 14   |

| Chr  | Start     | End       | Length | Summit    | Tags |
|------|-----------|-----------|--------|-----------|------|
| chr3 | 124935290 | 124935767 | 478    | 124935556 | 51   |
| chr3 | 127138278 | 127138910 | 633    | 127138619 | 31   |
| chr3 | 128892281 | 128892721 | 441    | 128892437 | 28   |
| chr3 | 133828540 | 133828812 | 273    | 133828685 | 33   |
| chr3 | 135575608 | 135576276 | 669    | 135576000 | 44   |
| chr3 | 140349085 | 140349678 | 594    | 140349396 | 13   |
| chr3 | 141950530 | 141950804 | 275    | 141950653 | 25   |
| chr3 | 160700779 | 160701212 | 434    | 160700924 | 19   |
| chr3 | 161060388 | 161060658 | 271    | 161060530 | 34   |
| chr3 | 164413165 | 164413569 | 405    | 164413291 | 10   |
| chr3 | 167227035 | 167227520 | 486    | 167227165 | 15   |
| chr3 | 178857784 | 178858059 | 276    | 178857933 | 19   |
| chr3 | 184678484 | 184678832 | 349    | 184678702 | 58   |
| chr3 | 188612693 | 188613348 | 656    | 188613029 | 23   |
| chr3 | 196204023 | 196204357 | 335    | 196204154 | 20   |
| chr4 | 1956145   | 1956452   | 308    | 1956288   | 49   |
| chr4 | 3046562   | 3046949   | 388    | 3046827   | 25   |
| chr4 | 8376809   | 8377190   | 382    | 8377034   | 24   |
| chr4 | 11034689  | 11034993  | 305    | 11034878  | 35   |
| chr4 | 11080919  | 11081185  | 267    | 11081058  | 20   |
| chr4 | 14365937  | 14366594  | 658    | 14366255  | 23   |
| chr4 | 23225605  | 23226171  | 567    | 23225951  | 22   |
| chr4 | 24080954  | 24081709  | 756    | 24081311  | 75   |
| chr4 | 39733921  | 39734537  | 617    | 39734257  | 24   |
| chr4 | 40280545  | 40280950  | 406    | 40280835  | 16   |
| chr4 | 57639751  | 57639992  | 242    | 57639872  | 36   |
| chr4 | 58128434  | 58128911  | 478    | 58128790  | 19   |
| chr4 | 68520998  | 68521465  | 468    | 68521280  | 24   |
| chr4 | 76545542  | 76546013  | 472    | 76545884  | 19   |
| chr4 | 79638832  | 79639259  | 428    | 79639115  | 26   |
| chr4 | 79916240  | 79916924  | 685    | 79916617  | 51   |
| chr4 | 80844834  | 80845474  | 641    | 80845184  | 25   |
| chr4 | 82294012  | 82294732  | 721    | 82294385  | 31   |
| chr4 | 88492531  | 88493222  | 692    | 88492857  | 24   |
| chr4 | 123251012 | 123251499 | 488    | 123251143 | 18   |
| chr4 | 123810620 | 123811153 | 534    | 123810868 | 35   |
| chr4 | 128161454 | 128161903 | 450    | 128161601 | 25   |
| chr4 | 136588224 | 136588745 | 522    | 136588541 | 23   |
| chr4 | 146510140 | 146510741 | 602    | 146510397 | 29   |
| chr4 | 151056225 | 151056904 | 680    | 151056589 | 25   |
| chr4 | 153820405 | 153820824 | 420    | 153820536 | 19   |
| chr4 | 165677479 | 165677726 | 248    | 165677603 | 12   |
| chr4 | 165699544 | 165700034 | 491    | 165699669 | 16   |
| chr4 | 170191478 | 170191781 | 304    | 170191645 | 32   |
| chr4 | 171589220 | 171589683 | 464    | 171589564 | 22   |
| chr4 | 185486287 | 185486643 | 357    | 185486482 | 18   |
| chr4 | 187229539 | 187229805 | 267    | 187229687 | 17   |
| chr4 | 189721704 | 189722136 | 433    | 189722007 | 13   |
| chr5 | 1192958   | 1193485   | 528    | 1193123   | 36   |
| chr5 | 2060999   | 2061761   | 763    | 2061550   | 56   |
| chr5 | 6413936   | 6414278   | 343    | 6414064   | 17   |
| chr5 | 9494693   | 9494996   | 304    | 9494868   | 23   |
| chr5 | 13469680  | 13470423  | 744    | 13470053  | 30   |

| Chr  | Start     | End       | Length | Summit    | Tags |
|------|-----------|-----------|--------|-----------|------|
| chr5 | 14474955  | 14475331  | 377    | 14475116  | 60   |
| chr5 | 19197292  | 19197897  | 606    | 19197617  | 23   |
| chr5 | 20302255  | 20302563  | 309    | 20302358  | 12   |
| chr5 | 34184025  | 34184440  | 416    | 34184162  | 16   |
| chr5 | 37415059  | 37415500  | 442    | 37415370  | 16   |
| chr5 | 38881499  | 38882126  | 628    | 38881853  | 25   |
| chr5 | 42114454  | 42114731  | 278    | 42114608  | 16   |
| chr5 | 50254224  | 50254784  | 561    | 50254473  | 21   |
| chr5 | 62148978  | 62149470  | 493    | 62149341  | 25   |
| chr5 | 62583839  | 62584070  | 232    | 62583955  | 16   |
| chr5 | 67111781  | 67112330  | 550    | 67112032  | 15   |
| chr5 | 68891627  | 68891884  | 258    | 68891756  | 11   |
| chr5 | 70892769  | 70893021  | 253    | 70892895  | 17   |
| chr5 | 75369079  | 75369525  | 447    | 75369389  | 22   |
| chr5 | 78198529  | 78199117  | 589    | 78198837  | 20   |
| chr5 | 79115916  | 79116420  | 505    | 79116046  | 17   |
| chr5 | 79738348  | 79739050  | 703    | 79738673  | 35   |
| chr5 | 80947769  | 80948395  | 627    | 80948077  | 25   |
| chr5 | 82264342  | 82264815  | 474    | 82264464  | 20   |
| chr5 | 82794602  | 82795053  | 452    | 82794927  | 19   |
| chr5 | 89404933  | 89405352  | 420    | 89405249  | 19   |
| chr5 | 94981878  | 94982492  | 615    | 94982118  | 33   |
| chr5 | 95469920  | 95470586  | 667    | 95470269  | 25   |
| chr5 | 118603356 | 118603852 | 497    | 118603569 | 19   |
| chr5 | 124727802 | 124728495 | 694    | 124728171 | 21   |
| chr5 | 127115999 | 127116593 | 595    | 127116317 | 21   |
| chr5 | 130095961 | 130096436 | 476    | 130096116 | 32   |
| chr5 | 130181591 | 130182089 | 499    | 130181778 | 15   |
| chr5 | 131809631 | 131809938 | 308    | 131809830 | 19   |
| chr5 | 131848878 | 131849239 | 362    | 131849006 | 33   |
| chr5 | 135555126 | 135555746 | 621    | 135555380 | 53   |
| chr5 | 136413475 | 136413955 | 481    | 136413778 | 17   |
| chr5 | 140873997 | 140874362 | 366    | 140874233 | 29   |
| chr5 | 149958523 | 149958998 | 476    | 149958805 | 39   |
| chr5 | 150987959 | 150988460 | 502    | 150988115 | 51   |
| chr5 | 151567164 | 151567800 | 637    | 151567506 | 32   |
| chr5 | 159781377 | 159781821 | 445    | 159781702 | 34   |
| chr5 | 160233406 | 160233726 | 321    | 160233540 | 21   |
| chr5 | 173067169 | 173067536 | 368    | 173067323 | 24   |
| chr5 | 175888364 | 175888933 | 570    | 175888689 | 27   |
| chr5 | 176366029 | 176366564 | 536    | 176366315 | 53   |
| chr5 | 176493052 | 176493755 | 704    | 176493436 | 32   |
| chr5 | 177132005 | 177132435 | 431    | 177132280 | 25   |
| chr5 | 177242922 | 177243388 | 467    | 177243036 | 17   |
| chr5 | 177466414 | 177466861 | 448    | 177466662 | 28   |
| chr5 | 178993623 | 178994324 | 702    | 178993986 | 39   |
| chr5 | 179154649 | 179155263 | 615    | 179154987 | 29   |
| chr5 | 180163285 | 180163988 | 704    | 180163603 | 88   |
| chr6 | 8720959   | 8721608   | 650    | 8721307   | 20   |
| chr6 | 11742478  | 11742781  | 304    | 11742652  | 21   |
| chr6 | 17341762  | 17342070  | 309    | 17341940  | 21   |
| chr6 | 18264020  | 18264491  | 472    | 18264352  | 33   |
| chr6 | 30958279  | 30958815  | 537    | 30958583  | 75   |

| Chr  | Start     | End       | Length | Summit    | Tags |
|------|-----------|-----------|--------|-----------|------|
| chr6 | 31894693  | 31894947  | 255    | 31894820  | 27   |
| chr6 | 31964558  | 31965195  | 638    | 31964884  | 43   |
| chr6 | 34026748  | 34027002  | 255    | 34026875  | 17   |
| chr6 | 37039280  | 37039751  | 472    | 37039438  | 26   |
| chr6 | 37153455  | 37153984  | 530    | 37153739  | 53   |
| chr6 | 42269268  | 42269533  | 266    | 42269403  | 22   |
| chr6 | 44946628  | 44946960  | 333    | 44946780  | 25   |
| chr6 | 45689457  | 45689690  | 234    | 45689574  | 15   |
| chr6 | 49462859  | 49463343  | 485    | 49462993  | 24   |
| chr6 | 49600404  | 49600696  | 293    | 49600527  | 28   |
| chr6 | 57307880  | 57308184  | 305    | 57308061  | 19   |
| chr6 | 74221182  | 74221531  | 350    | 74221311  | 30   |
| chr6 | 79633794  | 79634279  | 486    | 79633944  | 45   |
| chr6 | 82868037  | 82868520  | 484    | 82868184  | 23   |
| chr6 | 86216203  | 86216878  | 676    | 86216534  | 72   |
| chr6 | 86335552  | 86335774  | 223    | 86335663  | 16   |
| chr6 | 86770730  | 86771254  | 525    | 86771043  | 16   |
| chr6 | 87918658  | 87919100  | 443    | 87918972  | 41   |
| chr6 | 91556404  | 91556716  | 313    | 91556599  | 15   |
| chr6 | 100378283 | 100378976 | 694    | 100378623 | 30   |
| chr6 | 113959085 | 113959768 | 684    | 113959469 | 25   |
| chr6 | 121111379 | 121111956 | 578    | 121111634 | 25   |
| chr6 | 127949183 | 127949462 | 280    | 127949314 | 21   |
| chr6 | 141928997 | 141929520 | 524    | 141929101 | 23   |
| chr6 | 150179148 | 150179470 | 323    | 150179324 | 26   |
| chr6 | 156397048 | 156397713 | 666    | 156397423 | 24   |
| chr6 | 160042374 | 160042653 | 280    | 160042499 | 24   |
| chr6 | 161756734 | 161757050 | 317    | 161756921 | 26   |
| chr6 | 168160327 | 168160586 | 260    | 168160457 | 18   |
| chr6 | 168298081 | 168298381 | 301    | 168298250 | 18   |
| chr6 | 170000620 | 170001496 | 877    | 170001244 | 43   |
| chr6 | 170383469 | 170384086 | 618    | 170383762 | 42   |
| chr7 | 837606    | 837844    | 239    | 837725    | 30   |
| chr7 | 1552399   | 1552818   | 420    | 1552543   | 47   |
| chr7 | 1818148   | 1818488   | 341    | 1818282   | 35   |
| chr7 | 1945301   | 1946037   | 737    | 1945655   | 32   |
| chr7 | 2407521   | 2407768   | 248    | 2407645   | 22   |
| chr7 | 2639395   | 2639833   | 439    | 2639654   | 42   |
| chr7 | 2826696   | 2826922   | 227    | 2826809   | 26   |
| chr7 | 4098011   | 4098295   | 285    | 4098172   | 18   |
| chr7 | 5454584   | 5455266   | 683    | 5454995   | 35   |
| chr7 | 6015485   | 6015828   | 344    | 6015698   | 27   |
| chr7 | 7471362   | 7472006   | 645    | 7471704   | 26   |
| chr7 | 17075292  | 17075504  | 213    | 17075398  | 15   |
| chr7 | 25053406  | 25053878  | 473    | 25053558  | 21   |
| chr7 | 27104136  | 27104719  | 584    | 27104329  | 38   |
| chr7 | 43065327  | 43065826  | 500    | 43065662  | 28   |
| chr7 | 44241983  | 44242555  | 573    | 44242328  | 32   |
| chr7 | 44383805  | 44384315  | 511    | 44384144  | 49   |
| chr7 | 50998126  | 50998436  | 311    | 50998262  | 37   |
| chr7 | 55168221  | 55168550  | 330    | 55168385  | 41   |
| chr7 | 64941259  | 64941649  | 391    | 64941408  | 30   |
| chr7 | 72111867  | 72112130  | 264    | 72111998  | 15   |

| Chr  | Start     | End       | Length | Summit    | Tags |
|------|-----------|-----------|--------|-----------|------|
| chr7 | 74828656  | 74828884  | 229    | 74828770  | 15   |
| chr7 | 75106681  | 75107029  | 349    | 75106876  | 20   |
| chr7 | 75359824  | 75360380  | 557    | 75360118  | 38   |
| chr7 | 75987522  | 75988093  | 572    | 75987764  | 36   |
| chr7 | 76477457  | 76477867  | 411    | 76477654  | 35   |
| chr7 | 98875741  | 98876121  | 381    | 98876002  | 22   |
| chr7 | 109333060 | 109333346 | 287    | 109333179 | 13   |
| chr7 | 110139557 | 110140167 | 611    | 110139868 | 30   |
| chr7 | 111390677 | 111391317 | 641    | 111390947 | 28   |
| chr7 | 115742629 | 115742903 | 275    | 115742792 | 15   |
| chr7 | 121387135 | 121387645 | 511    | 121387434 | 14   |
| chr7 | 124608431 | 124609036 | 606    | 124608777 | 19   |
| chr7 | 126258563 | 126258807 | 245    | 126258685 | 14   |
| chr7 | 129699465 | 129699763 | 299    | 129699634 | 21   |
| chr7 | 130780019 | 130780216 | 198    | 130780118 | 11   |
| chr7 | 134077556 | 134077911 | 356    | 134077784 | 20   |
| chr7 | 140378990 | 140379627 | 638    | 140379335 | 24   |
| chr7 | 147175857 | 147176486 | 630    | 147176175 | 25   |
| chr7 | 148000101 | 148000485 | 385    | 148000268 | 16   |
| chr7 | 155046260 | 155046905 | 646    | 155046625 | 46   |
| chr7 | 158014579 | 158015044 | 466    | 158014812 | 44   |
| chr7 | 158239362 | 158239875 | 514    | 158239545 | 21   |
| chr8 | 637152    | 637469    | 318    | 637296    | 26   |
| chr8 | 1543221   | 1543920   | 700    | 1543547   | 35   |
| chr8 | 2447968   | 2448264   | 297    | 2448146   | 20   |
| chr8 | 8520748   | 8521133   | 386    | 8520877   | 21   |
| chr8 | 20214617  | 20215080  | 464    | 20214956  | 34   |
| chr8 | 26309200  | 26309785  | 586    | 26309483  | 23   |
| chr8 | 30704619  | 30705116  | 498    | 30704771  | 27   |
| chr8 | 35153969  | 35154428  | 460    | 35154106  | 24   |
| chr8 | 38689457  | 38689708  | 252    | 38689583  | 16   |
| chr8 | 40408965  | 40409626  | 662    | 40409341  | 25   |
| chr8 | 41554691  | 41554988  | 298    | 41554830  | 15   |
| chr8 | 48744364  | 48744707  | 344    | 48744517  | 38   |
| chr8 | 53000255  | 53000545  | 291    | 53000415  | 30   |
| chr8 | 55296319  | 55296720  | 402    | 55296480  | 34   |
| chr8 | 61883052  | 61883280  | 229    | 61883166  | 18   |
| chr8 | 70329180  | 70329752  | 573    | 70329476  | 16   |
| chr8 | 70431392  | 70432139  | 748    | 70431730  | 42   |
| chr8 | 74370393  | 74370869  | 477    | 74370627  | 43   |
| chr8 | 75941526  | 75942075  | 550    | 75941765  | 26   |
| chr8 | 79015650  | 79016095  | 446    | 79015775  | 20   |
| chr8 | 80842140  | 80842594  | 455    | 80842265  | 20   |
| chr8 | 81762030  | 81762421  | 392    | 81762258  | 33   |
| chr8 | 94487318  | 94488018  | 701    | 94487655  | 32   |
| chr8 | 98377099  | 98377794  | 696    | 98377444  | 29   |
| chr8 | 101802289 | 101803325 | 1037   | 101802616 | 30   |
| chr8 | 102147340 | 102147657 | 318    | 102147530 | 22   |
| chr8 | 105669471 | 105669852 | 382    | 105669661 | 20   |
| chr8 | 121995688 | 121996009 | 322    | 121995807 | 22   |
| chr8 | 126664400 | 126665105 | 706    | 126664733 | 33   |
| chr8 | 128067296 | 128067545 | 250    | 128067421 | 26   |
| chr8 | 128393112 | 128393587 | 476    | 128393459 | 17   |

| Chr  | Start     | End       | Length | Summit    | Tags |
|------|-----------|-----------|--------|-----------|------|
| chr8 | 132852427 | 132853107 | 681    | 132852770 | 23   |
| chr8 | 136957219 | 136958098 | 880    | 136957751 | 29   |
| chr8 | 139129261 | 139129708 | 448    | 139129597 | 16   |
| chr8 | 143303862 | 143304222 | 361    | 143304064 | 38   |
| chr8 | 144160890 | 144161187 | 298    | 144161038 | 35   |
| chr8 | 145102940 | 145103355 | 416    | 145103185 | 27   |
| chr8 | 145569706 | 145570215 | 510    | 145570022 | 31   |
| chr9 | 1213987   | 1214685   | 699    | 1214329   | 31   |
| chr9 | 2004651   | 2005091   | 441    | 2004768   | 18   |
| chr9 | 19531490  | 19532093  | 604    | 19531771  | 24   |
| chr9 | 27680689  | 27681309  | 621    | 27680989  | 25   |
| chr9 | 28107318  | 28107798  | 481    | 28107483  | 16   |
| chr9 | 31284279  | 31284636  | 358    | 31284514  | 17   |
| chr9 | 34840976  | 34841439  | 464    | 34841277  | 40   |
| chr9 | 35859415  | 35860222  | 808    | 35859834  | 62   |
| chr9 | 42357804  | 42358264  | 461    | 42357979  | 27   |
| chr9 | 43070812  | 43071289  | 478    | 43070940  | 41   |
| chr9 | 67515973  | 67516440  | 468    | 67516193  | 19   |
| chr9 | 67569016  | 67569311  | 296    | 67569144  | 32   |
| chr9 | 68724162  | 68724519  | 358    | 68724322  | 21   |
| chr9 | 69690633  | 69691168  | 536    | 69690910  | 20   |
| chr9 | 71851125  | 71851434  | 310    | 71851308  | 41   |
| chr9 | 76691731  | 76692064  | 334    | 76691906  | 31   |
| chr9 | 80830919  | 80831381  | 463    | 80831204  | 25   |
| chr9 | 94246741  | 94247030  | 290    | 94246872  | 29   |
| chr9 | 95414839  | 95415107  | 269    | 95414942  | 20   |
| chr9 | 97279505  | 97279862  | 358    | 97279701  | 36   |
| chr9 | 97567089  | 97567355  | 267    | 97567225  | 27   |
| chr9 | 101300949 | 101301606 | 658    | 101301274 | 25   |
| chr9 | 103093223 | 103093682 | 460    | 103093378 | 20   |
| chr9 | 110546058 | 110546567 | 510    | 110546238 | 100  |
| chr9 | 112840032 | 112840506 | 475    | 112840238 | 24   |
| chr9 | 116145607 | 116145889 | 283    | 116145760 | 23   |
| chr9 | 121857418 | 121858131 | 714    | 121857790 | 29   |
| chr9 | 126581562 | 126582031 | 470    | 126581720 | 27   |
| chr9 | 126669901 | 126670185 | 285    | 126670057 | 25   |
| chr9 | 128303057 | 128303789 | 733    | 128303413 | 41   |
| chr9 | 128315538 | 128315876 | 339    | 128315684 | 24   |
| chr9 | 128464629 | 128465147 | 519    | 128464821 | 35   |
| chr9 | 128496372 | 128496873 | 502    | 128496532 | 30   |
| chr9 | 132001525 | 132002108 | 584    | 132001822 | 24   |
| chr9 | 132397598 | 132397954 | 357    | 132397806 | 39   |
| chr9 | 132540821 | 132541091 | 271    | 132540960 | 21   |
| chr9 | 133316298 | 133316644 | 347    | 133316513 | 16   |
| chr9 | 133568178 | 133568551 | 374    | 133568309 | 15   |
| chr9 | 133934322 | 133934583 | 262    | 133934453 | 31   |
| chr9 | 136253661 | 136253990 | 330    | 136253864 | 33   |
| chr9 | 139161145 | 139161729 | 585    | 139161501 | 42   |
| chr9 | 139240223 | 139240630 | 408    | 139240414 | 27   |
| chrX | 2857256   | 2857591   | 336    | 2857421   | 11   |
| chrX | 11635363  | 11635875  | 513    | 11635729  | 24   |
| chrX | 12522460  | 12522786  | 327    | 12522577  | 11   |
| chrX | 13580935  | 13581511  | 577    | 13581266  | 19   |



| Chr  | Start     | End       | Length | Summit    | Tags |
|------|-----------|-----------|--------|-----------|------|
| chrX | 16810721  | 16811186  | 466    | 16811056  | 16   |
| chrX | 19873559  | 19874237  | 679    | 19873888  | 21   |
| chrX | 21256338  | 21256744  | 407    | 21256543  | 16   |
| chrX | 23166718  | 23167331  | 614    | 23167006  | 21   |
| chrX | 23825686  | 23825889  | 204    | 23825788  | 10   |
| chrX | 23828492  | 23828757  | 266    | 23828642  | 18   |
| chrX | 24575355  | 24575616  | 262    | 24575486  | 10   |
| chrX | 26247795  | 26248336  | 542    | 26248032  | 23   |
| chrX | 39806797  | 39807047  | 251    | 39806922  | 11   |
| chrX | 40754537  | 40755031  | 495    | 40754804  | 12   |
| chrX | 41077213  | 41077539  | 327    | 41077409  | 16   |
| chrX | 42174479  | 42174920  | 442    | 42174608  | 12   |
| chrX | 42632604  | 42633339  | 736    | 42632991  | 49   |
| chrX | 45596185  | 45596452  | 268    | 45596309  | 12   |
| chrX | 48083014  | 48083323  | 310    | 48083140  | 18   |
| chrX | 52734927  | 52735159  | 233    | 52735043  | 11   |
| chrX | 52814828  | 52815091  | 264    | 52814961  | 21   |
| chrX | 56632062  | 56632251  | 190    | 56632157  | 11   |
| chrX | 63273895  | 63274197  | 303    | 63274054  | 14   |
| chrX | 64756566  | 64757236  | 671    | 64756878  | 30   |
| chrX | 65112003  | 65112602  | 600    | 65112297  | 14   |
| chrX | 65775001  | 65775468  | 468    | 65775306  | 13   |
| chrX | 66079620  | 66079934  | 315    | 66079811  | 12   |
| chrX | 72517616  | 72518135  | 520    | 72517975  | 31   |
| chrX | 75564584  | 75564956  | 373    | 75564706  | 10   |
| chrX | 76183398  | 76183634  | 237    | 76183516  | 10   |
| chrX | 79069275  | 79069603  | 329    | 79069392  | 18   |
| chrX | 84671041  | 84671654  | 614    | 84671325  | 16   |
| chrX | 92769330  | 92769752  | 423    | 92769424  | 15   |
| chrX | 93081642  | 93081948  | 307    | 93081819  | 12   |
| chrX | 105599311 | 105599988 | 678    | 105599628 | 29   |
| chrX | 109297816 | 109298042 | 227    | 109297929 | 12   |
| chrX | 109951855 | 109952316 | 462    | 109952189 | 24   |
| chrX | 111809946 | 111810190 | 245    | 111810068 | 16   |
| chrX | 113841546 | 113841822 | 277    | 113841693 | 14   |
| chrX | 115964489 | 115964968 | 480    | 115964846 | 17   |
| chrX | 118486153 | 118486506 | 354    | 118486313 | 10   |
| chrX | 118526005 | 118526248 | 244    | 118526127 | 17   |
| chrX | 132316267 | 132316630 | 364    | 132316418 | 10   |
| chrX | 132377103 | 132377643 | 541    | 132377281 | 35   |
| chrX | 149818217 | 149818621 | 405    | 149818427 | 26   |
| chrY | 1788094   | 1788360   | 267    | 1788220   | 16   |
| chrY | 6555094   | 6555552   | 459    | 6555300   | 10   |
| chrY | 7087446   | 7088024   | 579    | 7087729   | 13   |
| chrY | 7183019   | 7183493   | 475    | 7183169   | 21   |
| chrY | 8067776   | 8068052   | 277    | 8067921   | 14   |
| chrY | 18810587  | 18810811  | 225    | 18810699  | 10   |
| chrY | 19735806  | 19736020  | 215    | 19735913  | 10   |
| chrY | 22900410  | 22900877  | 468    | 22900746  | 21   |
| chr1 | 896419    | 897099    | 681    | 896746    | 47   |
| chr1 | 1524591   | 1525406   | 816    | 1525030   | 53   |
| chr1 | 2054433   | 2054940   | 508    | 2054608   | 40   |
| chr1 | 2148502   | 2150594   | 2093   | 2149733   | 88   |

| Chr  | Start    | End      | Length | Summit   | Tags |
|------|----------|----------|--------|----------|------|
| chr1 | 2172915  | 2173457  | 543    | 2173296  | 36   |
| chr1 | 2257216  | 2257912  | 697    | 2257572  | 33   |
| chr1 | 3366444  | 3366822  | 379    | 3366605  | 33   |
| chr1 | 4662686  | 4663144  | 459    | 4662968  | 23   |
| chr1 | 6218092  | 6218948  | 857    | 6218688  | 53   |
| chr1 | 6585434  | 6586062  | 629    | 6585652  | 54   |
| chr1 | 9396106  | 9396432  | 327    | 9396301  | 29   |
| chr1 | 9432965  | 9433408  | 444    | 9433236  | 36   |
| chr1 | 9818791  | 9819638  | 848    | 9818982  | 99   |
| chr1 | 9852452  | 9852947  | 496    | 9852623  | 83   |
| chr1 | 10604526 | 10605001 | 476    | 10604737 | 39   |
| chr1 | 10626063 | 10626592 | 530    | 10626427 | 39   |
| chr1 | 10627238 | 10627928 | 691    | 10627550 | 42   |
| chr1 | 10902747 | 10903179 | 433    | 10903051 | 26   |
| chr1 | 11042448 | 11043036 | 589    | 11042764 | 31   |
| chr1 | 12189531 | 12190243 | 713    | 12189926 | 83   |
| chr1 | 13948655 | 13949278 | 624    | 13949006 | 22   |
| chr1 | 13999999 | 14000697 | 699    | 14000567 | 43   |
| chr1 | 14912138 | 14912481 | 344    | 14912351 | 23   |
| chr1 | 15791470 | 15791795 | 326    | 15791648 | 22   |
| chr1 | 15816329 | 15817018 | 690    | 15816542 | 60   |
| chr1 | 16029829 | 16030224 | 396    | 16030094 | 24   |
| chr1 | 16435897 | 16436459 | 563    | 16436255 | 32   |
| chr1 | 16682202 | 16682728 | 527    | 16682515 | 40   |
| chr1 | 16822712 | 16823799 | 1088   | 16823206 | 175  |
| chr1 | 17147271 | 17148091 | 821    | 17147783 | 89   |
| chr1 | 17210625 | 17211456 | 832    | 17211072 | 46   |
| chr1 | 17882488 | 17882909 | 422    | 17882780 | 36   |
| chr1 | 18156813 | 18157340 | 528    | 18157170 | 24   |
| chr1 | 19080882 | 19081585 | 704    | 19081297 | 74   |
| chr1 | 19560256 | 19560716 | 461    | 19560551 | 36   |
| chr1 | 19684414 | 19685459 | 1046   | 19685117 | 51   |
| chr1 | 21813596 | 21814321 | 726    | 21813971 | 54   |
| chr1 | 22136170 | 22136872 | 703    | 22136525 | 61   |
| chr1 | 22336201 | 22336966 | 766    | 22336702 | 83   |
| chr1 | 22427427 | 22428111 | 685    | 22427775 | 41   |
| chr1 | 22437939 | 22438898 | 960    | 22438643 | 63   |
| chr1 | 22452918 | 22453256 | 339    | 22453094 | 66   |
| chr1 | 23028107 | 23028570 | 464    | 23028340 | 53   |
| chr1 | 23029231 | 23029802 | 572    | 23029441 | 35   |
| chr1 | 23366316 | 23367394 | 1079   | 23366629 | 71   |
| chr1 | 23368754 | 23369019 | 266    | 23368882 | 20   |
| chr1 | 23602824 | 23603248 | 425    | 23602948 | 35   |
| chr1 | 24701584 | 24702391 | 808    | 24702030 | 37   |
| chr1 | 25767334 | 25767876 | 543    | 25767538 | 32   |
| chr1 | 25947500 | 25948097 | 598    | 25947847 | 53   |
| chr1 | 26741314 | 26741815 | 502    | 26741556 | 38   |
| chr1 | 27725107 | 27725446 | 340    | 27725296 | 51   |
| chr1 | 28029745 | 28030063 | 319    | 28029848 | 19   |
| chr1 | 29380365 | 29381322 | 958    | 29381109 | 49   |
| chr1 | 29955230 | 29955615 | 386    | 29955434 | 38   |
| chr1 | 31310910 | 31311472 | 563    | 31311274 | 61   |
| chr1 | 31813268 | 31813744 | 477    | 31813413 | 29   |

| Chr  | Start     | End       | Length | Summit    | Tags |
|------|-----------|-----------|--------|-----------|------|
| chr1 | 32999210  | 32999790  | 581    | 32999564  | 30   |
| chr1 | 33757456  | 33758201  | 746    | 33757622  | 92   |
| chr1 | 36073574  | 36073908  | 335    | 36073758  | 16   |
| chr1 | 38364302  | 38364832  | 531    | 38364641  | 26   |
| chr1 | 38751078  | 38751471  | 394    | 38751270  | 35   |
| chr1 | 40198752  | 40199310  | 559    | 40199145  | 32   |
| chr1 | 40208181  | 40208485  | 305    | 40208335  | 50   |
| chr1 | 40335240  | 40335760  | 521    | 40335604  | 24   |
| chr1 | 40541682  | 40542202  | 521    | 40541821  | 41   |
| chr1 | 41650974  | 41651353  | 380    | 41651117  | 29   |
| chr1 | 41657164  | 41657887  | 724    | 41657605  | 71   |
| chr1 | 41712791  | 41713310  | 520    | 41712990  | 32   |
| chr1 | 41916890  | 41917125  | 236    | 41917008  | 35   |
| chr1 | 42573271  | 42573951  | 681    | 42573597  | 33   |
| chr1 | 43055025  | 43055824  | 800    | 43055647  | 39   |
| chr1 | 43303350  | 43303758  | 409    | 43303543  | 91   |
| chr1 | 44499355  | 44499674  | 320    | 44499485  | 21   |
| chr1 | 46456765  | 46457104  | 340    | 46456921  | 22   |
| chr1 | 51198114  | 51198786  | 673    | 51198628  | 41   |
| chr1 | 51553083  | 51553636  | 554    | 51553392  | 68   |
| chr1 | 52964553  | 52965071  | 519    | 52964705  | 29   |
| chr1 | 54819834  | 54820369  | 536    | 54820149  | 47   |
| chr1 | 59345876  | 59346231  | 356    | 59346027  | 41   |
| chr1 | 60003232  | 60003604  | 373    | 60003458  | 25   |
| chr1 | 61687301  | 61687617  | 317    | 61687428  | 30   |
| chr1 | 63022190  | 63022559  | 370    | 63022412  | 25   |
| chr1 | 67291350  | 67292210  | 861    | 67291475  | 37   |
| chr1 | 67811055  | 67811342  | 288    | 67811217  | 26   |
| chr1 | 68735211  | 68735586  | 376    | 68735379  | 18   |
| chr1 | 69293569  | 69293868  | 300    | 69293694  | 14   |
| chr1 | 85186103  | 85186598  | 496    | 85186443  | 56   |
| chr1 | 86343211  | 86343830  | 620    | 86343574  | 38   |
| chr1 | 87566589  | 87567559  | 971    | 87566862  | 52   |
| chr1 | 89230595  | 89231571  | 977    | 89231102  | 72   |
| chr1 | 90818345  | 90818646  | 302    | 90818501  | 23   |
| chr1 | 92123801  | 92124567  | 767    | 92124144  | 29   |
| chr1 | 94147399  | 94147974  | 576    | 94147711  | 28   |
| chr1 | 98899498  | 98900454  | 957    | 98899760  | 40   |
| chr1 | 99818584  | 99819079  | 496    | 99818745  | 67   |
| chr1 | 102898175 | 102898653 | 479    | 102898432 | 16   |
| chr1 | 110328522 | 110329580 | 1059   | 110328920 | 53   |
| chr1 | 110603995 | 110604328 | 334    | 110604149 | 46   |
| chr1 | 111483970 | 111484530 | 561    | 111484322 | 39   |
| chr1 | 112405308 | 112405650 | 343    | 112405438 | 57   |
| chr1 | 112702935 | 112703417 | 483    | 112703092 | 48   |
| chr1 | 115147289 | 115147533 | 245    | 115147411 | 17   |
| chr1 | 115969373 | 115969819 | 447    | 115969694 | 20   |
| chr1 | 116115969 | 116116402 | 434    | 116116122 | 45   |
| chr1 | 116588974 | 116589291 | 318    | 116589165 | 18   |
| chr1 | 117037945 | 117038472 | 528    | 117038162 | 38   |
| chr1 | 117710701 | 117711637 | 937    | 117711076 | 49   |
| chr1 | 148773118 | 148773581 | 464    | 148773261 | 67   |
| chr1 | 148776916 | 148777588 | 673    | 148777255 | 41   |

| <b>Chr</b> | <b>Start</b> | <b>End</b> | <b>Length</b> | <b>Summit</b> | <b>Tags</b> |
|------------|--------------|------------|---------------|---------------|-------------|
| chr1       | 148863286    | 148863719  | 434           | 148863556     | 25          |
| chr1       | 149118399    | 149118636  | 238           | 149118518     | 11          |
| chr1       | 149287396    | 149287930  | 535           | 149287615     | 28          |
| chr1       | 151014011    | 151014498  | 488           | 151014164     | 32          |
| chr1       | 152197325    | 152197917  | 593           | 152197722     | 36          |
| chr1       | 152459471    | 152460101  | 631           | 152459826     | 26          |
| chr1       | 153251159    | 153251580  | 422           | 153251283     | 29          |
| chr1       | 153374157    | 153374510  | 354           | 153374308     | 39          |
| chr1       | 154340400    | 154340858  | 459           | 154340656     | 43          |
| chr1       | 154538015    | 154538459  | 445           | 154538311     | 18          |
| chr1       | 154928114    | 154928451  | 338           | 154928311     | 26          |
| chr1       | 155331983    | 155332332  | 350           | 155332168     | 36          |
| chr1       | 158180672    | 158181165  | 494           | 158180809     | 40          |
| chr1       | 159004147    | 159004699  | 553           | 159004320     | 54          |
| chr1       | 159309999    | 159310708  | 710           | 159310346     | 26          |
| chr1       | 165950032    | 165950562  | 531           | 165950193     | 76          |
| chr1       | 168624197    | 168624662  | 466           | 168624379     | 19          |
| chr1       | 170712053    | 170712312  | 260           | 170712183     | 24          |
| chr1       | 171712387    | 171713452  | 1066          | 171713075     | 48          |
| chr1       | 172103818    | 172104722  | 905           | 172103973     | 45          |
| chr1       | 172394878    | 172395812  | 935           | 172395102     | 45          |
| chr1       | 174442217    | 174443369  | 1153          | 174443012     | 57          |
| chr1       | 179340778    | 179341489  | 712           | 179341118     | 43          |
| chr1       | 181178083    | 181178321  | 239           | 181178202     | 10          |
| chr1       | 181454626    | 181454939  | 314           | 181454751     | 23          |
| chr1       | 182040706    | 182041108  | 403           | 182040852     | 32          |
| chr1       | 183639980    | 183640282  | 303           | 183640135     | 17          |
| chr1       | 186078650    | 186078856  | 207           | 186078753     | 12          |
| chr1       | 193094712    | 193095251  | 540           | 193095029     | 15          |
| chr1       | 196010945    | 196011591  | 647           | 196011236     | 29          |
| chr1       | 198462658    | 198462989  | 332           | 198462859     | 41          |
| chr1       | 199331551    | 199332083  | 533           | 199331888     | 29          |
| chr1       | 199580691    | 199581193  | 503           | 199580911     | 62          |
| chr1       | 199697583    | 199697996  | 414           | 199697850     | 33          |
| chr1       | 199712253    | 199712725  | 473           | 199712529     | 56          |
| chr1       | 200503864    | 200504293  | 430           | 200504046     | 54          |
| chr1       | 201162701    | 201163245  | 545           | 201163010     | 24          |
| chr1       | 202390341    | 202390816  | 476           | 202390478     | 31          |
| chr1       | 202536970    | 202537517  | 548           | 202537200     | 32          |
| chr1       | 202602651    | 202602930  | 280           | 202602782     | 52          |
| chr1       | 202678987    | 202679396  | 410           | 202679206     | 96          |
| chr1       | 203249859    | 203250140  | 282           | 203250018     | 37          |
| chr1       | 204717573    | 204718186  | 614           | 204717919     | 39          |
| chr1       | 204722395    | 204723163  | 769           | 204722763     | 49          |
| chr1       | 205201459    | 205201937  | 479           | 205201797     | 35          |
| chr1       | 205480655    | 205480966  | 312           | 205480839     | 20          |
| chr1       | 205947247    | 205947606  | 360           | 205947412     | 23          |
| chr1       | 206048339    | 206048628  | 290           | 206048475     | 34          |
| chr1       | 207893004    | 207893258  | 255           | 207893131     | 32          |
| chr1       | 212679449    | 212679738  | 290           | 212679600     | 26          |
| chr1       | 216841026    | 216841334  | 309           | 216841186     | 21          |
| chr1       | 221054843    | 221055200  | 358           | 221055070     | 41          |
| chr1       | 221595790    | 221596086  | 297           | 221595917     | 30          |

| Chr   | Start     | End       | Length | Summit    | Tags |
|-------|-----------|-----------|--------|-----------|------|
| chr1  | 222435036 | 222435431 | 396    | 222435285 | 19   |
| chr1  | 223633361 | 223633604 | 244    | 223633483 | 27   |
| chr1  | 225194217 | 225194861 | 645    | 225194505 | 37   |
| chr1  | 226200418 | 226201213 | 796    | 226200818 | 104  |
| chr1  | 226428154 | 226429150 | 997    | 226428839 | 64   |
| chr1  | 228269043 | 228269947 | 905    | 228269597 | 41   |
| chr1  | 228289350 | 228289692 | 343    | 228289563 | 20   |
| chr1  | 228559730 | 228560135 | 406    | 228559960 | 23   |
| chr1  | 228844571 | 228845162 | 592    | 228844818 | 26   |
| chr1  | 230521467 | 230521876 | 410    | 230521644 | 57   |
| chr1  | 232740938 | 232741578 | 641    | 232741267 | 45   |
| chr1  | 232802318 | 232802737 | 420    | 232802545 | 31   |
| chr1  | 241717261 | 241717899 | 639    | 241717599 | 32   |
| chr1  | 243199869 | 243201123 | 1255   | 243200306 | 50   |
| chr10 | 1090716   | 1091026   | 311    | 1090896   | 33   |
| chr10 | 1321643   | 1322219   | 577    | 1322074   | 49   |
| chr10 | 1633025   | 1633446   | 422    | 1633283   | 38   |
| chr10 | 5556648   | 5557206   | 559    | 5556834   | 32   |
| chr10 | 5604381   | 5605001   | 621    | 5604689   | 31   |
| chr10 | 5692640   | 5692980   | 341    | 5692808   | 23   |
| chr10 | 5766621   | 5767206   | 586    | 5766889   | 22   |
| chr10 | 8135308   | 8135826   | 519    | 8135464   | 39   |
| chr10 | 11824188  | 11824833  | 646    | 11824424  | 44   |
| chr10 | 11839520  | 11840447  | 928    | 11840200  | 45   |
| chr10 | 11957651  | 11958169  | 519    | 11958000  | 37   |
| chr10 | 13148597  | 13148858  | 262    | 13148728  | 15   |
| chr10 | 14468188  | 14468438  | 251    | 14468313  | 21   |
| chr10 | 16898997  | 16899766  | 770    | 16899378  | 43   |
| chr10 | 20162129  | 20162449  | 321    | 20162301  | 53   |
| chr10 | 21862668  | 21863411  | 744    | 21863045  | 33   |
| chr10 | 21863716  | 21864527  | 812    | 21864257  | 27   |
| chr10 | 23748909  | 23749273  | 365    | 23749125  | 22   |
| chr10 | 24881279  | 24881718  | 440    | 24881433  | 31   |
| chr10 | 25052377  | 25052924  | 548    | 25052714  | 19   |
| chr10 | 28716013  | 28716441  | 429    | 28716319  | 18   |
| chr10 | 28997655  | 28998077  | 423    | 28997793  | 22   |
| chr10 | 29738498  | 29739065  | 568    | 29738773  | 22   |
| chr10 | 29936600  | 29936872  | 273    | 29936708  | 21   |
| chr10 | 30697029  | 30697603  | 575    | 30697187  | 68   |
| chr10 | 31361288  | 31361633  | 346    | 31361457  | 35   |
| chr10 | 35072702  | 35073112  | 411    | 35072878  | 34   |
| chr10 | 43212125  | 43213058  | 934    | 43212791  | 40   |
| chr10 | 43267639  | 43267972  | 334    | 43267766  | 20   |
| chr10 | 46422297  | 46422939  | 643    | 46422675  | 66   |
| chr10 | 46599722  | 46600180  | 459    | 46600050  | 39   |
| chr10 | 47211595  | 47212330  | 736    | 47211961  | 41   |
| chr10 | 47869145  | 47869693  | 549    | 47869326  | 36   |
| chr10 | 48331959  | 48332244  | 286    | 48332076  | 11   |
| chr10 | 48875851  | 48876419  | 569    | 48876177  | 26   |
| chr10 | 49129616  | 49130120  | 505    | 49129794  | 23   |
| chr10 | 49534331  | 49534887  | 557    | 49534507  | 56   |
| chr10 | 52053270  | 52054115  | 846    | 52053724  | 48   |
| chr10 | 63332660  | 63333336  | 677    | 63332862  | 46   |

| Chr   | Start     | End       | Length | Summit    | Tags |
|-------|-----------|-----------|--------|-----------|------|
| chr10 | 64234329  | 64235099  | 771    | 64234781  | 80   |
| chr10 | 64354092  | 64354541  | 450    | 64354242  | 33   |
| chr10 | 64895119  | 64896017  | 899    | 64895800  | 32   |
| chr10 | 68124814  | 68125119  | 306    | 68124997  | 12   |
| chr10 | 70767479  | 70767998  | 520    | 70767664  | 51   |
| chr10 | 72695890  | 72696511  | 622    | 72696257  | 35   |
| chr10 | 73297951  | 73298387  | 437    | 73298081  | 32   |
| chr10 | 73439074  | 73439459  | 386    | 73439243  | 34   |
| chr10 | 76487719  | 76488330  | 612    | 76488053  | 40   |
| chr10 | 76541019  | 76541597  | 579    | 76541236  | 30   |
| chr10 | 80715874  | 80716547  | 674    | 80716259  | 50   |
| chr10 | 82163364  | 82163697  | 334    | 82163533  | 35   |
| chr10 | 84099050  | 84099684  | 635    | 84099360  | 19   |
| chr10 | 88771360  | 88771970  | 611    | 88771677  | 38   |
| chr10 | 89612803  | 89613689  | 887    | 89613056  | 85   |
| chr10 | 96151955  | 96153000  | 1046   | 96152193  | 54   |
| chr10 | 96997562  | 96998025  | 464    | 96997777  | 36   |
| chr10 | 97044908  | 97045494  | 587    | 97045166  | 51   |
| chr10 | 97310861  | 97311492  | 632    | 97311272  | 31   |
| chr10 | 98255271  | 98255516  | 246    | 98255394  | 18   |
| chr10 | 98582123  | 98582851  | 729    | 98582652  | 31   |
| chr10 | 98819654  | 98820166  | 513    | 98819784  | 29   |
| chr10 | 99217963  | 99218273  | 311    | 99218131  | 43   |
| chr10 | 99333824  | 99334150  | 327    | 99333975  | 26   |
| chr10 | 103975816 | 103976183 | 368    | 103976062 | 24   |
| chr10 | 105521384 | 105521833 | 450    | 105521629 | 24   |
| chr10 | 111644306 | 111644568 | 263    | 111644437 | 19   |
| chr10 | 113933259 | 113933844 | 586    | 113933540 | 25   |
| chr10 | 120853234 | 120854134 | 901    | 120853632 | 45   |
| chr10 | 122712632 | 122713276 | 645    | 122712915 | 45   |
| chr10 | 123724047 | 123724951 | 905    | 123724336 | 56   |
| chr10 | 124043515 | 124043821 | 307    | 124043644 | 27   |
| chr10 | 124240826 | 124241345 | 520    | 124241053 | 65   |
| chr10 | 125150986 | 125151306 | 321    | 125151112 | 15   |
| chr10 | 126311116 | 126311671 | 556    | 126311417 | 37   |
| chr10 | 126327314 | 126327696 | 383    | 126327528 | 25   |
| chr10 | 127545040 | 127545317 | 278    | 127545193 | 17   |
| chr10 | 133646239 | 133646834 | 596    | 133646500 | 19   |
| chr10 | 134059865 | 134060549 | 685    | 134060203 | 30   |
| chr10 | 134234195 | 134235040 | 846    | 134234867 | 63   |
| chr10 | 134527495 | 134528572 | 1078   | 134528399 | 87   |
| chr11 | 737001    | 737669    | 669    | 737334    | 46   |
| chr11 | 786864    | 787576    | 713    | 787213    | 43   |
| chr11 | 982833    | 983246    | 414    | 982958    | 34   |
| chr11 | 1176727   | 1177196   | 470    | 1177060   | 35   |
| chr11 | 1269946   | 1270937   | 992    | 1270250   | 51   |
| chr11 | 1500944   | 1501391   | 448    | 1501064   | 32   |
| chr11 | 1510015   | 1510432   | 418    | 1510197   | 40   |
| chr11 | 1633001   | 1633476   | 476    | 1633317   | 34   |
| chr11 | 2246776   | 2248215   | 1440   | 2247373   | 75   |
| chr11 | 2363020   | 2363659   | 640    | 2363320   | 32   |
| chr11 | 2552497   | 2553075   | 579    | 2552690   | 34   |
| chr11 | 2981576   | 2982196   | 621    | 2981885   | 36   |

| Chr   | Start    | End      | Length | Summit   | Tags |
|-------|----------|----------|--------|----------|------|
| chr11 | 3108311  | 3108931  | 621    | 3108643  | 41   |
| chr11 | 9737628  | 9738177  | 550    | 9737960  | 42   |
| chr11 | 12749091 | 12749613 | 523    | 12749368 | 36   |
| chr11 | 14477696 | 14478067 | 372    | 14477914 | 14   |
| chr11 | 15638626 | 15638943 | 318    | 15638813 | 22   |
| chr11 | 15761697 | 15762044 | 348    | 15761828 | 45   |
| chr11 | 16075729 | 16076044 | 316    | 16075857 | 16   |
| chr11 | 17185925 | 17186454 | 530    | 17186164 | 38   |
| chr11 | 24474936 | 24475598 | 663    | 24475358 | 38   |
| chr11 | 27652180 | 27652420 | 241    | 27652300 | 22   |
| chr11 | 30175966 | 30176386 | 421    | 30176186 | 21   |
| chr11 | 34154504 | 34154807 | 304    | 34154632 | 29   |
| chr11 | 34893958 | 34894866 | 909    | 34894540 | 35   |
| chr11 | 35117715 | 35118058 | 344    | 35117858 | 20   |
| chr11 | 45316078 | 45316390 | 313    | 45316205 | 27   |
| chr11 | 46044546 | 46044876 | 331    | 46044745 | 18   |
| chr11 | 46099432 | 46100159 | 728    | 46099666 | 32   |
| chr11 | 48169396 | 48169690 | 295    | 48169553 | 15   |
| chr11 | 57312344 | 57312814 | 471    | 57312637 | 27   |
| chr11 | 58102027 | 58102289 | 263    | 58102158 | 11   |
| chr11 | 61104770 | 61105721 | 952    | 61105121 | 55   |
| chr11 | 61223770 | 61224418 | 649    | 61224158 | 41   |
| chr11 | 61282323 | 61282841 | 519    | 61282656 | 31   |
| chr11 | 61304780 | 61305456 | 677    | 61305088 | 46   |
| chr11 | 61672385 | 61672883 | 499    | 61672512 | 24   |
| chr11 | 62250512 | 62251759 | 1248   | 62251285 | 68   |
| chr11 | 62310471 | 62311856 | 1386   | 62311625 | 71   |
| chr11 | 63393189 | 63393579 | 391    | 63393393 | 57   |
| chr11 | 63794708 | 63795990 | 1283   | 63795402 | 68   |
| chr11 | 63848063 | 63849058 | 996    | 63848770 | 48   |
| chr11 | 63866221 | 63867028 | 808    | 63866571 | 77   |
| chr11 | 64657939 | 64659029 | 1091   | 64658658 | 58   |
| chr11 | 64898856 | 64899308 | 453    | 64899193 | 21   |
| chr11 | 64966186 | 64966678 | 493    | 64966522 | 27   |
| chr11 | 65021402 | 65021955 | 554    | 65021580 | 37   |
| chr11 | 65310258 | 65311026 | 769    | 65310660 | 53   |
| chr11 | 65889681 | 65890087 | 407    | 65889839 | 49   |
| chr11 | 66788876 | 66789346 | 471    | 66789112 | 30   |
| chr11 | 67029233 | 67030303 | 1071   | 67029916 | 63   |
| chr11 | 67328975 | 67330236 | 1262   | 67329350 | 57   |
| chr11 | 67532609 | 67533233 | 625    | 67533011 | 67   |
| chr11 | 67795837 | 67796501 | 665    | 67796066 | 43   |
| chr11 | 68342084 | 68342607 | 524    | 68342426 | 69   |
| chr11 | 69708118 | 69708486 | 369    | 69708355 | 42   |
| chr11 | 69921989 | 69922591 | 603    | 69922251 | 28   |
| chr11 | 70675155 | 70675826 | 672    | 70675476 | 62   |
| chr11 | 72070234 | 72070503 | 270    | 72070365 | 21   |
| chr11 | 72530319 | 72531905 | 1587   | 72531745 | 87   |
| chr11 | 72583362 | 72583678 | 317    | 72583553 | 30   |
| chr11 | 72671901 | 72672447 | 547    | 72672176 | 47   |
| chr11 | 74739530 | 74740581 | 1052   | 74739919 | 60   |
| chr11 | 76249187 | 76249991 | 805    | 76249393 | 43   |
| chr11 | 82136051 | 82136415 | 365    | 82136245 | 21   |

| Chr   | Start     | End       | Length | Summit    | Tags |
|-------|-----------|-----------|--------|-----------|------|
| chr11 | 93677862  | 93678551  | 690    | 93678243  | 28   |
| chr11 | 94142080  | 94142554  | 475    | 94142221  | 25   |
| chr11 | 94710260  | 94710615  | 356    | 94710479  | 22   |
| chr11 | 109468513 | 109469299 | 787    | 109468682 | 37   |
| chr11 | 110086903 | 110087453 | 551    | 110087212 | 21   |
| chr11 | 111302752 | 111303311 | 560    | 111303103 | 46   |
| chr11 | 112690228 | 112690765 | 538    | 112690378 | 36   |
| chr11 | 113608394 | 113608864 | 471    | 113608545 | 30   |
| chr11 | 113633711 | 113634703 | 993    | 113634351 | 34   |
| chr11 | 113635157 | 113635581 | 425    | 113635286 | 23   |
| chr11 | 115117448 | 115117942 | 495    | 115117595 | 116  |
| chr11 | 117276549 | 117277221 | 673    | 117276870 | 51   |
| chr11 | 117450696 | 117451281 | 586    | 117450941 | 35   |
| chr11 | 119047749 | 119048270 | 522    | 119047910 | 33   |
| chr11 | 119089929 | 119090449 | 521    | 119090225 | 63   |
| chr11 | 119186389 | 119186765 | 377    | 119186603 | 26   |
| chr11 | 119499884 | 119500446 | 563    | 119500054 | 53   |
| chr11 | 120361858 | 120362435 | 578    | 120362241 | 45   |
| chr11 | 122887144 | 122887411 | 268    | 122887285 | 19   |
| chr11 | 125328064 | 125328348 | 285    | 125328204 | 33   |
| chr11 | 125437573 | 125438323 | 751    | 125438087 | 33   |
| chr11 | 128062007 | 128062354 | 348    | 128062179 | 26   |
| chr11 | 129537817 | 129538082 | 266    | 129537960 | 23   |
| chr11 | 130113250 | 130113540 | 291    | 130113417 | 26   |
| chr11 | 130322651 | 130322879 | 229    | 130322765 | 15   |
| chr11 | 130877564 | 130877881 | 318    | 130877722 | 25   |
| chr11 | 133330973 | 133331783 | 811    | 133331395 | 47   |
| chr12 | 593885    | 594383    | 499    | 594253    | 37   |
| chr12 | 3148131   | 3148411   | 281    | 3148293   | 31   |
| chr12 | 3163957   | 3164303   | 347    | 3164130   | 55   |
| chr12 | 4998185   | 4998555   | 371    | 4998406   | 28   |
| chr12 | 6046103   | 6046597   | 495    | 6046273   | 39   |
| chr12 | 6937567   | 6938093   | 527    | 6937807   | 43   |
| chr12 | 6995683   | 6996630   | 948    | 6995851   | 56   |
| chr12 | 8076219   | 8076980   | 762    | 8076560   | 55   |
| chr12 | 8277098   | 8277567   | 470    | 8277325   | 24   |
| chr12 | 9108087   | 9109305   | 1219   | 9109102   | 63   |
| chr12 | 15980992  | 15981360  | 369    | 15981137  | 28   |
| chr12 | 22588140  | 22589052  | 913    | 22588772  | 51   |
| chr12 | 31117725  | 31118382  | 658    | 31118026  | 46   |
| chr12 | 32723146  | 32724190  | 1045   | 32723942  | 46   |
| chr12 | 38838915  | 38839298  | 384    | 38839154  | 45   |
| chr12 | 40824689  | 40825212  | 524    | 40825001  | 27   |
| chr12 | 45063191  | 45064341  | 1151   | 45063996  | 61   |
| chr12 | 45663417  | 45663975  | 559    | 45663769  | 41   |
| chr12 | 46433193  | 46433945  | 753    | 46433539  | 60   |
| chr12 | 46556621  | 46556962  | 342    | 46556839  | 25   |
| chr12 | 47495486  | 47495988  | 503    | 47495653  | 35   |
| chr12 | 48046876  | 48047665  | 790    | 48047349  | 30   |
| chr12 | 49322738  | 49323181  | 444    | 49323000  | 24   |
| chr12 | 50248119  | 50248378  | 260    | 50248249  | 17   |
| chr12 | 51217238  | 51217682  | 445    | 51217361  | 24   |
| chr12 | 51860450  | 51861240  | 791    | 51860874  | 51   |



| Chr   | Start     | End       | Length | Summit    | Tags |
|-------|-----------|-----------|--------|-----------|------|
| chr12 | 51912782  | 51913414  | 633    | 51913102  | 47   |
| chr12 | 52062042  | 52062632  | 591    | 52062212  | 48   |
| chr12 | 55807701  | 55808071  | 371    | 55807863  | 58   |
| chr12 | 55923639  | 55923976  | 338    | 55923857  | 31   |
| chr12 | 56299506  | 56300156  | 651    | 56299796  | 40   |
| chr12 | 57521332  | 57521860  | 529    | 57521708  | 36   |
| chr12 | 58275960  | 58276430  | 471    | 58276145  | 24   |
| chr12 | 63069268  | 63069699  | 432    | 63069413  | 28   |
| chr12 | 63084177  | 63085147  | 971    | 63084397  | 59   |
| chr12 | 66812016  | 66812573  | 558    | 66812234  | 32   |
| chr12 | 68237555  | 68237775  | 221    | 68237665  | 12   |
| chr12 | 70434648  | 70435227  | 580    | 70434846  | 35   |
| chr12 | 73082870  | 73083414  | 545    | 73083100  | 17   |
| chr12 | 89152409  | 89152745  | 337    | 89152526  | 19   |
| chr12 | 91471224  | 91471624  | 401    | 91471429  | 35   |
| chr12 | 92385284  | 92385764  | 481    | 92385607  | 30   |
| chr12 | 95233961  | 95234630  | 670    | 95234277  | 31   |
| chr12 | 95407357  | 95407655  | 299    | 95407486  | 35   |
| chr12 | 101324084 | 101324384 | 301    | 101324209 | 12   |
| chr12 | 104025367 | 104026015 | 649    | 104025639 | 38   |
| chr12 | 104546350 | 104546848 | 499    | 104546633 | 23   |
| chr12 | 105145574 | 105145941 | 368    | 105145728 | 43   |
| chr12 | 106155187 | 106155443 | 257    | 106155315 | 16   |
| chr12 | 106603551 | 106604051 | 501    | 106603691 | 31   |
| chr12 | 106678590 | 106679368 | 779    | 106679125 | 46   |
| chr12 | 108504921 | 108505213 | 293    | 108505032 | 26   |
| chr12 | 108635624 | 108636158 | 535    | 108635786 | 37   |
| chr12 | 108787038 | 108787308 | 271    | 108787178 | 20   |
| chr12 | 109169695 | 109170345 | 651    | 109169967 | 79   |
| chr12 | 109390269 | 109390555 | 287    | 109390393 | 26   |
| chr12 | 110521453 | 110521936 | 484    | 110521608 | 21   |
| chr12 | 112257057 | 112257503 | 447    | 112257347 | 40   |
| chr12 | 118910890 | 118912402 | 1513   | 118912110 | 105  |
| chr12 | 119141206 | 119141744 | 539    | 119141399 | 33   |
| chr12 | 119884202 | 119884471 | 270    | 119884324 | 27   |
| chr12 | 120374465 | 120374966 | 502    | 120374601 | 40   |
| chr12 | 120708518 | 120708890 | 373    | 120708769 | 23   |
| chr12 | 120861453 | 120861744 | 292    | 120861607 | 19   |
| chr12 | 123175979 | 123176453 | 475    | 123176142 | 30   |
| chr12 | 123617732 | 123618599 | 868    | 123618306 | 53   |
| chr12 | 123656946 | 123657427 | 482    | 123657091 | 25   |
| chr12 | 123955295 | 123955554 | 260    | 123955425 | 28   |
| chr12 | 123965304 | 123965677 | 374    | 123965429 | 27   |
| chr12 | 123989073 | 123989381 | 309    | 123989251 | 18   |
| chr12 | 124115657 | 124116516 | 860    | 124115787 | 34   |
| chr12 | 130605719 | 130606427 | 709    | 130606047 | 53   |
| chr12 | 130606884 | 130607397 | 514    | 130607074 | 53   |
| chr12 | 131516882 | 131517376 | 495    | 131517142 | 22   |
| chr12 | 131579758 | 131580418 | 661    | 131580093 | 36   |
| chr13 | 22847229  | 22848015  | 787    | 22847820  | 49   |
| chr13 | 23746647  | 23746897  | 251    | 23746772  | 21   |
| chr13 | 26643748  | 26644562  | 815    | 26644081  | 46   |
| chr13 | 26896565  | 26897164  | 600    | 26896814  | 82   |

| <b>Chr</b> | <b>Start</b> | <b>End</b> | <b>Length</b> | <b>Summit</b> | <b>Tags</b> |
|------------|--------------|------------|---------------|---------------|-------------|
| chr13      | 27610139     | 27611678   | 1540          | 27611309      | 71          |
| chr13      | 29165748     | 29166092   | 345           | 29165931      | 65          |
| chr13      | 29396367     | 29396806   | 440           | 29396506      | 20          |
| chr13      | 31506027     | 31506352   | 326           | 31506223      | 45          |
| chr13      | 32058319     | 32058819   | 501           | 32058467      | 21          |
| chr13      | 33413052     | 33413332   | 281           | 33413182      | 11          |
| chr13      | 35603063     | 35603713   | 651           | 35603418      | 23          |
| chr13      | 39184893     | 39185127   | 235           | 39185010      | 10          |
| chr13      | 39532448     | 39532762   | 315           | 39532633      | 28          |
| chr13      | 40138454     | 40139134   | 681           | 40138796      | 32          |
| chr13      | 42168308     | 42168573   | 266           | 42168443      | 26          |
| chr13      | 43907205     | 43907673   | 469           | 43907412      | 20          |
| chr13      | 47595974     | 47596243   | 270           | 47596088      | 24          |
| chr13      | 49100373     | 49100695   | 323           | 49100494      | 21          |
| chr13      | 49468758     | 49469749   | 992           | 49468915      | 42          |
| chr13      | 51298599     | 51299106   | 508           | 51298941      | 22          |
| chr13      | 51398681     | 51398930   | 250           | 51398806      | 24          |
| chr13      | 51906518     | 51906815   | 298           | 51906648      | 12          |
| chr13      | 58114578     | 58114939   | 362           | 58114704      | 10          |
| chr13      | 66325849     | 66326081   | 233           | 66325965      | 10          |
| chr13      | 83918038     | 83918272   | 235           | 83918155      | 19          |
| chr13      | 87427310     | 87427830   | 521           | 87427637      | 19          |
| chr13      | 94046222     | 94046702   | 481           | 94046574      | 23          |
| chr13      | 96560166     | 96560479   | 314           | 96560295      | 26          |
| chr13      | 97426480     | 97427345   | 866           | 97426733      | 35          |
| chr13      | 97893549     | 97893941   | 393           | 97893719      | 39          |
| chr13      | 98126025     | 98126599   | 575           | 98126337      | 41          |
| chr13      | 109236453    | 109237549  | 1097          | 109237260     | 54          |
| chr13      | 109929356    | 109929849  | 494           | 109929709     | 36          |
| chr13      | 112618695    | 112619132  | 438           | 112618810     | 19          |
| chr13      | 112991204    | 112991502  | 299           | 112991372     | 26          |
| chr13      | 113546636    | 113548143  | 1508          | 113546899     | 77          |
| chr13      | 113548670    | 113549330  | 661           | 113549022     | 49          |
| chr13      | 113565448    | 113565956  | 509           | 113565825     | 43          |
| chr13      | 113815042    | 113815604  | 563           | 113815392     | 36          |
| chr14      | 22425791     | 22426312   | 522           | 22426161      | 36          |
| chr14      | 23512264     | 23512642   | 379           | 23512381      | 35          |
| chr14      | 23854824     | 23855518   | 695           | 23855107      | 97          |
| chr14      | 34521331     | 34521676   | 346           | 34521517      | 28          |
| chr14      | 34875546     | 34876221   | 676           | 34875939      | 64          |
| chr14      | 44228659     | 44228911   | 253           | 44228785      | 13          |
| chr14      | 49652882     | 49653264   | 383           | 49653075      | 17          |
| chr14      | 52231681     | 52232490   | 810           | 52232172      | 48          |
| chr14      | 53499902     | 53500433   | 532           | 53500304      | 32          |
| chr14      | 54025189     | 54025636   | 448           | 54025505      | 19          |
| chr14      | 61287421     | 61287948   | 528           | 61287635      | 38          |
| chr14      | 63597028     | 63597450   | 423           | 63597159      | 20          |
| chr14      | 64039917     | 64040936   | 1020          | 64040201      | 75          |
| chr14      | 64638874     | 64639357   | 484           | 64639030      | 35          |
| chr14      | 65915649     | 65915896   | 248           | 65915773      | 14          |
| chr14      | 66469150     | 66469433   | 284           | 66469271      | 11          |
| chr14      | 69096227     | 69096465   | 239           | 69096346      | 22          |
| chr14      | 69791025     | 69791477   | 453           | 69791155      | 14          |

| Chr   | Start     | End       | Length | Summit    | Tags |
|-------|-----------|-----------|--------|-----------|------|
| chr14 | 74104169  | 74104597  | 429    | 74104380  | 33   |
| chr14 | 74663095  | 74663691  | 597    | 74663291  | 25   |
| chr14 | 74790891  | 74791416  | 526    | 74791205  | 39   |
| chr14 | 74816275  | 74816725  | 451    | 74816406  | 27   |
| chr14 | 75197217  | 75197691  | 475    | 75197348  | 40   |
| chr14 | 76495486  | 76495736  | 251    | 76495611  | 26   |
| chr14 | 76564182  | 76565100  | 919    | 76564736  | 72   |
| chr14 | 76856269  | 76857655  | 1387   | 76857423  | 83   |
| chr14 | 77335939  | 77336701  | 763    | 77336144  | 70   |
| chr14 | 80706237  | 80706709  | 473    | 80706572  | 22   |
| chr14 | 88953142  | 88953682  | 541    | 88953273  | 39   |
| chr14 | 89002999  | 89003516  | 518    | 89003192  | 36   |
| chr14 | 89491828  | 89492265  | 438    | 89491999  | 27   |
| chr14 | 90156112  | 90156370  | 259    | 90156241  | 27   |
| chr14 | 90756555  | 90757174  | 620    | 90756861  | 47   |
| chr14 | 90813675  | 90814212  | 538    | 90813836  | 78   |
| chr14 | 90906129  | 90906644  | 516    | 90906456  | 26   |
| chr14 | 90913041  | 90913688  | 648    | 90913357  | 29   |
| chr14 | 91046173  | 91047033  | 861    | 91046616  | 49   |
| chr14 | 92329995  | 92330695  | 701    | 92330216  | 35   |
| chr14 | 92523831  | 92524416  | 586    | 92524089  | 37   |
| chr14 | 92542035  | 92542555  | 521    | 92542220  | 48   |
| chr14 | 92720409  | 92721441  | 1033   | 92721246  | 53   |
| chr14 | 95927640  | 95928469  | 830    | 95928031  | 82   |
| chr14 | 97035793  | 97036353  | 561    | 97036067  | 37   |
| chr14 | 99045517  | 99045774  | 258    | 99045646  | 23   |
| chr14 | 99183017  | 99183539  | 523    | 99183173  | 31   |
| chr14 | 99850649  | 99851214  | 566    | 99851031  | 41   |
| chr14 | 101163629 | 101164255 | 627    | 101163878 | 89   |
| chr14 | 101622572 | 101623912 | 1341   | 101623291 | 63   |
| chr14 | 102036037 | 102036584 | 548    | 102036327 | 21   |
| chr14 | 102090968 | 102091798 | 831    | 102091128 | 96   |
| chr14 | 102593296 | 102594216 | 921    | 102593648 | 53   |
| chr14 | 103404401 | 103404982 | 582    | 103404840 | 60   |
| chr14 | 103649975 | 103650571 | 597    | 103650279 | 56   |
| chr14 | 104504561 | 104505363 | 803    | 104504950 | 62   |
| chr14 | 104513427 | 104514084 | 658    | 104513743 | 48   |
| chr14 | 104628902 | 104629646 | 745    | 104629283 | 63   |
| chr14 | 104741772 | 104742459 | 688    | 104742116 | 31   |
| chr14 | 104922360 | 104923060 | 701    | 104922816 | 58   |
| chr14 | 104974287 | 104975141 | 855    | 104974693 | 95   |
| chr14 | 105020693 | 105021328 | 636    | 105020960 | 72   |
| chr15 | 20519962  | 20520429  | 468    | 20520150  | 29   |
| chr15 | 25723871  | 25724528  | 658    | 25724180  | 22   |
| chr15 | 26798721  | 26799060  | 340    | 26798838  | 18   |
| chr15 | 28550176  | 28551077  | 902    | 28550646  | 40   |
| chr15 | 29070806  | 29071595  | 790    | 29071175  | 40   |
| chr15 | 29230035  | 29230505  | 471    | 29230337  | 26   |
| chr15 | 37636049  | 37636379  | 331    | 37636180  | 20   |
| chr15 | 38848745  | 38849295  | 551    | 38849043  | 45   |
| chr15 | 38923088  | 38924040  | 953    | 38923720  | 42   |
| chr15 | 39853729  | 39854362  | 634    | 39854031  | 28   |
| chr15 | 39912380  | 39912646  | 267    | 39912524  | 23   |

| <b>Chr</b> | <b>Start</b> | <b>End</b> | <b>Length</b> | <b>Summit</b> | <b>Tags</b> |
|------------|--------------|------------|---------------|---------------|-------------|
| chr15      | 40090665     | 40091243   | 579           | 40090864      | 63          |
| chr15      | 40234143     | 40234424   | 282           | 40234299      | 24          |
| chr15      | 41298834     | 41299094   | 261           | 41298964      | 27          |
| chr15      | 41825909     | 41826456   | 548           | 41826085      | 31          |
| chr15      | 42891512     | 42891798   | 287           | 42891668      | 25          |
| chr15      | 43457504     | 43458146   | 643           | 43457817      | 20          |
| chr15      | 47475580     | 47476248   | 669           | 47475918      | 23          |
| chr15      | 47700207     | 47700818   | 612           | 47700479      | 26          |
| chr15      | 49117768     | 49118168   | 401           | 49117917      | 39          |
| chr15      | 50098334     | 50099592   | 1259          | 50099259      | 64          |
| chr15      | 54448693     | 54449083   | 391           | 54448931      | 22          |
| chr15      | 54812999     | 54813474   | 476           | 54813189      | 41          |
| chr15      | 57012897     | 57013497   | 601           | 57013270      | 41          |
| chr15      | 57245154     | 57245538   | 385           | 57245419      | 32          |
| chr15      | 58396347     | 58396954   | 608           | 58396650      | 22          |
| chr15      | 58671735     | 58672510   | 776           | 58672124      | 29          |
| chr15      | 64194303     | 64194651   | 349           | 64194453      | 40          |
| chr15      | 64921580     | 64922568   | 989           | 64921925      | 57          |
| chr15      | 68596625     | 68597005   | 381           | 68596775      | 73          |
| chr15      | 69443459     | 69443845   | 387           | 69443632      | 32          |
| chr15      | 69739888     | 69740267   | 380           | 69740010      | 19          |
| chr15      | 70196816     | 70197939   | 1124          | 70197281      | 61          |
| chr15      | 70276324     | 70277396   | 1073          | 70276586      | 54          |
| chr15      | 70310238     | 70311271   | 1034          | 70310711      | 61          |
| chr15      | 70553361     | 70554788   | 1428          | 70554475      | 62          |
| chr15      | 72005736     | 72007609   | 1874          | 72007180      | 87          |
| chr15      | 72694720     | 72695489   | 770           | 72695165      | 62          |
| chr15      | 73775665     | 73776345   | 681           | 73775957      | 57          |
| chr15      | 75962221     | 75962999   | 779           | 75962626      | 120         |
| chr15      | 76378745     | 76379217   | 473           | 76379038      | 26          |
| chr15      | 76818528     | 76818937   | 410           | 76818678      | 23          |
| chr15      | 76843077     | 76843655   | 579           | 76843526      | 40          |
| chr15      | 76952028     | 76952538   | 511           | 76952237      | 40          |
| chr15      | 77106930     | 77107224   | 295           | 77107052      | 44          |
| chr15      | 78138726     | 78139704   | 979           | 78139295      | 41          |
| chr15      | 81292253     | 81292541   | 289           | 81292375      | 27          |
| chr15      | 81526349     | 81527299   | 951           | 81527071      | 79          |
| chr15      | 81840368     | 81840694   | 327           | 81840516      | 41          |
| chr15      | 82460905     | 82461167   | 263           | 82461036      | 29          |
| chr15      | 85512071     | 85512290   | 220           | 85512181      | 17          |
| chr15      | 87722465     | 87723165   | 701           | 87722829      | 31          |
| chr15      | 88873842     | 88874734   | 893           | 88874372      | 56          |
| chr15      | 90217035     | 90217362   | 328           | 90217194      | 25          |
| chr15      | 90362977     | 90363483   | 507           | 90363330      | 37          |
| chr15      | 92175900     | 92176218   | 319           | 92176069      | 22          |
| chr15      | 93018431     | 93018867   | 437           | 93018616      | 20          |
| chr15      | 93021696     | 93021996   | 301           | 93021860      | 20          |
| chr15      | 93226390     | 93226919   | 530           | 93226540      | 61          |
| chr15      | 96923151     | 96923496   | 346           | 96923314      | 35          |
| chr15      | 97008776     | 97009432   | 657           | 97009222      | 31          |
| chr15      | 97088276     | 97088707   | 432           | 97088543      | 22          |
| chr15      | 97923557     | 97924117   | 561           | 97923730      | 47          |
| chr15      | 99652496     | 99653174   | 679           | 99652993      | 31          |

| <b>Chr</b> | <b>Start</b> | <b>End</b> | <b>Length</b> | <b>Summit</b> | <b>Tags</b> |
|------------|--------------|------------|---------------|---------------|-------------|
| chr15      | 100081677    | 100082407  | 731           | 100082145     | 33          |
| chr16      | 583537       | 584057     | 521           | 583696        | 50          |
| chr16      | 657885       | 658366     | 482           | 658057        | 26          |
| chr16      | 960232       | 961371     | 1140          | 960636        | 61          |
| chr16      | 1538714      | 1539176    | 463           | 1538832       | 46          |
| chr16      | 1778402      | 1779146    | 745           | 1778835       | 42          |
| chr16      | 1816091      | 1817447    | 1357          | 1816424       | 51          |
| chr16      | 1823222      | 1823711    | 490           | 1823353       | 39          |
| chr16      | 1903111      | 1903628    | 518           | 1903446       | 73          |
| chr16      | 1949280      | 1949784    | 505           | 1949450       | 29          |
| chr16      | 2165625      | 2166849    | 1225          | 2166570       | 69          |
| chr16      | 2766983      | 2767672    | 690           | 2767294       | 36          |
| chr16      | 3447473      | 3448545    | 1073          | 3447688       | 77          |
| chr16      | 4587178      | 4587600    | 423           | 4587471       | 27          |
| chr16      | 4723874      | 4724569    | 696           | 4724103       | 46          |
| chr16      | 4792045      | 4793180    | 1136          | 4792862       | 56          |
| chr16      | 8646990      | 8647450    | 461           | 8647326       | 36          |
| chr16      | 8717993      | 8718267    | 275           | 8718138       | 25          |
| chr16      | 8964286      | 8965709    | 1424          | 8964849       | 67          |
| chr16      | 10830099     | 10830641   | 543           | 10830347      | 31          |
| chr16      | 10945646     | 10946261   | 616           | 10945809      | 40          |
| chr16      | 11614560     | 11615088   | 529           | 11614823      | 29          |
| chr16      | 12539804     | 12540247   | 444           | 12540092      | 21          |
| chr16      | 12554612     | 12555081   | 470           | 12554860      | 46          |
| chr16      | 12804826     | 12805449   | 624           | 12805309      | 32          |
| chr16      | 14400798     | 14401097   | 300           | 14400901      | 25          |
| chr16      | 14932932     | 14933185   | 254           | 14933059      | 22          |
| chr16      | 15644281     | 15644738   | 458           | 15644600      | 25          |
| chr16      | 15651242     | 15651780   | 539           | 15651377      | 43          |
| chr16      | 16310931     | 16312270   | 1340          | 16311988      | 67          |
| chr16      | 18379546     | 18380189   | 644           | 18379850      | 32          |
| chr16      | 18924541     | 18925188   | 648           | 18924816      | 28          |
| chr16      | 21420356     | 21421543   | 1188          | 21421196      | 64          |
| chr16      | 22109009     | 22109975   | 967           | 22109808      | 56          |
| chr16      | 23067379     | 23067790   | 412           | 23067559      | 37          |
| chr16      | 23067866     | 23068794   | 929           | 23068655      | 47          |
| chr16      | 23514866     | 23515338   | 473           | 23515208      | 22          |
| chr16      | 23687480     | 23687885   | 406           | 23687639      | 19          |
| chr16      | 25198360     | 25198778   | 419           | 25198587      | 47          |
| chr16      | 28210845     | 28211525   | 681           | 28211316      | 35          |
| chr16      | 29123412     | 29123784   | 373           | 29123538      | 18          |
| chr16      | 29983894     | 29984546   | 653           | 29984123      | 82          |
| chr16      | 30077302     | 30077995   | 694           | 30077652      | 41          |
| chr16      | 30576580     | 30577152   | 573           | 30576743      | 35          |
| chr16      | 30812597     | 30813342   | 746           | 30812977      | 39          |
| chr16      | 31192563     | 31192917   | 355           | 31192735      | 65          |
| chr16      | 31193937     | 31194310   | 374           | 31194184      | 32          |
| chr16      | 31377557     | 31378860   | 1304          | 31378631      | 70          |
| chr16      | 45491888     | 45492579   | 692           | 45492215      | 46          |
| chr16      | 46835594     | 46836230   | 637           | 46835966      | 71          |
| chr16      | 46957106     | 46957664   | 559           | 46957338      | 44          |
| chr16      | 48901239     | 48901669   | 431           | 48901455      | 33          |
| chr16      | 49333205     | 49334163   | 959           | 49333467      | 39          |

| Chr   | Start    | End      | Length | Summit   | Tags |
|-------|----------|----------|--------|----------|------|
| chr16 | 51646150 | 51646687 | 538    | 51646422 | 35   |
| chr16 | 52093930 | 52094977 | 1048   | 52094644 | 59   |
| chr16 | 52878153 | 52878817 | 665    | 52878392 | 48   |
| chr16 | 53438650 | 53438930 | 281    | 53438777 | 30   |
| chr16 | 55276428 | 55276658 | 231    | 55276543 | 27   |
| chr16 | 55300187 | 55300620 | 434    | 55300351 | 19   |
| chr16 | 55851892 | 55852620 | 729    | 55852246 | 35   |
| chr16 | 56580252 | 56580732 | 481    | 56580436 | 32   |
| chr16 | 57360098 | 57360376 | 279    | 57360223 | 27   |
| chr16 | 65544735 | 65545264 | 530    | 65544992 | 47   |
| chr16 | 66000761 | 66001148 | 388    | 66000885 | 29   |
| chr16 | 67166475 | 67166828 | 354    | 67166673 | 40   |
| chr16 | 67236580 | 67237307 | 728    | 67236983 | 56   |
| chr16 | 68073412 | 68073803 | 392    | 68073575 | 31   |
| chr16 | 68156954 | 68158144 | 1191   | 68157308 | 46   |
| chr16 | 68587292 | 68587630 | 339    | 68587483 | 22   |
| chr16 | 71631519 | 71632164 | 646    | 71631891 | 38   |
| chr16 | 73870749 | 73871034 | 286    | 73870904 | 28   |
| chr16 | 74055531 | 74056386 | 856    | 74056206 | 38   |
| chr16 | 74108596 | 74109248 | 653    | 74108887 | 33   |
| chr16 | 77155336 | 77155701 | 366    | 77155471 | 27   |
| chr16 | 77339873 | 77340082 | 210    | 77339978 | 12   |
| chr16 | 80310182 | 80310656 | 475    | 80310484 | 27   |
| chr16 | 82526810 | 82527421 | 612    | 82527145 | 54   |
| chr16 | 82707549 | 82708419 | 871    | 82707869 | 60   |
| chr16 | 83380151 | 83380440 | 290    | 83380302 | 40   |
| chr16 | 83811375 | 83811904 | 530    | 83811740 | 36   |
| chr16 | 83834328 | 83835084 | 757    | 83834607 | 55   |
| chr16 | 83987263 | 83987631 | 369    | 83987443 | 28   |
| chr16 | 84066201 | 84066601 | 401    | 84066409 | 40   |
| chr16 | 85146050 | 85146563 | 514    | 85146370 | 31   |
| chr16 | 85216161 | 85216589 | 429    | 85216458 | 37   |
| chr16 | 87049029 | 87049831 | 803    | 87049356 | 46   |
| chr16 | 87103200 | 87103664 | 465    | 87103469 | 31   |
| chr16 | 87163977 | 87164573 | 597    | 87164215 | 30   |
| chr16 | 87195872 | 87196418 | 547    | 87196111 | 80   |
| chr16 | 87248366 | 87249277 | 912    | 87249051 | 56   |
| chr16 | 87419288 | 87420503 | 1216   | 87420137 | 73   |
| chr16 | 87787384 | 87788073 | 690    | 87787881 | 38   |
| chr16 | 87998499 | 87998914 | 416    | 87998643 | 34   |
| chr17 | 775118   | 775569   | 452    | 775273   | 29   |
| chr17 | 829166   | 830054   | 889    | 829375   | 47   |
| chr17 | 873920   | 874621   | 702    | 874276   | 46   |
| chr17 | 1498903  | 1499980  | 1078   | 1499719  | 68   |
| chr17 | 2334784  | 2335260  | 477    | 2335071  | 39   |
| chr17 | 2543545  | 2544333  | 789    | 2543963  | 38   |
| chr17 | 2568160  | 2568567  | 408    | 2568429  | 35   |
| chr17 | 3517857  | 3518485  | 629    | 3518109  | 37   |
| chr17 | 3768976  | 3769533  | 558    | 3769307  | 32   |
| chr17 | 4037200  | 4037590  | 391    | 4037357  | 39   |
| chr17 | 4243799  | 4244252  | 454    | 4244127  | 19   |
| chr17 | 4409506  | 4410897  | 1392   | 4410118  | 82   |
| chr17 | 5330036  | 5330811  | 776    | 5330372  | 48   |

| Chr   | Start    | End      | Length | Summit   | Tags |
|-------|----------|----------|--------|----------|------|
| chr17 | 5426397  | 5426923  | 527    | 5426703  | 41   |
| chr17 | 6411478  | 6411870  | 393    | 6411744  | 28   |
| chr17 | 7198281  | 7198837  | 557    | 7198477  | 50   |
| chr17 | 7392772  | 7393510  | 739    | 7392899  | 45   |
| chr17 | 7431922  | 7432266  | 345    | 7432107  | 35   |
| chr17 | 7459152  | 7459384  | 233    | 7459268  | 14   |
| chr17 | 7683325  | 7683719  | 395    | 7683468  | 56   |
| chr17 | 8093146  | 8093521  | 376    | 8093305  | 29   |
| chr17 | 8279641  | 8280407  | 767    | 8279916  | 39   |
| chr17 | 12633337 | 12633860 | 524    | 12633495 | 52   |
| chr17 | 14463752 | 14464190 | 439    | 14464061 | 29   |
| chr17 | 15843377 | 15844398 | 1022   | 15844004 | 44   |
| chr17 | 16048870 | 16049282 | 413    | 16048994 | 20   |
| chr17 | 17687032 | 17687534 | 503    | 17687372 | 39   |
| chr17 | 18312436 | 18313004 | 569    | 18312695 | 32   |
| chr17 | 18693890 | 18694351 | 462    | 18694021 | 26   |
| chr17 | 18825907 | 18826636 | 730    | 18826316 | 91   |
| chr17 | 18834409 | 18834929 | 521    | 18834599 | 55   |
| chr17 | 18881833 | 18882494 | 662    | 18882149 | 35   |
| chr17 | 18954782 | 18955453 | 672    | 18954913 | 38   |
| chr17 | 19571787 | 19572258 | 472    | 19572099 | 62   |
| chr17 | 20970918 | 20971435 | 518    | 20971310 | 44   |
| chr17 | 21044415 | 21044827 | 413    | 21044704 | 37   |
| chr17 | 21128056 | 21129031 | 976    | 21128506 | 73   |
| chr17 | 23633817 | 23634233 | 417    | 23634042 | 24   |
| chr17 | 23879063 | 23879404 | 342    | 23879205 | 64   |
| chr17 | 24253503 | 24254584 | 1082   | 24254219 | 72   |
| chr17 | 24453818 | 24454371 | 554    | 24453946 | 31   |
| chr17 | 24501390 | 24501670 | 281    | 24501531 | 25   |
| chr17 | 24741237 | 24741730 | 494    | 24741398 | 22   |
| chr17 | 25256414 | 25256858 | 445    | 25256539 | 27   |
| chr17 | 25642200 | 25643532 | 1333   | 25642517 | 65   |
| chr17 | 26059862 | 26060732 | 871    | 26060150 | 49   |
| chr17 | 26842916 | 26843309 | 394    | 26843180 | 25   |
| chr17 | 26947574 | 26948238 | 665    | 26947937 | 27   |
| chr17 | 27466712 | 27467093 | 382    | 27466898 | 38   |
| chr17 | 27692861 | 27693554 | 694    | 27693347 | 45   |
| chr17 | 28228047 | 28228579 | 533    | 28228416 | 24   |
| chr17 | 31102083 | 31102583 | 501    | 31102325 | 47   |
| chr17 | 31622396 | 31622964 | 569    | 31622691 | 15   |
| chr17 | 33933343 | 33933781 | 439    | 33933468 | 13   |
| chr17 | 35159800 | 35160316 | 517    | 35159962 | 37   |
| chr17 | 35590509 | 35590853 | 345    | 35590695 | 62   |
| chr17 | 35901397 | 35901723 | 327    | 35901564 | 43   |
| chr17 | 37025167 | 37025712 | 546    | 37025395 | 31   |
| chr17 | 37182817 | 37183398 | 582    | 37183180 | 47   |
| chr17 | 37202930 | 37203491 | 562    | 37203211 | 49   |
| chr17 | 37691967 | 37692290 | 324    | 37692126 | 32   |
| chr17 | 37793619 | 37794488 | 870    | 37793972 | 60   |
| chr17 | 38014665 | 38015475 | 811    | 38015003 | 32   |
| chr17 | 38073461 | 38074095 | 635    | 38073735 | 30   |
| chr17 | 38083567 | 38084078 | 512    | 38083868 | 37   |
| chr17 | 39067509 | 39067923 | 415    | 39067717 | 23   |

| Chr   | Start    | End      | Length | Summit   | Tags |
|-------|----------|----------|--------|----------|------|
| chr17 | 39504744 | 39505033 | 290    | 39504865 | 38   |
| chr17 | 39740696 | 39741197 | 502    | 39740995 | 42   |
| chr17 | 40476700 | 40477107 | 408    | 40476981 | 36   |
| chr17 | 40480145 | 40480571 | 427    | 40480303 | 28   |
| chr17 | 40484242 | 40484852 | 611    | 40484449 | 33   |
| chr17 | 40560267 | 40560914 | 648    | 40560557 | 38   |
| chr17 | 40865496 | 40866304 | 809    | 40865929 | 48   |
| chr17 | 41625948 | 41627490 | 1543   | 41627292 | 92   |
| chr17 | 43304285 | 43304869 | 585    | 43304602 | 46   |
| chr17 | 43533542 | 43534121 | 580    | 43533907 | 23   |
| chr17 | 44933874 | 44934379 | 506    | 44934063 | 65   |
| chr17 | 44980973 | 44981467 | 495    | 44981230 | 47   |
| chr17 | 45321789 | 45322214 | 426    | 45322088 | 30   |
| chr17 | 45327165 | 45327564 | 400    | 45327317 | 38   |
| chr17 | 45610076 | 45610956 | 881    | 45610569 | 61   |
| chr17 | 50604996 | 50605318 | 323    | 50605191 | 24   |
| chr17 | 52149910 | 52150254 | 345    | 52150065 | 58   |
| chr17 | 53282175 | 53282794 | 620    | 53282487 | 32   |
| chr17 | 55051819 | 55052251 | 433    | 55051950 | 27   |
| chr17 | 55823901 | 55824786 | 886    | 55824440 | 39   |
| chr17 | 56785824 | 56786252 | 429    | 56785933 | 17   |
| chr17 | 58876981 | 58877787 | 807    | 58877412 | 53   |
| chr17 | 60207627 | 60208472 | 846    | 60208080 | 45   |
| chr17 | 60401714 | 60402670 | 957    | 60402134 | 57   |
| chr17 | 60482920 | 60483799 | 880    | 60483427 | 51   |
| chr17 | 63144229 | 63144583 | 355    | 63144395 | 20   |
| chr17 | 63419748 | 63420783 | 1036   | 63420350 | 50   |
| chr17 | 65114941 | 65115390 | 450    | 65115085 | 25   |
| chr17 | 67500834 | 67501555 | 722    | 67501202 | 48   |
| chr17 | 68831576 | 68832195 | 620    | 68831907 | 33   |
| chr17 | 69935178 | 69935707 | 530    | 69935346 | 33   |
| chr17 | 70405978 | 70406448 | 471    | 70406279 | 80   |
| chr17 | 70901315 | 70902014 | 700    | 70901641 | 43   |
| chr17 | 70903528 | 70903851 | 324    | 70903698 | 20   |
| chr17 | 71327362 | 71327860 | 499    | 71327599 | 29   |
| chr17 | 71534960 | 71535618 | 659    | 71535227 | 100  |
| chr17 | 71553729 | 71554065 | 337    | 71553921 | 25   |
| chr17 | 71960624 | 71961267 | 644    | 71960909 | 37   |
| chr17 | 72093031 | 72094013 | 983    | 72093583 | 49   |
| chr17 | 72105062 | 72105506 | 445    | 72105197 | 36   |
| chr17 | 73014565 | 73015072 | 508    | 73014906 | 31   |
| chr17 | 73466301 | 73467082 | 782    | 73466698 | 40   |
| chr17 | 73590762 | 73591168 | 407    | 73590885 | 22   |
| chr17 | 74045229 | 74045463 | 235    | 74045346 | 17   |
| chr17 | 74478385 | 74478903 | 519    | 74478741 | 52   |
| chr17 | 74582305 | 74582884 | 580    | 74582556 | 45   |
| chr17 | 75623984 | 75624479 | 496    | 75624321 | 27   |
| chr17 | 75689482 | 75690209 | 728    | 75689859 | 44   |
| chr17 | 76917727 | 76918416 | 690    | 76918122 | 45   |
| chr17 | 77384024 | 77384681 | 658    | 77384444 | 35   |
| chr17 | 77684741 | 77685057 | 317    | 77684929 | 17   |
| chr17 | 78070272 | 78071754 | 1483   | 78070737 | 63   |
| chr17 | 78302514 | 78303841 | 1328   | 78302812 | 57   |



| Chr   | Start    | End      | Length | Summit   | Tags |
|-------|----------|----------|--------|----------|------|
| chr17 | 78340263 | 78340849 | 587    | 78340554 | 161  |
| chr17 | 78409879 | 78410694 | 816    | 78410031 | 57   |
| chr17 | 78427244 | 78427700 | 457    | 78427398 | 34   |
| chr17 | 78601972 | 78603548 | 1577   | 78602356 | 80   |
| chr17 | 78647869 | 78648309 | 441    | 78648016 | 60   |
| chr18 | 525807   | 526483   | 677    | 526134   | 24   |
| chr18 | 3920934  | 3921254  | 321    | 3921127  | 26   |
| chr18 | 6193815  | 6194144  | 330    | 6193995  | 61   |
| chr18 | 7956589  | 7957189  | 601    | 7956878  | 19   |
| chr18 | 9709749  | 9710245  | 497    | 9709914  | 25   |
| chr18 | 11629198 | 11629502 | 305    | 11629371 | 26   |
| chr18 | 12013252 | 12013713 | 462    | 12013555 | 71   |
| chr18 | 12028159 | 12028714 | 556    | 12028427 | 35   |
| chr18 | 12244450 | 12245090 | 641    | 12244736 | 41   |
| chr18 | 19054329 | 19054767 | 439    | 19054577 | 71   |
| chr18 | 19420112 | 19421115 | 1004   | 19420916 | 58   |
| chr18 | 27925718 | 27927246 | 1529   | 27926548 | 86   |
| chr18 | 31580851 | 31581335 | 485    | 31581026 | 37   |
| chr18 | 31962854 | 31963664 | 811    | 31963364 | 36   |
| chr18 | 32131337 | 32132139 | 803    | 32131646 | 42   |
| chr18 | 34585997 | 34586268 | 272    | 34586141 | 32   |
| chr18 | 36700266 | 36700555 | 290    | 36700392 | 19   |
| chr18 | 43830458 | 43831141 | 684    | 43830806 | 31   |
| chr18 | 43940139 | 43940422 | 284    | 43940294 | 35   |
| chr18 | 43941569 | 43942335 | 767    | 43941889 | 40   |
| chr18 | 44320874 | 44321924 | 1051   | 44321471 | 70   |
| chr18 | 47046512 | 47046755 | 244    | 47046634 | 11   |
| chr18 | 51270563 | 51270928 | 366    | 51270723 | 47   |
| chr18 | 51451389 | 51451651 | 263    | 51451520 | 21   |
| chr18 | 53404741 | 53405233 | 493    | 53404984 | 25   |
| chr18 | 55126731 | 55127219 | 489    | 55126857 | 21   |
| chr18 | 57715080 | 57715397 | 318    | 57715223 | 28   |
| chr18 | 59184762 | 59186034 | 1273   | 59185464 | 89   |
| chr18 | 72952422 | 72952763 | 342    | 72952589 | 31   |
| chr18 | 74955029 | 74955256 | 228    | 74955143 | 12   |
| chr18 | 75277682 | 75278104 | 423    | 75277862 | 20   |
| chr18 | 75386830 | 75387723 | 894    | 75387170 | 56   |
| chr19 | 482238   | 483017   | 780    | 482625   | 54   |
| chr19 | 1337879  | 1338521  | 643    | 1338174  | 52   |
| chr19 | 1353419  | 1354012  | 594    | 1353794  | 39   |
| chr19 | 1407692  | 1408534  | 843    | 1408161  | 44   |
| chr19 | 1447290  | 1447821  | 532    | 1447615  | 30   |
| chr19 | 1697691  | 1698406  | 716    | 1698040  | 59   |
| chr19 | 2009328  | 2009978  | 651    | 2009699  | 51   |
| chr19 | 2164753  | 2165443  | 691    | 2165132  | 51   |
| chr19 | 2442098  | 2442532  | 435    | 2442364  | 46   |
| chr19 | 3087763  | 3088086  | 324    | 3087934  | 22   |
| chr19 | 3294962  | 3295344  | 383    | 3295202  | 35   |
| chr19 | 3349324  | 3350116  | 793    | 3349728  | 101  |
| chr19 | 3471461  | 3472214  | 754    | 3472045  | 83   |
| chr19 | 3523493  | 3524229  | 737    | 3523854  | 61   |
| chr19 | 3713559  | 3713972  | 414    | 3713682  | 29   |
| chr19 | 4241237  | 4241708  | 472    | 4241533  | 35   |

| Chr   | Start    | End      | Length | Summit   | Tags |
|-------|----------|----------|--------|----------|------|
| chr19 | 4351014  | 4351791  | 778    | 4351573  | 47   |
| chr19 | 4621076  | 4621757  | 682    | 4621455  | 39   |
| chr19 | 4745968  | 4746386  | 419    | 4746211  | 29   |
| chr19 | 4987555  | 4988279  | 725    | 4987942  | 46   |
| chr19 | 5705657  | 5705870  | 214    | 5705764  | 16   |
| chr19 | 6485358  | 6485910  | 553    | 6485551  | 32   |
| chr19 | 7397074  | 7397368  | 295    | 7397249  | 19   |
| chr19 | 7486723  | 7487266  | 544    | 7486950  | 30   |
| chr19 | 9981677  | 9982366  | 690    | 9982019  | 72   |
| chr19 | 9983418  | 9983977  | 560    | 9983783  | 66   |
| chr19 | 10107125 | 10107819 | 695    | 10107414 | 66   |
| chr19 | 10223412 | 10224343 | 932    | 10223830 | 64   |
| chr19 | 10842470 | 10843321 | 852    | 10842828 | 50   |
| chr19 | 10859080 | 10859934 | 855    | 10859451 | 49   |
| chr19 | 12721341 | 12721701 | 361    | 12721573 | 26   |
| chr19 | 12754132 | 12754854 | 723    | 12754513 | 44   |
| chr19 | 12757707 | 12758578 | 872    | 12758078 | 60   |
| chr19 | 12765207 | 12766076 | 870    | 12765887 | 84   |
| chr19 | 13858960 | 13859499 | 540    | 13859168 | 25   |
| chr19 | 14748833 | 14749273 | 441    | 14748987 | 32   |
| chr19 | 15248411 | 15248762 | 352    | 15248599 | 25   |
| chr19 | 15404406 | 15404862 | 457    | 15404605 | 28   |
| chr19 | 16443202 | 16444103 | 902    | 16443902 | 56   |
| chr19 | 16705772 | 16706270 | 499    | 16705940 | 34   |
| chr19 | 17221612 | 17222317 | 706    | 17221997 | 101  |
| chr19 | 17874543 | 17874850 | 308    | 17874719 | 24   |
| chr19 | 18056603 | 18056914 | 312    | 18056764 | 47   |
| chr19 | 18252354 | 18254099 | 1746   | 18253715 | 95   |
| chr19 | 18608158 | 18609280 | 1123   | 18608497 | 55   |
| chr19 | 19055387 | 19056087 | 701    | 19055758 | 86   |
| chr19 | 34373777 | 34374138 | 362    | 34373963 | 151  |
| chr19 | 34994239 | 34995071 | 833    | 34994683 | 46   |
| chr19 | 35124749 | 35125141 | 393    | 35124963 | 21   |
| chr19 | 38485026 | 38486530 | 1505   | 38485436 | 72   |
| chr19 | 38555925 | 38557053 | 1129   | 38556256 | 50   |
| chr19 | 39051534 | 39051787 | 254    | 39051661 | 19   |
| chr19 | 39088596 | 39089928 | 1333   | 39088910 | 93   |
| chr19 | 40430958 | 40431475 | 518    | 40431161 | 30   |
| chr19 | 40711958 | 40712329 | 372    | 40712150 | 20   |
| chr19 | 43399673 | 43400134 | 462    | 43399928 | 28   |
| chr19 | 43498167 | 43498970 | 804    | 43498557 | 37   |
| chr19 | 43501094 | 43501584 | 491    | 43501245 | 24   |
| chr19 | 43952100 | 43953662 | 1563   | 43952906 | 145  |
| chr19 | 43969131 | 43969625 | 495    | 43969258 | 28   |
| chr19 | 44019542 | 44019870 | 329    | 44019670 | 42   |
| chr19 | 44292585 | 44293107 | 523    | 44292824 | 33   |
| chr19 | 45065690 | 45066029 | 340    | 45065838 | 44   |
| chr19 | 45081352 | 45081754 | 403    | 45081531 | 33   |
| chr19 | 45097552 | 45098198 | 647    | 45097805 | 58   |
| chr19 | 45528858 | 45529236 | 379    | 45528980 | 20   |
| chr19 | 45663134 | 45663935 | 802    | 45663642 | 59   |
| chr19 | 46525263 | 46525888 | 626    | 46525646 | 57   |
| chr19 | 46584173 | 46584612 | 440    | 46584361 | 58   |

| Chr   | Start    | End      | Length | Summit   | Tags |
|-------|----------|----------|--------|----------|------|
| chr19 | 47170707 | 47171156 | 450    | 47170842 | 31   |
| chr19 | 47344891 | 47345334 | 444    | 47345216 | 29   |
| chr19 | 47548233 | 47548560 | 328    | 47548369 | 46   |
| chr19 | 50106007 | 50106660 | 654    | 50106371 | 32   |
| chr19 | 50346231 | 50347410 | 1180   | 50346715 | 110  |
| chr19 | 50357517 | 50358162 | 646    | 50357817 | 102  |
| chr19 | 50645833 | 50646367 | 535    | 50646098 | 36   |
| chr19 | 50876534 | 50877236 | 703    | 50876959 | 74   |
| chr19 | 51646460 | 51646734 | 275    | 51646587 | 21   |
| chr19 | 51856105 | 51856703 | 599    | 51856510 | 36   |
| chr19 | 51910669 | 51911608 | 940    | 51910980 | 69   |
| chr19 | 52174199 | 52174552 | 354    | 52174361 | 30   |
| chr19 | 52710047 | 52710682 | 636    | 52710232 | 31   |
| chr19 | 52938306 | 52939001 | 696    | 52938770 | 53   |
| chr19 | 54533584 | 54534211 | 628    | 54533857 | 52   |
| chr19 | 54934924 | 54935386 | 463    | 54935250 | 24   |
| chr19 | 54961221 | 54961628 | 408    | 54961421 | 29   |
| chr19 | 56091547 | 56091950 | 404    | 56091773 | 70   |
| chr19 | 56222236 | 56222604 | 369    | 56222372 | 42   |
| chr19 | 57981577 | 57982153 | 577    | 57981879 | 39   |
| chr19 | 63522435 | 63523188 | 754    | 63522623 | 64   |
| chr19 | 63702235 | 63702787 | 553    | 63702397 | 42   |
| chr2  | 1471524  | 1472242  | 719    | 1471876  | 81   |
| chr2  | 1726673  | 1727534  | 862    | 1727179  | 49   |
| chr2  | 3154707  | 3155272  | 566    | 3154886  | 30   |
| chr2  | 3155310  | 3155686  | 377    | 3155512  | 40   |
| chr2  | 3483154  | 3483569  | 416    | 3483307  | 23   |
| chr2  | 3853680  | 3853973  | 294    | 3853849  | 32   |
| chr2  | 10008852 | 10009392 | 541    | 10009004 | 44   |
| chr2  | 10505721 | 10506488 | 768    | 10506229 | 59   |
| chr2  | 10583703 | 10584308 | 606    | 10584079 | 51   |
| chr2  | 14345622 | 14346105 | 484    | 14345796 | 28   |
| chr2  | 15722612 | 15722990 | 379    | 15722797 | 25   |
| chr2  | 16246989 | 16247412 | 424    | 16247283 | 82   |
| chr2  | 19292043 | 19292459 | 417    | 19292204 | 69   |
| chr2  | 20156100 | 20156392 | 293    | 20156244 | 68   |
| chr2  | 20186065 | 20186440 | 376    | 20186226 | 62   |
| chr2  | 20485253 | 20485840 | 588    | 20485515 | 55   |
| chr2  | 20624153 | 20624521 | 369    | 20624318 | 46   |
| chr2  | 23746430 | 23746983 | 554    | 23746763 | 41   |
| chr2  | 24002971 | 24003888 | 918    | 24003668 | 55   |
| chr2  | 24016571 | 24017359 | 789    | 24016837 | 44   |
| chr2  | 25355327 | 25355705 | 379    | 25355531 | 37   |
| chr2  | 26847151 | 26847629 | 479    | 26847463 | 49   |
| chr2  | 27297492 | 27297837 | 346    | 27297700 | 47   |
| chr2  | 28453393 | 28454220 | 828    | 28453896 | 56   |
| chr2  | 28513723 | 28514246 | 524    | 28514041 | 37   |
| chr2  | 28622126 | 28622617 | 492    | 28622491 | 36   |
| chr2  | 28642286 | 28642594 | 309    | 28642465 | 50   |
| chr2  | 29191448 | 29192090 | 643    | 29191765 | 31   |
| chr2  | 29391152 | 29391455 | 304    | 29391283 | 19   |
| chr2  | 29996358 | 29997033 | 676    | 29996640 | 55   |
| chr2  | 30026984 | 30027285 | 302    | 30027125 | 35   |

| Chr  | Start     | End       | Length | Summit    | Tags |
|------|-----------|-----------|--------|-----------|------|
| chr2 | 32088917  | 32089784  | 868    | 32089412  | 54   |
| chr2 | 37047009  | 37047620  | 612    | 37047381  | 31   |
| chr2 | 37710155  | 37710511  | 357    | 37710336  | 25   |
| chr2 | 40531933  | 40532404  | 472    | 40532287  | 26   |
| chr2 | 42452364  | 42452814  | 451    | 42452551  | 36   |
| chr2 | 43239606  | 43240104  | 499    | 43239752  | 32   |
| chr2 | 43242938  | 43243384  | 447    | 43243224  | 29   |
| chr2 | 46377587  | 46378199  | 613    | 46377946  | 32   |
| chr2 | 47021231  | 47022518  | 1288   | 47022277  | 57   |
| chr2 | 48521156  | 48521653  | 498    | 48521310  | 38   |
| chr2 | 54754172  | 54754611  | 440    | 54754307  | 21   |
| chr2 | 58127181  | 58127660  | 480    | 58127340  | 40   |
| chr2 | 60435381  | 60435684  | 304    | 60435557  | 21   |
| chr2 | 63130715  | 63131478  | 764    | 63130890  | 38   |
| chr2 | 64865270  | 64865906  | 637    | 64865608  | 41   |
| chr2 | 64867619  | 64867964  | 346    | 64867750  | 34   |
| chr2 | 64986011  | 64986375  | 365    | 64986228  | 53   |
| chr2 | 65024448  | 65024821  | 374    | 65024620  | 31   |
| chr2 | 65210255  | 65211402  | 1148   | 65211266  | 58   |
| chr2 | 66471986  | 66472547  | 562    | 66472190  | 24   |
| chr2 | 69467411  | 69468310  | 900    | 69468005  | 49   |
| chr2 | 70633818  | 70635106  | 1289   | 70634892  | 69   |
| chr2 | 70677547  | 70677961  | 415    | 70677693  | 48   |
| chr2 | 71210486  | 71211030  | 545    | 71210859  | 32   |
| chr2 | 71211100  | 71211532  | 433    | 71211256  | 27   |
| chr2 | 72113104  | 72113724  | 621    | 72113366  | 56   |
| chr2 | 74545669  | 74546296  | 628    | 74546006  | 27   |
| chr2 | 74609897  | 74611209  | 1313   | 74610539  | 75   |
| chr2 | 87193186  | 87193558  | 373    | 87193348  | 10   |
| chr2 | 96564136  | 96564706  | 571    | 96564483  | 43   |
| chr2 | 96922967  | 96923464  | 498    | 96923147  | 53   |
| chr2 | 97715656  | 97716245  | 590    | 97715916  | 33   |
| chr2 | 98418648  | 98418888  | 241    | 98418768  | 22   |
| chr2 | 98849855  | 98850100  | 246    | 98849978  | 20   |
| chr2 | 105126207 | 105126529 | 323    | 105126330 | 41   |
| chr2 | 106176977 | 106177643 | 667    | 106177375 | 37   |
| chr2 | 108905961 | 108906471 | 511    | 108906109 | 35   |
| chr2 | 109455830 | 109456267 | 438    | 109456138 | 49   |
| chr2 | 112906714 | 112907591 | 878    | 112907253 | 41   |
| chr2 | 113673058 | 113673631 | 574    | 113673430 | 64   |
| chr2 | 114230458 | 114231023 | 566    | 114230759 | 25   |
| chr2 | 118487903 | 118488386 | 484    | 118488259 | 33   |
| chr2 | 118907687 | 118908094 | 408    | 118907815 | 23   |
| chr2 | 119714467 | 119715044 | 578    | 119714675 | 48   |
| chr2 | 121259316 | 121259812 | 497    | 121259541 | 43   |
| chr2 | 121299881 | 121300431 | 551    | 121300186 | 34   |
| chr2 | 128769143 | 128769552 | 410    | 128769430 | 33   |
| chr2 | 130174290 | 130174571 | 282    | 130174463 | 17   |
| chr2 | 130610506 | 130611292 | 787    | 130610846 | 62   |
| chr2 | 131675903 | 131676321 | 419    | 131676144 | 29   |
| chr2 | 134115494 | 134115903 | 410    | 134115686 | 35   |
| chr2 | 151826048 | 151826787 | 740    | 151826466 | 40   |
| chr2 | 152509976 | 152510348 | 373    | 152510127 | 22   |

| Chr   | Start     | End       | Length | Summit    | Tags |
|-------|-----------|-----------|--------|-----------|------|
| chr2  | 153969962 | 153970298 | 337    | 153970151 | 25   |
| chr2  | 157231266 | 157231480 | 215    | 157231373 | 18   |
| chr2  | 159655250 | 159655631 | 382    | 159655387 | 31   |
| chr2  | 159722146 | 159722423 | 278    | 159722297 | 18   |
| chr2  | 168662155 | 168662514 | 360    | 168662362 | 33   |
| chr2  | 173697378 | 173697866 | 489    | 173697620 | 40   |
| chr2  | 176060173 | 176060846 | 674    | 176060513 | 23   |
| chr2  | 176277114 | 176277740 | 627    | 176277419 | 18   |
| chr2  | 177785380 | 177786529 | 1150   | 177785585 | 57   |
| chr2  | 180795688 | 180795994 | 307    | 180795804 | 23   |
| chr2  | 182464525 | 182465357 | 833    | 182464739 | 43   |
| chr2  | 183610652 | 183611760 | 1109   | 183610940 | 40   |
| chr2  | 185258775 | 185259242 | 468    | 185258958 | 18   |
| chr2  | 188696605 | 188697245 | 641    | 188696920 | 21   |
| chr2  | 189266083 | 189266436 | 354    | 189266296 | 13   |
| chr2  | 189827493 | 189827763 | 271    | 189827645 | 27   |
| chr2  | 191151201 | 191151470 | 270    | 191151358 | 20   |
| chr2  | 191169960 | 191170368 | 409    | 191170161 | 22   |
| chr2  | 192250845 | 192251320 | 476    | 192251049 | 26   |
| chr2  | 205569498 | 205569929 | 432    | 205569623 | 19   |
| chr2  | 213724553 | 213725054 | 502    | 213724850 | 28   |
| chr2  | 215256833 | 215257471 | 639    | 215257169 | 31   |
| chr2  | 215382216 | 215383298 | 1083   | 215382852 | 58   |
| chr2  | 218971315 | 218972025 | 711    | 218971650 | 53   |
| chr2  | 218972264 | 218973190 | 927    | 218972634 | 43   |
| chr2  | 219402823 | 219403370 | 548    | 219403093 | 36   |
| chr2  | 219535662 | 219536296 | 635    | 219535987 | 26   |
| chr2  | 219749640 | 219750435 | 796    | 219750155 | 50   |
| chr2  | 220003703 | 220004017 | 315    | 220003894 | 17   |
| chr2  | 220116101 | 220117246 | 1146   | 220116754 | 80   |
| chr2  | 220792329 | 220792581 | 253    | 220792455 | 31   |
| chr2  | 222143885 | 222144466 | 582    | 222144096 | 31   |
| chr2  | 228044904 | 228045428 | 525    | 228045103 | 30   |
| chr2  | 232087130 | 232087626 | 497    | 232087289 | 39   |
| chr2  | 232888961 | 232889389 | 429    | 232889085 | 18   |
| chr2  | 236066987 | 236067802 | 816    | 236067302 | 38   |
| chr2  | 236788012 | 236788358 | 347    | 236788181 | 31   |
| chr2  | 237294388 | 237294717 | 330    | 237294534 | 31   |
| chr2  | 238776329 | 238777381 | 1053   | 238777063 | 50   |
| chr2  | 238840716 | 238841377 | 662    | 238840910 | 42   |
| chr2  | 239703642 | 239704015 | 374    | 239703864 | 38   |
| chr2  | 240188854 | 240189522 | 669    | 240189214 | 28   |
| chr2  | 240631644 | 240632145 | 502    | 240631822 | 48   |
| chr2  | 241102647 | 241103133 | 487    | 241102986 | 48   |
| chr2  | 241494559 | 241495185 | 627    | 241494874 | 48   |
| chr2  | 241943242 | 241944552 | 1311   | 241943609 | 114  |
| chr2  | 242325160 | 242325673 | 514    | 242325521 | 27   |
| chr20 | 309360    | 310599    | 1240   | 309911    | 60   |
| chr20 | 590579    | 591118    | 540    | 590736    | 49   |
| chr20 | 1822918   | 1823613   | 696    | 1823177   | 57   |
| chr20 | 1869880   | 1870320   | 441    | 1870148   | 37   |
| chr20 | 3733022   | 3733362   | 341    | 3733188   | 51   |
| chr20 | 3943819   | 3944580   | 762    | 3944224   | 44   |

| Chr   | Start    | End      | Length | Summit   | Tags |
|-------|----------|----------|--------|----------|------|
| chr20 | 4794958  | 4795426  | 469    | 4795292  | 53   |
| chr20 | 5539400  | 5540042  | 643    | 5539624  | 34   |
| chr20 | 5597104  | 5597469  | 366    | 5597281  | 38   |
| chr20 | 5673478  | 5673859  | 382    | 5673671  | 33   |
| chr20 | 7701106  | 7701345  | 240    | 7701226  | 20   |
| chr20 | 13923665 | 13924818 | 1154   | 13924025 | 84   |
| chr20 | 15149505 | 15149768 | 264    | 15149642 | 17   |
| chr20 | 15404177 | 15404435 | 259    | 15404306 | 21   |
| chr20 | 17986249 | 17986927 | 679    | 17986626 | 28   |
| chr20 | 20532122 | 20532405 | 284    | 20532247 | 23   |
| chr20 | 20641234 | 20641712 | 479    | 20641363 | 19   |
| chr20 | 21231645 | 21232475 | 831    | 21232214 | 31   |
| chr20 | 22308098 | 22308394 | 297    | 22308275 | 21   |
| chr20 | 22611043 | 22611370 | 328    | 22611202 | 63   |
| chr20 | 23028807 | 23029486 | 680    | 23029172 | 40   |
| chr20 | 23048341 | 23048854 | 514    | 23048679 | 28   |
| chr20 | 23068237 | 23068532 | 296    | 23068367 | 22   |
| chr20 | 24267670 | 24268101 | 432    | 24267942 | 25   |
| chr20 | 25265123 | 25265527 | 405    | 25265262 | 35   |
| chr20 | 25412994 | 25413302 | 309    | 25413137 | 34   |
| chr20 | 25552116 | 25553236 | 1121   | 25552405 | 70   |
| chr20 | 29662038 | 29662546 | 509    | 29662323 | 99   |
| chr20 | 29900712 | 29901391 | 680    | 29901083 | 42   |
| chr20 | 29931297 | 29931879 | 583    | 29931601 | 25   |
| chr20 | 29985068 | 29985541 | 474    | 29985416 | 45   |
| chr20 | 30409795 | 30410287 | 493    | 30409952 | 35   |
| chr20 | 31111203 | 31111853 | 651    | 31111491 | 33   |
| chr20 | 31438748 | 31438990 | 243    | 31438869 | 19   |
| chr20 | 32414482 | 32415043 | 562    | 32414674 | 47   |
| chr20 | 33343379 | 33344128 | 750    | 33343744 | 53   |
| chr20 | 34456105 | 34456698 | 594    | 34456385 | 34   |
| chr20 | 34522820 | 34523348 | 529    | 34523052 | 29   |
| chr20 | 35240349 | 35241606 | 1258   | 35240499 | 70   |
| chr20 | 36416622 | 36417161 | 540    | 36416804 | 27   |
| chr20 | 37887626 | 37888133 | 508    | 37887779 | 27   |
| chr20 | 38238569 | 38238837 | 269    | 38238713 | 18   |
| chr20 | 38745122 | 38746027 | 906    | 38745494 | 105  |
| chr20 | 38749832 | 38750623 | 792    | 38750162 | 49   |
| chr20 | 39402645 | 39403262 | 618    | 39402876 | 39   |
| chr20 | 41779214 | 41779710 | 497    | 41779469 | 46   |
| chr20 | 42740358 | 42740916 | 559    | 42740550 | 52   |
| chr20 | 43176506 | 43176927 | 422    | 43176693 | 42   |
| chr20 | 44394248 | 44394783 | 536    | 44394520 | 33   |
| chr20 | 44675567 | 44676041 | 475    | 44675912 | 22   |
| chr20 | 45908737 | 45909232 | 496    | 45908981 | 87   |
| chr20 | 45989757 | 45990042 | 286    | 45989907 | 21   |
| chr20 | 46517648 | 46518012 | 365    | 46517801 | 21   |
| chr20 | 47237987 | 47238713 | 727    | 47238416 | 138  |
| chr20 | 47327702 | 47328597 | 896    | 47328039 | 48   |
| chr20 | 48840530 | 48841010 | 481    | 48840816 | 42   |
| chr20 | 49561194 | 49561473 | 280    | 49561347 | 27   |
| chr20 | 50021100 | 50021484 | 385    | 50021273 | 20   |
| chr20 | 50241145 | 50242333 | 1189   | 50241462 | 47   |

| Chr   | Start    | End      | Length | Summit   | Tags |
|-------|----------|----------|--------|----------|------|
| chr20 | 51644017 | 51644802 | 786    | 51644378 | 32   |
| chr20 | 52223930 | 52224491 | 562    | 52224292 | 38   |
| chr20 | 54583010 | 54583394 | 385    | 54583172 | 57   |
| chr20 | 55062517 | 55063096 | 580    | 55062729 | 95   |
| chr20 | 56317731 | 56318530 | 800    | 56318039 | 51   |
| chr20 | 56677687 | 56677927 | 241    | 56677807 | 17   |
| chr20 | 56700859 | 56701332 | 474    | 56701129 | 29   |
| chr20 | 60158305 | 60158865 | 561    | 60158505 | 36   |
| chr20 | 60339107 | 60339754 | 648    | 60339467 | 31   |
| chr20 | 60959062 | 60959406 | 345    | 60959231 | 32   |
| chr20 | 60978016 | 60978661 | 646    | 60978296 | 34   |
| chr20 | 61066613 | 61066934 | 322    | 61066778 | 30   |
| chr20 | 61621781 | 61623241 | 1461   | 61622918 | 67   |
| chr21 | 14321379 | 14321865 | 487    | 14321507 | 36   |
| chr21 | 15358269 | 15359463 | 1195   | 15358976 | 51   |
| chr21 | 17806595 | 17807654 | 1060   | 17807141 | 73   |
| chr21 | 28927224 | 28927547 | 324    | 28927401 | 34   |
| chr21 | 31798207 | 31798541 | 335    | 31798355 | 23   |
| chr21 | 32645638 | 32646091 | 454    | 32645780 | 36   |
| chr21 | 35182691 | 35183761 | 1071   | 35183291 | 74   |
| chr21 | 36483477 | 36483927 | 451    | 36483728 | 33   |
| chr21 | 36728793 | 36729153 | 361    | 36728940 | 25   |
| chr21 | 41906080 | 41906543 | 464    | 41906414 | 46   |
| chr21 | 42044743 | 42045319 | 577    | 42044928 | 43   |
| chr21 | 42056685 | 42057243 | 559    | 42057030 | 49   |
| chr21 | 42414935 | 42415551 | 617    | 42415144 | 128  |
| chr21 | 42464333 | 42464783 | 451    | 42464462 | 27   |
| chr21 | 43631254 | 43631926 | 673    | 43631556 | 59   |
| chr21 | 43694520 | 43695195 | 676    | 43694767 | 82   |
| chr21 | 43903475 | 43904282 | 808    | 43903827 | 44   |
| chr21 | 44467412 | 44467902 | 491    | 44467777 | 32   |
| chr21 | 44621787 | 44622376 | 590    | 44622103 | 34   |
| chr21 | 46472576 | 46473500 | 925    | 46473219 | 56   |
| chr21 | 46657284 | 46657948 | 665    | 46657780 | 61   |
| chr21 | 46907921 | 46908426 | 506    | 46908259 | 54   |
| chr22 | 16783037 | 16783388 | 352    | 16783262 | 38   |
| chr22 | 16853688 | 16854099 | 412    | 16853913 | 57   |
| chr22 | 16933622 | 16934052 | 431    | 16933796 | 43   |
| chr22 | 17284158 | 17285059 | 902    | 17284779 | 38   |
| chr22 | 17347570 | 17348037 | 468    | 17347701 | 32   |
| chr22 | 17545631 | 17546690 | 1060   | 17545934 | 68   |
| chr22 | 18173902 | 18174383 | 482    | 18174174 | 31   |
| chr22 | 18241804 | 18243303 | 1500   | 18242151 | 99   |
| chr22 | 18351753 | 18352435 | 683    | 18352094 | 70   |
| chr22 | 18510818 | 18511511 | 694    | 18511168 | 34   |
| chr22 | 18635622 | 18636101 | 480    | 18635892 | 58   |
| chr22 | 18676158 | 18676849 | 692    | 18676493 | 45   |
| chr22 | 18758367 | 18759048 | 682    | 18758663 | 31   |
| chr22 | 18783924 | 18784567 | 644    | 18784353 | 32   |
| chr22 | 19215560 | 19215951 | 392    | 19215826 | 39   |
| chr22 | 19303000 | 19303314 | 315    | 19303147 | 29   |
| chr22 | 20177942 | 20178525 | 584    | 20178318 | 28   |
| chr22 | 20215758 | 20216196 | 439    | 20216000 | 17   |

| Chr   | Start    | End      | Length | Summit   | Tags |
|-------|----------|----------|--------|----------|------|
| chr22 | 22915091 | 22915699 | 609    | 22915406 | 75   |
| chr22 | 22996463 | 22997217 | 755    | 22996839 | 37   |
| chr22 | 25219636 | 25220063 | 428    | 25219766 | 34   |
| chr22 | 25275002 | 25275372 | 371    | 25275117 | 24   |
| chr22 | 25294135 | 25294421 | 287    | 25294300 | 29   |
| chr22 | 26238035 | 26238412 | 378    | 26238282 | 24   |
| chr22 | 26478775 | 26479195 | 421    | 26478963 | 65   |
| chr22 | 27609802 | 27610385 | 584    | 27610089 | 30   |
| chr22 | 28033948 | 28034758 | 811    | 28034548 | 127  |
| chr22 | 28102807 | 28103035 | 229    | 28102921 | 23   |
| chr22 | 29781634 | 29781938 | 305    | 29781791 | 40   |
| chr22 | 30669860 | 30670956 | 1097   | 30670544 | 59   |
| chr22 | 30832990 | 30833271 | 282    | 30833144 | 27   |
| chr22 | 31331567 | 31331918 | 352    | 31331759 | 42   |
| chr22 | 32323644 | 32323903 | 260    | 32323774 | 28   |
| chr22 | 32646813 | 32647623 | 811    | 32647050 | 39   |
| chr22 | 34076724 | 34077365 | 642    | 34077029 | 26   |
| chr22 | 35463864 | 35464190 | 327    | 35464047 | 25   |
| chr22 | 35857478 | 35857888 | 411    | 35857656 | 25   |
| chr22 | 35869500 | 35870192 | 693    | 35869755 | 44   |
| chr22 | 35872094 | 35872493 | 400    | 35872236 | 50   |
| chr22 | 36286000 | 36286883 | 884    | 36286456 | 64   |
| chr22 | 36510753 | 36511252 | 500    | 36510975 | 37   |
| chr22 | 36987900 | 36988307 | 408    | 36988177 | 45   |
| chr22 | 37062002 | 37062425 | 424    | 37062290 | 34   |
| chr22 | 37442327 | 37442827 | 501    | 37442496 | 27   |
| chr22 | 37500470 | 37500793 | 324    | 37500618 | 31   |
| chr22 | 38035376 | 38035999 | 624    | 38035691 | 29   |
| chr22 | 39267333 | 39267573 | 241    | 39267453 | 17   |
| chr22 | 40888547 | 40889399 | 853    | 40889218 | 90   |
| chr22 | 41043708 | 41044125 | 418    | 41043916 | 27   |
| chr22 | 41475279 | 41475860 | 582    | 41475631 | 38   |
| chr22 | 41494354 | 41494906 | 553    | 41494483 | 54   |
| chr22 | 41900874 | 41901615 | 742    | 41901261 | 82   |
| chr22 | 42682307 | 42683083 | 777    | 42682662 | 51   |
| chr22 | 42802092 | 42802600 | 509    | 42802446 | 35   |
| chr22 | 44174678 | 44174942 | 265    | 44174806 | 13   |
| chr22 | 44859475 | 44860700 | 1226   | 44859836 | 106  |
| chr22 | 45307928 | 45308445 | 518    | 45308085 | 46   |
| chr22 | 45752566 | 45752904 | 339    | 45752724 | 64   |
| chr22 | 48562355 | 48563417 | 1063   | 48563176 | 64   |
| chr22 | 48883560 | 48883898 | 339    | 48883770 | 41   |
| chr22 | 49082101 | 49082711 | 611    | 49082443 | 44   |
| chr3  | 11108571 | 11109296 | 726    | 11108940 | 50   |
| chr3  | 11735816 | 11736979 | 1164   | 11736145 | 52   |
| chr3  | 14387267 | 14387633 | 367    | 14387391 | 36   |
| chr3  | 14396343 | 14396781 | 439    | 14396457 | 26   |
| chr3  | 14572376 | 14572779 | 404    | 14572568 | 30   |
| chr3  | 28365025 | 28365907 | 883    | 28365349 | 35   |
| chr3  | 37962475 | 37962961 | 487    | 37962738 | 47   |
| chr3  | 38181863 | 38182362 | 500    | 38182028 | 19   |
| chr3  | 38298681 | 38299203 | 523    | 38298966 | 27   |
| chr3  | 38973907 | 38974212 | 306    | 38974036 | 37   |



| Chr  | Start     | End       | Length | Summit    | Tags |
|------|-----------|-----------|--------|-----------|------|
| chr3 | 39729627  | 39730233  | 607    | 39729857  | 23   |
| chr3 | 41215162  | 41216290  | 1129   | 41215922  | 57   |
| chr3 | 45705622  | 45706106  | 485    | 45705753  | 24   |
| chr3 | 46882514  | 46883047  | 534    | 46882833  | 22   |
| chr3 | 46962913  | 46963379  | 467    | 46963136  | 50   |
| chr3 | 46965084  | 46965372  | 289    | 46965222  | 46   |
| chr3 | 47819067  | 47820230  | 1164   | 47819903  | 63   |
| chr3 | 48429528  | 48429987  | 460    | 48429657  | 27   |
| chr3 | 48438512  | 48438901  | 390    | 48438720  | 44   |
| chr3 | 48462817  | 48463506  | 690    | 48463149  | 62   |
| chr3 | 48668086  | 48669573  | 1488   | 48668718  | 85   |
| chr3 | 49552078  | 49552686  | 609    | 49552387  | 27   |
| chr3 | 49913072  | 49913670  | 599    | 49913366  | 36   |
| chr3 | 49942060  | 49942570  | 511    | 49942405  | 44   |
| chr3 | 49952365  | 49953249  | 885    | 49952698  | 49   |
| chr3 | 50362958  | 50363574  | 617    | 50363181  | 51   |
| chr3 | 50403062  | 50403716  | 655    | 50403359  | 46   |
| chr3 | 51403346  | 51404630  | 1285   | 51404276  | 72   |
| chr3 | 52056156  | 52056824  | 669    | 52056488  | 52   |
| chr3 | 52074028  | 52074677  | 650    | 52074391  | 67   |
| chr3 | 52115880  | 52116575  | 696    | 52116216  | 32   |
| chr3 | 53270752  | 53271171  | 420    | 53270942  | 42   |
| chr3 | 53356184  | 53357077  | 894    | 53356721  | 46   |
| chr3 | 53805193  | 53805606  | 414    | 53805501  | 21   |
| chr3 | 54042852  | 54043353  | 502    | 54043031  | 17   |
| chr3 | 55667797  | 55668105  | 309    | 55667968  | 45   |
| chr3 | 58178070  | 58178583  | 514    | 58178400  | 28   |
| chr3 | 66633887  | 66634396  | 510    | 66634240  | 21   |
| chr3 | 69216986  | 69217431  | 446    | 69217183  | 48   |
| chr3 | 69408081  | 69408433  | 353    | 69408203  | 20   |
| chr3 | 69502071  | 69502359  | 289    | 69502237  | 25   |
| chr3 | 69672991  | 69673309  | 319    | 69673182  | 27   |
| chr3 | 71554838  | 71555294  | 457    | 71555168  | 21   |
| chr3 | 72624044  | 72624408  | 365    | 72624175  | 32   |
| chr3 | 75557226  | 75557887  | 662    | 75557513  | 39   |
| chr3 | 99173340  | 99174156  | 817    | 99173565  | 48   |
| chr3 | 99794751  | 99795442  | 692    | 99795248  | 39   |
| chr3 | 107845198 | 107845785 | 588    | 107845480 | 16   |
| chr3 | 114434428 | 114434822 | 395    | 114434693 | 21   |
| chr3 | 114716123 | 114716781 | 659    | 114716400 | 27   |
| chr3 | 120408263 | 120408624 | 362    | 120408393 | 24   |
| chr3 | 121550229 | 121551193 | 965    | 121550870 | 40   |
| chr3 | 123716014 | 123716683 | 670    | 123716497 | 36   |
| chr3 | 124403296 | 124403804 | 509    | 124403478 | 22   |
| chr3 | 124682704 | 124682946 | 243    | 124682825 | 16   |
| chr3 | 124941932 | 124942311 | 380    | 124942117 | 62   |
| chr3 | 127283196 | 127283600 | 405    | 127283453 | 38   |
| chr3 | 128271384 | 128271967 | 584    | 128271802 | 66   |
| chr3 | 131094787 | 131095517 | 731    | 131095355 | 38   |
| chr3 | 138192359 | 138192773 | 415    | 138192580 | 54   |
| chr3 | 142143093 | 142143571 | 479    | 142143397 | 15   |
| chr3 | 144738817 | 144739103 | 287    | 144738948 | 49   |
| chr3 | 147782658 | 147782945 | 288    | 147782784 | 16   |

| Chr  | Start     | End       | Length | Summit    | Tags |
|------|-----------|-----------|--------|-----------|------|
| chr3 | 150858081 | 150859165 | 1085   | 150858283 | 59   |
| chr3 | 152595087 | 152595432 | 346    | 152595302 | 43   |
| chr3 | 154362154 | 154363164 | 1011   | 154362615 | 60   |
| chr3 | 156742637 | 156743141 | 505    | 156742869 | 19   |
| chr3 | 167644778 | 167645697 | 920    | 167644945 | 53   |
| chr3 | 170349859 | 170350204 | 346    | 170350036 | 23   |
| chr3 | 178583444 | 178583813 | 370    | 178583616 | 35   |
| chr3 | 180770209 | 180770787 | 579    | 180770339 | 57   |
| chr3 | 180774759 | 180775049 | 291    | 180774931 | 14   |
| chr3 | 180776612 | 180776868 | 257    | 180776740 | 22   |
| chr3 | 180777006 | 180777375 | 370    | 180777126 | 16   |
| chr3 | 181237085 | 181237540 | 456    | 181237248 | 15   |
| chr3 | 183087133 | 183087437 | 305    | 183087314 | 16   |
| chr3 | 185027058 | 185027315 | 258    | 185027187 | 28   |
| chr3 | 185217831 | 185218269 | 439    | 185217960 | 25   |
| chr3 | 185960640 | 185961382 | 743    | 185961053 | 53   |
| chr3 | 187024914 | 187025974 | 1061   | 187025617 | 41   |
| chr3 | 187840941 | 187841299 | 359    | 187841171 | 25   |
| chr3 | 188937923 | 188938543 | 621    | 188938051 | 45   |
| chr3 | 191008655 | 191009258 | 604    | 191008890 | 40   |
| chr3 | 191068968 | 191069231 | 264    | 191069101 | 18   |
| chr3 | 191086637 | 191087093 | 457    | 191086964 | 27   |
| chr3 | 191091189 | 191091464 | 276    | 191091320 | 20   |
| chr3 | 191238515 | 191238808 | 294    | 191238646 | 32   |
| chr3 | 192529580 | 192530498 | 919    | 192529792 | 48   |
| chr3 | 195334627 | 195335788 | 1162   | 195335530 | 65   |
| chr3 | 195341649 | 195342501 | 853    | 195341952 | 42   |
| chr3 | 197081786 | 197082362 | 577    | 197082009 | 53   |
| chr3 | 197319663 | 197320090 | 428    | 197319890 | 34   |
| chr3 | 197950913 | 197951695 | 783    | 197951564 | 45   |
| chr4 | 968971    | 969250    | 280    | 969102    | 43   |
| chr4 | 1328991   | 1329345   | 355    | 1329145   | 40   |
| chr4 | 1739787   | 1740819   | 1033   | 1740239   | 66   |
| chr4 | 1753997   | 1755047   | 1051   | 1754728   | 81   |
| chr4 | 1755094   | 1755543   | 450    | 1755221   | 31   |
| chr4 | 1827577   | 1828308   | 732    | 1827814   | 70   |
| chr4 | 2596371   | 2596682   | 312    | 2596493   | 20   |
| chr4 | 3311959   | 3312642   | 684    | 3312295   | 37   |
| chr4 | 4007867   | 4008898   | 1032   | 4008296   | 52   |
| chr4 | 4449553   | 4450262   | 710    | 4449915   | 40   |
| chr4 | 6438699   | 6439004   | 306    | 6438863   | 46   |
| chr4 | 6443700   | 6444629   | 930    | 6443996   | 63   |
| chr4 | 6692865   | 6693430   | 566    | 6693197   | 25   |
| chr4 | 6768550   | 6769423   | 874    | 6769012   | 44   |
| chr4 | 6834848   | 6835530   | 683    | 6835327   | 32   |
| chr4 | 7039584   | 7040184   | 601    | 7039823   | 42   |
| chr4 | 7177581   | 7177912   | 332    | 7177781   | 32   |
| chr4 | 7308077   | 7308773   | 697    | 7308414   | 57   |
| chr4 | 7754607   | 7755295   | 689    | 7754971   | 99   |
| chr4 | 8210670   | 8211965   | 1296   | 8211616   | 81   |
| chr4 | 9712354   | 9712583   | 230    | 9712469   | 20   |
| chr4 | 9726684   | 9728003   | 1320   | 9726998   | 75   |
| chr4 | 13316897  | 13317225  | 329    | 13317058  | 27   |

| Chr  | Start     | End       | Length | Summit    | Tags |
|------|-----------|-----------|--------|-----------|------|
| chr4 | 14612461  | 14613372  | 912    | 14613112  | 77   |
| chr4 | 22126119  | 22127026  | 908    | 22126522  | 61   |
| chr4 | 22245176  | 22245617  | 442    | 22245301  | 19   |
| chr4 | 25929936  | 25930790  | 855    | 25930216  | 46   |
| chr4 | 25931674  | 25932348  | 675    | 25932019  | 22   |
| chr4 | 30845211  | 30845496  | 286    | 30845342  | 14   |
| chr4 | 35922012  | 35922820  | 809    | 35922604  | 49   |
| chr4 | 38341335  | 38342691  | 1357   | 38342096  | 75   |
| chr4 | 39316908  | 39317277  | 370    | 39317079  | 24   |
| chr4 | 47181925  | 47182182  | 258    | 47182054  | 15   |
| chr4 | 53026071  | 53027050  | 980    | 53026201  | 36   |
| chr4 | 53099498  | 53100173  | 676    | 53099840  | 23   |
| chr4 | 53472689  | 53472962  | 274    | 53472838  | 13   |
| chr4 | 54625331  | 54625821  | 491    | 54625621  | 27   |
| chr4 | 56171068  | 56171382  | 315    | 56171257  | 19   |
| chr4 | 57265016  | 57265312  | 297    | 57265163  | 26   |
| chr4 | 57298584  | 57298986  | 403    | 57298768  | 35   |
| chr4 | 71789078  | 71790349  | 1272   | 71790198  | 57   |
| chr4 | 75699456  | 75699889  | 434    | 75699621  | 16   |
| chr4 | 76030811  | 76031090  | 280    | 76030961  | 20   |
| chr4 | 77922143  | 77922413  | 271    | 77922272  | 17   |
| chr4 | 78391242  | 78391699  | 458    | 78391533  | 30   |
| chr4 | 78419366  | 78419663  | 298    | 78419523  | 30   |
| chr4 | 82611865  | 82612405  | 541    | 82612185  | 35   |
| chr4 | 88031951  | 88032828  | 878    | 88032097  | 82   |
| chr4 | 88044163  | 88044633  | 471    | 88044291  | 53   |
| chr4 | 88074822  | 88075967  | 1146   | 88075203  | 51   |
| chr4 | 88147207  | 88147762  | 556    | 88147432  | 27   |
| chr4 | 89147463  | 89148064  | 602    | 89147732  | 24   |
| chr4 | 90251278  | 90252039  | 762    | 90251613  | 34   |
| chr4 | 93445556  | 93445964  | 409    | 93445847  | 18   |
| chr4 | 102833921 | 102834231 | 311    | 102834090 | 27   |
| chr4 | 106849003 | 106849609 | 607    | 106849265 | 24   |
| chr4 | 108860482 | 108861338 | 857    | 108860941 | 42   |
| chr4 | 111758593 | 111759035 | 443    | 111758910 | 37   |
| chr4 | 113371971 | 113373056 | 1086   | 113372302 | 56   |
| chr4 | 120214567 | 120215053 | 487    | 120214690 | 26   |
| chr4 | 123938886 | 123939156 | 271    | 123939000 | 17   |
| chr4 | 124384909 | 124385193 | 285    | 124385069 | 19   |
| chr4 | 129496089 | 129496346 | 258    | 129496218 | 14   |
| chr4 | 135316009 | 135316304 | 296    | 135316122 | 14   |
| chr4 | 140594297 | 140594948 | 652    | 140594594 | 38   |
| chr4 | 146320255 | 146321687 | 1433   | 146321284 | 74   |
| chr4 | 146759703 | 146760084 | 382    | 146759959 | 17   |
| chr4 | 147022616 | 147022920 | 305    | 147022747 | 29   |
| chr4 | 147283468 | 147283765 | 298    | 147283599 | 23   |
| chr4 | 148872370 | 148872990 | 621    | 148872790 | 72   |
| chr4 | 149355105 | 149355420 | 316    | 149355296 | 22   |
| chr4 | 149881350 | 149881640 | 291    | 149881510 | 28   |
| chr4 | 152495658 | 152496093 | 436    | 152495939 | 35   |
| chr4 | 153796157 | 153796823 | 667    | 153796560 | 70   |
| chr4 | 153920169 | 153920786 | 618    | 153920479 | 20   |
| chr4 | 154889084 | 154889360 | 277    | 154889209 | 23   |

| <b>Chr</b> | <b>Start</b> | <b>End</b> | <b>Length</b> | <b>Summit</b> | <b>Tags</b> |
|------------|--------------|------------|---------------|---------------|-------------|
| chr4       | 157912065    | 157912400  | 336           | 157912196     | 10          |
| chr4       | 161364718    | 161365061  | 344           | 161364881     | 33          |
| chr4       | 169054898    | 169055193  | 296           | 169055028     | 38          |
| chr4       | 169974407    | 169974728  | 322           | 169974537     | 20          |
| chr4       | 171184975    | 171185536  | 562           | 171185149     | 45          |
| chr4       | 174527400    | 174527772  | 373           | 174527601     | 31          |
| chr4       | 177520555    | 177520850  | 296           | 177520751     | 12          |
| chr4       | 184662158    | 184663651  | 1494          | 184662447     | 91          |
| chr4       | 185906349    | 185906882  | 534           | 185906613     | 86          |
| chr4       | 186583743    | 186584583  | 841           | 186584441     | 56          |
| chr5       | 518730       | 519196     | 467           | 519070        | 21          |
| chr5       | 528958       | 529586     | 629           | 529320        | 34          |
| chr5       | 569481       | 569814     | 334           | 569648        | 34          |
| chr5       | 600747       | 601160     | 414           | 600985        | 56          |
| chr5       | 962189       | 962569     | 381           | 962371        | 53          |
| chr5       | 1126307      | 1126837    | 531           | 1126689       | 28          |
| chr5       | 2210420      | 2211024    | 605           | 2210655       | 58          |
| chr5       | 2763136      | 2763342    | 207           | 2763239       | 15          |
| chr5       | 2804770      | 2805546    | 777           | 2805071       | 62          |
| chr5       | 2811821      | 2812204    | 384           | 2811944       | 20          |
| chr5       | 5475617      | 5476116    | 500           | 5475772       | 28          |
| chr5       | 6431235      | 6432089    | 855           | 6431754       | 30          |
| chr5       | 7019530      | 7020105    | 576           | 7019823       | 26          |
| chr5       | 7449243      | 7449895    | 653           | 7449534       | 28          |
| chr5       | 10581563     | 10581905   | 343           | 10581741      | 38          |
| chr5       | 10814289     | 10815096   | 808           | 10814774      | 30          |
| chr5       | 14358221     | 14358536   | 316           | 14358343      | 16          |
| chr5       | 14713344     | 14713741   | 398           | 14713589      | 17          |
| chr5       | 16727785     | 16728199   | 415           | 16728074      | 34          |
| chr5       | 34965057     | 34966046   | 990           | 34965461      | 45          |
| chr5       | 37883796     | 37884138   | 343           | 37883926      | 33          |
| chr5       | 43156593     | 43157687   | 1095          | 43156761      | 71          |
| chr5       | 52650943     | 52651187   | 245           | 52651065      | 19          |
| chr5       | 56826293     | 56826646   | 354           | 56826445      | 30          |
| chr5       | 57166666     | 57167130   | 465           | 57167002      | 24          |
| chr5       | 57791441     | 57792581   | 1141          | 57791805      | 71          |
| chr5       | 59099914     | 59100527   | 614           | 59100194      | 24          |
| chr5       | 65928955     | 65929317   | 363           | 65929190      | 20          |
| chr5       | 67546844     | 67547974   | 1131          | 67547079      | 67          |
| chr5       | 68281767     | 68282103   | 337           | 68281938      | 49          |
| chr5       | 69042335     | 69042771   | 437           | 69042613      | 12          |
| chr5       | 70050785     | 70051306   | 522           | 70050966      | 28          |
| chr5       | 70621416     | 70622013   | 598           | 70621729      | 21          |
| chr5       | 71639581     | 71640268   | 688           | 71640114      | 35          |
| chr5       | 71903889     | 71904254   | 366           | 71904125      | 28          |
| chr5       | 72469257     | 72469530   | 274           | 72469402      | 21          |
| chr5       | 77211519     | 77211896   | 378           | 77211700      | 30          |
| chr5       | 81303730     | 81304231   | 502           | 81304098      | 23          |
| chr5       | 86744298     | 86744628   | 331           | 86744483      | 21          |
| chr5       | 89794558     | 89795011   | 454           | 89794815      | 26          |
| chr5       | 89860730     | 89861592   | 863           | 89861221      | 39          |
| chr5       | 90711611     | 90712045   | 435           | 90711831      | 36          |
| chr5       | 96024461     | 96024981   | 521           | 96024817      | 40          |

| Chr  | Start     | End       | Length | Summit    | Tags |
|------|-----------|-----------|--------|-----------|------|
| chr5 | 96296101  | 96296999  | 899    | 96296223  | 84   |
| chr5 | 103882284 | 103882906 | 623    | 103882619 | 24   |
| chr5 | 111843086 | 111843380 | 295    | 111843216 | 33   |
| chr5 | 114907945 | 114908697 | 753    | 114908387 | 65   |
| chr5 | 122138363 | 122139195 | 833    | 122138610 | 58   |
| chr5 | 122462931 | 122463713 | 783    | 122463264 | 29   |
| chr5 | 123496402 | 123496743 | 342    | 123496615 | 18   |
| chr5 | 125629563 | 125629869 | 307    | 125629693 | 17   |
| chr5 | 125731993 | 125732327 | 335    | 125732158 | 27   |
| chr5 | 131438053 | 131438561 | 509    | 131438234 | 65   |
| chr5 | 132326903 | 132327668 | 766    | 132327506 | 65   |
| chr5 | 132945490 | 132945926 | 437    | 132945728 | 34   |
| chr5 | 133222000 | 133222654 | 655    | 133222328 | 43   |
| chr5 | 133932776 | 133933276 | 501    | 133933121 | 31   |
| chr5 | 134122164 | 134122833 | 670    | 134122355 | 50   |
| chr5 | 134972049 | 134972351 | 303    | 134972212 | 34   |
| chr5 | 135397389 | 135397764 | 376    | 135397563 | 34   |
| chr5 | 135609703 | 135610008 | 306    | 135609878 | 30   |
| chr5 | 138561670 | 138562232 | 563    | 138561937 | 33   |
| chr5 | 138595750 | 138596142 | 393    | 138595973 | 37   |
| chr5 | 138920640 | 138921508 | 869    | 138921128 | 47   |
| chr5 | 139467177 | 139468139 | 963    | 139467577 | 55   |
| chr5 | 139596986 | 139597303 | 318    | 139597156 | 30   |
| chr5 | 139707918 | 139708307 | 390    | 139708155 | 28   |
| chr5 | 139952804 | 139953415 | 612    | 139953108 | 21   |
| chr5 | 139991946 | 139992498 | 553    | 139992145 | 43   |
| chr5 | 141030775 | 141031470 | 696    | 141031095 | 64   |
| chr5 | 141225811 | 141226197 | 387    | 141226017 | 40   |
| chr5 | 141724197 | 141724668 | 472    | 141724511 | 44   |
| chr5 | 142129797 | 142130484 | 688    | 142130100 | 30   |
| chr5 | 142502861 | 142503185 | 325    | 142503007 | 28   |
| chr5 | 144607224 | 144607593 | 370    | 144607407 | 18   |
| chr5 | 149678420 | 149678905 | 486    | 149678581 | 34   |
| chr5 | 154217892 | 154218606 | 715    | 154218229 | 44   |
| chr5 | 154762782 | 154763291 | 510    | 154763147 | 22   |
| chr5 | 156510566 | 156510850 | 285    | 156510690 | 19   |
| chr5 | 157218416 | 157218943 | 528    | 157218788 | 44   |
| chr5 | 157272597 | 157272843 | 247    | 157272720 | 20   |
| chr5 | 163479473 | 163479721 | 249    | 163479597 | 24   |
| chr5 | 171547411 | 171548214 | 804    | 171547861 | 44   |
| chr5 | 171643241 | 171643918 | 678    | 171643677 | 42   |
| chr5 | 172089202 | 172089664 | 463    | 172089497 | 41   |
| chr5 | 172092966 | 172093562 | 597    | 172093382 | 38   |
| chr5 | 172279729 | 172280535 | 807    | 172280268 | 36   |
| chr5 | 172652087 | 172652550 | 464    | 172652208 | 33   |
| chr5 | 176809174 | 176809685 | 512    | 176809490 | 33   |
| chr5 | 176888871 | 176889257 | 387    | 176889111 | 55   |
| chr5 | 176959379 | 176959916 | 538    | 176959715 | 49   |
| chr5 | 177698394 | 177698664 | 271    | 177698550 | 18   |
| chr6 | 637372    | 638257    | 886    | 637524    | 57   |
| chr6 | 3308269   | 3308958   | 690    | 3308807   | 53   |
| chr6 | 5027941   | 5028460   | 520    | 5028116   | 45   |
| chr6 | 5206031   | 5206608   | 578    | 5206224   | 35   |

| Chr  | Start     | End       | Length | Summit    | Tags |
|------|-----------|-----------|--------|-----------|------|
| chr6 | 6682393   | 6682730   | 338    | 6682600   | 26   |
| chr6 | 7220840   | 7221125   | 286    | 7220976   | 22   |
| chr6 | 7486469   | 7487657   | 1189   | 7486702   | 51   |
| chr6 | 7495209   | 7495675   | 467    | 7495398   | 28   |
| chr6 | 7498876   | 7499255   | 380    | 7499057   | 21   |
| chr6 | 8380537   | 8381164   | 628    | 8380824   | 19   |
| chr6 | 8458425   | 8458692   | 268    | 8458553   | 17   |
| chr6 | 9085495   | 9085719   | 225    | 9085607   | 13   |
| chr6 | 10527058  | 10528421  | 1364   | 10527828  | 72   |
| chr6 | 10664035  | 10664285  | 251    | 10664160  | 18   |
| chr6 | 10946439  | 10946986  | 548    | 10946742  | 15   |
| chr6 | 12119510  | 12120247  | 738    | 12119846  | 32   |
| chr6 | 12169177  | 12169425  | 249    | 12169301  | 28   |
| chr6 | 14379147  | 14379602  | 456    | 14379435  | 46   |
| chr6 | 14824841  | 14825274  | 434    | 14825114  | 26   |
| chr6 | 14912178  | 14912504  | 327    | 14912327  | 37   |
| chr6 | 17501703  | 17502387  | 685    | 17502024  | 27   |
| chr6 | 17849758  | 17850122  | 365    | 17849942  | 33   |
| chr6 | 22551132  | 22551501  | 370    | 22551307  | 26   |
| chr6 | 27032147  | 27032890  | 744    | 27032720  | 23   |
| chr6 | 30828075  | 30828328  | 254    | 30828202  | 24   |
| chr6 | 33493652  | 33494289  | 638    | 33494070  | 33   |
| chr6 | 33709047  | 33709784  | 738    | 33709413  | 71   |
| chr6 | 33738593  | 33738908  | 316    | 33738764  | 38   |
| chr6 | 34172959  | 34173571  | 613    | 34173275  | 34   |
| chr6 | 35527673  | 35528636  | 964    | 35528059  | 42   |
| chr6 | 35529782  | 35530167  | 386    | 35529941  | 25   |
| chr6 | 36827732  | 36828198  | 467    | 36828011  | 65   |
| chr6 | 37102843  | 37103268  | 426    | 37102971  | 31   |
| chr6 | 37320601  | 37320998  | 398    | 37320757  | 40   |
| chr6 | 37604287  | 37604799  | 513    | 37604636  | 32   |
| chr6 | 42477270  | 42477545  | 276    | 42477426  | 40   |
| chr6 | 43164300  | 43164761  | 462    | 43164589  | 38   |
| chr6 | 44160025  | 44160574  | 550    | 44160426  | 40   |
| chr6 | 44202894  | 44203617  | 724    | 44203185  | 74   |
| chr6 | 44384849  | 44385250  | 402    | 44384975  | 45   |
| chr6 | 46897377  | 46897602  | 226    | 46897490  | 14   |
| chr6 | 52476418  | 52477258  | 841    | 52476767  | 56   |
| chr6 | 56515307  | 56515878  | 572    | 56515579  | 51   |
| chr6 | 56971848  | 56972389  | 542    | 56972062  | 55   |
| chr6 | 57062606  | 57063317  | 712    | 57063181  | 39   |
| chr6 | 72054746  | 72055729  | 984    | 72055206  | 48   |
| chr6 | 74470556  | 74470937  | 382    | 74470762  | 20   |
| chr6 | 80311581  | 80311937  | 357    | 80311707  | 15   |
| chr6 | 84100470  | 84101161  | 692    | 84100852  | 33   |
| chr6 | 85540137  | 85540781  | 645    | 85540469  | 19   |
| chr6 | 90942382  | 90942667  | 286    | 90942500  | 23   |
| chr6 | 96278280  | 96278528  | 249    | 96278404  | 23   |
| chr6 | 98512840  | 98513103  | 264    | 98512969  | 20   |
| chr6 | 99501922  | 99502407  | 486    | 99502060  | 19   |
| chr6 | 100391090 | 100391361 | 272    | 100391233 | 22   |
| chr6 | 105494963 | 105495625 | 663    | 105495222 | 28   |
| chr6 | 107354975 | 107355243 | 269    | 107355123 | 26   |

| Chr  | Start     | End       | Length | Summit    | Tags |
|------|-----------|-----------|--------|-----------|------|
| chr6 | 109017154 | 109017648 | 495    | 109017492 | 24   |
| chr6 | 109325368 | 109325626 | 259    | 109325497 | 33   |
| chr6 | 109522332 | 109523177 | 846    | 109523013 | 52   |
| chr6 | 110526416 | 110526780 | 365    | 110526611 | 23   |
| chr6 | 111687022 | 111687662 | 641    | 111687222 | 54   |
| chr6 | 112000938 | 112001247 | 310    | 112001116 | 16   |
| chr6 | 112415258 | 112415569 | 312    | 112415408 | 28   |
| chr6 | 116998841 | 116999576 | 736    | 116999306 | 45   |
| chr6 | 119928862 | 119929164 | 303    | 119929002 | 27   |
| chr6 | 122356253 | 122356511 | 259    | 122356382 | 19   |
| chr6 | 122762233 | 122763214 | 982    | 122762388 | 44   |
| chr6 | 128883218 | 128883848 | 631    | 128883505 | 22   |
| chr6 | 137581788 | 137582443 | 656    | 137582229 | 32   |
| chr6 | 138398941 | 138399245 | 305    | 138399114 | 23   |
| chr6 | 139497700 | 139498336 | 637    | 139497922 | 43   |
| chr6 | 143813257 | 143813869 | 613    | 143813573 | 34   |
| chr6 | 146906247 | 146906877 | 631    | 146906528 | 24   |
| chr6 | 147566381 | 147567145 | 765    | 147566780 | 34   |
| chr6 | 148705410 | 148706097 | 688    | 148705767 | 58   |
| chr6 | 150505497 | 150506417 | 921    | 150506005 | 72   |
| chr6 | 150613728 | 150614027 | 300    | 150613857 | 24   |
| chr6 | 150635404 | 150635742 | 339    | 150635564 | 51   |
| chr6 | 150962575 | 150963194 | 620    | 150962777 | 43   |
| chr6 | 155095887 | 155096814 | 928    | 155096118 | 40   |
| chr6 | 156470573 | 156470973 | 401    | 156470799 | 24   |
| chr6 | 157487714 | 157488025 | 312    | 157487864 | 25   |
| chr6 | 157509993 | 157510795 | 803    | 157510337 | 39   |
| chr6 | 158322362 | 158323099 | 738    | 158322730 | 40   |
| chr6 | 158348240 | 158348734 | 495    | 158348405 | 25   |
| chr6 | 159351023 | 159351376 | 354    | 159351146 | 16   |
| chr6 | 160067839 | 160068808 | 970    | 160068455 | 63   |
| chr6 | 160727920 | 160728281 | 362    | 160728108 | 68   |
| chr6 | 161336347 | 161336604 | 258    | 161336476 | 25   |
| chr6 | 163754637 | 163756174 | 1538   | 163755449 | 70   |
| chr6 | 166716409 | 166716965 | 557    | 166716623 | 31   |
| chr6 | 167289407 | 167290617 | 1211   | 167290232 | 45   |
| chr7 | 981186    | 982126    | 941    | 981736    | 46   |
| chr7 | 988050    | 989039    | 990    | 988568    | 192  |
| chr7 | 1014108   | 1014637   | 530    | 1014279   | 40   |
| chr7 | 1018798   | 1019402   | 605    | 1019205   | 42   |
| chr7 | 1063488   | 1064091   | 604    | 1063754   | 32   |
| chr7 | 1461206   | 1461818   | 613    | 1461598   | 48   |
| chr7 | 1543175   | 1543777   | 603    | 1543556   | 46   |
| chr7 | 1722364   | 1723032   | 669    | 1722710   | 41   |
| chr7 | 2060956   | 2061675   | 720    | 2061318   | 86   |
| chr7 | 2515795   | 2516291   | 497    | 2516148   | 51   |
| chr7 | 2564729   | 2565520   | 792    | 2565090   | 76   |
| chr7 | 4012831   | 4013221   | 391    | 4013060   | 34   |
| chr7 | 5484693   | 5485191   | 499    | 5485000   | 41   |
| chr7 | 5532216   | 5532714   | 499    | 5532435   | 31   |
| chr7 | 6354768   | 6355461   | 694    | 6355096   | 38   |
| chr7 | 6410166   | 6410643   | 478    | 6410344   | 48   |
| chr7 | 6595835   | 6596686   | 852    | 6596191   | 35   |

| Chr  | Start     | End       | Length | Summit    | Tags |
|------|-----------|-----------|--------|-----------|------|
| chr7 | 7106593   | 7106917   | 325    | 7106789   | 68   |
| chr7 | 12692716  | 12693676  | 961    | 12693105  | 83   |
| chr7 | 16427974  | 16428245  | 272    | 16428121  | 18   |
| chr7 | 20336557  | 20337447  | 891    | 20337328  | 55   |
| chr7 | 21433934  | 21434442  | 509    | 21434168  | 31   |
| chr7 | 23474976  | 23476092  | 1117   | 23475768  | 42   |
| chr7 | 25868672  | 25869057  | 386    | 25868801  | 17   |
| chr7 | 26093945  | 26094220  | 276    | 26094070  | 20   |
| chr7 | 26870468  | 26871067  | 600    | 26870826  | 27   |
| chr7 | 27136072  | 27136823  | 752    | 27136467  | 46   |
| chr7 | 29570890  | 29571309  | 420    | 29570999  | 23   |
| chr7 | 30290408  | 30291669  | 1262   | 30290698  | 57   |
| chr7 | 30746818  | 30747327  | 510    | 30747128  | 35   |
| chr7 | 32422006  | 32422418  | 413    | 32422256  | 45   |
| chr7 | 33357875  | 33358081  | 207    | 33357978  | 17   |
| chr7 | 35099410  | 35099800  | 391    | 35099539  | 16   |
| chr7 | 36126096  | 36126514  | 419    | 36126216  | 26   |
| chr7 | 37922287  | 37922889  | 603    | 37922583  | 23   |
| chr7 | 44064097  | 44064931  | 835    | 44064630  | 113  |
| chr7 | 44754353  | 44755500  | 1148   | 44755178  | 85   |
| chr7 | 55400750  | 55401827  | 1078   | 55401134  | 59   |
| chr7 | 55743272  | 55743510  | 239    | 55743391  | 16   |
| chr7 | 64135793  | 64136323  | 531    | 64135981  | 20   |
| chr7 | 65378793  | 65379016  | 224    | 65378905  | 17   |
| chr7 | 65756591  | 65757396  | 806    | 65756929  | 43   |
| chr7 | 65784123  | 65784949  | 827    | 65784535  | 51   |
| chr7 | 73131465  | 73131813  | 349    | 73131647  | 58   |
| chr7 | 73226022  | 73226879  | 858    | 73226433  | 51   |
| chr7 | 73554749  | 73555340  | 592    | 73554961  | 29   |
| chr7 | 73578183  | 73578563  | 381    | 73578338  | 25   |
| chr7 | 73594805  | 73595205  | 401    | 73594960  | 61   |
| chr7 | 75342882  | 75343241  | 360    | 75343065  | 25   |
| chr7 | 75406233  | 75406692  | 460    | 75406383  | 65   |
| chr7 | 75761760  | 75762360  | 601    | 75762105  | 26   |
| chr7 | 75764702  | 75765044  | 343    | 75764913  | 42   |
| chr7 | 75935266  | 75935650  | 385    | 75935481  | 32   |
| chr7 | 75944067  | 75944718  | 652    | 75944262  | 51   |
| chr7 | 76433397  | 76433715  | 319    | 76433587  | 19   |
| chr7 | 77265911  | 77266457  | 547    | 77266071  | 27   |
| chr7 | 86507123  | 86507737  | 615    | 86507448  | 19   |
| chr7 | 88023660  | 88024129  | 470    | 88023876  | 13   |
| chr7 | 89788126  | 89788459  | 334    | 89788338  | 12   |
| chr7 | 96024875  | 96025202  | 328    | 96025003  | 12   |
| chr7 | 97553323  | 97553805  | 483    | 97553677  | 43   |
| chr7 | 97763068  | 97763516  | 449    | 97763248  | 48   |
| chr7 | 98827893  | 98828941  | 1049   | 98828424  | 55   |
| chr7 | 99535965  | 99536802  | 838    | 99536400  | 55   |
| chr7 | 100200290 | 100201287 | 998    | 100200505 | 79   |
| chr7 | 101038556 | 101039108 | 553    | 101038920 | 48   |
| chr7 | 101438845 | 101439205 | 361    | 101439057 | 19   |
| chr7 | 105219451 | 105219862 | 412    | 105219704 | 25   |
| chr7 | 105486181 | 105486667 | 487    | 105486368 | 79   |
| chr7 | 105539392 | 105540486 | 1095   | 105539726 | 79   |



| Chr  | Start     | End       | Length | Summit    | Tags |
|------|-----------|-----------|--------|-----------|------|
| chr7 | 108689158 | 108689391 | 234    | 108689275 | 11   |
| chr7 | 109961847 | 109962156 | 310    | 109962025 | 61   |
| chr7 | 113513320 | 113514192 | 873    | 113513632 | 48   |
| chr7 | 114212118 | 114212568 | 451    | 114212247 | 22   |
| chr7 | 116065294 | 116065896 | 603    | 116065615 | 18   |
| chr7 | 119160809 | 119161205 | 397    | 119161036 | 22   |
| chr7 | 125511191 | 125511498 | 308    | 125511319 | 11   |
| chr7 | 126714513 | 126714940 | 428    | 126714644 | 22   |
| chr7 | 127015126 | 127016104 | 979    | 127015736 | 60   |
| chr7 | 129379290 | 129380207 | 918    | 129379926 | 56   |
| chr7 | 133861891 | 133862177 | 287    | 133862016 | 38   |
| chr7 | 134546735 | 134547335 | 601    | 134546979 | 45   |
| chr7 | 138777305 | 138777604 | 300    | 138777427 | 33   |
| chr7 | 142020985 | 142021273 | 289    | 142021145 | 19   |
| chr7 | 142350949 | 142351422 | 474    | 142351257 | 30   |
| chr7 | 148027511 | 148028023 | 513    | 148027703 | 31   |
| chr7 | 148475135 | 148476064 | 930    | 148475449 | 54   |
| chr7 | 151791510 | 151792517 | 1008   | 151791798 | 42   |
| chr7 | 154719886 | 154720667 | 782    | 154720366 | 37   |
| chr7 | 154969418 | 154969845 | 428    | 154969714 | 38   |
| chr7 | 155066749 | 155067159 | 411    | 155066878 | 33   |
| chr7 | 158341674 | 158342366 | 693    | 158342037 | 41   |
| chr8 | 2062615   | 2063295   | 681    | 2063056   | 29   |
| chr8 | 6289739   | 6289932   | 194    | 6289836   | 18   |
| chr8 | 6618792   | 6619272   | 481    | 6619017   | 41   |
| chr8 | 12656068  | 12657647  | 1580   | 12656538  | 58   |
| chr8 | 21965449  | 21965754  | 306    | 21965627  | 44   |
| chr8 | 22016955  | 22017685  | 731    | 22017394  | 107  |
| chr8 | 22031014  | 22031885  | 872    | 22031151  | 65   |
| chr8 | 22140924  | 22141516  | 593    | 22141263  | 43   |
| chr8 | 22143944  | 22144541  | 598    | 22144085  | 64   |
| chr8 | 23137876  | 23138390  | 515    | 23138110  | 29   |
| chr8 | 26204667  | 26205270  | 604    | 26204855  | 32   |
| chr8 | 26490400  | 26491377  | 978    | 26491201  | 52   |
| chr8 | 27804102  | 27804553  | 452    | 27804423  | 47   |
| chr8 | 28325222  | 28325854  | 633    | 28325532  | 25   |
| chr8 | 29209673  | 29209994  | 322    | 29209829  | 34   |
| chr8 | 29683925  | 29684182  | 258    | 29684054  | 19   |
| chr8 | 30433845  | 30434287  | 443    | 30434168  | 17   |
| chr8 | 37571571  | 37572192  | 622    | 37571783  | 108  |
| chr8 | 37672173  | 37672813  | 641    | 37672368  | 42   |
| chr8 | 38207992  | 38208920  | 929    | 38208386  | 69   |
| chr8 | 41708280  | 41708689  | 410    | 41708530  | 19   |
| chr8 | 43255137  | 43255435  | 299    | 43255308  | 37   |
| chr8 | 49597649  | 49597909  | 261    | 49597779  | 26   |
| chr8 | 49769864  | 49770410  | 547    | 49770139  | 23   |
| chr8 | 51453031  | 51453431  | 401    | 51453225  | 77   |
| chr8 | 61591606  | 61592339  | 734    | 61591975  | 28   |
| chr8 | 62072624  | 62072990  | 367    | 62072823  | 55   |
| chr8 | 64243906  | 64244412  | 507    | 64244140  | 17   |
| chr8 | 67101258  | 67101550  | 293    | 67101381  | 19   |
| chr8 | 67849704  | 67850305  | 602    | 67850000  | 25   |
| chr8 | 74821424  | 74822185  | 762    | 74821803  | 37   |

| Chr  | Start     | End       | Length | Summit    | Tags |
|------|-----------|-----------|--------|-----------|------|
| chr8 | 81057175  | 81057654  | 480    | 81057499  | 31   |
| chr8 | 91065493  | 91066202  | 710    | 91065826  | 40   |
| chr8 | 91726902  | 91728008  | 1107   | 91727790  | 64   |
| chr8 | 96166840  | 96167122  | 283    | 96166997  | 22   |
| chr8 | 96197102  | 96197469  | 368    | 96197231  | 39   |
| chr8 | 96310456  | 96310755  | 300    | 96310633  | 44   |
| chr8 | 99508296  | 99509194  | 899    | 99508751  | 47   |
| chr8 | 101294182 | 101295241 | 1060   | 101294969 | 43   |
| chr8 | 101391215 | 101391917 | 703    | 101391606 | 36   |
| chr8 | 101539688 | 101540162 | 475    | 101539994 | 43   |
| chr8 | 101648810 | 101649078 | 269    | 101648939 | 27   |
| chr8 | 101759976 | 101760508 | 533    | 101760337 | 42   |
| chr8 | 102032979 | 102034282 | 1304   | 102033612 | 74   |
| chr8 | 102286465 | 102287668 | 1204   | 102287062 | 69   |
| chr8 | 102326809 | 102327063 | 255    | 102326936 | 19   |
| chr8 | 102519685 | 102520317 | 633    | 102520050 | 61   |
| chr8 | 103735164 | 103736141 | 978    | 103735615 | 54   |
| chr8 | 103736710 | 103737913 | 1204   | 103737564 | 70   |
| chr8 | 103887732 | 103888849 | 1118   | 103888253 | 57   |
| chr8 | 103891755 | 103892526 | 772    | 103892311 | 62   |
| chr8 | 105670235 | 105671074 | 840    | 105670747 | 31   |
| chr8 | 107351154 | 107352304 | 1151   | 107351622 | 49   |
| chr8 | 110443674 | 110444114 | 441    | 110443833 | 13   |
| chr8 | 110725934 | 110726560 | 627    | 110726250 | 27   |
| chr8 | 117950751 | 117951028 | 278    | 117950881 | 13   |
| chr8 | 124322390 | 124323194 | 805    | 124322830 | 90   |
| chr8 | 125453327 | 125454368 | 1042   | 125453814 | 43   |
| chr8 | 125792588 | 125793075 | 488    | 125792915 | 31   |
| chr8 | 128742736 | 128742993 | 258    | 128742865 | 19   |
| chr8 | 130086591 | 130086858 | 268    | 130086721 | 24   |
| chr8 | 131390817 | 131391103 | 287    | 131390970 | 24   |
| chr8 | 131521068 | 131521409 | 342    | 131521240 | 26   |
| chr8 | 134404618 | 134405088 | 471    | 134404926 | 116  |
| chr8 | 136746218 | 136746556 | 339    | 136746406 | 30   |
| chr8 | 140976246 | 140976535 | 290    | 140976376 | 27   |
| chr8 | 141289237 | 141289711 | 475    | 141289401 | 29   |
| chr8 | 143482063 | 143482985 | 923    | 143482487 | 45   |
| chr8 | 143867368 | 143868212 | 845    | 143867756 | 44   |
| chr8 | 143872445 | 143873199 | 755    | 143872783 | 81   |
| chr8 | 144309970 | 144310462 | 493    | 144310276 | 23   |
| chr8 | 144434329 | 144434648 | 320    | 144434491 | 36   |
| chr8 | 144537471 | 144538131 | 661    | 144537790 | 30   |
| chr8 | 144694523 | 144695139 | 617    | 144694875 | 43   |
| chr8 | 144976745 | 144977309 | 565    | 144976976 | 37   |
| chr8 | 145000931 | 145001402 | 472    | 145001104 | 24   |
| chr8 | 145022780 | 145023996 | 1217   | 145023279 | 77   |
| chr8 | 145031978 | 145033040 | 1063   | 145032473 | 93   |
| chr8 | 145034345 | 145035487 | 1143   | 145034689 | 133  |
| chr8 | 145084450 | 145085413 | 964    | 145085156 | 56   |
| chr8 | 145132777 | 145133428 | 652    | 145133162 | 64   |
| chr8 | 145142133 | 145142410 | 278    | 145142302 | 25   |
| chr8 | 145300370 | 145300817 | 448    | 145300687 | 39   |
| chr8 | 145408256 | 145409223 | 968    | 145408589 | 35   |

| Chr  | Start     | End       | Length | Summit    | Tags |
|------|-----------|-----------|--------|-----------|------|
| chr8 | 145486952 | 145487436 | 485    | 145487123 | 24   |
| chr8 | 145697816 | 145698612 | 797    | 145698440 | 108  |
| chr8 | 145711080 | 145711606 | 527    | 145711236 | 66   |
| chr8 | 145988321 | 145989020 | 700    | 145988673 | 82   |
| chr9 | 8551428   | 8551748   | 321    | 8551554   | 13   |
| chr9 | 14304906  | 14305757  | 852    | 14305441  | 45   |
| chr9 | 14312265  | 14313025  | 761    | 14312528  | 39   |
| chr9 | 16814488  | 16814825  | 338    | 16814655  | 35   |
| chr9 | 36390292  | 36391491  | 1200   | 36390557  | 60   |
| chr9 | 36477366  | 36478115  | 750    | 36477605  | 43   |
| chr9 | 37458425  | 37458947  | 523    | 37458766  | 34   |
| chr9 | 37719437  | 37719923  | 487    | 37719617  | 52   |
| chr9 | 38885258  | 38885542  | 285    | 38885414  | 25   |
| chr9 | 40197200  | 40197450  | 251    | 40197325  | 10   |
| chr9 | 40781721  | 40782241  | 521    | 40782041  | 23   |
| chr9 | 41599133  | 41599667  | 535    | 41599463  | 21   |
| chr9 | 42165683  | 42165939  | 257    | 42165811  | 11   |
| chr9 | 42233708  | 42234095  | 388    | 42233971  | 10   |
| chr9 | 67126024  | 67126243  | 220    | 67126134  | 10   |
| chr9 | 68671283  | 68671813  | 531    | 68671473  | 42   |
| chr9 | 69810255  | 69810466  | 212    | 69810361  | 14   |
| chr9 | 72063683  | 72064205  | 523    | 72064033  | 30   |
| chr9 | 72224228  | 72225307  | 1080   | 72224519  | 41   |
| chr9 | 76892755  | 76893678  | 924    | 76893132  | 61   |
| chr9 | 79786072  | 79786356  | 285    | 79786204  | 24   |
| chr9 | 85117331  | 85117615  | 285    | 85117490  | 16   |
| chr9 | 85512160  | 85512869  | 710    | 85512561  | 45   |
| chr9 | 86656685  | 86656976  | 292    | 86656829  | 18   |
| chr9 | 89779176  | 89779670  | 495    | 89779545  | 42   |
| chr9 | 91169390  | 91169814  | 425    | 91169497  | 22   |
| chr9 | 91347424  | 91348008  | 585    | 91347636  | 32   |
| chr9 | 92603554  | 92604389  | 836    | 92603854  | 64   |
| chr9 | 92801929  | 92802321  | 393    | 92802157  | 40   |
| chr9 | 94457066  | 94457653  | 588    | 94457197  | 47   |
| chr9 | 94602479  | 94602722  | 244    | 94602601  | 18   |
| chr9 | 95253163  | 95254119  | 957    | 95253728  | 46   |
| chr9 | 95949705  | 95950185  | 481    | 95950016  | 33   |
| chr9 | 98219947  | 98221623  | 1677   | 98220758  | 76   |
| chr9 | 98368574  | 98368956  | 383    | 98368704  | 16   |
| chr9 | 98841021  | 98841553  | 533    | 98841375  | 47   |
| chr9 | 99498888  | 99499724  | 837    | 99499472  | 63   |
| chr9 | 107046344 | 107047217 | 874    | 107046547 | 45   |
| chr9 | 107249838 | 107250686 | 849    | 107250226 | 33   |
| chr9 | 107259791 | 107260333 | 543    | 107260164 | 35   |
| chr9 | 108683041 | 108683300 | 260    | 108683171 | 14   |
| chr9 | 109282313 | 109282697 | 385    | 109282529 | 33   |
| chr9 | 109541623 | 109542164 | 542    | 109542039 | 32   |
| chr9 | 110345665 | 110345973 | 309    | 110345795 | 23   |
| chr9 | 115395887 | 115396549 | 663    | 115396246 | 32   |
| chr9 | 116226176 | 116226914 | 739    | 116226529 | 41   |
| chr9 | 118640209 | 118640464 | 256    | 118640337 | 12   |
| chr9 | 122670664 | 122671528 | 865    | 122671148 | 50   |
| chr9 | 123069917 | 123070547 | 631    | 123070214 | 22   |

| Chr  | Start     | End       | Length | Summit    | Tags |
|------|-----------|-----------|--------|-----------|------|
| chr9 | 128452222 | 128452702 | 481    | 128452348 | 29   |
| chr9 | 128979362 | 128979782 | 421    | 128979508 | 45   |
| chr9 | 129226334 | 129226893 | 560    | 129226689 | 37   |
| chr9 | 129770098 | 129770422 | 325    | 129770285 | 34   |
| chr9 | 130052305 | 130053103 | 799    | 130052718 | 51   |
| chr9 | 130142220 | 130143122 | 903    | 130142677 | 60   |
| chr9 | 130800389 | 130801043 | 655    | 130800722 | 38   |
| chr9 | 131164378 | 131164732 | 355    | 131164549 | 83   |
| chr9 | 131264461 | 131264711 | 251    | 131264586 | 20   |
| chr9 | 131687840 | 131688341 | 502    | 131688024 | 50   |
| chr9 | 132426219 | 132426791 | 573    | 132426482 | 23   |
| chr9 | 133498735 | 133498993 | 259    | 133498864 | 19   |
| chr9 | 133874546 | 133875015 | 470    | 133874782 | 49   |
| chr9 | 134985800 | 134986842 | 1043   | 134986090 | 71   |
| chr9 | 135013416 | 135014930 | 1515   | 135013794 | 82   |
| chr9 | 135243218 | 135243659 | 442    | 135243531 | 35   |
| chr9 | 135393018 | 135393654 | 637    | 135393339 | 69   |
| chr9 | 135880114 | 135880719 | 606    | 135880353 | 34   |
| chr9 | 136372029 | 136372555 | 527    | 136372312 | 38   |
| chr9 | 136387175 | 136387759 | 585    | 136387432 | 85   |
| chr9 | 137938939 | 137939744 | 806    | 137939442 | 38   |
| chr9 | 138149943 | 138150957 | 1015   | 138150571 | 57   |
| chr9 | 138277083 | 138277780 | 698    | 138277534 | 55   |
| chr9 | 138337567 | 138338107 | 541    | 138337739 | 54   |
| chr9 | 138581884 | 138582345 | 462    | 138582034 | 37   |
| chr9 | 138757498 | 138758083 | 586    | 138757717 | 74   |
| chr9 | 138804977 | 138806426 | 1450   | 138805540 | 77   |
| chr9 | 138863055 | 138864189 | 1135   | 138863902 | 48   |
| chr9 | 139059679 | 139060226 | 548    | 139060040 | 39   |
| chr9 | 139158070 | 139158503 | 434    | 139158208 | 25   |
| chr9 | 139208906 | 139209629 | 724    | 139209345 | 60   |
| chr9 | 139722918 | 139723370 | 453    | 139723070 | 37   |
| chr9 | 139729704 | 139730016 | 313    | 139729863 | 32   |
| chr9 | 139891926 | 139893177 | 1252   | 139892859 | 78   |
| chrX | 133083    | 133676    | 594    | 133410    | 22   |
| chrX | 299553    | 299922    | 370    | 299780    | 10   |
| chrX | 2537204   | 2537513   | 310    | 2537335   | 12   |
| chrX | 3291083   | 3291333   | 251    | 3291208   | 25   |
| chrX | 3640297   | 3640900   | 604    | 3640595   | 20   |
| chrX | 3771755   | 3772129   | 375    | 3771878   | 12   |
| chrX | 3810071   | 3810678   | 608    | 3810306   | 23   |
| chrX | 3847598   | 3847970   | 373    | 3847762   | 10   |
| chrX | 3848506   | 3849060   | 555    | 3848744   | 23   |
| chrX | 5408594   | 5409084   | 491    | 5408930   | 15   |
| chrX | 9860330   | 9860855   | 526    | 9860553   | 13   |
| chrX | 9942949   | 9943378   | 430    | 9943249   | 14   |
| chrX | 10002471  | 10002987  | 517    | 10002802  | 25   |
| chrX | 11685906  | 11686539  | 634    | 11686168  | 24   |
| chrX | 15782834  | 15783260  | 427    | 15782947  | 12   |
| chrX | 16798293  | 16798835  | 543    | 16798541  | 19   |
| chrX | 17333680  | 17334037  | 358    | 17333825  | 29   |
| chrX | 17788918  | 17789321  | 404    | 17789042  | 11   |
| chrX | 19918423  | 19918798  | 376    | 19918588  | 10   |

| <b>Chr</b> | <b>Start</b> | <b>End</b> | <b>Length</b> | <b>Summit</b> | <b>Tags</b> |
|------------|--------------|------------|---------------|---------------|-------------|
| chrX       | 23835750     | 23836195   | 446           | 23836015      | 12          |
| chrX       | 30804519     | 30804786   | 268           | 30804641      | 21          |
| chrX       | 39653136     | 39653536   | 401           | 39653258      | 13          |
| chrX       | 39728461     | 39728899   | 439           | 39728697      | 14          |
| chrX       | 40867111     | 40867365   | 255           | 40867238      | 12          |
| chrX       | 40981999     | 40982403   | 405           | 40982130      | 13          |
| chrX       | 41135691     | 41136324   | 634           | 41135961      | 40          |
| chrX       | 41667832     | 41668269   | 438           | 41667974      | 13          |
| chrX       | 42664883     | 42665355   | 473           | 42665038      | 17          |
| chrX       | 44785032     | 44785659   | 628           | 44785334      | 20          |
| chrX       | 46703171     | 46703470   | 300           | 46703343      | 15          |
| chrX       | 47305432     | 47305876   | 445           | 47305613      | 15          |
| chrX       | 47402868     | 47403252   | 385           | 47402986      | 15          |
| chrX       | 48699884     | 48700406   | 523           | 48700153      | 20          |
| chrX       | 48919662     | 48920106   | 445           | 48919780      | 15          |
| chrX       | 56813244     | 56813703   | 460           | 56813427      | 43          |
| chrX       | 62891498     | 62891977   | 480           | 62891821      | 16          |
| chrX       | 67970981     | 67971243   | 263           | 67971112      | 35          |
| chrX       | 68031164     | 68031448   | 285           | 68031324      | 11          |
| chrX       | 68421984     | 68422193   | 210           | 68422089      | 10          |
| chrX       | 69254394     | 69254646   | 253           | 69254520      | 17          |
| chrX       | 70204705     | 70205182   | 478           | 70204990      | 16          |
| chrX       | 70798080     | 70798491   | 412           | 70798210      | 32          |
| chrX       | 71154944     | 71155436   | 493           | 71155138      | 21          |
| chrX       | 71263256     | 71263536   | 281           | 71263424      | 22          |
| chrX       | 73013501     | 73013839   | 339           | 73013674      | 36          |
| chrX       | 74061528     | 74061921   | 394           | 74061800      | 10          |
| chrX       | 79538934     | 79539309   | 376           | 79539181      | 10          |
| chrX       | 80383908     | 80384256   | 349           | 80384140      | 17          |
| chrX       | 83265292     | 83265532   | 241           | 83265412      | 12          |
| chrX       | 93542226     | 93542494   | 269           | 93542355      | 10          |
| chrX       | 96824930     | 96825227   | 298           | 96825046      | 13          |
| chrX       | 105802407    | 105802887  | 481           | 105802593     | 20          |
| chrX       | 105856716    | 105857085  | 370           | 105856922     | 10          |
| chrX       | 107130589    | 107131132  | 544           | 107130967     | 43          |
| chrX       | 116786949    | 116787275  | 327           | 116787068     | 11          |
| chrX       | 118500528    | 118500964  | 437           | 118500785     | 20          |
| chrX       | 118889474    | 118889943  | 470           | 118889694     | 13          |
| chrX       | 120743619    | 120743852  | 234           | 120743736     | 12          |
| chrX       | 126083628    | 126084286  | 659           | 126083941     | 22          |
| chrX       | 129059531    | 129059936  | 406           | 129059787     | 36          |
| chrX       | 129210689    | 129211174  | 486           | 129211001     | 25          |
| chrX       | 131450937    | 131451475  | 539           | 131451161     | 23          |
| chrX       | 131839911    | 131840224  | 314           | 131840036     | 14          |
| chrX       | 133510964    | 133511694  | 731           | 133511094     | 20          |
| chrX       | 133646589    | 133646988  | 400           | 133646785     | 12          |
| chrX       | 133993675    | 133994367  | 693           | 133994209     | 46          |
| chrX       | 142144324    | 142144739  | 416           | 142144612     | 14          |
| chrX       | 148394389    | 148394957  | 569           | 148394691     | 26          |
| chrX       | 149683042    | 149683283  | 242           | 149683163     | 19          |
| chrX       | 150315916    | 150316571  | 656           | 150316302     | 23          |
| chrX       | 152564819    | 152565147  | 329           | 152564977     | 31          |
| chrX       | 152621788    | 152622117  | 330           | 152621926     | 20          |

| <b>Chr</b> | <b>Start</b> | <b>End</b> | <b>Length</b> | <b>Summit</b> | <b>Tags</b> |
|------------|--------------|------------|---------------|---------------|-------------|
| chrX       | 152725712    | 152726153  | 442           | 152725873     | 19          |
| chrX       | 153253450    | 153254104  | 655           | 153253762     | 31          |
| chrX       | 153269526    | 153269980  | 455           | 153269715     | 15          |
| chrX       | 154264860    | 154265261  | 402           | 154264979     | 11          |
| chrY       | 133139       | 133576     | 438           | 133412        | 15          |
| chrY       | 254671       | 255185     | 515           | 254836        | 23          |
| chrY       | 1470974      | 1471417    | 444           | 1471165       | 14          |
| chrY       | 2863499      | 2864354    | 856           | 2864083       | 24          |
| chrY       | 17289758     | 17290002   | 245           | 17289880      | 10          |
| chrY       | 18337657     | 18337974   | 318           | 18337820      | 13          |
| chrY       | 18957570     | 18958014   | 445           | 18957861      | 17          |
| chrY       | 20939459     | 20939852   | 394           | 20939742      | 10          |
| chrY       | 24974615     | 24974942   | 328           | 24974818      | 10          |
